# Supplementary material
Source: publisher site journal article supplement (https://www.dovepress.com/get_supplementary_file.php?f=353130.xlsx)
Supplement: Supplementary file 1 [file get_supplementary_file.php]

## Sheet: Additional regions of KB-PA_3
location	start	stop	strand	type	function	nucleotide_sequence	aa_sequence
Additonal Region 1
KB-PA_3-chr1	295866	295621	-	CDS	hypothetical protein	atgcgtaatcatgtagtgatagaggactgggaaggcgacggtgctattcgcctacccgacgacgttctccaggaaatgggcgtcgacgttggggacacgctctacctccttgaggaatatgtgggtacaacccgctgtctggtgctgagtaagtcaccgcgcattcctgatcgcgtggatgagctggttggccactgggagtcgtttggcaaggtctccgccgagataaacaccaaggacgagtga	MRNHVVIEDWEGDGAIRLPDDVLQEMGVDVGDTLYLLEEYVGTTRCLVLSKSPRIPDRVDELVGHWESFGKVSAEINTKDE
KB-PA_3-chr1	296459	298738	+	CDS	hypothetical protein	atgattgagtcaatacggatagtgggggtggcttcgtatggacaagaggtacaagcgcttgatgggctgacgaagttcaactttatctacggtgccaatgggtgtggcaaaaccacaatttccagggtgatcgacaaccctactcgttacccgagttgccatgttggctggaagagtggagtgcctcttcaggccatggtctacaaccgcgacttcgttgcacgtaatttcggtccctccgcggagctcaaaggcatcttcaccctcggtgaaaagaacgtcgacaatcttgccaagatcgcggcactcaagcaggaatccggtcgctgtagtgaacgcatcagcagtctgagggagactctagaagggctggatggtcagggaggaaaacgcaaagaa…	MIESIRIVGVASYGQEVQALDGLTKFNFIYGANGCGKTTISRVIDNPTRYPSCHVGWKSGVPLQAMVYNRDFVARNFGPSAELKGIFTLGEKNVDNLAKIAALKQESGRCSERISSLRETLEGLDGQGGKRKELADLEARFLEACWAQKKKHDSAFALAFQGVRNNAENFKVRVLQEHGGNSAALVSLADLQEKAKTIFGPSPVSEPLVVLPTFDALLSHESNPILSKRVLGREDVDIAAMIKALGNSDWVRQGRAYFDEATGICPFCQQATETSFAASLEAYFDETFLNDSLAIDDLAKTYSAAADQLLAQLSEILNAPSRFLDAETLKTEVALLASRIALNRQQLADKQREPSQLVALEPLADVLYAISQALAVANEQIKAHNATVANLGKEKQQLA…
KB-PA_3-chr1	298805	300112	+	CDS	Chromosome partition protein MukF	atgacagcatccgatcccaatcgcctcattgcctcgctggtgcgggatcaggtcaatcttgacctgaagacagcggatgtctgctttctcgcaggtctgtacctgagagcggacaaggctgggcttgcgtcgttcgaggaagatctgctgatcgacctgttcgaacaggtctgcgatgtcgttgagcccgttgccgaaaatccgcgcaagcgcgcgacccacgccattcaacgattacgcgagcagcgcatgctggcccgagttgatggcgccggcatcgtacgggcgggtgagtatgcactgacacgacttgctgctgcggttatcgaatactttctggcggacgaggccctgactcgggaaagcctcagcttattgaccggcaccttgcgcgctcaa…	MTASDPNRLIASLVRDQVNLDLKTADVCFLAGLYLRADKAGLASFEEDLLIDLFEQVCDVVEPVAENPRKRATHAIQRLREQRMLARVDGAGIVRAGEYALTRLAAAVIEYFLADEALTRESLSLLTGTLRAQLADILATARKAHNDEDWRQRVVAPLRITVGDMVAGIERRQRGLDAQQEEIQAEIASLLSNDWFSAIDRCQSLLDATTHTLRELNEILLRDTHHFVALLQDIQALAVSAENVEAEGAAQRVIEHVDRIGAWGGARQKAWSEYYQYVHRYLRDVVRLDPDRALSQRLRDQIAEWENRPFHLLAAHAGSICLLRPLEARVERPVVARPKTDREAEPAWVEAENALADIEVLVSRALDEGVDTLAGLTVQVLATLTDDSQYVAAGRIADA…
KB-PA_3-chr1	300109	300789	+	CDS	Chromosome partition protein MukE	gtgagcgatgccgtattcgattctctggaagaggtgattgtcgacgagcgattccccgaggtggatctgatgctgcgacgtggacgccatatcggtcgagatgatggcagcccctatgattacctggtggaggcacaggcgctgctcgaacctttttatcggcgtttcggttgtgagctgatccagcagagcgatggctatttctatttgctgcccagcggcgagcggctggggcgacgtcagctatccgtcggcgaaatgcttgtcgggcaggtgctggcgctgatgtatctcgatcccgcgactttgcagcatggcggcatggcgacacgtgaagcgctattgcagcggctgtccggattactgggcaccgatgtgctggtgcgtacgctaaatccg…	MSDAVFDSLEEVIVDERFPEVDLMLRRGRHIGRDDGSPYDYLVEAQALLEPFYRRFGCELIQQSDGYFYLLPSGERLGRRQLSVGEMLVGQVLALMYLDPATLQHGGMATREALLQRLSGLLGTDVLVRTLNPRRRKYDERIAAETVRGKADEALRKLAELGFIDVVDAARLRLRPALMRFAEPVRGLTDPSDALERLVARGEVLLGDANDMDDDSGDAEGEEMSS
KB-PA_3-chr1	300786	305207	+	CDS	Chromosome partition protein MukB	atgagtcgaacgcgtgccgatgctttagccctggtcaattggaaaggtgtcttctacgagcgttatctactcgatcggcatgtcactgcgctggaaggcagcaacggtgccggcaagaccacggtgatgattgccgcctatgtcgctctgttgcccgatatgtcccgcctgcgcttcaccaatctcggcgagactggagcgactggcggcgacaagggtatttggggacgtctaggtgatcccggacgcccttcctacgtggtggtagattttgcccttgcaggtgcacagaggctgctggctggggtgcatctggaacgcaaaggtgaaccctccgtggagcctaccccatttattgtctggggcctcgaccctgcgatccgattgcaagatctgctg…	MSRTRADALALVNWKGVFYERYLLDRHVTALEGSNGAGKTTVMIAAYVALLPDMSRLRFTNLGETGATGGDKGIWGRLGDPGRPSYVVVDFALAGAQRLLAGVHLERKGEPSVEPTPFIVWGLDPAIRLQDLLLVAQGGVESVPELQELRDNAARLGGRLQSYPSAREYFAALFDQGVMPLRLGTDEERNKFNDMLRTSMTGGISRVLTSELRSFLLREQSGLADTLQRMRSNLDACRRTRVEVQESRRLEQEIGSIYEAGQAMFGAAFLATRERADELARRVSEAQSSRDQAFHAQEIAREALDATLTELDELDARKVELEPVLESARNWHSKLKDALAALCTLQQSVIRLAETEPEAQEAGRLRSEAETLRIRSREELKRAQEDYKRAAEGLADLQR…
KB-PA_3-chr1	305207	306193	+	CDS	hypothetical protein	atgtggcagacgccgcagcagcgcatcgctctgctcgagttgctggtgcaggggacgctcaagcggcgcgcctcacaggcgaaagcgtacgacactctggcagagctatcctggatccgcacgaccggtcggcgtgatcagattaccttggtagagactcgccgcactgaactcgttgcgctgcttgagcgggtatggccggactggcaggaagctctggcggcacttacagcgggtgggttttctcctacgcctgatggttgggctcgcttggaagattcgcgccgcgcagggcggcttccggcgctgccaggacgcctcaatcgccggactgcggccgcgctaaccgcgccccactccaaggcggtgctcacgccgcgccggcaagccatgcttgcc…	MWQTPQQRIALLELLVQGTLKRRASQAKAYDTLAELSWIRTTGRRDQITLVETRRTELVALLERVWPDWQEALAALTAGGFSPTPDGWARLEDSRRAGRLPALPGRLNRRTAAALTAPHSKAVLTPRRQAMLAGTEATHDGLLRLRPPRGLVAQTEQGVLDLWKLARFLGEAPIPERAFLDGLILEGPLRAVLLVENPGAWRDLPMLDGWLFAHVPGWDIATVVHLLAQVLPEIPVVHFGDLDPNGVRIFLKLRELRSDLCWFVPPFWAECVEPRKLKKPWPAGLDLRHAPKLVHDLVDKGLWLEQEPLVVDSRMRSALESIVQPLVN
KB-PA_3-chr1	306446	306216	-	CDS	hypothetical protein	gtggaggtcggattggcgttcggtaaagtcttgcgcaggcggcgtgtcgcagcaggatttacccaggaacaattggcccatgaggcagaattgcagcgtaattacgtcagcctgatggagcggggcgtcaaccagccaaccattaccaccttgctcaagctagccatccctctgggctgcacagcagcagaaatcgtcgacgaggtagaacaactcgttgcacactcctga	MEVGLAFGKVLRRRRVAAGFTQEQLAHEAELQRNYVSLMERGVNQPTITTLLKLAIPLGCTAAEIVDEVEQLVAHS
KB-PA_3-chr1	306895	307716	+	CDS	hypothetical protein	atgcgtttcataattaaactagcggcaacagtcgttgctggtgctctccttgccggttgcgggggcgaggatttcacaggcagctatcgcgctaagaacccgtcgaatagcaaagttgagctagtcctcaatatccacggcaatgaagctgagctcattgggcaggagctaggtactggccgcatcaagccgcttgtcaaaatgaccgtctctgtcaaagatggaaagcttcttcttgacgacgtaaatagttccgaacgcttggccatgaagcgcaatgtggacgagctgagccttgactgcctcaactgcaagattcttcgcatcgaggacgatacggtttggaaatatgaccccaaagggccttatgacgtagaccagatgctcaaagatcaggcc…	MRFIIKLAATVVAGALLAGCGGEDFTGSYRAKNPSNSKVELVLNIHGNEAELIGQELGTGRIKPLVKMTVSVKDGKLLLDDVNSSERLAMKRNVDELSLDCLNCKILRIEDDTVWKYDPKGPYDVDQMLKDQASRDEEELNAELAKIQEKALQQGMRDLEAPKLTPYEGDWVYQRTTKQDPLTIMTIWRKSQIKSWSFKFETMDRLGHEVPGFEVTEAGLKIGTGPKAHLYSLSPDKKTLTCMDCTKPERWLKADPNKDLSDRYYARQMAGNP
KB-PA_3-chr1	308051	307914	-	CDS	hypothetical protein	ttgggtacccattccggggagatcaagcggcagttcggctacaccaaggagcattcccgcggctttgccaagaacacctttcgcgggtcaaactgctcgccctatcgaacctgtggatggcccgccgacatttgctga	MGTHSGEIKRQFGYTKEHSRGFAKNTFRGSNCSPYRTCGWPADIC
KB-PA_3-chr1	308375	308563	+	CDS	hypothetical protein	atgttcaagctggctttgaaggaggccgcggagcatgagcaacggagcatggtgaacatgcttgaagtgctgctttgtgactactgtgatcgcaaaggtatcgtgttgccgaatcaaggagccagccagatgcctggtcaggagcgagtagcaactggccgtaaaaagaatgtgggggcagcggcatga	MFKLALKEAAEHEQRSMVNMLEVLLCDYCDRKGIVLPNQGASQMPGQERVATGRKKNVGAAA
KB-PA_3-chr1	308560	309654	+	CDS	Adenine-specific DNA methyltransferase	atgacctttcgctatatcggttctaaatccagactcatcgaccagattacagcctacatagggccacccagagagggtgccttttttgtggatgccttttgtggaactggtgtggtggctgaagccgcagcggagctcggttggagcgttcggcttaatgatagcttgcactcagcagtgatctctgcgggagcacgccttattagccatgaccaggcggcattccaatgtcttggaggatacgccgatgccattgccaagctgaacgcagctaggccgcggcatggattcatttggcgcacatatagccctgcttcggtcgattcgtgcggaattgagcgtaggtacttcaccaaagaaaatgcggctcgaattgacgctatgcgtggtttgattgcg…	MTFRYIGSKSRLIDQITAYIGPPREGAFFVDAFCGTGVVAEAAAELGWSVRLNDSLHSAVISAGARLISHDQAAFQCLGGYADAIAKLNAARPRHGFIWRTYSPASVDSCGIERRYFTKENAARIDAMRGLIAEWKEAGDIDEIEERLLIADLFGALNRVANIAGTFGCFLSKWTSQSQERITMRPRALKANSVHVEATVGDVFDVPNNTHDLVYLDPPYTKRQYASYYHILETVALGDEPEVEGVSGLRPWKMLASDFCYKTRALKTLSRLVQGLSAQKVLLSYSSEGHICMQDMKSELSKIGTSTMHPLGAIGRYRPNKVASNTASDVNEFLVIVERPVTQPLKPQQNVAKLNKPLLVESYA
KB-PA_3-chr1	309651	311876	+	CDS	hypothetical protein	atgagtgctccgcggcccgttgaagcggagtacctagccccagcagaaagcgcccttagcaaagccgctggccatggtcctgccagctttgagcttcgcctccaagtcttggaggctacctctgcacgttttggtgggtttgatttggaagcctttcataaggcattcggggtgcagagcaattactcagcagcagagcttttggaacttgcagcgccagttgcaggcgcgattgagtgctcccccgtccaccctgcaatggcattgagtgctttggcgcgtgaggccctgcacgaacaggaacgtaagagtacgggggcatatcacacggacttccgcttagccacaaggctggcacagcttgcagcccctaagctgactcataaaagtaaggttatc…	MSAPRPVEAEYLAPAESALSKAAGHGPASFELRLQVLEATSARFGGFDLEAFHKAFGVQSNYSAAELLELAAPVAGAIECSPVHPAMALSALAREALHEQERKSTGAYHTDFRLATRLAQLAAPKLTHKSKVIDPASGAGILLAALTHAVCGMDRAKVAHWLANGVCAADLSSNSLRAALLSLASFTDDVEALRAMRARWYCGDSLMADREVWTAMAPEGFDAVIGNPPWEKVKLSRHEFLKSAGAYRHYGAQIHGLDEERFALQREEVATYSRRLLARYPDLGMGEPDLYIAFTDLFFELCKEQGVVAALIPGGLIRSQGTQAMRQKIFEASQSVSLSIIDNRARFFAIDTRFKFLAVALVKAGSEKSKRDPIILLHERGTSTGLEKTGMATIGRAAL…
KB-PA_3-chr1	311833	312465	+	CDS	hypothetical protein	gtggcgaagaactcgaaaaagagggagttaaagtttatggctaatggaatggggcaggttgctcgtatcctttacaaggaaattgttgcgggagatcttcgaaagattcatgcagagtctaatgacgcagacactggaggtggcgcgcgagattttcggtttggttcctatccaagcatttcagcgattgttatgcgaatgtttccagatcaggtagtagaaaatcgccgcagaggtggtatgtcagtacctacgacaatctactctggtcaattctattggtatgaccaagctggcaatgtccgtagggctgtttcctattttgagcctcccaccgacgctaggcctaccgaaggaagaatcactcgggtgcatgaacaaccgtgcctttcaacagat…	MAKNSKKRELKFMANGMGQVARILYKEIVAGDLRKIHAESNDADTGGGARDFRFGSYPSISAIVMRMFPDQVVENRRRGGMSVPTTIYSGQFYWYDQAGNVRRAVSYFEPPTDARPTEGRITRVHEQPCLSTDLMPRPTAGNRVFLLLIQLLDDTVWPYYAEEQTLRTAGLWDPQVAQRMLQCIDAQRRADQAVIGFFDFLNGGSYCNGR
KB-PA_3-chr1	312455	313603	+	CDS	hypothetical protein	atggccgctagttattctgctgattgccaccatatactaagtcttctggcccgctctaggaatgtcttgctttctggtgcgccgggaacaggtaagtcaaagcttttagctgaggtagcattagcatttgaagccgctcttggtgtatcacctgttggtggggcgccaaaactcaacccatcgggacgtattcccattcctccggctgccgggagtgtaaaaaatatccccgcccccaccaagactgatcgcaaggtcttccggacagtgttccaccagaactccaaatatcgtgattttttatctggtatcacgcccgcggtaaacaaggtggcaggagcaccagatttcaatattgtaaagggtacactgtatcgggccagtgagcatgccaagtct…	MAASYSADCHHILSLLARSRNVLLSGAPGTGKSKLLAEVALAFEAALGVSPVGGAPKLNPSGRIPIPPAAGSVKNIPAPTKTDRKVFRTVFHQNSKYRDFLSGITPAVNKVAGAPDFNIVKGTLYRASEHAKSPNGAALLIIDEINRGPAVQVFGGAIVAIESDKRLAPDGNKRPETQFFELLDPTTGEVIPYALPHDLYILAAMNQADASVEPLDVAFLRRWEPLRLEPDEAILRAFYGLGAANSNALPDMPASVMDALEASVRAWVAVNEQIALGRGPEFQIGHGVLLSDMNIQTLSLPEVLSILCVGWAKVRAHVEEVFFGDIRGIAAALNALDGPAFNPFKLTETTFADDLRFRLEGPTNFTEGNIYTTLRAFAHPRG
KB-PA_3-chr1	313607	314911	+	CDS	hypothetical protein	gtggcgcacactcgaacacggttgtctctagttgagtacggagcgcctgttgacctgagtcgagaggtttcatcgaccattggaatagaccgtgcgaaggctaacaatcttttgattgaggctggaaaccgtattgcgtcaagcttgcgactcaactacaaccccataagcattgatgccaggggggcgagggccgtcgacttcgcaggtctcattcgtcttgctccttcgctagaacttgaagttgcacccaagttcttgggtcttgatgacgccgatgctgcgtggcgggaagatttcttttttctctctacactctcgcggcacggccgactgttggcttctgagagcctatctgcatcagggggaacttcgcgcgatctttctactttagtggct…	MAHTRTRLSLVEYGAPVDLSREVSSTIGIDRAKANNLLIEAGNRIASSLRLNYNPISIDARGARAVDFAGLIRLAPSLELEVAPKFLGLDDADAAWREDFFFLSTLSRHGRLLASESLSASGGTSRDLSTLVARSIIVMYEARKRRPLRSYRRVREADFFIDGDPDPVDLIFPSPDGFEQDLIRFDRNNGWNADIVAAAKELLSEVSDPSVVSSLVRLIEDLSPQNGPANRRRSIPARHRAWKPLHELSVDVLYGLGLNYKEGKASAPGYLVATWRIWEDLLAIALRLGFGRSVVVPQKGFPLGTKIRVNTGVRSTLSVFPDYVIESDGARPRMLLDAKYKGHVENGRIRISEADIYESLAFSRATACNFVVLAYPALPTEKPQPVGTCKVFEKIQVES…
KB-PA_3-chr1	315111	315293	+	CDS	hypothetical protein	atgagatggtttttcgtggtgatgctttgtggtggtgcaggcctctggctgagcgcccaatatcaaattccgcaatggttgctttggctgctgctggcgctgggaaccacgatatggggcctagccaagtggatggaacggcaggaggccaagacggagcgcagccatgatcgtgcacgctga	MRWFFVVMLCGGAGLWLSAQYQIPQWLLWLLLALGTTIWGLAKWMERQEAKTERSHDRAR
KB-PA_3-chr1	315452	315715	+	CDS	hypothetical protein	ttgacccttccttatgaaagaacccgcgccattgtcaaaaccgaggaattcctgcgtgagctatcccgtcatacgggattaccgcaggatatccgcagctatgcgaaaagcctgctcaggcactatccctctgcggcccaagttttctcgctgggacgccttgaggaatgcctggtgaacgaagcacttgaagtcgaataccgacaacgagtgatcgccttccaccagccattgctctgctcttcgctggattcgacacaatag	MTLPYERTRAIVKTEEFLRELSRHTGLPQDIRSYAKSLLRHYPSAAQVFSLGRLEECLVNEALEVEYRQRVIAFHQPLLCSSLDSTQ
KB-PA_3-chr1	315718	316320	+	CDS	hypothetical protein	atgccccgctcccattctgaacagtcggtatctcaactcgtcacgcagcgtgttaagcgtctgcgcagggggagacctttcagcatcaggtgtcttgcagagcttggttcgagctcggccatctccaaggcagtcgcccagctagttcgccgcggtgagcttttgcgcgtgtaccgtggtatctacatgcggccgaaattcagccaatacaccggccgtgttcgtcgtcctgggccttgggacttgttgagtctgattgccaggcagagtcgctggaagctgcaggttcacggtgctgatgcagtgaggcaattcgggctgagcacacaggtgccgatcattccgatttattacacgagcggccccagccgatcactatttgtcgggaaggcggaaatc…	MPRSHSEQSVSQLVTQRVKRLRRGRPFSIRCLAELGSSSAISKAVAQLVRRGELLRVYRGIYMRPKFSQYTGRVRRPGPWDLLSLIARQSRWKLQVHGADAVRQFGLSTQVPIIPIYYTSGPSRSLFVGKAEIRLVHAAPMVMQCAGTRVGVAISALYYLGRDGATQECIDAIKAALNPGELATLWDCDMPKWMRVALAE
KB-PA_3-chr1	316981	316406	-	CDS	hypothetical protein	atgggtgattggaaggcatgcatcggaaagatgagcgaccgcgaagtagcacggcgctttggtcttggagcgagtagtgtcaggcgttaccgccactcaatcggcattccagagtttcacccaagagacatcgagctgccgactgaattgattgcgcaactcgctacaagaacgaactatcaactggcacaagaattcggagtttcgatcaagcgcatcaagcgaaagcgaggtgagctgagaattcaggaacccaagactgtccgcgaacgcttcaaaccccttgaggacatctggaccaatgaagccattgccatgctcgggcagatgccggataccgaggtcgctgatcgtctggatatcagcaactttccagtcaaaaagaaacgtcacgagctt…	MGDWKACIGKMSDREVARRFGLGASSVRRYRHSIGIPEFHPRDIELPTELIAQLATRTNYQLAQEFGVSIKRIKRKRGELRIQEPKTVRERFKPLEDIWTNEAIAMLGQMPDTEVADRLDISNFPVKKKRHELGIQAYKRLVPEITPEIASAFGVVSDAELARQLGVSVNYIRKARIKASQRENADSLQSR
KB-PA_3-chr1	317852	320299	+	CDS	hypothetical protein	atgagtaagcactcggctctgctgctcctcgcctcggagcaggggcagtcacctcgaattattggcgaaatcctcaatctgctaggcgctcatcctgagctcattgacctgccacgcgccattgatcagcttctacgagttctccgcgcatgtaatgttggcatgccgattggttttgagaattctgatgtgctcgtgtggcgtgaggcatgcggatggatcgtctccctggcccgtaaaccaaatatccgagaacgtctaggctggcaattttggctagggaataaagggtcggcgaacaatcctgttctacataaaggcgtaaaaacattcggatttccatacgccacgttcctgcacatattcagagaccacgaaaacaaacagaactatgagcga…	MSKHSALLLLASEQGQSPRIIGEILNLLGAHPELIDLPRAIDQLLRVLRACNVGMPIGFENSDVLVWREACGWIVSLARKPNIRERLGWQFWLGNKGSANNPVLHKGVKTFGFPYATFLHIFRDHENKQNYERLLAQLLVASQKTATNRLLDQRYDVYKAIGHLCKLQIVSISSELNIRGTTEEFVASCRDFLPSKSKSANADSFAAIARFVRYCNGELPRVGGGGGGHRGKRKKQSLPELNHYISEDTRGFVLGDPDDPDQLPGHYDVIVGHADTAGEDLAPGEMSPATEIWVLDDDGCERPYVADLLGQQNVEAHIVRSRQFLPFSYNQLTLMELRNLLFGASDLFHSCLQELSCTKDSARIQLRMETIVALHISLWLGQSMTQVVQLSVVDDETDD…
KB-PA_3-chr1	320296	323427	+	CDS	hypothetical protein	atgaatctgccccgtctaagcgatcaacagggcagtgttatctggtcggctcggcctcatgagccggaatggatgcccgagatgcgggcgcttttgaaatcgattgccgagaagtccggtacggcgttcggcaaatggctgttgggtgaatgtgccatatccgggatctcgacgacgcacgtccgtgaactggaggcacagctcgggacaaatcacacgttgcgcaacgtacttcgcagcatcacccaacggataagagatcagattccagggtttccgctagcgcgaattgccattgccatccagcgagcagctaacccgatcaacccggacgactacacggtcaaacgagttcagcgcagcaatcaattggttcaagctgttcaactgggcctcaaa…	MNLPRLSDQQGSVIWSARPHEPEWMPEMRALLKSIAEKSGTAFGKWLLGECAISGISTTHVRELEAQLGTNHTLRNVLRSITQRIRDQIPGFPLARIAIAIQRAANPINPDDYTVKRVQRSNQLVQAVQLGLKLDLQALNSEERLGLLLLSAAYSGGLLDAAQLNAMLGTALDSIEWVAGVPEIRLPLSIRGKEAAEHRQWFPDPATLSLLVRCTDDIQESGGSIQRRNWHMRCVGAFLRFVGVPEQDQPKSLGETLDLLRMQMNLRLPQVLVNFSCRKEFVSQSLRPSSWGNIFGIDDFEDPAGSYDDKSVSDADKDIPGPPAWLQELRDRIRDNLPIEMPLQAESRGELPGLIQSWIAYMLGGASAYGHSIGRSTIDRYTRVLGAALTSLLDGISIF…
KB-PA_3-chr1	323657	323445	-	CDS	Transcriptional regulator, Xre family	atggtcaagtgccatttatctcgcctactcggtgagcggaaattgaagataagtgacgtggttagggacacggggatcaaccgcggaaccctcacgcggctctatcacgagaccgcgcaacgggtggagctcaaggacctggagacgatctgccagtacctgaactgtgaggtgggtgagttgctggaactgcaggatgatccggagggctga	MVKCHLSRLLGERKLKISDVVRDTGINRGTLTRLYHETAQRVELKDLETICQYLNCEVGELLELQDDPEG
KB-PA_3-chr1	323806	324039	+	CDS	Transcription-repair coupling factor (superfamily II helicase)	atgtctcacacctatctgaccaccgaggagctggccacgcgtatgaagtacgacgtgcgcaccatccgtaaccgcctgaaggactcggtactgctcgaaggcatccattacttccgcccgtttggtggtcgaaagatcctgttcatttgggaggccatcgaaaaggacatgcagaagcattcccgcacctccagtttgatacctatggccggcggaggcatttgccatgggtaa	MSHTYLTTEELATRMKYDVRTIRNRLKDSVLLEGIHYFRPFGGRKILFIWEAIEKDMQKHSRTSSLIPMAGGGICHG
KB-PA_3-chr1	324032	325192	+	CDS	Phage integrase	atgggtaagattcgtgcccgtgccgacaacgagaagttgttcttcgacttcacttatctggacaaacgctgccgtgagcaaaccacgttgcctgatacgccggccaaccgaaaaaagctggagaaaatccttgagcgtattgaggcagaaatcacgctgggaagcttcgactatgccacttactttccgcaaagcagcaaggttcaggagttcgcaagactgcgggctggctgcgcgatattgaagactccaccatttagggacttcgccgaacgctggttcgacgaaaagcgtgtggagtggcgcgacacacatacaacgacggtacgtcagacccttgataaatacctgctaccaacattcggcagacaagaagtcagcgccatcaccaaggcagaa…	MGKIRARADNEKLFFDFTYLDKRCREQTTLPDTPANRKKLEKILERIEAEITLGSFDYATYFPQSSKVQEFARLRAGCAILKTPPFRDFAERWFDEKRVEWRDTHTTTVRQTLDKYLLPTFGRQEVSAITKAEILSFRSALGKVPGLKGQALSATRINHIMTPLRMILSEAADRFEFTSPYLNIKSLKVPKTDVEPFTLDEVLQILGAVREDFRNYYTVRFFTGMRTGEVDGLQWKFVDFQRRQILIRETWVGGRLDYTKNDGSQREIDMSGPVYKALLDQQKKTGRGQFVFCSREGTPFSYRNINNRVWFPLLRHLGLRQRRPYQTRHTAATLWLAAGENPEWIARQMGHTTTEMLFRVYSRYVPNLTRRDGSAFDNLIQANLKD
KB-PA_3-chr1	325204	325488	+	CDS	Seryl-tRNA synthetase	atgaaattgatcaaccgcagcaacgtcacgcacctgcatccggcgatggaagctcgtgaacaccagtacttgaagcatttggcttctgccatgagccactacctcgagagccccaacggcaatgaactggtctgcatccttggctccggctacgagaagaacaaccgccaggcgctcgatacctgggtcgcctatcaccgtaatgaggtcttcgagaaacggttggaggggcgcagcccgctggacttcctgatcgaaaagctggagagcatgctcaacaactaa	MKLINRSNVTHLHPAMEAREHQYLKHLASAMSHYLESPNGNELVCILGSGYEKNNRQALDTWVAYHRNEVFEKRLEGRSPLDFLIEKLESMLNN
KB-PA_3-chr1	325857	325781	-	rna	tRNA-Arg-CCG	gcacctgtagctcagctggatagagtattgccctccgaaggcaagggtcgtgggttcgaatcccgccaggtgcgcca
Additonal Region 2
KB-PA_3-chr1	654574	652409	-	CDS	hypothetical protein	atgaaaacagtgagcatcgacctggaaaactgctacggcatcaagaagctgcaagctgaattcgacttttctaaagctaaggcctgtgccgtctatgcgccgaacggatctatgaaatcctcactcgcgcagactttccaagatgtcgcagacggcgtcgcctccaaggatcgcatcttcccggcgcgcgcgtgcaggcgcgaaatcaaggacgaagccggtgcggatctacccaaggaaggtgtactcgtcgttcgtccgtatgacgaggttctggggcactcaccgaagacttcaacgctgctggtcaaccctgcgctacgccaagaatacgaagccctccatgccgatatcgacgcggcaaaggagaccttgctgaaagctctcaaagagcagtct…	MKTVSIDLENCYGIKKLQAEFDFSKAKACAVYAPNGSMKSSLAQTFQDVADGVASKDRIFPARACRREIKDEAGADLPKEGVLVVRPYDEVLGHSPKTSTLLVNPALRQEYEALHADIDAAKETLLKALKEQSGSKRDIEKELSSTFTARDDQFYVALNRVKDEIASMPDAPLATVAYDVIFDDKVLALLATDEAKAAIQDYIKKYNELLTASTYFKKGTFNYYNAATVAKQLADNGFFEAKHSVTLNADAKLEITSQKELEELIAKEKDAISNDEDLKRKFAKLDKLIQKNVTVRDFEAYLLNHEELLVRLGNVPAFKEDVWKSYLKVRFEPFQDLLNKCQAAQTRRKEIEEQAAKERTQWEEVIDMFNDRFFVPFKLEAVNRLSVILGQEPMLSLGF…
KB-PA_3-chr1	658386	654571	-	CDS	hypothetical protein	atgaagggctcgaaacacggcgcctcacgcgcggggtcgcatgccgggcgtggctttcgataccaggatgccgccggcgtctggctggcaactcagtgctggagtgaggagctgccttacggcgaggtagtcccggaagggctggacgactacgagcttcgcggagcgacgcgctctgcccttgttcaggtgaaatcacgccgcgaccacctaggaccgttctcagccagcgaggcggcaaacttcgtgcgtgagctttggtatcgaagcgagggcgcatcctcgccccttaccggtgatttgatcttgcttgtagaacagccgatcgcaggtggccccaccaccgatcacaggctggccgataacccgagcctggccaaggccatggctagcgatcca…	MKGSKHGASRAGSHAGRGFRYQDAAGVWLATQCWSEELPYGEVVPEGLDDYELRGATRSALVQVKSRRDHLGPFSASEAANFVRELWYRSEGASSPLTGDLILLVEQPIAGGPTTDHRLADNPSLAKAMASDPRWSSLAPRTLVWITPAPFEVALRSISRITSCTPLAAQVHYAELLSRIGNLADANGLITDNRYAGLAVSDVEACVRRIEPILDLSGMEAALRDGLCEALDFLTPTDDPSFYQGVNTRPGHLAAGLVAERPETRSIVLDALEASGATLIVGQSGSGKSALMWEVARAIRHTVRWFEIKRGDAADAHLFMRLAQALRASPTAPLGFILDDVGRGGSSLWDGLSKEVGGGSGILLLGSIREEDVFMLTARARAKEVRPPVEEAVAERIWH…
KB-PA_3-chr1	659275	658505	-	CDS	hypothetical protein	atggattacagcccgatagtcgtccaggtctggggcatgctgacctggtttatcccggcagccctgctgatcggcctgctcaaatcgccttgggccaaggggcaggtcggtgaactgctggtgcgactgttcgcccattggcaactggacaggcaaacctaccgccgcctgcacaacgtcaccctgaacacgccggacggcacgacacagatcgaccacgtattcctctccccctacggcatcttcgtgctggaaacgaagaacatgagcggctggattttcggcagcgagaagcaagcgcagtggacgcagaagctctacaagcgcacgttcaaattccagaacccgctgcgacagaactacaagcacctcaaagccctggaagccacccttggcgtt…	MDYSPIVVQVWGMLTWFIPAALLIGLLKSPWAKGQVGELLVRLFAHWQLDRQTYRRLHNVTLNTPDGTTQIDHVFLSPYGIFVLETKNMSGWIFGSEKQAQWTQKLYKRTFKFQNPLRQNYKHLKALEATLGVNPEHLHSVITFVGGSTFKTEVPANVTQGIGFIRYIQSFQQAVFSEAEVGAMLQSLQTGRRAPTLATHREHVQNLKRRSDPTAERQCPKCGSALLIRTVKSGAKAGQQFWGCSAFPKCRTLQSL
KB-PA_3-chr1	660567	659446	-	CDS	Fic domain protein, PA0574 type	atgaacgacccactctggatctggcagcagcccgactggccgcagttcaactggcaagccgaagcgcttgcaccactgctgcgctcctgtagccaggctcagggtcgtttgttaggaatgctcggtgctgtggggagtgacaccgaagtgcagagcagcctggatgccatgctgcagaacatcgtcacctcttcagccattgagggagagcaactgaatgtcggttcggtgcgctcatcactggcacggcgactgggattgcacgaagaaggtcgaaccacctctcgctccgaaggcctggcggaactgctgctcgatgccacccacgcacatcaagagccgctagacgaacagcgactgttcacctggcaccgttggctattccccactgatgagcaa…	MNDPLWIWQQPDWPQFNWQAEALAPLLRSCSQAQGRLLGMLGAVGSDTEVQSSLDAMLQNIVTSSAIEGEQLNVGSVRSSLARRLGLHEEGRTTSRSEGLAELLLDATHAHQEPLDEQRLFTWHRWLFPTDEQLLTRPLHIGALRGEEPMQVVSGRIDRPTVHFEAPPRAGLEAQLADFLAWFESSRRDASLDPFLRAGIAHFWFVTLHPFDDGNGRLTRAITDLALAQGEQQAIRFYAMSASILDDRAGYYRILEASQKSTLDITNWLQWFLATLLNSLEQALARIDRVLVKARFWQAHRSQTLSAEQVKVLNRLLDGGERGFEEGISAAQYQAVAKVSKATATRHLSDLLEKGCIERLPGRGRSTRYQIAR
KB-PA_3-chr1	660963	660826	-	CDS	Shufflon-specific DNA recombinase	gtgggccgcaaaacggattggccgaccaacgaaaaaaccttccgcaccaagcgcgacgccgaagactgggcacgccgcaccgaagacgagatggtacgcggcgtgtacatccagcactgcggctccgagcgcatgtga	MGRKTDWPTNEKTFRTKRDAEDWARRTEDEMVRGVYIQHCGSERM
KB-PA_3-chr1	661287	661447	+	repeat	repeat region	acctgcttcattccttcacaattcctttcacagtgtgaaacggctcctgggctctccaggcccagcaggggcgcgtcctgggagcctggtttcatctcactccgggtttcacgatttccacgacacacggctcgtcggcgggagggggataagtgcgtttt
KB-PA_3-chr1	661548	662315	+	CDS	hypothetical protein	atgcctgtttgtaatttgtgcctaaaggaaagtgagctttctcagtcccatattatccctagggcttttttaaaaaggcttaagaagaactcgccgcagcttataaaaattcgggatgctccgggggttaagccagtaaaagaaaatgctgactggaaggaaaggctgttgtgtggtgagtgtgaagtgtttattaataagagttatgagcacgggcagattttgtttcttaggggaaggggtaatgtttctaaaagtcatgataaaataacttttagaaattttgactttgaaaaattttatctatttctgctttcgatcctctggcgtgcttcgatctcaagtcatgaggcgtttgaggttgtaaagcttcctccggaactacaaaatgtcttccga…	MPVCNLCLKESELSQSHIIPRAFLKRLKKNSPQLIKIRDAPGVKPVKENADWKERLLCGECEVFINKSYEHGQILFLRGRGNVSKSHDKITFRNFDFEKFYLFLLSILWRASISSHEAFEVVKLPPELQNVFRLALLNREDKINNSVRISDVLKIGIVRITNRPYMTEEETKSIISHFNLRHSEEGHIYYFMVEGFLVSYCWPKTSKSEFPRDLGVFKDSFFLRMPKIQVEKSAVLAEMYNGMISKAIEFSTELW
KB-PA_3-chr1	662320	683298	+	repeat	repeat region	agcccgccatctagtgggcttttgctatgcggtgatcggcttcagtttcgcggccaggttggccgcctgggccgcgtcggcggtgaagtcgcctgcgttcgtggggggccctgcaggcgggtggacgtgcccggccagttgggtgttcatctgctccaccaggtcgagcaggtcgcacagcacttgcaggacgttcacgcccgcggatccgacccaggtcgtcggcgcctgcaggcgctgggcgacggccgccacgctccggcgcattccctggatacgttcgtccatgtcggcgccgatggtggcgttgtagctctggccggcgaccaggttgaggtcgcggccggtgcccaggtgcaggtcgtccacagcggccaggcttgcggatccgccggataa…
KB-PA_3-chr1	663315	662344	-	CDS	hypothetical protein	atggaagaagccgtaacccgcatcgtagagcgtcaattccccgaactctccggcggctaccacctgccgcgcttcgcccgcgtcaccgccgtggcggatccgccggcggcaaacgggatctgcgacgagtttcgcccgcgctacgccgtagacctggaggtcctggacgccaacggcgagcccgacccgacattaccgcccatgcctggcgtaccgctgcccctgcccaacggcggcggcgaacgcgggttcctggcgttccccgaggaaggcaccatggtggtgctgggtttcgcctacggcatgccgaacaagccgttcattttgcagatcctgcctcacggccagagcctgccgaagctgccgaaagaggatcagctgtggcagcacagcgaagcc…	MEEAVTRIVERQFPELSGGYHLPRFARVTAVADPPAANGICDEFRPRYAVDLEVLDANGEPDPTLPPMPGVPLPLPNGGGERGFLAFPEEGTMVVLGFAYGMPNKPFILQILPHGQSLPKLPKEDQLWQHSEAALQRVDGAGNWTRQTDGRIRDQAMEREVEALENVERYQGSRVEIEDHATEQVGGVKRIEALGALKLLSGGSASLAAVDDLHLGTGRDLNLVAGQSYNATIGADMDERIQGMRRSVAAVAQRLQAPTTWVGSAGVNVLQVLCDLLDLVEQMNTQLAGHVHPPAGPPTNAGDFTADAAQAANLAAKLKPITA
KB-PA_3-chr1	663992	663300	-	CDS	FIG00961033: hypothetical protein	atgaaacttcaccaggtgctcaccatcaacggcaaagccgtgccgctggtccaggacgaagtccgcctggatctgcgcacgcctgggcgggcgtcgttcaccatcaaggcggcggagccggtacgcggcctggtcgccctggacattggctacaacgaccgcccgctgcagcggcacttcctgggctacgtcgagcgctgcagcgcggcgaacgcgacggaacaggtcctgttctgccgcgagctggccgccgtgttggcccagcccctgcccatggggctacgccatgtggatctgcgcgaggttctggaggacgtgtgccgccagaccgggctttcgttccgcgtccccgacgccgactactccaggacgaaggccccttacttctactcgctcgcc…	MKLHQVLTINGKAVPLVQDEVRLDLRTPGRASFTIKAAEPVRGLVALDIGYNDRPLQRHFLGYVERCSAANATEQVLFCRELAAVLAQPLPMGLRHVDLREVLEDVCRQTGLSFRVPDADYSRTKAPYFYSLAAGYQAMDSLAQVFQIPDFVWHQQGNGEVYAGSWTDSYWGARAPIQLEAELFDSYQGRQSAVIAALPGIRPGATINQGERITSVTLTGTQMAIKWKKP
KB-PA_3-chr1	664531	663992	-	CDS	hypothetical protein	atgacgctgctcctcgatggccagcaggtccatggaaagggcctgcaggtgacggccaatctgcggatcgaaagcgctgacctgtccgggcagaccagcaacacggccaaggcgcacaagggcttcaagcccaaggggctgaccgtcagcctgatgattccctacgtggaccaggtgcacctggtcgagctggtgcggatggccgaggcgaccgccggcggcggccagttgcacacctatcgggtggtgaaccagacagcggccgcgttcggcgtgcgccaggttcagttcagcgacaacctcagtgtccgggaagatgacattctgcgggcctggcggatccagttcaccctgaccgagcagctgtccaaccccgagcgcgtggagacgcgccggccc…	MTLLLDGQQVHGKGLQVTANLRIESADLSGQTSNTAKAHKGFKPKGLTVSLMIPYVDQVHLVELVRMAEATAGGGQLHTYRVVNQTAAAFGVRQVQFSDNLSVREDDILRAWRIQFTLTEQLSNPERVETRRPGKPVQQQVGAGAPVADPAAGGDGKPGQELTGFEKILQRVDDAIGGA
KB-PA_3-chr1	665448	664528	-	CDS	hypothetical protein	atgacatgggcacccgtcaccatgcgctggcccgcacagacgacccgctggctggacgacctgggcgcggcccagcagctcgccagcggcgagctggcgggcaccgccgagcgcctgcgcgggctccaggacctggccaccaccaacccggggccggtcgccggcgccgccaaggcggccatcacagccgggcgcagcgccatggccagcacactgggcgaggtaccggcgtgcctcgcggtaacgccgttcctcgccggcgtcggccaaggccagggcaaccagcgattcctgtccgcgccgaacctgctgcagcaactggccgacaagctgctgcagccgcagcgcgacgaccaggaacagtacgccctggtcctgctgttcctcggcacccgctac…	MTWAPVTMRWPAQTTRWLDDLGAAQQLASGELAGTAERLRGLQDLATTNPGPVAGAAKAAITAGRSAMASTLGEVPACLAVTPFLAGVGQGQGNQRFLSAPNLLQQLADKLLQPQRDDQEQYALVLLFLGTRYDQLAATLARFNALLPVPDLQRAERRAASLARLELEKWIMPRTTPGPRWQDLPLDRCTITRAAQQSLSGQLAVLEGYTADSSPMAELGALAQRKQALQASKDNALQALREQLANGVADGTMQARLVGPGNAVELRRQLLQGEAPGHEWVLCAGLALVGSLSGLAFVRELVGLDP
KB-PA_3-chr1	666155	665445	-	CDS	hypothetical protein	atgaccaccctgaccgtttaccaaaccaacgccctgggcctgtacgtcggccccaccgacgccgatgaatcgcctctggagcccggcgtgttcctgattcccgccggttgcgtgcaactggccccaccgaaggagccgaagggcaagcgcgcacgctggacgggatccgactgggagctggtggactggctcgacggcgtgaccacctacagcacccgcgacggctcgcccctggtgctgcagggcctggaaccgctccccgagggctacaccctgcagcagcccgggccgaaccaggtctggaaggacggcgcttgggtagacgatctgcccggcctgctcgccgccgcccacaagcggaagaccctggagatccgcgccgccggccaggcgttcctg…	MTTLTVYQTNALGLYVGPTDADESPLEPGVFLIPAGCVQLAPPKEPKGKRARWTGSDWELVDWLDGVTTYSTRDGSPLVLQGLEPLPEGYTLQQPGPNQVWKDGAWVDDLPGLLAAAHKRKTLEIRAAGQAFLDGGFYSSALGNPHFYASSLSDQMNVTSLAALGISADYPCAAGGEQNREWRRHTANQLRQVGVDLVQHRQAGQQQVERLQDELDAALAAQDLERLEAITWSIPA
KB-PA_3-chr1	668133	666169	-	CDS	Phage tail fiber protein GpH	atggcacgcattaccgccgccggcgaacgcttgattgcccagaagctgggcgaaaagaagattctggaggtcagccgcttcgtgctcgccctggtccccgggctggatcccaccagccctgtggatcgcgacgcggccctgccgccggcgcagcagatcgtccacactgcgcccgtcacccaggccggctacgtcaaccccaaccaggtggtttacagcctcatgatgggttcggacgtgggcgacttcgactggaactggatcggcctggagacggcggaaaaggtcctgctggcggtcgcatacgtgcctgtccagcagaagcgcaagaaccgcccgccgctgcagatcggcaacaacgtgacgcgcaacttcctggtggcgttcgacggcgcccag…	MARITAAGERLIAQKLGEKKILEVSRFVLALVPGLDPTSPVDRDAALPPAQQIVHTAPVTQAGYVNPNQVVYSLMMGSDVGDFDWNWIGLETAEKVLLAVAYVPVQQKRKNRPPLQIGNNVTRNFLVAFDGAQELTGITIDASTWQHDFTVRLAGIDERERLANRDMFGRATFFSTGLLLEKASTNYRLKAGLAYVEGIRVHAPEDVSIAAPSLPNTAWLDVRLQRSQSDVVASWSIAWGTNQTDYTDSAGVRHYLVPLADLDAGGNLVADRRLPKPITGPLVDHWAAQVGDYPKLRARATTKTDVGLDKIPNAISDDPALDRGDVLATTKATRAVQLRAAQDLDDLAKSLGTAARRDVGTDAGDLLEVGAFGWGTNDSPVAASVNIYESSVTKFTPAT…
KB-PA_3-chr1	668669	668145	-	CDS	Phage tail formation protein GpI	atgattaagctgcacttgcccttctggctggacggccccgagctggccaagctgcgccgcgccgcgcaggcttggtgggagcgggccgagggctggctgcgctggccgctgctgcagctcgacgcggaaacctgccacctcacgatcctggatctgctcgcctggcagcgggatatcagccggtttcgcggcgagccggaacccctctaccggctgcgcgtgaagcacgcattcgtcaacgccgtggatgccggctccgtcgctggcgtgaagcggatcctgcagcgcctcggcgtcggctatgtcgagatcgaggagcgcatgcccggtcgggactgggacgtcgtgctgctgacgctgaccgactcgcagttgtccgcgaatcccgagctgttgcgc…	MIKLHLPFWLDGPELAKLRRAAQAWWERAEGWLRWPLLQLDAETCHLTILDLLAWQRDISRFRGEPEPLYRLRVKHAFVNAVDAGSVAGVKRILQRLGVGYVEIEERMPGRDWDVVLLTLTDSQLSANPELLRVLVQQYGRTCRRYDFQTITPVTLHVVAVDFNDDQQTLVATL
KB-PA_3-chr1	669834	668662	-	CDS	Phage protein	gtgactgtagatttcaaggccgcactgcgcgatgccggcatccccaccaccgaagccgagctgcgcaaggcgtgggaaaaggaagtcgaggcccagggctcgctgttgtccaacaccagcgcctattcgccgttctggcgcatcgtcaccgcgctggtgacgaagccggtcctggccctgctggagttcgtcgccggcaccgtgctgccgaacttctttgttcagactgccggcggcgcctggctcgacatgctggcctgggcagtggacgtcgagcgcaagccggcgacccgcgccctgggctcgctgctgttcacccgcgccgcgccggccagcacgctggaagtgcccgccggcacgcgggtgcaatccgccgcgatcaacggccacgtctacgag…	MTVDFKAALRDAGIPTTEAELRKAWEKEVEAQGSLLSNTSAYSPFWRIVTALVTKPVLALLEFVAGTVLPNFFVQTAGGAWLDMLAWAVDVERKPATRALGSLLFTRAAPASTLEVPAGTRVQSAAINGHVYELETTQPGLFNDGQTQVAIPVQAVEPGSGFNLAPGYYAILPVPVPGIVQVVNPDGWLTQPGADSEPDSQLRLRVRNQFSAVNQYHTDAVYRAMISGFQGVRPDGVYFEHGAPRGPGSANAFVLFDAGVPADEYLQQINAYIRDQGNHGHGDDLQVFVMPETLHQVRVEIWPRANLSIEQRAELKTQVEQFIRAAFRESTASDYQPTLTYPQSRFSFSRLAEELHEQFPRLESLHFDNTDILSQLNIPRLQSLQVVAHD
KB-PA_3-chr1	670151	669831	-	CDS	Phage protein	atgactgccctttatatcgatctcctgatcgtcggcaacgacctggacctggacccgtcccaccagccgcggctggtcgacgaccgggccagcatcgctcaggacatcgcccacctgatccgcgaaagcggcctgctggtcacgctggtcgccgagcgcagccggctaaggcagcgtgactgtatccagcagctggaactgctggtggagtccgacgaacgcctggtgccgggcacagtacggattatcgaagaggggccgggccgctacctggtcacggccaccactgttgaattcggcgcaatcgaggtaacgctgtga	MTALYIDLLIVGNDLDLDPSHQPRLVDDRASIAQDIAHLIRESGLLVTLVAERSRLRQRDCIQQLELLVESDERLVPGTVRIIEEGPGRYLVTATTVEFGAIEVTL
KB-PA_3-chr1	672202	670148	-	CDS	hypothetical protein	atgagcaccaagagcaccgcgaaactcgactttgtgctacgcctgatcgaccaggtgacggccccggccgcgaaggtcagcaagagcctgatggacgtggccgaggtcggcaaacgggggttcatgcaggtgggcgccggcatcgccggcgtggtcggctcgctgatggcattccggcaatcgctcgccccggcgcttgagcagaccggcgccctgggcgagatccagtccctgggcgtcgcccaggacgccctggacgagctgaaccaggcgtcgatggagttcgccgcgaactacggcgaacacgcctcggcgttcgtgcgctcggcctaccaggtagaaggcgcgatcaagggcctggtgggcagcgagttggccagcatcaccagcgcgtccaac…	MSTKSTAKLDFVLRLIDQVTAPAAKVSKSLMDVAEVGKRGFMQVGAGIAGVVGSLMAFRQSLAPALEQTGALGEIQSLGVAQDALDELNQASMEFAANYGEHASAFVRSAYQVEGAIKGLVGSELASITSASNVLAKATKADADTMTTYIGTMYGLFQGQADAMGRAKWVEQLTGQTARAVQLFRTSGAQMNDAFKAVGIGASAAGADLVEQMAVLGTLSQTMEGGEAGGLYKAFFENVSAAQDKLGMKFTDAGGRLLPIMQILDKLQVKFGQLTKQSDLDAITGAFGGEAARMIVTLLKDTGALANNLDQLGKVKGMERAEQMARAMVDPWQQLDSVIENIRISFGMVLLPVLNPLIEGLRDAGNTFQRWLVMFPNIARWLGYITLGVLGLVAAAGML…
KB-PA_3-chr1	672357	672217	-	CDS	hypothetical protein	atggccctggccgagcgctggctacctggcgccgcgcccacggcagacaacctgggcacggccaagtggctggaggacgagcactggcggcggatggaaatcgccgtggcaaacggcatcgccaaggccctgaaaggctga	MALAERWLPGAAPTADNLGTAKWLEDEHWRRMEIAVANGIAKALKG
KB-PA_3-chr1	672668	672381	-	CDS	FIG00958915: hypothetical protein	atgaccgaacgcaccgaaatcaccctggagatccaggacaccgaattcctgttcaccctgaccccggcggacgtgacccgctatttcaacgccgtgacccagaacaacaaggtcgcgccgtcgaacaacctcctgcgcagcaccgtcaagcaggagcaactggcgtccctgcgcccgcacctggccaaccccatgacggtcatgaagctcgccggcgcgctcctcgaggagtacgcccccgacgttgaagtcaccgtaaaaaagcgctcgaccgagccgagcgactga	MTERTEITLEIQDTEFLFTLTPADVTRYFNAVTQNNKVAPSNNLLRSTVKQEQLASLRPHLANPMTVMKLAGALLEEYAPDVEVTVKKRSTEPSD
KB-PA_3-chr1	673150	672665	-	CDS	Endopeptidase (EC 3.4.-.-)	atgagccgcgtcctactcgccctggtcgcctgccttgtcgcgctgctgatcgagcgcggctgtctgcagcgcaccaacgaccgggcatcccgcgacctgcaggacgcccgccgcgaggtcgccgggctgcagcaggccgcgcaggtcgccggcgagctgctggccgcccgcgatgccctcgacctcaagcacacccaggaactgaacgatgaacgcaacgcgaacgagcgcctgcgcgctgctgttgacgctggccgtcagcggctgcacgtcaaggccacctgccccgcccctgtgcccaccgatgccggcgccgccggcctggctgctgcaggagccgccgaactcgatagaacggctcgacaggattattacgccctccgcgacgatctcgccctg…	MSRVLLALVACLVALLIERGCLQRTNDRASRDLQDARREVAGLQQAAQVAGELLAARDALDLKHTQELNDERNANERLRAAVDAGRQRLHVKATCPAPVPTDAGAAGLAAAGAAELDRTARQDYYALRDDLALTRRMVLALQDYARSCSRSFSTQPQGSTQ
KB-PA_3-chr1	673608	673147	-	CDS	Phage lysozyme R (EC 3.2.1.17)	atgaagctgccgcccaagctggccgccggcggcggcgtgctggcactggccgccgccctggttgcgccgttcgaggggcgttcgctggtcgcctacctggacccagtgggaatcccgacgatctgcgagggcatcaccgccggcgtgcgcatgggcgacagggcgaccccggccgagtgcgatgcactgcttgaacgcgagctgcagcgcgccgtcgatgccgtggaccgccaggtcctggtgccgctgcccgacacccgccgcgccgccctgggctcgttcgtctacaacgtcggcgaaggccagctggcccgctcgacgctgctgcgcaagctcaacgccggcgacgtgcgcggcgcctgcgccgagctgtcgcgctgggtctacgccggcgggaag…	MKLPPKLAAGGGVLALAAALVAPFEGRSLVAYLDPVGIPTICEGITAGVRMGDRATPAECDALLERELQRAVDAVDRQVLVPLPDTRRAALGSFVYNVGEGQLARSTLLRKLNAGDVRGACAELSRWVYAGGKKLGGLVRRRAAERELCEIGL
KB-PA_3-chr1	673910	673605	-	CDS	hypothetical protein	atgggcaaccgcactacgcctgccggccgcctcggcaaactggagcgtgacatggccgtcatcgatcaccgcctgaccgacgtcgagcgcctgaaccgcgacgtaccgccccggctgacccgcctggaacaacagttcgagcacgtcaccgaccagctcgacgaactgaaccagggccagcagaaactggccgtcaccgtagacggcctgggccggaagatcgcctgggcactgggcgtcgccagcgcgctgtgggccgttatccagatggtcgcaccacacctactgcgcggggtgatgccatga	MGNRTTPAGRLGKLERDMAVIDHRLTDVERLNRDVPPRLTRLEQQFEHVTDQLDELNQGQQKLAVTVDGLGRKIAWALGVASALWAVIQMVAPHLLRGVMP
KB-PA_3-chr1	674119	673910	-	CDS	Hypothetical Zinc-finger containing protein	atggccgactgtttcgaccgcgcccaggcccgcgagctgcaggaccgcgaactggccctgcaggcgcaccaggtgcgcgtccggcccagcgggccgagcctgacccactgccaggactgtggcgagcagatccccgaggcgcgccgcgccctgggcgggatcatccgctgcacgccgtgccaggcccgtttcgagaaagggggccgctga	MADCFDRAQARELQDRELALQAHQVRVRPSGPSLTHCQDCGEQIPEARRALGGIIRCTPCQARFEKGGR
KB-PA_3-chr1	674568	674119	-	CDS	Phage protein	gtggctcgcatttccggaatgaacttcgatatcaccctgggggacctgcaggtccacgtcgagaaagcgaccctggatatcaccgacaacagcgcggtagcccagacccgtggcgtgccggatggattcgtagacggcgacgtgaccgccagcggcgaatacgaactggacgccgcgaacttcgccctgctgatcgaggcggccaagcgcgccggcagtttccgcaagctggagccggtcgattccctcttttacgccaaggcgggcgacagcgaagtccgcgtagaggccttcggctgcaagctgaaggtttccagcctgctggatatcgaccccaagggcggcagcaagaccacccacaaggtgcccttcgacgtcaccagccccgacttcatccgc…	MARISGMNFDITLGDLQVHVEKATLDITDNSAVAQTRGVPDGFVDGDVTASGEYELDAANFALLIEAAKRAGSFRKLEPVDSLFYAKAGDSEVRVEAFGCKLKVSSLLDIDPKGGSKTTHKVPFDVTSPDFIRINGVPYLDASETEDLR
KB-PA_3-chr1	675687	674572	-	CDS	Phage protein	atggctctaggcagcgtcagcgtcaataacctcaacctcggccaaggcccggtgacggctatagaacgctatttccttttcatcggcccggcgtcgaagaacgtcggcaaattcctggccctcaacacccagtccgacctggacgttcagttggggatcccggacgcggacctgaaacgccagatcgcggccgcacgcgccaacggtggcccgcgctgggcgtgcatggcggcgcccatcggcgccgacggccgctggcaggacgccctggccgccgcgcaacagcagggcgtgtcggtcgaggcggtggtcatcacccgtccggtggccaccgccgccgagctgcaggagatgcacgccgccgctgtggagctgagcaaccgctacggccgccgcgtg…	MALGSVSVNNLNLGQGPVTAIERYFLFIGPASKNVGKFLALNTQSDLDVQLGIPDADLKRQIAAARANGGPRWACMAAPIGADGRWQDALAAAQQQGVSVEAVVITRPVATAAELQEMHAAAVELSNRYGRRVFVMAAVAGLVEGQDWATYLSQARALVADLAAPRVLCVPQLHGNNLGVLAGRLATDEASIADSPMRVPTGAVLALGETPKDKDGVPLDMATLAELDKARYSVPQTYPDYPGVFWGDGNMLDAPGSDFNVVENLRVADKAARRVRILLIQRVADRRVNNTPASMAATASALMRPLREMSRSTTFAGLVFPGEIQPPLDGDVVLTWKSRTEIEAFIRVRPYNCPKTLTANIALDLSGGDEE
KB-PA_3-chr1	676364	675699	-	CDS	FIG00956269: hypothetical protein	atggctgagccgctgaatctcgacctgcgcggcctgctcggcgtgcgtgcccagctggcgctggcgacgctgccgccgcagctgcgccggcgtctgctgaacaacgcgctcaagcgcgtccgcgtccaggcccggcgcaacgtgtccggccaggccagcccggacggcgcgccgttcccgccgcgcaagcgcaagggccgccgcaagatgcttgcgggcctggtcaagcccaagcacctgaacgtcacccaactgaacgccgaccagggcgtcctgggctggcggaacggcctgatgggccatatcgccgggcagcaccaggacggctacaccgagcgccgcaccgccgcgcagatgcgccgctggaaccgcgtccagccgaaccaagcatgcaccgag…	MAEPLNLDLRGLLGVRAQLALATLPPQLRRRLLNNALKRVRVQARRNVSGQASPDGAPFPPRKRKGRRKMLAGLVKPKHLNVTQLNADQGVLGWRNGLMGHIAGQHQDGYTERRTAAQMRRWNRVQPNQACTEKQAKRLRRLGFRVRQAGKRGLSRPSVPWIQEHVGFLQAGLLIRVLRDEQPGPQSWEITLPKRTFLGITQDETGRLVAQLLEQILNSPR
KB-PA_3-chr1	676794	676357	-	CDS	FIG00955159: hypothetical protein	atgaacaagctgcgcgccctgaccgcctacctgatcgaccgccaactggtgcccgccgagcagttggacagcttcgccgaacaggtgagcctgaccctggtctggaagcctgaacgcgaaggcctgcgcctgggcgacatgcgctatcgcgcagtcgtcctcctggagcgcctggccgaccaccccgcacgcctgatggcactggtcggcagttggcttgagaacaacgaccccgaccgcgacggcctgccggatccggtgttcgacgtcgagcagatggaccgcgacctggccgacgtcgagctggccgtggagttcgtcgagccggtccacctggcagaggattccgccggcgagatcgaggcgttcggccggcgctgggcgttcgtgccgttcgat…	MNKLRALTAYLIDRQLVPAEQLDSFAEQVSLTLVWKPEREGLRLGDMRYRAVVLLERLADHPARLMALVGSWLENNDPDRDGLPDPVFDVEQMDRDLADVELAVEFVEPVHLAEDSAGEIEAFGRRWAFVPFDLWIAEHGEVRHG
KB-PA_3-chr1	677257	676796	-	CDS	Probable head completion/stabilization protein	atgagcttttccggcaaacccaccaacgtgatccagcaggccatccccaacgacggcttctggccagacctggacgtcgccgagttccagcgcctgtaccggatgccggcggaatacctgctggatctgctggtggacggcgtgaccaccgcccgggccgaggtgaaccaggacctggccaagcgcaagcgcgcctggcagaccgccggggtcactcggctggaaaccgcagatccgcaggtgctgccggatcgcgccgagtacgtggcgcactacaagcgcgccgtctactgccgcgccaaggctcagctgctgggccagttcgcaacggtcaaccgccgtcccgaagccgagaacctggcgaaagaagccgaacagacccgcgagctgttcctttcg…	MSFSGKPTNVIQQAIPNDGFWPDLDVAEFQRLYRMPAEYLLDLLVDGVTTARAEVNQDLAKRKRAWQTAGVTRLETADPQVLPDRAEYVAHYKRAVYCRAKAQLLGQFATVNRRPEAENLAKEAEQTRELFLSYSQQAVRLIQGRSRITAELI
KB-PA_3-chr1	678092	677355	-	CDS	Phage terminase, endonuclease subunit GpM	gtgagcctggccctggcccacaagcgccggattctggccgagggcgtggcggctggtgccgccaccgtcccggcctacaacccgagcgaggccctgaacagcccagcgaacgcgcagaagcacctggccctgatgctgaccgccctggatggcgacctggagcgcatcagcgcgatcaacagccgcgaggaacgccagcgcctgaagcgcgacgagctgctgcccaagtatctggactatgtgcagcgctaccgcgccgccgggctttcctacccgaacccggtcctggtccaggtgctggtctggctgttcgacactgtgcagttcgaagccggcctggaactggccctgttcgccatcggggatggccaggagatgcccgagcggttcaagcgccgc…	MSLALAHKRRILAEGVAAGAATVPAYNPSEALNSPANAQKHLALMLTALDGDLERISAINSREERQRLKRDELLPKYLDYVQRYRAAGLSYPNPVLVQVLVWLFDTVQFEAGLELALFAIGDGQEMPERFKRRDVQTFVADEVIDWAEAEYKAGRAPEPYVSNLLPLVDGQWQLFERIPARYHKLLGQLAMDNEEWAQAIEHLDRAVALYPEIGVGTRRAAAAKALTKAEAAKQSDEGDEPPPTS
KB-PA_3-chr1	679111	678089	-	CDS	Phage major capsid protein GpN	atgggagccctcagcgaacgcgcccaggcgcagtaccagcaactccaagaggacatggccgaggcctataacgtccacgacaccgcccgcaccttcgcagtggagcccacccacgcccaggaactcaacgaccagatcaccgagcgcgccgacttcctcggtcgcatcaacgtcgtcccggtcagcgagatcaagggcgaaaaggttctgctgggcctgaacggacctgcgtcgagccgcaccgacaccagcaccaaggaccgcgagccccgcgacctgctggacctgaagaacaacgaatacgaactcttccacaccgaaacggacgtggccctgaagttcgccaccatcgacagctgggcgaagttcccggactttgccgaccgctacctggcggcg…	MGALSERAQAQYQQLQEDMAEAYNVHDTARTFAVEPTHAQELNDQITERADFLGRINVVPVSEIKGEKVLLGLNGPASSRTDTSTKDREPRDLLDLKNNEYELFHTETDVALKFATIDSWAKFPDFADRYLAAVQRRIALDRILIGFHGTHAAKQTDLQQFPMLQDVNKGWLQLARELIPEQVLKSADPAKKIVIGKGGDYANLDAAVHDVKQMIDPVFRDEGDLVAIIGSDLLAYDKGKLYAAQGQTPTEKERIEEAQVIATYGGLPSFLVPFFPVKGIMVTSWDNLSIYFQDTSWRRHLLENPKRSRVEDYNGRNEGYVIEQLGKFAALESDSVELAP
KB-PA_3-chr1	680064	679111	-	CDS	Phage capsid scaffolding protein	atgccccgttcccttgtttcaccgtggaagcgcgtggccgtcagcggcgacaccgtagacgggcgcgtcatcaccgagcaggaactgcgcgactgcgcggaaacctacgaccgcagtttctacacggcgacgatctgggccgaacatgatcgctggaggggcgcccacggcacggtctacgaagtgcgcctggtcgaagcaaaggacgacccggaacttgagcccggccaggtcagcttggaagcccgcctgcgcccgaacgacgacctgctggccctgaacgaccagggcaaaggtctgttctccagcatcgagatctggccgaacttccgcaattccggccgctgctacctctccgggatggccgtcaccgacgagccggcaagcacccgcacccag…	MPRSLVSPWKRVAVSGDTVDGRVITEQELRDCAETYDRSFYTATIWAEHDRWRGAHGTVYEVRLVEAKDDPELEPGQVSLEARLRPNDDLLALNDQGKGLFSSIEIWPNFRNSGRCYLSGMAVTDEPASTRTQELYFSRRRPNGAGVRFFTNSHPLSNLREDDGATAPEVRGLIASLTRVFKLFSVPNTPTENPSSDEVEPMDEATAKALKALYDQLVIILAGLQAVIEPVVEDVDTSDTQEQVDAVGAAVQDVVDQADEERDFKRKKGKEGKETKELSARMDELQDTMAKLLNTAQGRKIPRTTGAAAKARGKGLR
KB-PA_3-chr1	680222	682270	+	CDS	Phage terminase, ATPase subunit GpP	atgtcgtactcaatcgaagtgaaggaagccgccaagcggctgtatctccggcgggcgaagccgaaggagatacaggcccagctgggcctgcccaacgtccgcatcgtctattactggatcgcccggggcggctgggacgaactgctgacagatgaagaacccctggccgcgatcagccggcggatcacgctgattgcggagaagcctggggcgttgtcgaaagcagacctggacgaactggaccgactgacctcgatccgcgagcgcctgcagaagcaggcggccaggcctgcgccgtcacctgcaggcgagcccgcaccggaagcccgcgccgagcgcggccgggagcgcggcgagcgtccgccacgagagggcaaacgcaagcccaaaaagttgaag…	MSYSIEVKEAAKRLYLRRAKPKEIQAQLGLPNVRIVYYWIARGGWDELLTDEEPLAAISRRITLIAEKPGALSKADLDELDRLTSIRERLQKQAARPAPSPAGEPAPEARAERGRERGERPPREGKRKPKKLKNDVSGVTEIDFLDKFTSRMFGYQLELFAAKKNPLTARIRHILKSRQIGLTYYFAAEAFMDAVLTGDNQIFLSASRAQSEVFRSYIVAFAAQWFDIELSGNPIILSKDGKPWAELRFLSTNSNTAQSYHGHVYIDEVFWIPNFQKLQTVASAMASHAKWRLTYFSTPSAVTHQAYPYWTGEEFRNSKRGKKAGPWPSEAQIHAGALCPDGQWRKVITIQDAIAGGCNLFDLERLQLEYDEERFEQLFMCKFIDSTQAAFALADLERC…
KB-PA_3-chr1	682329	683036	+	CDS	Phage portal vertex protein GpQ	atggtgttcggggaatgcttcctgtacctgcgcgagaacatcgccggccaggtcctggagctggagcacctgccggcgatcaacatgcgttgccgattggacggcgggtacaccatgttactgccgcatgctgaggaactggagtttgaccaggacgaagtgctgcacctgaaagaatacgacgtggagcagaacatctacgggatacccgactacttgggcgggctccagtcgctgctgttgaacgaagcggcgacactgtttcgccggcgctactacagtaacggcgcccatgccggatatgtgttctatacgaacgacgagaacttgtcggaagaagatgaagagaatctgaaacagcagattgcggcaagtaagggagtcggaaactttcgctct…	MVFGECFLYLRENIAGQVLELEHLPAINMRCRLDGGYTMLLPHAEELEFDQDEVLHLKEYDVEQNIYGIPDYLGGLQSLLLNEAATLFRRRYYSNGAHAGYVFYTNDENLSEEDEENLKQQIAASKGVGNFRSMFVNIPGGSEKAIQIIPVGDFQAKDELEKVKNITRNDVIAAWRMNPALAGIIPENSAGFGDIEKIDRVYMNNEIRPIQQLFLQVNEVLREDRRIAFKEPVSG
KB-PA_3-chr1	683082	683342	+	CDS	hypothetical protein	atgcgagtttattgcaaggtgtgcggagagaaggcgcggattgctacgcgagaggacatcaccccggagttcgccaaactctattgccagtgcctggacgcgaagggctgcgggcataggttcgtcatgaacctgtctttttcgcataccttggttccggcggcggagcctctggaccggctgctgtttgaccggctccgggagttaccccgccacctgcaggttgagctatttaatcagctcggggccttgcggtcctga	MRVYCKVCGEKARIATREDITPEFAKLYCQCLDAKGCGHRFVMNLSFSHTLVPAAEPLDRLLFDRLRELPRHLQVELFNQLGALRS
KB-PA_3-chr1	684167	683886	-	CDS	hypothetical protein	atgagcaacggcgcccccgttcacgtccaggagcgacaggtattcaacgtcagcccggagcgtaaccgccaggcccaggcccagttaggcctaccgcccagcttcgtgatcttcgaggcctccggcgtcctgaactactttaccggcctgggcgtggtccaagtgcccctgccgcaaggcgagttcctggtgggcctgcaggatcctgtcggcgctcgacgcttcggcgttgtgcgctttgacggactcgacgaccaagagggatggggggaacagcagtag	MSNGAPVHVQERQVFNVSPERNRQAQAQLGLPPSFVIFEASGVLNYFTGLGVVQVPLPQGEFLVGLQDPVGARRFGVVRFDGLDDQEGWGEQQ
KB-PA_3-chr1	684394	684164	-	CDS	hypothetical protein	atgaaagctgaccgccacggcactctggaagaacagaaacgctacgcgctgcgctggcaggacgtgaacgaacgcccggagtgcggcaactgctgttacctgcgcaccgagaaagccccggcagcagcttgtccaggtgcggccacactggccgtccaccactgcgaccggggcggtttcgtcaccaccaggacggcgatctgcgaccagcacaggaggaagaaagcatga	MKADRHGTLEEQKRYALRWQDVNERPECGNCCYLRTEKAPAAACPGAATLAVHHCDRGGFVTTRTAICDQHRRKKA
KB-PA_3-chr1	684606	684391	-	CDS	hypothetical protein	atgcgcgttcgtaacgacgagatccgccagctgtgcaagctggccagggcaatgggttacgccgtccagcagaccaagcggctgcacctgaaattcaccaagcccgggcggcctccagttttctgcagcagcaccccgggggactgccgcgcctggctcaatgcccgcgctcagttgcgccgttccgagctgatggcagagggtggccccgcatga	MRVRNDEIRQLCKLARAMGYAVQQTKRLHLKFTKPGRPPVFCSSTPGDCRAWLNARAQLRRSELMAEGGPA
KB-PA_3-chr1	685006	684593	-	CDS	hypothetical protein	atgacagtagcaacccaaggcggcggcgccgctgagactaccaccccacggcccaatacgctcaccatcagcgttcgcttctcgaccggcacctatgttgcccgggcgaagggccataagcagacagccagttgcaccgaaaacgcctgccgggccgccgagcgactgaccgagaaactgggcatggaccccaagaccttggaactgcgggagcatctggaccagcgctggatcttccagacaatcgagctggtgcccggcgagttcacccacttttgccacctctgccccgactgcggacagacacacctggtgctaatcacgaaggatgcgccgcatccctactgttgcggccggcgcactctgttcaaaggcggacggcacgtccgggaggtcgca…	MTVATQGGGAAETTTPRPNTLTISVRFSTGTYVARAKGHKQTASCTENACRAAERLTEKLGMDPKTLELREHLDQRWIFQTIELVPGEFTHFCHLCPDCGQTHLVLITKDAPHPYCCGRRTLFKGGRHVREVADARS
KB-PA_3-chr1	685430	685074	-	CDS	hypothetical protein	atgcagaacgaacagacgccacgccagaccctggaagccgtactggtgacagctctaatcgagagagccaccaccgccgcgctgaaacagttggtaccagcggccttgtgtcacaccgaaaagggcagcgtgatcggacgcttcctgctcgctttggacgacggagccggacaccccttcaacctgaacgatctgcgccgcctggagcatgtgcaactggatgcctgcctgcagatcctcgccgtcgatcatgcaggccggcttaacgtccgccagcgcgtggaaaaggacgcggacggccgcctggtctgggctctgctgagcagcatgtgggcgccccgcaaaccgaacgcctga	MQNEQTPRQTLEAVLVTALIERATTAALKQLVPAALCHTEKGSVIGRFLLALDDGAGHPFNLNDLRRLEHVQLDACLQILAVDHAGRLNVRQRVEKDADGRLVWALLSSMWAPRKPNA
KB-PA_3-chr1	685847	685446	-	CDS	hypothetical protein	atgaacgcaagccaaccgctcacccatgaattggcccgcgtttgcggcccgttcgacctggcaagcaccaccgcgcaccaggactttctgcactgctggcggcgtggcgccaagttgctgggcctgccgctgctgcaactaccaccggcgaggcattgggaaatacccgtgatcgaggacgcgcacctaccgcaactgctcaaggcctttcggaccttggacacgtcccgccaggtactgctgctgaccatgctcagcctggccggcttcaagcggtcggcatggctcagtcaggaagtgggtctggagttcggccaattggccgcctgcagactcggaaatgaagtgttccaggtggtggtcggcctgctggcccaccaccgcgaaaccccaagcaac…	MNASQPLTHELARVCGPFDLASTTAHQDFLHCWRRGAKLLGLPLLQLPPARHWEIPVIEDAHLPQLLKAFRTLDTSRQVLLLTMLSLAGFKRSAWLSQEVGLEFGQLAACRLGNEVFQVVVGLLAHHRETPSN
KB-PA_3-chr1	689143	686450	-	CDS	Phage protein	atgaccgcacgcagcacccaagagcagttcgaagatatctaccgccaggacgtgatcccggccctggagaacgacagagaactggacttcaaaccgcacgaagcctcggacgagtacctgaacaaagggcaatgtccgggctgcggcaagcgctcgctgtacatcagcaagagcaagccctaccagttgaaatgcaaccggttgaaccagtgtggttacgaagagaaaacccgcgaacgctaccgccacctcttcgagaatctgagcgagcgcttcccttcgacgccggagaaccccaacgccaccgccgacgcctacctgcagcgcagccgcggcttcgacatttccaagatcgcgggctggtacacccagggccgccggccgatggcgaacggatcc…	MTARSTQEQFEDIYRQDVIPALENDRELDFKPHEASDEYLNKGQCPGCGKRSLYISKSKPYQLKCNRLNQCGYEEKTRERYRHLFENLSERFPSTPENPNATADAYLQRSRGFDISKIAGWYTQGRRPMANGSWADTVRFPLCNGYWERIIDARAVAANEGDKAGIRKGMTYKGDGWEPTGQTYEKNDRVYIVEGIFHAIALWLAGYKVIASISANNFPWRILEENKGKLITWIIALDDDPAAHAVIPKYLAGIRKRGEIGWVALAGQRADGKKRDWDDVYRDGQLDDAFLQEACYRGRLFCATSPMKKAYLLYIKRPRPFFLVEFDNCLYSARVNLTELQKDLDGDDVDGHQPEFAKHTTISQVANCVPRFEYIERDAITGEQRYFFQFDFPNSRLNC…
KB-PA_3-chr1	688488	688592	+	repeat	repeat region	gggaagttgttggccgagatcgaggcgatcaccttatagccggcgagccacagcgcgatggcgtggaagatcccttccacgatgtacacccggtcgttcttctcg
KB-PA_3-chr1	689396	689154	-	CDS	hypothetical protein	atgcagatcaccatcgacacgccgtatgtgacgccaaacgagtttgcgaggcgtgctggcctcaacgaacgcaccgtgcgaaacaagatcgagcgcggcgaattcctgatccgcccaaagtggccaggcgaagccaaaggaacggttttcatcaacatgatcgacttggccatggaggccgccgagcaggcgcaacgggtacgcgccgagaaaaaagcgaacggcaaggccggtaagcagtaa	MQITIDTPYVTPNEFARRAGLNERTVRNKIERGEFLIRPKWPGEAKGTVFINMIDLAMEAAEQAQRVRAEKKANGKAGKQ
KB-PA_3-chr1	689490	689726	+	CDS	Phage immunity repressor (ACLAME 831)	atggatttgccagcgaagttcaaggcgatacgtgccaaggaaaagctcactcaggcggagttctgtgccttggtggagatcagcatcagcagttggaagaaatacgaggcatccataatcgacatgggggccactcccctcctgaaagtcaccaatcacccccgtttcctgaagtacacgctgtggctgatgacagggaccacggctccagcgtgcggccaggtgagcccggagtga	MDLPAKFKAIRAKEKLTQAEFCALVEISISSWKKYEASIIDMGATPLLKVTNHPRFLKYTLWLMTGTTAPACGQVSPE
KB-PA_3-chr1	690934	690858	-	rna	tRNA-Met-CAT	gggcctatagctcagtcggttagagcagaggactcataatcctttggtccacggttcgagtccgtgtgggcccacca
KB-PA_3-chr1	692717	691032	-	CDS	Retron-type RNA-directed DNA polymerase (EC 2.7.7.49)	atgaaagaactcagcccatcggccgggtctgcgctttccggcgctccgcagcagtggcacgacatcgactggtgtcgggtccagcggaatgtccggggaatgcaggtacggattgcgaaggcttgtcgggaaggcaaatggcgcagggtgaaggccctacaacggatgctgacccgctcgacgtcggccaggtacctggctgtacggagagtcactgaaaaccagggcaagcgcacggcgggagtcgaccgcgtgctctgggatacgcctgacaccaagtggaaagcggcacaagggttgaaaaggcgcgggtaccaacctcggcctctacggcgagtgttcatcccgaagtcgaacggaaaggagcgccccctgggtatcccgaccatgactgacagg…	MKELSPSAGSALSGAPQQWHDIDWCRVQRNVRGMQVRIAKACREGKWRRVKALQRMLTRSTSARYLAVRRVTENQGKRTAGVDRVLWDTPDTKWKAAQGLKRRGYQPRPLRRVFIPKSNGKERPLGIPTMTDRAMQALYLLALSPIAETTGDPNSYGFRIERSTADAMSQLFVCLSGKASAQWILEADIQGCFDHINHDWLLNHVPTDKVILRKWLKAGVIHKGQLQATDAGTPQGGIISPTLANMVLDGLESQLKRHLGVTRAKKLKLNVVRYADDFVITGVSPEVLEKEVKPWVEQFLAVRGLQLSLEKTRIAHIDQGFDFLGWNFRKYNGKLLIKPSQKNAKAFYGKVKEVIETSRTARQEDLIRTLNPILRGWALYHQPVVAKQTFSRMDNRVFL…
Additonal Region 3
KB-PA_3-chr1	1055306	1055434	+	CDS	Hydrolases of the alpha/beta superfamily	atgatccctaatcatcacaaggtcactgcggcctacaacttcggaattggcgccggctgggctggttggatgccctggagagaggcgctgaaggttcgcctgatgtgggccttcttgtggcctctgtag	MIPNHHKVTAAYNFGIGAGWAGWMPWREALKVRLMWAFLWPL
KB-PA_3-chr1	1057231	1056479	-	CDS	hypothetical protein	atggctagagaaatagaatcattctcagtatgggcacccaaaaatcttcatacggaatccgatattgcctgggcacaaaactacctgcatagaaaaggggggatatctctccatgggcctgtagatttagatcgacttcttaaagcaggagtacaactagagagaaccgactcaggaagaaatgcccttagacagttaaaggctgcctataggacaagaaaaagcaggagtgcggaggaaaaatcaagcgctggagacataaaacctgcagagcaaaaccttccctctcaaaacaagaatcacaaaaccctaataaaattagccgataagatactaaaatccgaagaatcacttagacaaaaatcaaaaaccctagaaagccagaaaaaagaattaaaa…	MAREIESFSVWAPKNLHTESDIAWAQNYLHRKGGISLHGPVDLDRLLKAGVQLERTDSGRNALRQLKAAYRTRKSRSAEEKSSAGDIKPAEQNLPSQNKNHKTLIKLADKILKSEESLRQKSKTLESQKKELKERVSKSQKITQKALNKIEKIERTLNTLRGKEPHKSEIEKVILNNEEIKELLVDILNTLDPRPIKSRPLRKSDITRHANRQKLKTKIPETPETKNKNSKSIPITVLELIDKINKQIAE
KB-PA_3-chr1	1056937	1074499	+	repeat	repeat region	tgttttgagagggaaggttttgctctgcaggttttatgtctccagcgcttgatttttcctccgcactcctgctttttcttgtcctataggcagcctttaactgtctaagggcatttcttcctgagtcggttctctctagttgtactcctgctttaagaagtcgatctaaatctacaggcccatggagagatatccccccttttctatgcaggtagttttgtgcccaggcaatatcggattccgtatgaagatttttgggtgcccatactgagaatgattctatttctctagccatgccgtctgtccattttgttgcgttacggtaacgttacgctatggatttttgaggttcaagtgcggtatagggggtaaaatctaaaaaaaggggggtattgcatg…
KB-PA_3-chr1	1057333	1058577	+	CDS	hypothetical protein	atgggcgagaggctgctgactgcgccgatagctggcgttggggctgaggcgaagtacttcctcattgcgttcatctatcgctttggcgctacacgctgggtggagatgccagtgagtgagttggcttcgtccttgaaggtgaccgctggggcggtatccagggcccgcaaagcgttgattgaacaccaatgccttgaatgccacaaggctcctactggagggaggcccactctcgggctaaaggtgggccgggggctggccagcaaacttggtgacctcagcacttcggcatcccatcatgggcccgttctgcgccaccttttcagcggtgcgatctatcgtgactatgaggccaatcggacgccgatatcatcgaatgagcttctgaggccgcaactc…	MGERLLTAPIAGVGAEAKYFLIAFIYRFGATRWVEMPVSELASSLKVTAGAVSRARKALIEHQCLECHKAPTGGRPTLGLKVGRGLASKLGDLSTSASHHGPVLRHLFSGAIYRDYEANRTPISSNELLRPQLRLLLATLFAHANELGLVDNLGLAQLRQLLGEDDEEKVDRWLKELLQLGFIRRKIAGLSDSLYADTKVTSSYILNLNHPGLASAGCSSPVVAFYGEAMRSEESRHGFAERFARVQGEFQGLGRTYEMLVWKIYQGVSLLLSNHWSVLGESVRLPQIDGLEKIMTESLHASGKDDSSLEVMVAEMCWWAFHLASRVKNRIAGDSAFASLVGRRVLAFPAKNRDTDDSMTLVFAQEPKGEGPECIVSLSGTKGHVEIWTKEFGLSREQL…
KB-PA_3-chr1	1058626	1058838	+	CDS	Transcriptional regulator, AlpA like	atgtccatgaggatcatcagtttgaaagaggtcatggacctcaccagtcttgctcgctcgactatctataagtacatcgctctcggcacgttcccgcttccgttatctgtgggggagcgttgcgttcgctggctggagagcgaagtgcacgagtggatccttgagcggatcgctgagcgtgatgagaaactccaggctgtaggtaagcattaa	MSMRIISLKEVMDLTSLARSTIYKYIALGTFPLPLSVGERCVRWLESEVHEWILERIAERDEKLQAVGKH
KB-PA_3-chr1	1059230	1060180	+	CDS	hypothetical protein	atgaccaatcaaacagccaaacatctctcccaatccgacatcgctatccagatcgaacgactcgtgaacgcagtgatccgtcacgactgtcctgcattcaggatcagctacgacgcacagggggatgaagtcatcgagaggaccagactctctcggtacttcgatcacattcgacagatgtaccacctggtgcatgacgagacgtacgccttgagtgagcacctgctcgcattcaaggaggcttgctacgacatcggcatcgagtttgggatgttcgggatgacgtgcatggacgagagcgagggagggctcctgtcagaggcccagacctacaactggctcgtggagaggatccgggagcacgtacagaccaagtggttcaagcgtgggaagagtgat…	MTNQTAKHLSQSDIAIQIERLVNAVIRHDCPAFRISYDAQGDEVIERTRLSRYFDHIRQMYHLVHDETYALSEHLLAFKEACYDIGIEFGMFGMTCMDESEGGLLSEAQTYNWLVERIREHVQTKWFKRGKSDRAYREKGNRQTVTEYVERVLDSRSRTVVVRVNLYYRESVRSRLKVEDVFEDLDRLIRAREHDPIFQHETGYICAVEQGEDMGYHIHAAFFFDGREVFKDIFKAEAIGALWERITEGWGYFHSCNHEKEKYEDDRGVGMFSRKDAVGRRNVIKACLYLIEDGQSLRVKPVGARAFRVGRILRGY
KB-PA_3-chr1	1062361	1060331	-	CDS	hypothetical protein	atgggcaacaagatcgtcaatcgacttgtccagaacgggctgcttccagaagccaggatagaacccaaggatcatctgcggacgaagattgccaaggacgctttcacccgggtgtttaaagcgatcaacggcagcaacgtcacgccggacaaggagttgatcgatggattcatcgccttcttgctgctggtcaagtcgagcacgcacagccccgaggaggtgttcgaaacacgccagtacgggccgataacccaagggtacgtcgaggcatttcgtctctatgaagagcaccgggcgcagctgaaggtcaggttttttgaagatcagctgtacgaccccgtcaagctgatgctgaggcaacccgcgacacagcgatacgttcagaaccgggttgaccac…	MGNKIVNRLVQNGLLPEARIEPKDHLRTKIAKDAFTRVFKAINGSNVTPDKELIDGFIAFLLLVKSSTHSPEEVFETRQYGPITQGYVEAFRLYEEHRAQLKVRFFEDQLYDPVKLMLRQPATQRYVQNRVDHLIVDEAQDMNGIQIALLKILAGDRAKVMLVGDEDQAIYDWRGAEPDYLIRGFEQDFPEATRYTLPHTFRFGHMLSIAASQVISCNTNRNPKISISAKGTPRTRIHCLPLALGLADLGEHVAERLTSGVKLQDIAVLVRTYDLSVTLELDLHQRGIPYHVYGRPPLMRIPEISALLGVLQLASGRWKTLDADQLRYVIKSLLYRPTLYLDKAAINRVVEFVVRQPERLVEAIRSTITLQTKDYQANQIRDRADLLEILATATDPQEK…
KB-PA_3-chr1	1063898	1062801	-	CDS	hypothetical protein	atgggattgtctgtgcgtaagtcagtgagagtgggcccgttcaggttcaacctctcgaagtctggaattggtgtttccgccggcatcaaaggcctccgggttggaaccggacccaggggcaactacatccacatgggacgcggaggcttttactaccgccaaacccttccatccaatagctcggcccctgccattgcaccacccaagccggtgagagcgcccaccccagtagtcgacatcccatcgcacacgcacgagcccctcaaggaaatcgatagtggcgaaattggcttgatggtggactcctcatcgcaagccctcgtcgacgagctgaataccaagcgaaagcgcttgcgcctttggcccttcgtcgccgcactcaccatcggcgcgtttgtc…	MGLSVRKSVRVGPFRFNLSKSGIGVSAGIKGLRVGTGPRGNYIHMGRGGFYYRQTLPSNSSAPAIAPPKPVRAPTPVVDIPSHTHEPLKEIDSGEIGLMVDSSSQALVDELNTKRKRLRLWPFVAALTIGAFVLSAKQLPPWALLTLLIVGGLLMAVTYYWDLLRKTTVMLYDIESEFAGVVEQLHTAFDGVRSCRATWHLQAQGKVLDRKYHAGASHLVTRSSIALGLQNPPFVKTNVATPSIPVGRQTLYFFPDKVLVFEANGVGAVSYENLRIDISTTNFIEDGAVPKDAEIVSRTWKFVNKKGGPDRRFKNNRELPVVRYEEVQFSSNTGLLERIQISCVGRTSSLAQAIGSISRAKGERQ
KB-PA_3-chr1	1070673	1064002	-	CDS	DNA helicase related protein	atgagtgatgaggttgttgagcagccaggtaacgagctgccccaggatccgcacgccaccgttggggctatcgaaccggagacgataaagactgtccgtattcactctacactggtcgtcaagctcaacctggctgacttccagaactcggtaccggtgattcgagagctacgcctgatcaacgacagtgatcagaagtacagcagactagaacttcagctcctttccgatccgctcgtattcaagcccaagacctggcatatcgacgcgctgggccctggcacattcctccccataccagggctcgacctgcagatcgatggtgccctgctggctcgacttaccgaagctgagagtgcagccgtcacctttgttctgacgtccctgggcaatggtgac…	MSDEVVEQPGNELPQDPHATVGAIEPETIKTVRIHSTLVVKLNLADFQNSVPVIRELRLINDSDQKYSRLELQLLSDPLVFKPKTWHIDALGPGTFLPIPGLDLQIDGALLARLTEAESAAVTFVLTSLGNGDEERQELARLELPLELLPRNQWGGLSHLPDMTAAFVQPNDLAVERLLKKAAELLRDQGKNPALNGYSGGSAHAWEIASAIWAAVASLKLDYALPPASFEQFGQKVRSPSHILESGLATCFDLSLLFCAALEQAGLNPLLIFTRGHAFSGFWLKAEEFSNSTVDDITALRKRMRLNELKLFETTLITQPNIPSLPYAIERGAQHLAEGQEQEFELALDIRRARLQRIKPLASAEAAPALGTASSEQCLVDQELLIDEPPELPDEAPVE…
KB-PA_3-chr1	1071031	1073187	+	CDS	hypothetical protein	atgactgagagagggaaacgatgccggcagcattaccagtcggtttatgaaaggaatcagcctgaagtcgacgcggggcgtgctcttgatgaaagcctgcatcatttcctggatcaacggcctgcaggtaaaaacctctctgcacttgaccgcgcgactggcctggcttcagcaccgttctggcatgatgcggaggcggtcgctcgctccgagctggcaagccttgccctcagtcgggtgctgcacttcgacaatgcagtcagcgccgagctactgctggagctggccagtcatgccccggacacgctcagatgggcaatccgctactcgaagctgtttgagcgtactgcttcgccgctatggcttgcgcttcgtgcagcgctcgtggggggagagtgg…	MTERGKRCRQHYQSVYERNQPEVDAGRALDESLHHFLDQRPAGKNLSALDRATGLASAPFWHDAEAVARSELASLALSRVLHFDNAVSAELLLELASHAPDTLRWAIRYSKLFERTASPLWLALRAALVGGEWQVFFGVCDRLLDQLKPFDELIGNAEKQLEHLSLLELIAYLSVLAYQAFAEDAPDDRSGQQWQVYNRIILRKLRACPEQDFRLNESRLGQSLKRHLSPVIFPESSTADAARCRENLEWLAVLIAATQERIDYEGSIDWFCFDPECRYQLKPGELVIYNQSEAGTERWQRTGRKSDLLWHYWMSRAVQAFVNSGLAEQMIGSPENHELNQLAYIKAMRSELQLQQIYGLGHRRSLSNGTQVQLHHVLLASELTSVFFQSQFIQPFQDY…
KB-PA_3-chr1	1076518	1073315	-	CDS	hypothetical protein	atgagcgaaacggtcgaagcagcaccccaggaaatcttccaacagccgctggatgcctcggagcaggaggcggttgaggccctcgtcgcccagcaccggaacaacgccgcgcagacccagcaactggcggtggatgcctcgcggctgatcacctgcagcgaagagcgcctgaagcaacaagccgaaagcggattcttcaagcggtttgccagtgcgttcactggcaagagtcgtcagaaccagttgcagaaccaggtcgacgcgctgcacatgcagaaattcgcctggcactacctcaagcaactgcaacagcagaacctgatcaacgcccagagtattgcggtgatccgcaacaacctgggcacgatgaacgaatacatcatcgaaacccgcgaattc…	MSETVEAAPQEIFQQPLDASEQEAVEALVAQHRNNAAQTQQLAVDASRLITCSEERLKQQAESGFFKRFASAFTGKSRQNQLQNQVDALHMQKFAWHYLKQLQQQNLINAQSIAVIRNNLGTMNEYIIETREFLFQAVDKINRRLIRVENNTSFHQWSLNIEANKRRFKSMPKALLVLNLAYDFMRSHPGVALTAQDINHLIVTLEKLDVDCDEEVELLSFIIDLIDQIEATSIERYRAVIELSFEEHVADSYFIQKNISGLAFNSLYYLSDEYDRIIDMISDGEVCDSDEKRERIISRFFGKAFSGLYTQYRMRDLIEEIIGGSLLTLEIYKDQHGLNALPGEAIEDAHAETVALVSSLPDINAHSFFDTTDDREARHNYLLLFALCIENSGALSRQG…
KB-PA_3-chr1	1077946	1076531	-	CDS	hypothetical protein	atggacaacgaacgtaaaagggcactgaacaactcagtcagcctctgtccgatctggcctacgcaggcatcggaaaagattggccacatgctgaccgagatcagccacgcaaacgtcatcatcgacaagattgccggaacggcacagaacagcgcgatcaaaggcgggttcgcggccgagacctggcacgccgaatcgttcaacctggacgccatcctcaaggacaaggacgtccgggccttcaccgataactttaccaataccccgctcgccaagaaccatacaacccatgacatcgtcgtgatgaaaggcgatgagcagttgctcggcgcgcaactgaaatatttcaagaatggcgatgccacccaaaaggccttcaggtccactaaggatggcatt…	MDNERKRALNNSVSLCPIWPTQASEKIGHMLTEISHANVIIDKIAGTAQNSAIKGGFAAETWHAESFNLDAILKDKDVRAFTDNFTNTPLAKNHTTHDIVVMKGDEQLLGAQLKYFKNGDATQKAFRSTKDGIHQYRDSDAFIGPADQIEQIKDAAKRDMLRNQQTRPEVANAAEKVREKTTANLDVEGAQSTPLSKRDAEHLGSGSKTGKELHENMQNGYLNKATVQQSLRAAGSAAVITTVIAGSINTFQSIKRVRDGEITAEQATLLILQNTAIAAGDSALKAGVATATVSITARNLPTLFAGSAFKRTFANSGVAAAAVCAVDVVQNVVLFAAGKITREELETRAGHNLLQSGAAVVGSSVGAAVGALGGPIGALVGGIIGGLITTMAMSIAIDN…
KB-PA_3-chr1	1079017	1077989	-	CDS	transcriptional regulator-like protein	atgtcccaagcgaaagatacgctgctcaggttattcgcattattgcgactgatacccaccgagcctcggcgcatcgcaacaccaacccttctcgaaaagctccgcgataaaggcttttccgtaactctgcgctccatccagcgcgacctgaaccggctgtctgttcccttctccttacagtgtgacgatagcgaaaccccattccgctggagtttcacacgagacgcaccactgaagttggaagacatggatgctcccaccgcgcttgccttgtacctgtcggaaagccatctgaacaccttgttgccccagacggtgctggatcaactgagtccgcagttccggcgggcccgaaacttccttggcagcctgggcaataatggcctggcggattgggct…	MSQAKDTLLRLFALLRLIPTEPRRIATPTLLEKLRDKGFSVTLRSIQRDLNRLSVPFSLQCDDSETPFRWSFTRDAPLKLEDMDAPTALALYLSESHLNTLLPQTVLDQLSPQFRRARNFLGSLGNNGLADWARRVRAIPYGKTLLPAVIAPTVWDQVSTALLERKQLDVAYQSRSKGELKRLRLHPAGLVSRHAVSYLLASVDGYSDLRQFALHRIREVRVLDEAAESHATFDVDDYIDTGIFSHRQAETQVELIADVHPQIAALLSETPLSTVQSLSDLPNQAWKRLHAQVALDRDTLWWIFGLNDNIRVHAPQVWVDEIQQKLGNLRTFYSGPDYSPHA
KB-PA_3-chr1	1079312	1079193	-	CDS	hypothetical protein	atgaaaaatctgtttgccgcaatcggcctcattgtagtgctgaagaaagggtacgagctgtactgcgaatacaacgaactgaaacgtgagaaagaggctcgtcagtctccttccatgtga	MKNLFAAIGLIVVLKKGYELYCEYNELKREKEARQSPSM
KB-PA_3-chr1	1079601	1079389	-	CDS	hypothetical protein	atgccaatcccacccgctcccttcaccctcacctgcgcgtgctgctcttggaaaaagaccatttttccccagagcgatgtgctggtactggaacgcgattggttcatcacctgccccaactgccatagcccttcgcttgaacgtcgcggcgctaatcataaggaaattctcaggacgcgcttggagcaattcctcagtgtcaataagcagtga	MPIPPAPFTLTCACCSWKKTIFPQSDVLVLERDWFITCPNCHSPSLERRGANHKEILRTRLEQFLSVNKQ
KB-PA_3-chr1	1080550	1079657	-	CDS	hypothetical protein	atgaacctctacctttccggcccacgcaggtgggccggttttcttcgagccctcacggtactgcttggcacccttctcgccgggtgccagtcgcctcgcgaggcgttgcagcagttggcgaatgcgcatgggcggcaactggagatactgccggggcagccgttcccactcgccatgctggcaccgaagggcaccacggcccccactcgtctgcgcgtctatctggaaggcgatggccatgcctgggccaccgccacgcaacccagcctggatccgagtccgcacaacctgttggtggcacgtctggcagtggacgatccgacgccgaatgcctatctggcgcggccctgtcagttcgtcatggcaccgacctgcgaacctgccctctggactgatcgg…	MNLYLSGPRRWAGFLRALTVLLGTLLAGCQSPREALQQLANAHGRQLEILPGQPFPLAMLAPKGTTAPTRLRVYLEGDGHAWATATQPSLDPSPHNLLVARLAVDDPTPNAYLARPCQFVMAPTCEPALWTDRRFSQEVVTSLSQALDQMKQRYGNREYELVGYSGGAALALLLAAQRDDVAQVQTLAGNLSPRLWAELKGLSPLNGSLDPLDYRSQLVSLPQRHLVGQRDTVIPSRLPDLYRRALGSPSHIECIHIPGASHDTDWEVAWKRWVQPLTPALQPSPCVQPRLRSSEAT
KB-PA_3-chr1	1083111	1080550	-	CDS	hypothetical protein	atgactccaaaatatcgcaagacactgctcgctctggcgatttccgccagcgccctgcccctcgccgcacacgctttgacgctgaccaacagcggcctggacagcgaaggcaacacctacaccgacagcaccgaagtgaccggcgccttcacgggcagcgaccagccccttcgcttctacagcgacaccttcaaccacgacctggtgctcaacgcccaggtgcaggccacgggcgatgacctcaatggtgtcgacctgtcttacgcgggtgacgacgacaatccctcgtccatcgacgcgccgactgaggtgttcggcaacctgcagaacaaaggcagcatcacggtgaatggcgctggcgtcaccggactgctcatcgatccggccatcatccatggc…	MTPKYRKTLLALAISASALPLAAHALTLTNSGLDSEGNTYTDSTEVTGAFTGSDQPLRFYSDTFNHDLVLNAQVQATGDDLNGVDLSYAGDDDNPSSIDAPTEVFGNLQNKGSITVNGAGVTGLLIDPAIIHGNLVNEGTLQVAGGVLEGDGIRGLKLAGQSVLQGDLINAASGKILADGDEATGIQLKGGTIDGKLINNGLIQVGGTESTGVLATYDDDMGSPDRVDLGGIENHGSIVASGDDATALRLDGVSFASAPVQVLNTGTIQADDAAIEVGAFDIDGANASNTLVIQNSGTLISQDEAIDASQASGGVHLVWNAGSITGNLIDLSNIEVNGDVTFSGTDASIDGANIRLKDGGWLDVGSDAGNTPAHLEFAQPHTTIQGNLDVAGNSSLGLN…
KB-PA_3-chr1	1083110	1083241	+	CDS	hypothetical protein	atgagtgctttatccctaaacagtatttggcgatttgttttttattttttgttttgcggagacctcttttcgaaaataaaaagttgggtggtgactgcgcagccaaacttggctgcgcagttggtggagtga	MSALSLNSIWRFVFYFLFCGDLFSKIKSWVVTAQPNLAAQLVE
KB-PA_3-chr1	1083754	1083308	-	CDS	hypothetical protein	atgcacaagcaactgcttctggcttctctcctcagttggctggccaccaacacagcttttgccggcacctccgaatggacctccagctacacccagggcgtcgaagaacacctggtcgacgacggccacgacaaccagttgagcatcgcctgcccggacgatgacgaaagccccgtctccgcctacgccaccctcgccggcaagcgctactcctccgaaaaggatggcttcgacgtcatcgtcgacggcaccaccttcagcaatcccttctacaccgactgcgaagcctgcagctccagcttcccaggcttctgggccgcgctgcgcaaggcccgcaccctgcagctcagcgccggtggccagacggtgacgctcccgactcagaaccttccccaggtt…	MHKQLLLASLLSWLATNTAFAGTSEWTSSYTQGVEEHLVDDGHDNQLSIACPDDDESPVSAYATLAGKRYSSEKDGFDVIVDGTTFSNPFYTDCEACSSSFPGFWAALRKARTLQLSAGGQTVTLPTQNLPQVLQPLTSKKNLCRSAW
KB-PA_3-chr1	1083893	1084240	+	CDS	hypothetical protein	atggttggtacggatcagaaagcactggctgaagcggtagggcgggcgattgccaagcagcgcatgcgctgcgggatgacgcaggacgaggtggcggaaatcctgggcgttgggaatgaagcggtatcccgcatcgagcgcggaatcgtcatgcccaacattgctcggctgttcgagtttgcgacgatcttcaactgcaacgcgatggaactgctgagcgaggccagcttgcgcccagatgaccaggcctcgcggatcagcggattgctgaatgtcctgggggagggcgaccgtcagttggtcgtggagatggtggagcggttgagcgagcgactcagtcgcgggtga	MVGTDQKALAEAVGRAIAKQRMRCGMTQDEVAEILGVGNEAVSRIERGIVMPNIARLFEFATIFNCNAMELLSEASLRPDDQASRISGLLNVLGEGDRQLVVEMVERLSERLSRG
KB-PA_3-chr1	1084605	1084270	-	CDS	hypothetical protein	atgatcacacggtgcctgatctgtaattcttccgtggtgttgtccaaggacgccgccaaggcgctggccaggctgatgggcacactggacggtttcttgcgcggcatccagcagtcacctgcccggcagcagccgataacctcggacctgcattgcgagagcccgctggagcgcgcgttcaacctgatgctcgatggcatctgcggcgcggcggcaaactggaacagcaccggcgatttcattcgcgacgtgcgccgcttccagttcatggagtacgactgcctctgcctccgttgcggggcgaagtacaacgaagagcccgtaccgcgccgctag	MITRCLICNSSVVLSKDAAKALARLMGTLDGFLRGIQQSPARQQPITSDLHCESPLERAFNLMLDGICGAAANWNSTGDFIRDVRRFQFMEYDCLCLRCGAKYNEEPVPRR
KB-PA_3-chr1	1084873	1084691	-	CDS	hypothetical protein	atgaacctggtgcgcttcattggtttgctgttcgtgttcatcggcgtgctggccagctgtgcagtggccgttgcgctgctggtgctcatgctgcgcttttggccgctggcgctagtcatcgtgctggcgctggtcctcttccaccgactcctccaacggatcgggctccgcatttccttctag	MNLVRFIGLLFVFIGVLASCAVAVALLVLMLRFWPLALVIVLALVLFHRLLQRIGLRISF
KB-PA_3-chr1	1085840	1084920	-	CDS	hypothetical protein	atgctcaaaggcttggccattaccccgccggtgctcgggcggatttccatcggcaaggtcgtcgagaagaacggcaagcgtctgccggaaaaggacgaccaattcaccctcacttcgcaagtccagctccgcgatggctggctaccccatcccctggacgaggagttgcgtaaggcccagggcggcaagatccgcagcattccgatccgcctgctgttcaacgcgccggagctgaacttccgtgccgagtactgtctgttcgatcggcagtccgggcggccactatgtgtcggcaacggcgaaacctgcaagcgtcgtagccaggacggcatcgcctcgctgccctgcccttcgccggatggctgtccgttggccaagggcggtgcctgcaaaccctac…	MLKGLAITPPVLGRISIGKVVEKNGKRLPEKDDQFTLTSQVQLRDGWLPHPLDEELRKAQGGKIRSIPIRLLFNAPELNFRAEYCLFDRQSGRPLCVGNGETCKRRSQDGIASLPCPSPDGCPLAKGGACKPYGRLNVAIGDEDPLGSFVFRTTGFNSIRTLAARLQYLQAISGNRLACLPLELRLRGKSTRQSHGSPIFYVDITVRSGLSMEEALLQARELDEARQASGFDQVALDATARLGFANGAFEDSDEETGAIVEEFFPEPTPESPPSAAPVVEPPATPKPTLSALLKARAEARAQHAAD
KB-PA_3-chr1	1086924	1085920	-	CDS	Phage exonuclease (EC 3.1.11.3)	atgactcatgttcattccacgcccaacagggcgcgacaacgccctgccctgcgcttggtcggcaccaaggatctgtctcgcgatgactggttggccgtacgcaagcacggtatcggcagctcggacgctgccgccgcggtcggccttaatccctacaagtcgcagctggagctctggctggaaaagaccggccgcgatgccgggctgcccaagagcgatcccaacgacgaggaaagcccgacctactggggcaacatcctcgagcccatcgtcgccaaccactacgcccggcgtaccggcaaccgagtgcggcggatcaatgccgtgctacagcatccggatccgaagcaggactggatgctggccaacatcgaccgtgaggtgaccggcgccagcgac…	MTHVHSTPNRARQRPALRLVGTKDLSRDDWLAVRKHGIGSSDAAAAVGLNPYKSQLELWLEKTGRDAGLPKSDPNDEESPTYWGNILEPIVANHYARRTGNRVRRINAVLQHPDPKQDWMLANIDREVTGASDVQILECKTAGINGARLWKEGVPVYVQLQVMHQLAVTGKQAADVAVLLGGQHLEIHRIERDDELIARLIELERDFWGYVQRDTPPPADGSESAEQALRCLYPEDHGHTLDFTQDPLLSAAFDELQAVRASLEVQSKREAELKQQLQQAMGDASRALFANGAVSWRKAKDSVVLDVPRLLKEKPYLLVRYPTTKVGSRRFLIT
KB-PA_3-chr1	1087457	1087056	-	CDS	FIG046709: Hypothetical protein	atgggctggctgttctcatcccgtacccggtcagagctgatccaagatctgatccgccccgaagacaccgcacgagccagtgttcgtgtacttgtgcatgccttgcgcggcaatgtgctgtggtcggtcaccgaagtgacggcgaaagctaccggtgtccatcctgacctcgcgcctggcgagtcgatgcgctttatccgctgcgacctgctgcaacgcagtggcggcgagtggggctacaaagccatggatgagtccatggcgccgtactactacagctgtccgctgcgctatctcggcatggccaaggaactctcacccggctggcgcgagaaggttcgtgcccatcatgcacggcgacgtcagtcggcgaccgccacagccggcgctgtagcccgg…	MGWLFSSRTRSELIQDLIRPEDTARASVRVLVHALRGNVLWSVTEVTAKATGVHPDLAPGESMRFIRCDLLQRSGGEWGYKAMDESMAPYYYSCPLRYLGMAKELSPGWREKVRAHHARRRQSATATAGAVAR
KB-PA_3-chr1	1088580	1087612	-	CDS	Mycobacteriophage Barnyard protein gp56	atggctcatctcatcgaacgtatggcctatgtcggcgaagccccctggcatggcctgggcagccgcctctccccgaaacaaccactggaagtctggcaacgcgaagccggcatggactggcagatccaggaaagcccggtccacttcaaagccgatgcggtcggccacctgggcagcatccactccttccccgaacagaaggtgctctaccgctccgacagcaaggcgccgctctcggtggtgtcccagcgctaccaggtggtgcagccacgggaggtgctggagttctaccgcgaccttacccaggtctccggctacgagctggaaaccgcgggcgtgctcaagggcggtcgcaagttctgggcactggcgcgcaccgggcagaacacctcgctgaag…	MAHLIERMAYVGEAPWHGLGSRLSPKQPLEVWQREAGMDWQIQESPVHFKADAVGHLGSIHSFPEQKVLYRSDSKAPLSVVSQRYQVVQPREVLEFYRDLTQVSGYELETAGVLKGGRKFWALARTGQNTSLKGNDLVNGYLLLATSCDGTLATTATPTTVRVVCNNTLTIAVDGATRAIKVPHSTRFDAQAVKKQLGIAVSQWDEFMYRMRHLAERKVQWHEAMGYFMQVLCDAQPNNPLPDALPNERALRRVQSLYEGRGRGSQLEAANGTAWGLLNAVTEYVDHERRARSNEYRMDSAWFGQGAVIKQRALEAALQLVA
KB-PA_3-chr1	1088936	1088679	-	CDS	FIG00957676: hypothetical protein	ttggtcggcacggtcggtggcgcagcgcgtggtgcatctgccgcccttgccggcggccaggccggtgcggcagtcggcgccattgctggtccattgggcatcaccctcggctcgctgtccggcgccatcctcggcggcctggccggtggtgtcggcggttgtgcactcggcgcccagcttggcgaccaactggatcgtcacgtcctcgccaacaacctctgcctgatctgcgggcatcgcttcaacctgccgacctga	MVGTVGGAARGASAALAGGQAGAAVGAIAGPLGITLGSLSGAILGGLAGGVGGCALGAQLGDQLDRHVLANNLCLICGHRFNLPT
KB-PA_3-chr1	1089620	1089177	-	CDS	hypothetical protein	atgagcacggaagacttcttctcaatacttgatgaaaagctaaaagcagcacaggaaaaggaagtgcttaaaaaagcaaccatggagaaaaaccttagtttcctcaaggaagtttcatcccgtctttcccctctagcaaaagactataaatcaaaactacaagagcgcggaatcaaggtagacttaaagatttcagattactgcatatcgtttagcctaatttatagagatggcggccatcacgccatagttctcggggctgctctaaactccaaccgcctcgaaataactgagaatttcaccgatgacgacggaagaaactatacatctctagatggttcatcttatgactcagcgaactggaaagatgaaatctacgaagaaaaattaaaaaaatct…	MSTEDFFSILDEKLKAAQEKEVLKKATMEKNLSFLKEVSSRLSPLAKDYKSKLQERGIKVDLKISDYCISFSLIYRDGGHHAIVLGAALNSNRLEITENFTDDDGRNYTSLDGSSYDSANWKDEIYEEKLKKSIESFISYADRHGGI
KB-PA_3-chr1	1092301	1089803	-	CDS	hypothetical protein	atgacagaaccaaaggcaggacagcgaccacactttcacttccagggaacgggccagccagaaaggttccgctcaacagcatccgcaaccagagacccacggttcccaagacaagaccgagtccaacacggcggagccttgcttggccaactacaccaagttggcgaacagatggccgcagccatcaatctccagcgccaatccggccaagatggcgggtttggcctgcagatcgagttcaagagcttccccggattcgaattagcctttgaggggcttgcgcgcggcgcccagcgcattgagttgctcaacttacgccgtgacccccaaactcaaaccgacatggcgacggttttcatccccgacgggcagttaaaagccttcgaaagtctggttcgc…	MTEPKAGQRPHFHFQGTGQPERFRSTASATRDPRFPRQDRVQHGGALLGQLHQVGEQMAAAINLQRQSGQDGGFGLQIEFKSFPGFELAFEGLARGAQRIELLNLRRDPQTQTDMATVFIPDGQLKAFESLVRQYLEANTSKGQPRNAPLLNPIQEIRFAAFSALWTDDPAVLPENDTDTIWWEFWLPVRQDREAVLNRFRSIAEASGFITSDKTLHFPERTVLNVFASKAAITQSILLLNEVAEIRRAKETAEFFDALPPIEQRQWVDELLARTTTGRDDSVRICLLDTGVNPGHPLLAPHIGLNDLHSVDPAWGVQDNVGHGTGLAGLALYGDLVDPLSSQSPITIQHRVESVKLLPAAAGNQKEPYGALTMSAVALPEIARPDVDRVFSMAITSTD…
KB-PA_3-chr1	1093302	1092319	-	CDS	AAA-family ATPase, Atu6082 type	atggctagtagcgaacatttgaaggcgcttctgcgctcacacatcaaaggagatgatgcccacttcctgtccgtcgcgatgcagttggcggctcatgaagcgaagcaagggcacggaaagcttgcagaagacctgcgagccatcatcgactcggccaagaaaagccgcctcccctcgagctcgccggttccgattggccagccacgaggcgaactgggcaacctgctgtctgctgttctaccccacactcgatttgcagagatgatcttggatgaggccacacacaatcgcttggcccggatcatcaatgagcagcgcaacttcgagaagatccgcgctcacggcttatcgccacgtcgaaagctcctgctggttggtccaccaggcaccggtaagacc…	MASSEHLKALLRSHIKGDDAHFLSVAMQLAAHEAKQGHGKLAEDLRAIIDSAKKSRLPSSSPVPIGQPRGELGNLLSAVLPHTRFAEMILDEATHNRLARIINEQRNFEKIRAHGLSPRRKLLLVGPPGTGKTMTASALAGELGIPLYVVRLDSLITKFMGETAAKLRQIFDAIRDTRGIYFFDEFDAIGSQRGLANDVGEIRRVLNSFLQMIEQDQSNSLIIAATNHPEILDYALFRRFDDVIEYGLPNSEQTKAVLKNRLANFSKSIRSWDKLCKIAEGLSYAELARAADDAIKDAIIQDRPQVDIKDVEKHLEERKAFHGRQRS
KB-PA_3-chr1	1095053	1093692	-	CDS	Integrase	atgcacgttgcgatccacaccatagccgggtacgctgccgggtacagcgaattcatacccggcaagaataccgggtatggggagaaggaagcgatcatgcctctcaccgatactcaatgccgaaccgcgaagcccaaggaaaagccatacaagctcacggacggaaacggcttgtacctggaggtaaagcccaacggcgtcaaagcttggcgatatcgcttcgagctaagcgatggccaaagcagaaaggaaagcgtcttcgccattggcgactacgtgatcgctccgaaagcggaaccccccgagcaagcccaagaacggcgaaatggccgacgattcacgctttcggaagcacgcgatgagcgcgtaaaagcgcgcgcgcttgtcgtacaagggata…	MHVAIHTIAGYAAGYSEFIPGKNTGYGEKEAIMPLTDTQCRTAKPKEKPYKLTDGNGLYLEVKPNGVKAWRYRFELSDGQSRKESVFAIGDYVIAPKAEPPEQAQERRNGRRFTLSEARDERVKARALVVQGINPAHHRQQERIKKAYERAITFEAVAKEWLTLKDWEEITKSKRLKMLERTVFPRIGKMPIKAITPVYILEVLKGIAQDNGPSVADEAKRTMSGVFELAIATLRANSDPVHPVRKALPANKTQHKRALSTEEIGQLLRDVESHGGRHETLCAFRLMWLTLCRPNEAVEAQWSEFDLDKAIWRIPAERMKKRKEHTIPLPKQAVEMLQALQCITGKYVHVFPHRDVRTRPMVSASFRQMLNVLGWGGKYSPHATRTTGSTRLNEMGFSA…
Additonal Region 4
KB-PA_3-chr1	1256427	1255126	-	CDS	Integrase	atgaccccacttcaattgaccgaggaatatctcttcgcacacgacctcagagaggccagccagaagacctatcgagcagcaaccagagcgctcatgaagcacttcggcagcacagtcaccgtgcaggaaatcactcatcggagtgtattggaatggagacgaaaggtattggagcaggggctatccaaacgcagttggaacacttactcgagccacctgcgcaccgtttggggatatgccattgagtacgaactgctgacccacagccaaatcaatcctttcaagaaaaccggagtgacgccgccaaagcggccgagcaagacagtagcactcgatgccatacaaagcgctcgctcctggctgaaagtgctagatagctccgagcactgcacgggggaa…	MTPLQLTEEYLFAHDLREASQKTYRAATRALMKHFGSTVTVQEITHRSVLEWRRKVLEQGLSKRSWNTYSSHLRTVWGYAIEYELLTHSQINPFKKTGVTPPKRPSKTVALDAIQSARSWLKVLDSSEHCTGERARITPVWFWRCVFETFYETGIRLNALLCIRKCDVDWKRKMILIRAETEKTHREFSVPITDGIAPHIRRLLQEAEQVGMSHHDQLFNVNRFSRHYARKEMNADQVEAMYRKLTEKTGVRMTPHRFRHTLASDLMKQHERNIHVAKDLLNHSNIQTTMSYIETDHDQIRAVLNERSLAQGAVAQTRKVDYSGSPQKAAHSRPALPRPTQRGSSPSTQVPTAEVTSTGSDQEIQAYNSPPFCTQRRADAVPPPADNSEQDLLFALLAQ…
KB-PA_3-chr1	1255517	1255631	+	repeat	repeat region	agcactgcccgaatctgatcgtgatccgtctcgatatagctcattgttgtttggatgttggagtggttgagtagatccttggcgacatggatattgcgctcatgctgcttcatca
KB-PA_3-chr1	1258346	1256424	-	CDS	Pyruvate/2-oxoglutarate dehydrogenase complex, dihydrolipoamide acyltransferase (E2) component, and related enzymes	atgtttcaactcctttcctggatctccaggaagccgtcccccagccaactaaccaaagctgccccagggggattcctccctcctctgagcagtatggagctgctcggcacacctcggcgccggcagctactggagaacatctggcagcgcgcctcgctatccaagcagcaattcgaggagatctaccggcggccactggccaactatgccgagctggtccagcagctccctgcttcggaaaaccatcaccatgcccatccaggcgggatgatcgatcacggcttggagatcgtggcctacgcactgaaggtacggcagacctatttgctcccgatcggcgcagcgccggagtcacagtcagcccaggctgaagcctggtcggccgccgcggcgtatggt…	MFQLLSWISRKPSPSQLTKAAPGGFLPPLSSMELLGTPRRRQLLENIWQRASLSKQQFEEIYRRPLANYAELVQQLPASENHHHAHPGGMIDHGLEIVAYALKVRQTYLLPIGAAPESQSAQAEAWSAAAAYGALAHDIGKIVVDLQVELQDGSTWHPWNGPINQPYRFKYVKSREYQLHGAASALLIHQLLPRTALDWLSRFPELWAQLIYLFAGQYEHAGILGEIIVKADQASVAQELGGNPDRALAAPKQSLQRQLADGLRFLVKDKFKLNQPSGPSDGWLTQDALWLVSKPAADQLRAYLLAQGIEGVPSSNAPFFNMLQDQAVIQTNAEDKAIWTATIDNGAGWRNKFTLLKIAPALIWADPAERPDSYSGSLVIEEGNASPEKPETTCEIPND…
KB-PA_3-chr1	1259756	1258506	-	CDS	Mobile element protein	atgtctcgcaaaccaagaacccagccggcagcgttgcctgtgattccttccgagttgctggagtcgtttggtgacggctcgatgacggccgaagctatcaatgcggcgtccctggctttcaagaaggccctgatcgagcgggccctggccggtgagctgaaccatcacctgggctacccggccggcacagccaagcccgagcggatgagtaatcagcgcaacggcaagggggccaagacggtgctgacccaggaggggccgatccgtatcgacgtgccccgagatcgcgagggcagctttgccccgctcctgatccccaagcatgagcgccgttttactggctttgatgacaagatcgtcgccatgtatgcccgcggcatgacggtgcgcgaaatccag…	MSRKPRTQPAALPVIPSELLESFGDGSMTAEAINAASLAFKKALIERALAGELNHHLGYPAGTAKPERMSNQRNGKGAKTVLTQEGPIRIDVPRDREGSFAPLLIPKHERRFTGFDDKIVAMYARGMTVREIQGFLLEQYGTDVSPDFISSVTDEVMAEVTAWQARPLEPMYPVVFFDALRVKIREDAVVRNKAVYLALGVLPDGTRDILGLWIEGTEGAKFWMKVFNDLKTRGVGDILIAVTDGLKGIPEALAAVFPATTLQTCIVHLIRNSLDYASWKDRKALAAAIRPIYTAVSAEAALAALDAFADGPWGQKFPTVCAAWRNAWDRVIPFFAFAPEIRKVIYTTNAIENVNSQLRKIIKTRGHFPTDEAASKLIWLALRNITAKWSRSAHDWKQA…
KB-PA_3-chr1	1260140	1260379	+	CDS	hypothetical protein	atgaatcatgacgacatactgaataaccgggcggagctactccaagagcaaaacggggatgacagcgggagcctgtgccatgacgagctcatctttgcgctgcaggataaacatcacgccttctcccttggcttgagcaccgttcttcagtgcttgaaaatggccgagcatgaaggggtggtccccgaacttcccgagggctggtggagccggatggctaatcgatacaggctgaattga	MNHDDILNNRAELLQEQNGDDSGSLCHDELIFALQDKHHAFSLGLSTVLQCLKMAEHEGVVPELPEGWWSRMANRYRLN
KB-PA_3-chr1	1260405	1261322	+	CDS	hypothetical protein	atggatgtctacaagttgaagccagaggaaaccgatgagcgaccaatcgagcgcgaacgtttcgaagaagaaacgcgacgccaggagccttggttctccacctctgaaaatggtacggagggacatttcgctgtctgtcccgcctgcgacaatccagtacaaatcataggtctttatcatttgcccgccaatgtgactcgtccttatgggcgtcattacgctcgttcggttcgagatcttgccgaagcggatgaggaggcgcgagagaactgcccttatttcaaaccaagggtacaccaaaagacagagcgaaaagcctcggtagacggcacgcctctgaaaatactaaaaatactgatcgagcagttcgacagggttgtctacctgctgcggaaagaa…	MDVYKLKPEETDERPIERERFEEETRRQEPWFSTSENGTEGHFAVCPACDNPVQIIGLYHLPANVTRPYGRHYARSVRDLAEADEEARENCPYFKPRVHQKTERKASVDGTPLKILKILIEQFDRVVYLLRKELGVNISQNLAIRMLEQYRREKGYLYTGATLTNIPWIFAYMADSQSLFGQLLLDDELIKAVSTEVSAASIDEYGRVSSKVDASGRKEYFDLNMCFVKHRFRKDSLEGELIEGMEMLVSTERKGKAIDIYKKSIVFNRQYFQRLIALPEDHPRRDRSLVEAARRVLGDLLPGER
KB-PA_3-chr1	1261691	1261332	-	CDS	putative plasmid stablization protein	atggccaagtaccgaatatcccatgatgctcaggcggacatcatcgacatcttgcgcttcacccaaaaccgattcggcgatgccgcgcgccgacgttaccaggcgctcataggggcggcgctggaagcagttgcgacagacccacaacaggtaggcagcatcagccgtgaagaattgggagctggcctgcgcagcatccacctcgtttactgccgctcgatgcccaacgtcggtaaggttgttcggcccaggcacttcgtcttctaccgggttgcgacagaccaggtgctcgaggtggttcgcgtgcttcacgactcgatggagcttgagcgtcacctggctcgcaaccgattacgttga	MAKYRISHDAQADIIDILRFTQNRFGDAARRRYQALIGAALEAVATDPQQVGSISREELGAGLRSIHLVYCRSMPNVGKVVRPRHFVFYRVATDQVLEVVRVLHDSMELERHLARNRLR
KB-PA_3-chr1	1261967	1261695	-	CDS	Predicted transcriptional regulators containing the CopG/Arc/MetJ DNA-binding domain	atggcaacgcgaaacgtcgtccttcccgatccgctggagcaggatatcaacgagctggtggagaccggccgctatcagaatcgcagcgaagtcatccgggcaggattgcgcctgctgctgcaacaggaagcccagaatagcgccaagctcgaagccctccgcaacgcaacatccagtgggctgatgcaactggagcgcggcgagtacgacgagatcaccagagacgacctggcccactacctcgacgagctcggccaccaggcgagccactga	MATRNVVLPDPLEQDINELVETGRYQNRSEVIRAGLRLLLQQEAQNSAKLEALRNATSSGLMQLERGEYDEITRDDLAHYLDELGHQASH
KB-PA_3-chr1	1262086	1262442	+	CDS	hypothetical protein	atgaacgcgcacaccaacaaaggttttgcctcccgggtcggttttggtctgggtacgcttgtgcgtttctgcctgcatgatcgtcggcctgtcgtgcgctgggtcaagcgagttagcctcttggtggtgttgttcgttatctttgctcagaactttacctggatggccagtgccttcatgaccttattgtcgtttgggttgattgggtgggcgttggttaaaggtgacttttcgatcttccagcagttggaaaaagatgaagcccaagcagctccgtatggacgagatgttttcggtcgagagctgaattcttgggggaaagtcgatagtcagctttttgatcctgatagtgagtaa	MNAHTNKGFASRVGFGLGTLVRFCLHDRRPVVRWVKRVSLLVVLFVIFAQNFTWMASAFMTLLSFGLIGWALVKGDFSIFQQLEKDEAQAAPYGRDVFGRELNSWGKVDSQLFDPDSE
KB-PA_3-chr1	1264019	1262487	-	CDS	putative membrane protein	atgaccttcatgaccaatgactacctggagtattacctcaccctcctcggctggatcatcaacaacgggatctggaacatgatctcggacacgggcctgtttgcggtgccgttcgcggccatcgtaatgcgcgaatggctgaaagttcgcggggaaggcgccgacgagggcaacaagggcgtgctgtctctggcccgcatcgagacgcacatctacgtcggctacatcgtggtcgccctggcggggatcccggtcgtcaacgtgagcttcgacaccatcgagttcgaccagactcgcgcccagcagtgccaatacaatctgccggcaccggcggacaccggctggtcgagctccttcagcagcctggccggcaagagtgcgcagatgccgctctggtgg…	MTFMTNDYLEYYLTLLGWIINNGIWNMISDTGLFAVPFAAIVMREWLKVRGEGADEGNKGVLSLARIETHIYVGYIVVALAGIPVVNVSFDTIEFDQTRAQQCQYNLPAPADTGWSSSFSSLAGKSAQMPLWWAMMHALSKGFTSGAIAAIPCGTDLRQMRMEVDNTRVNNPLLAQEIADFSRDCYGPSRARLFMRQPDLGSVAEDNKALQDLNWIGSRFLLNTPGYYDTDYSKSPRQSWPYNATRDAGLPQVGGGGGYPTCKQWWADSGIGLRDRIKDQVDPDLMTSFLKWAKWLNQDEVSEAVIRQVISPSSQVKGNVYSDYGGQVGGTVWNGLSRTAGTFGVALGSLAYFPAMDMVRQALPMVMSFLKMAMIICIPMVLVIGTYQLKVAMTMTVVF…
KB-PA_3-chr1	1264360	1264016	-	CDS	FIG00953975: hypothetical protein	atggcagatacgctcaccacccgaaagcttctcggtcagctactggtcggagtgctgatcgtcatcggactggcagtggtcggtacgctgctcagcctcttcgccctgaaccacttcggtggcatccagggcctggaggcctggcggcaaagcaactactggagcttgttcgcctggcgggcgctgctgtactgcgccctggccatcgcctggttccggctcaagcagcaggaactgagcgcgcatgagcggcagcgcattcggcggatcgagatcctggtgctgttgctggtcctgctcatcgaattcagcaaagcctacttccgcacgggaggcgcagcatga	MADTLTTRKLLGQLLVGVLIVIGLAVVGTLLSLFALNHFGGIQGLEAWRQSNYWSLFAWRALLYCALAIAWFRLKQQELSAHERQRIRRIEILVLLLVLLIEFSKAYFRTGGAA
KB-PA_3-chr1	1265748	1264360	-	CDS	hypothetical protein	atgcgaatgaacatcacctcggtcgcgctgacgtggctgctcgcagcgcaacttgcccaggccgacgacccaatcaacgtgtccaagaccggcacggtgctcagcgacgaggtcctatacagcattggcggcggcagtgcggtgagcatgggcagcgccggccagatggactcgatcggcgtcggtttcggctggaacaacgacctgatgtgcggaaacatgaacctgagcaccaccctggagaaccagctcaacggtgccacacagggcttccagaacatcatgggctcagtcatccagaacgcgaccggcgcggtcatgtcgctaccggcgttgatcatccagcgcgcgaaccctcagctctacaacctgatcaccaatggcatcctgcaggcgcgg…	MRMNITSVALTWLLAAQLAQADDPINVSKTGTVLSDEVLYSIGGGSAVSMGSAGQMDSIGVGFGWNNDLMCGNMNLSTTLENQLNGATQGFQNIMGSVIQNATGAVMSLPALIIQRANPQLYNLITNGILQARIDYDRSKGTCRAIAEKMADIAGEQTGWGKIAEGQALGATLASGGKDAVSALEVVEKKGGNDGVTWVGGDKAGGSGQKPIRIVNDVTRAGYNLLTSRSVKDSSSVPSASCNNGLVCNTWSSPQEAAAFATRVLGEQQQQTCEGCQKTVTAAGVGLTPLIQETYDKKLQSLQELLSKSKPLTAENLAAAGTDALPITRGVIEALRDERDQDVLARRLASDVSLMDVLSKALLLQRLMFAGAKEPNVAANGLATQAVDQQTSLLQQEIS…
KB-PA_3-chr1	1264407	1300028	+	repeat	repeat region	cctgcaggcgatcgaggcgatcggcatcgggcgccgactcgaacacgccactggaccctgaggcgcgttgttgcccgcgctcgatgacccgcatgggggaattgctggccaactcgcgacggagttccagttcggtcttgagattggagatctcctgctgcaggaggctggtctgctgatcgacggcttgggtggccaggccgttggcggcgacgttgggctccttggcgccggcgaacatcaggcgctgtaacaacagggccttgctgagcacgtccatcagggagacatcggacgccaggcggcgcgccaggacgtcctggtcacgctcgtcgcgcagcgcctcgatgacgccgcgggtgattggcagcgcatcggtgccggccgcagccaggttct…
KB-PA_3-chr1	1266704	1265766	-	CDS	hypothetical protein	atgaccagccacaacctccgccgcctggcagcggcggccgccaccttcagcctctcgttcacggcctcggccgcgatcaacagcgccgccatcgtctcctccaccctttcgccccagtgcctcgaatacaaggtcgtcgggatctgctactggctgctctgcggcccacatggctgcaaggtgaagacgtcggtcaaggtccgccactacgtgcctgacgcagtcgtctccagctatgcgaataccgggagcaacccctggacggaagtgtcggcgctgggcacaccgaatcccctcgcccaggccggcaatgacgcgaccaccaactacaaggccgagaacagcatcggccgcttcaaggaagcggatgtgatcggccatcctggcggggccacgttc…	MTSHNLRRLAAAAATFSLSFTASAAINSAAIVSSTLSPQCLEYKVVGICYWLLCGPHGCKVKTSVKVRHYVPDAVVSSYANTGSNPWTEVSALGTPNPLAQAGNDATTNYKAENSIGRFKEADVIGHPGGATFSRFASASGYVCPGATFPLVPYFLSTLDAIGWRHGIPEQVYPEALVPGLREVGGIFSGDMWGNLYPRSGFLHQTDDYKTAAVIAQRAGDITTRIGQLHVYLPMRAAPKDGYWPAGELKEGDASTGKWQELTPSLSLNCAVFPNSGPKTQAVDGDYAWALWRPYSCCQRKGQIFLGSTDFQ
KB-PA_3-chr1	1267135	1266704	-	CDS	FIG00962909: hypothetical protein	atgcctcttcatcactctccccctggctggcggccacaaacgctggtcgttggcttactactggtactgctgagcggcgcgagccaggccgaaacctgggtcatcaccgacaaggctcatccggtcaccgccaccggatcatcgcgagtcctgctcctggatgcccagcagcaccttgaggagcagctgactgacgctctacccaaggatcctcaacaagctcaggcagcatttcagcagttactacaaagccctgcggggcgacgcctgcaggcagaactggttaaggcacaacaagacgtcgccgatgcgtggagtctcggtgtcgagaagatccctgccgtggtagtcgacaggcagtacgtggtctacggcgagccggatgtaccgcgcgcgctt…	MPLHHSPPGWRPQTLVVGLLLVLLSGASQAETWVITDKAHPVTATGSSRVLLLDAQQHLEEQLTDALPKDPQQAQAAFQQLLQSPAGRRLQAELVKAQQDVADAWSLGVEKIPAVVVDRQYVVYGEPDVPRALELIAKARRSR
KB-PA_3-chr1	1267295	1267414	+	CDS	hypothetical protein	gtgcgggtggccacttggcatcggcggattgcgacgctctatttcgtgagcatgttcttcgaacagatttggttggatatctatttaatcttcatggagggaagccatgacagcttttga	MRVATWHRRIATLYFVSMFFEQIWLDIYLIFMEGSHDSF
KB-PA_3-chr1	1267401	1269503	+	CDS	hypothetical protein	atgacagcttttgaaggtgacttgcaagaggagttggtactccgattctcccataatgtattagagcatttaggtttaaagctctatcagaataagcctacgaatgttctggctgagttggtttctaactcatgggatgcttacgcaaataatgtatggattgacatttccaatacctccggaggggcgccaagactaatagccgtagccgacgacggtcatggaatgacacacacatcgttgagggataactacctagttgttggaaagccaaaaagagacgagggtgaagttaataagggtgtaagggaaggtttcgctgaacgtaagccgatggggcgaaaaggtattggaaaacttgctccttttggagttgctcgccttgttagcctcataacg…	MTAFEGDLQEELVLRFSHNVLEHLGLKLYQNKPTNVLAELVSNSWDAYANNVWIDISNTSGGAPRLIAVADDGHGMTHTSLRDNYLVVGKPKRDEGEVNKGVREGFAERKPMGRKGIGKLAPFGVARLVSLITVSEGMATWLTFNYEGMLKSEGDYKSFSEYKPDILASNVPLASVDSSLAGEGAKYVESFKRRLGDDGSGTLILAGDLTLRRAILAADLMESLGRRFTVTLCRPDFKVWVNGEELQESHAFPAWYLRIPESGSKTAVVQTPDGSREVSYWVGFVKEASWPQEQAGVGVYAHGKIAQDRAFFFGVKGSEIFSRYMYAVVEADWIDELEYDAISTDRTSINWDDPNFEGFYSWGASSVKDWVKEYQKALKLSAKEEGGKLIDKVVVDKSL…
KB-PA_3-chr1	1270743	1269490	-	CDS	DNA-cytosine methyltransferase (EC 2.1.1.37)	atgcgacgagtaagatatcccgccttcattgctggctcacaacgaagaaagaaaaaaaactttaattttgtcagcttattttctggtgctggcataggagattacggcctacaccttgcaggcggagtgtgtttggctgcctgcgagatagacacccaaagagctgccgtacatactgccaacttcaaaaagcatgtatggggtgacatccgcaaagaaaaagtcaagatagtagaaagtcttaaagataaaaacatagacctaattattgcgacccctccctgtcaaagtttcagcactgcaaactccagaaggggacttagagatgatgcagagcatgcaaaaggagatgagagaaacagcctttttttcgaagcactttatataataagagaacta…	MRRVRYPAFIAGSQRRKKKNFNFVSLFSGAGIGDYGLHLAGGVCLAACEIDTQRAAVHTANFKKHVWGDIRKEKVKIVESLKDKNIDLIIATPPCQSFSTANSRRGLRDDAEHAKGDERNSLFFEALYIIRELNPSFVLFENVPNFLMKKIKCEEEKVTSRVHEFIEASLQDYQSWQGNICFSKFGVPQTRKRSLAFFARRDLKINKDQLAPNNWLAKIDGAPSCILEAISDLSPLDGISPTVARDESDPLHQVPVYSHKHYSWIAGIPAGSGKSAWENNCLNCGFSAAPIFTVHCPSCLEPMKNRPHVESKNGEIRAIKGFKTSYKRMKPNELANTITTSSGTFSSDVKLHPLQNRVLSVRECARLQTIPDSFKWPQVLEYRKAHLFREMIGEAVPPL…
KB-PA_3-chr1	1271570	1270899	-	CDS	Protein-disulfide isomerase	gtgagactgttgaagggcggctgggcagcgaaacgatttcaaggtcccgccctgccctgggcggggctgctgctgatcttgctggctgcatccgccataggggtagagcttctggtgaaggggctgccagccaaccacagcctctacggcgatgcgaaagcgcgctggacgatcaatgaatacgctgacctggagtgccccttctgcaaggtctacaccccacgactgaagcgctgggtagacagccatccggacgtgaacctggtttggcggcatcttcccctgcagatgcatggcgaggcggcccgccaccaggctcgcctggtggagtgcgcggggatccaaggcggcgccaaagccttctggagcgctatcgatgcgatcttcgctcagtcggcc…	MRLLKGGWAAKRFQGPALPWAGLLLILLAASAIGVELLVKGLPANHSLYGDAKARWTINEYADLECPFCKVYTPRLKRWVDSHPDVNLVWRHLPLQMHGEAARHQARLVECAGIQGGAKAFWSAIDAIFAQSAGNGGGLPGGTLDFPELDQSRLEKCAKDNELVDSSIKSDIDIARSKGITATPTLVIQDNQTKRSVKLEGMADETTLLSAIDWLATLEAKSD
KB-PA_3-chr1	1271851	1271567	-	CDS	hypothetical protein	atgagagctctgaattcgctgacccagaacctgatcgacaacctgacccagatcctgcagaaccccgaagaagatgccctgcagacgctcaggatatgcgctcctgtactgatcgaggagctgcagcagattcaactgagggcggtcgatcgccgggacattgtcccgcagataaagcagctcctggatgaatggctgcaacagcatccacagcctgatacggcccaacaggcgctcatcgaggccgtggaccgtgcggagatcctacagcggaggcaagcgtga	MRALNSLTQNLIDNLTQILQNPEEDALQTLRICAPVLIEELQQIQLRAVDRRDIVPQIKQLLDEWLQQHPQPDTAQQALIEAVDRAEILQRRQA
KB-PA_3-chr1	1274790	1271848	-	CDS	Type IV secretory pathway, VirB4 components	atgagcctctttcaaaatcttctgcgcggtcgcacacagcctcagtcggtaccggcagacgctcccgaagattcaggagcgctggacgtagcggccgcggaagaagcgactgagcgctatctggcgcgactggccgccatgggtattcctctgcccaacaccgggagcaagaatggcgccacgcaggctgaagcgtcacgcctctacgatcacgacccatcgttcgtcgacctgctgccctgggctgagtacctgcccgacgagcaggtgatgctcctggaagatgggcgttcgcgcgccgcgttcttcgagctggtgcccttgggcaccgagggccgcgatcccaattggatgcagaacgcccgggacgcattgaaagaagccctgcagaactccttc…	MSLFQNLLRGRTQPQSVPADAPEDSGALDVAAAEEATERYLARLAAMGIPLPNTGSKNGATQAEASRLYDHDPSFVDLLPWAEYLPDEQVMLLEDGRSRAAFFELVPLGTEGRDPNWMQNARDALKEALQNSFDEHETSPWIVQFYAQDEISWDNFQEQLRQYVHPRARGSAFSEMYLALMKHHLEGISKPGGLFVDTAVSKLPWRGQQRRVRMVVYRRIRKADAQIRGQDPAAYLKSICERIQGGLANAGIVASRMGGQEIRNWLIRWFNPHPDHLGKTDADLRRFYELVCRPDEPILQDELPLADGTDFSQNLFYRQPVSDATQGVWLFDAMPHRVIVVDQLNKAPLTGHFTGETLKGDGLNALFDRMPEDTLLCITMVVTPQDMLEGHLQQLSKKA…
KB-PA_3-chr1	1275233	1274790	-	CDS	putative lipoprotein	atgcaacagcagacctggactaacccccttcttcgtctctgcgccggcctggcctgcgcgctgaccctggtagcgtgttccaccagcaaggaggagatgctgccccacggcgaggccaacatgctcgacgtctgggagcaaggtgcaaccagctcgataggtaacagccgtggccggcttctcctcgatgccaggcaaacgctgcggcgcccgatcgatccgcaacaggctgcctccgcgaatgaccaggccgactacacccgcacggctagcaacgaaatacacagccagttcaaacgactgcccaatcccgacctggtcatgtatgtgttcccgcacctggccggcagcgatcccgccccggtaccgggctacaccaccgtgttccccttctaccaa…	MQQQTWTNPLLRLCAGLACALTLVACSTSKEEMLPHGEANMLDVWEQGATSSIGNSRGRLLLDARQTLRRPIDPQQAASANDQADYTRTASNEIHSQFKRLPNPDLVMYVFPHLAGSDPAPVPGYTTVFPFYQRVQYAMPGERTEDY
KB-PA_3-chr1	1276716	1275211	-	CDS	hypothetical protein	gtggcgctgaccggtaatcccctcctgaaattgctggtcatccccgtcgtgatcggcgccatcctgatcggcgtgagcatgatgggcaagaaggaaagcgcgcagtcacaaggcgccgcaactccgacggtaacgtcggaagaagcggcaaccctgggcatcgacggcgacacgcccgccgacacactacgcaccatcgtggcagaaagccggcagctcaaggaccagatcagcaaggtgatccaggagaatgactcgctcaaagccgccaatgagaacctgcagggccgcctgcgcaacatcgatcagaacatcgagcagaagctcaacaacaccgcccaggagctgcagcaacagcaggagaaccgtagccagacgatcctggaccaggtacagaaa…	MALTGNPLLKLLVIPVVIGAILIGVSMMGKKESAQSQGAATPTVTSEEAATLGIDGDTPADTLRTIVAESRQLKDQISKVIQENDSLKAANENLQGRLRNIDQNIEQKLNNTAQELQQQQENRSQTILDQVQKRLENLTHIPETGDTDLPVGFGVRPEDGQHFQGAGSSSSDIVWIEPQDARAVDANGQPLAAGSTTQPSGFSFPTSFGNAVDRGQNALERIDDGLHPVGQQRSDLENRKLVRKTYTLPQNSTLMGSVAMSALIGRVPVDGTVNDPYPFKILIGPDNLTANGIELPGVAGAVASGTASGDWTLSCVRGQIRSLTFVFNDGTVRTFPAPAEEVNDNQSNNNQTASADQKTIQGGLGWISDPYGIPCIAGDRRSNAKEYLGNQSLLTAAGA…
KB-PA_3-chr1	1277302	1276700	-	CDS	hypothetical protein	atgctcatcgatatcgccgccaccgaggcagcggccgaccaacagccgcgcgagccggtcaggatcgtcgccggcgagcccgtggctccgcactatggccagccccgggaagcccagccatcggcagcagcgaaacagaccgagcaggcagaagcaccgaaggccgtgccgcgcgaaacgcccgtccccgtggttctgacgcgctatgcggcgcagatgctctatgccccgcttcgcacggtggaaccggtggatggcgtcggtcaggtgcgcgtcaagcgacagctcgacctgaccaccctgctccccagcctacccatcacggctaccgccttgggcgcctggcggctggacgactactacgtcacggcggtgaagctgcagaacgccaacgcccag…	MLIDIAATEAAADQQPREPVRIVAGEPVAPHYGQPREAQPSAAAKQTEQAEAPKAVPRETPVPVVLTRYAAQMLYAPLRTVEPVDGVGQVRVKRQLDLTTLLPSLPITATALGAWRLDDYYVTAVKLQNANAQHLALDPRDLMGNFVAATFQHPYLGARGDASDTTTVYLVTRGRGLADALLPSSISQIDPKGGRRGADR
KB-PA_3-chr1	1278070	1277582	-	CDS	hypothetical protein	gtggtgggacattccgccagagagtgtctatgcattcgtctctacatcttccagcaggtgcaacgttggcccaaggacggcgaggtggactacaagggaaacctgttccgctacgccgcctacctcactccctcctgcaaagtcttcctggagaaagacttcgagtttcgtcgtaacgccggcgagctcaggggacgcgagcgcaccacctcggaaatccccggtcgaggcattggcgagagcaatggccgcgtgatccagcactcgatcaatgactggaccgtcaacctggacatggacagcacggagtattacgccggcgagaagatcaagcgggcgctggcccgctacccgttgcacgttatccgcgccgacgtcgacccggagactaatcccttc…	MVGHSARECLCIRLYIFQQVQRWPKDGEVDYKGNLFRYAAYLTPSCKVFLEKDFEFRRNAGELRGRERTTSEIPGRGIGESNGRVIQHSINDWTVNLDMDSTEYYAGEKIKRALARYPLHVIRADVDPETNPFGLQWDCYSDTPQRIELEEPAAPTKREGGL
KB-PA_3-chr1	1278621	1278280	-	CDS	FIG00953508: hypothetical protein	atgcccgaagaacatctgtttcaggatggaaccctcagcttcctgccgacccgtttgaaccggcaaccggtggtcatcggcggccctgaccgcagacgaaatgtggatcacggtcttcaccagcggagcagccggttcgttcttggcatcccggctgccttggtcgcaggtaacgctgcctgcattccactgggcgcgctgctggtcggcgccctcggcctgggtatcggcagccgcgtcctgcggcggatgaagcggggcggcccgatatctggttctaccgccaggtggagctggccctctcgctgcgctttcccgtcttcggcaatcgtcacctggtga	MPEEHLFQDGTLSFLPTRLNRQPVVIGGPDRRRNVDHGLHQRSSRFVLGIPAALVAGNAACIPLGALLVGALGLGIGSRVLRRMKRGGPISGSTARWSWPSRCAFPSSAIVTW
KB-PA_3-chr1	1278620	1278829	+	CDS	FIG00956406: hypothetical protein	atgggaaggcccttacatgatggtggtggctttggtgacgagataaatgatcaagatcagcaggccgacacctacggctacgcccgctccgagatccgaccacttcttcttcccgtcatggatggcgtgataggtgccgtaggtatgccaagcgaccccagaaagacagccgcgcagatgagcagcgcgaggagcatcgctccgtcatag	MGRPLHDGGGFGDEINDQDQQADTYGYARSEIRPLLLPVMDGVIGAVGMPSDPRKTAAQMSSARSIAPS
KB-PA_3-chr1	1279120	1279004	-	CDS	conserved hypothetical protein	atgtacagcacctggcgcggctgggccaccaacaacctcgacagcgccaccgccggcgcttccgcgatccggatcttggtcctcctcggcatcacctctttcttcctcctcagctga	MYSTWRGWATNNLDSATAGASAIRILVLLGITSFFLLS
KB-PA_3-chr1	1279457	1279314	-	CDS	Candidate type III effector Hop protein	atgatccggcagctcaacgccctcgaggacaccgcccgccgcagtgcccagggcgccgatgagcccggacagcgcttctacttcgactactcacgcctggccgctgactgcagcgcatccgccaaggcctgcaggactacatga	MIRQLNALEDTARRSAQGADEPGQRFYFDYSRLAADCSASAKACRTT
KB-PA_3-chr1	1279895	1279593	-	CDS	Aconitase B	atgttcaaacacaaagaagacaccttggaacccgacgaccacgccttgctcaaccctctgcgctgggccgaggtcgtgcgtctgggccaggaaggctgggagctggtgagcgttcagccactcatgcggggcgtaaccgagatcggcaatcaaaacgcccaaggctgggcttgggcgtcgctctgcccgtcagctacctgctgtttttcaagcgcgcaacctcataaaaaaataccccggacccgcgccgagtatttcttgcggaatggaatcagggcgatcggcaagctgatcgcaccctga	MFKHKEDTLEPDDHALLNPLRWAEVVRLGQEGWELVSVQPLMRGVTEIGNQNAQGWAWASLCPSATCCFSSAQPHKKIPRTRAEYFLRNGIRAIGKLIAP
KB-PA_3-chr1	1281361	1280213	-	CDS	Putative DNA helicase	atgcaagaccgcccacagcctggctcatgcggtgtacggcatacagtacgcccacaagaaacgaagaacctgcgtcttaccgatatcgcccgcggactcgatacccaagactgggagttggtacgtgacgtgctggccacgctgaacaactacatggctagcgccgacgcggaactcggccgaccgcacttcccgcgcttccgcgacaaggcgttcctcaccagtgcccaggaacgcttcctcaagcagggcctggacatggcgcgagtagtctggaggcgcatggtagatctccaggacaccggcatgctgatgccccatgacggctacctgaagctgtatcaactgagcaagcccgatttgagccagcgcttcgactgcatgctcttggacgagggg…	MQDRPQPGSCGVRHTVRPQETKNLRLTDIARGLDTQDWELVRDVLATLNNYMASADAELGRPHFPRFRDKAFLTSAQERFLKQGLDMARVVWRRMVDLQDTGMLMPHDGYLKLYQLSKPDLSQRFDCMLLDEGQDINPVIADIAHWQRIRMAIVGDPHQQLYRFRGAEDALNSDWMAGAEEHYLTQSWRFGPAIAHVANIILSYKGETRKLQGLGSQTLVKKSLPPDLPHRTFIHRTVIGVIENALQLVRNHPEPKFHWVGGIDSYSLRDLEDLYAFSRGLRQNVQNKKLLRDYRDYTQYVEIAEISQDGEMLRSIKIISTYPDLPARIIELRSLTLDDELDATITLTTAHKAKGLEWDFVCLYDDFNADRWPPTPTRQARR
KB-PA_3-chr1	1281557	1281363	-	CDS	putative DNA helicase	atgcagtggactcacgaacagtcaccgatcatccagtcgaaggcatcgaagatcctggtgcgggccttcgccggcactggcaagaccaccaccctggtgggctttgccaaggcgaaccctaccctgagaatcctctatctctgctacaacagctcggtggaaaaggccgcgaaggcaagtttccccgcaacgtag	MQWTHEQSPIIQSKASKILVRAFAGTGKTTTLVGFAKANPTLRILYLCYNSSVEKAAKASFPAT
KB-PA_3-chr1	1282426	1282307	-	CDS	putative membrane protein	ttggacgctctacctggcaatcccatcagcatcaaccccttgctcatcctgctgccctgcgccgcgctgctcggcgtagcggtgtgcatcacagcatccaccttcaagaaatacctctag	MDALPGNPISINPLLILLPCAALLGVAVCITASTFKKYL
KB-PA_3-chr1	1283054	1282437	-	CDS	putative membrane protein	atgatggctgaagtcactcaacgtgcagagcagcaacaagagagccagaagaccctggtcggcaccatcatcagtacgcccttccaatttctcggcgtgatgttcggttcgctggtcggcgcaatcatcgtagagtgggtttgcctgtatttcttctggcctgacgcgggctggaagcatgcccaggcaatgttcgagtacgaactcagttggctgtcgcagggtctgctgcacagcgtcatcgtgcaggagccaggtcgaaccgccacctggctggcccagttggcctatgactggttgttcgtgaagaccgggatagtcgactggatgaccaacatgaccaccatcgcgcaggccgggccacggagccctctggacgttcgctatctcaccgcccag…	MMAEVTQRAEQQQESQKTLVGTIISTPFQFLGVMFGSLVGAIIVEWVCLYFFWPDAGWKHAQAMFEYELSWLSQGLLHSVIVQEPGRTATWLAQLAYDWLFVKTGIVDWMTNMTTIAQAGPRSPLDVRYLTAQGVSTLQNYGLAALYTVLTFVVRLVILVMTIPLFLMAAFTGLVDGLVRRDLRKFGAGRESSYLYHKARGSIIP
KB-PA_3-chr1	1283211	1283044	-	CDS	Type IV secretory pathway, VirD4 components	atgccgaaaagcctgcaggagctggctgccggtatgcgcaagggccaggccgccaacagcgagtggtgggagcgccgggatactccgccctgcaggatggtctgccccaggacctggtcgacgatttccgtcacctcggcgccggtgaggatgccgcatgatggctga	MPKSLQELAAGMRKGQAANSEWWERRDTPPCRMVCPRTWSTISVTSAPVRMPHDG
KB-PA_3-chr1	1283495	1283211	-	CDS	Coupling protein VirD4, ATPase required for T-DNA transfer	atgctgcgggtgcgcgagaccgccacggccgaactcctgaccaaccagctccccaaggtccagatctacaccagcacgccggcgagcggcgccaacgacgcaatcaacaacaagaaggcagccttcacctccagctcgcacgaccaggtgcagatgaccagcgtgccgatgctcgagccggcccacatcgttggtctgcccaaaggacaggcgttcgcgctgctcgagggcggcaatctctggaagatccgaatgccgctgccggcggtcgatccgacgaggtga	MLRVRETATAELLTNQLPKVQIYTSTPASGANDAINNKKAAFTSSSHDQVQMTSVPMLEPAHIVGLPKGQAFALLEGGNLWKIRMPLPAVDPTR
KB-PA_3-chr1	1284600	1283647	-	CDS	Coupling protein VirD4, ATPase required for T-DNA transfer	atgggtcggcggacccagacggttcaccacggctatcgcggccggcgcgcagaggagcagccggactacgaggtggtgatcgtcttcgacccgaaaggcgatgctgacctgctcaagcgtatgtacgtggagtgcgagcgtgccggccgcctggatgagttctacgtgttccatctcggtcatcctgacctgtcggcacgctacaacgccgtcggccggttcggccggatctccgaggtcgccacccgcgtcgccggccagctctccggcgaaggcaacagcgcggcgttccgtgagttcgcctggcggttcgtcaacatcatcgcccgcgcgctgcacgcgctgggtatccgcccggactaccagcagatcctccgccacgtcgtgaacatcgatgcg…	MGRRTQTVHHGYRGRRAEEQPDYEVVIVFDPKGDADLLKRMYVECERAGRLDEFYVFHLGHPDLSARYNAVGRFGRISEVATRVAGQLSGEGNSAAFREFAWRFVNIIARALHALGIRPDYQQILRHVVNIDALFVEYAQKYISEHDPRAWDTIIQIEGKLNDKNIPFNMKGRPLRVVAIDQYLTQKRIADPVMEGLKSAVRYDKTYFDKIVASLLPLLEKLTTGGSRSCFRPTTRTSTIRGRSSTGCRSSANAPWSTSASTHYRIPRSPPRWATPCSATWSRWRVTSTSMVSMTACPARSLAARSASTCMPTSSTS
KB-PA_3-chr1	1285279	1284677	-	CDS	Coupling protein VirD4, ATPase required for T-DNA transfer	atggctggccagtacccgctggaagcgctcttgcggcctgccgtggagctctacaccaccaccgtgtgcttcaccgcggccgcgctctgcatcgtcgcgccgtggacgttcgccctcactccgctgttcggcatcgtggccgcgctgggcttcgtctggctgggcgtcgtgcggctgaagcaggccggcgtggtgctccgctaccggcggaacattcgccgactgccgaagtacacgatgaccagcgccgaaatgccggtcagcaacgaacacttgttcatcggcaagggctttcgctggacgcagaagcatacgcagcgcctggcagatacctacctgccccagttcgcctcctacgtcgagccctcgccgctctacgagcgcgcgcgccggctggag…	MAGQYPLEALLRPAVELYTTTVCFTAAALCIVAPWTFALTPLFGIVAALGFVWLGVVRLKQAGVVLRYRRNIRRLPKYTMTSAEMPVSNEHLFIGKGFRWTQKHTQRLADTYLPQFASYVEPSPLYERARRLEKQLEFAPFPLKLVAKATAWDVAWNPARPLPRGRFASAPWHRAARTGRRPATGRARRPHTGTRHYEGR
KB-PA_3-chr1	1285551	1285291	-	CDS	COG1088: dTDP-D-glucose 4,6-dehydratase	atgactactcacctgatcaccctggtcatcaagcagccgagcgacgctcaggcacgccaactcatgtaccaggagttgctcggcctgatctcacgctacggcggtgaggtgacgtccacggccctcgaggacgaatcgaccctctgtgagctgctggagcagatgctgcccgatcatgaggtagagcaagccaggaaacaggtgctcgaacttcatgccaagcgccgccgaccggccgcctgcactcgccggcaagcctga	MTTHLITLVIKQPSDAQARQLMYQELLGLISRYGGEVTSTALEDESTLCELLEQMLPDHEVEQARKQVLELHAKRRRPAACTRRQA
KB-PA_3-chr1	1286058	1285558	-	CDS	hypothetical protein	atgaagaagatccttgccacgctggcattttgcacggcgttcgcgactcaagcctgggccgccgggctgatcgttgtcgaagacctcggcggagcctcagcgctcccctactaccagggcctggatccgcagccatccgctgccacaccaggacctggcgacctgggtgtccgtggctcaggtgcgtttccagttcgctcggcacgcctttcgccaggccaggttcaggggcgcgccatcaacgccccaggcctgcaacctctgttcctcgtcggcgacgacacgctgtctcgaacctggctgaaagagcgaggcgacgagctccgaggcctccacgctgtgggcctggcagtgaacgtggccagcgaagcgcgcctgacggaaatccgtgcctggggg…	MKKILATLAFCTAFATQAWAAGLIVVEDLGGASALPYYQGLDPQPSAATPGPGDLGVRGSGAFPVRSARLSPGQVQGRAINAPGLQPLFLVGDDTLSRTWLKERGDELRGLHAVGLAVNVASEARLTEIRAWGKGLQILPAPADDLVDRLGLRHYPALITSTAIQQ
KB-PA_3-chr1	1286435	1286055	-	CDS	Soluble lytic murein transglycosylase and related regulatory proteins (some contain LysM/invasin domains)	ttgaacgtcgccgggaaatcctactactacgcgacccgcaccgccgcctgcacagcgctactcgcggcaatcaacctctacggggccaagagcgtcgattccggcctcggccaggtcaatatcggctggaacggacatcgtttctccagcccctgcgactccctggatccgtacaagaacctggacgccacctccgacatcctgatcgagcagcgggacgccctgtatgcatccgccccgggaagaccggtggactggatccaggttgccggccgctaccaccgccccgccggcggcgcgcctgccgccaaataccgtaggacggtatcccgccaccttagccaagtcctcggcgtcaacctactggtgaccaatccatga	MNVAGKSYYYATRTAACTALLAAINLYGAKSVDSGLGQVNIGWNGHRFSSPCDSLDPYKNLDATSDILIEQRDALYASAPGRPVDWIQVAGRYHRPAGGAPAAKYRRTVSRHLSQVLGVNLLVTNP
KB-PA_3-chr1	1286924	1286619	-	CDS	probable exported protein STY4558	atgagcccagcgttgcagagcagcgggcgcctggccctgttcgtccaggacaactgcaccgcctgcatccagcgggtgcgcgacctgcagcagcagaacaaggagttcgatctctacttcgtcggtagccagaacgacgcagagcgagtgcggcactgggcaatcctcgccggcgtcgacccgaagaaggttcgcagcaagcagatcacgctcaatcatgacgagggccgctggatggccctgggactgggcggggcccttcccgccctggtccaggaggtgaacggccgatggcaacgtctgtaa	MSPALQSSGRLALFVQDNCTACIQRVRDLQQQNKEFDLYFVGSQNDAERVRHWAILAGVDPKKVRSKQITLNHDEGRWMALGLGGALPALVQEVNGRWQRL
KB-PA_3-chr1	1287373	1287203	-	CDS	probable exported protein STY4558	atgaacagaaccgtatcgctcctgtccggcctggtgctgctgctgagctatcccgcagtcggccaggaggctgcggcaagccgagaggccagcagccagctgtccggtagccaactcgacacgctgaacagcagacatctcagagcgacctggcccaggagtggggactga	MNRTVSLLSGLVLLLSYPAVGQEAAASREASSQLSGSQLDTLNSRHLRATWPRSGD
KB-PA_3-chr1	1287644	1287384	-	CDS	Methyl-accepting chemotaxis protein	gtgccttccctgtcaagcccaagccaagccgaaacccaagccaatcgagcctccgcccttctcaatcctcggcgtggagtatcgcggggcgaacggtttctgtcggttgcacctccgggatccacccagctcagccagatctacctcattcgccagggcgatgccgtcgccggcacgacctggcgactgaccgaccttgacgatcgtaccgcgcacttcgacgtcgccggcgcctcgcgcagcgttcgcatccaaccatag	MPSLSSPSQAETQANRASALLNPRRGVSRGERFLSVAPPGSTQLSQIYLIRQGDAVAGTTWRLTDLDDRTAHFDVAGASRSVRIQP
KB-PA_3-chr1	1287893	1287666	-	CDS	Methyl-accepting chemotaxis protein	atggacaagcacctggtcagcaacgaggacttccgctcaggccagcaggcactgtccaaccgcattgacgccgcgcaggccttcgccaagcaggcctccgacgccgtcgagaacctggctcaaccaccgcctcggccggcgatctcctggtgctcaaggctacagtggagacgctggacggttctgtccgcacgctgcaagagaagcaagccaaggctccgccgctga	MDKHLVSNEDFRSGQQALSNRIDAAQAFAKQASDAVENLAQPPPRPAISWCSRLQWRRWTVLSARCKRSKPRLRR
KB-PA_3-chr1	1288079	1287924	-	CDS	Methyl-accepting chemotaxis protein	atgaaacgcccatcccctgcatcaatgattcttggcctctgcttgacggcaatggccggcctgctgagctaccagcagtaccaactcattcagctccgatcaggcgtggacagtgccgcggaaaagacctcgctagagcgatcctggctcgcttga	MKRPSPASMILGLCLTAMAGLLSYQQYQLIQLRSGVDSAAEKTSLERSWLA
KB-PA_3-chr1	1289865	1288531	-	CDS	hypothetical protein	atggccaaggatgaaaagtacaagtggaatatttccaccgggacatatcctcagattgatccccacagcaagatcaaacacaagataattcaggactatattcgctcctacataacggtcgtgatgagcaaccagatgatccctcgaataggaatcagcatcatcgatgggttctgtggagggggtatttacaaagacgatgatggtataggcatccactatggatcgccgatcatcgcgttggagaccgttcgccagacagttgcggaaattaacaccctgagaaaacaagaccgcgaagtaattgccaagtactattttgtagacatcaaaaaggacaacatagattatctgaacgcagtacttaacgcgaaaggatattcgcacttaatagacaag…	MAKDEKYKWNISTGTYPQIDPHSKIKHKIIQDYIRSYITVVMSNQMIPRIGISIIDGFCGGGIYKDDDGIGIHYGSPIIALETVRQTVAEINTLRKQDREVIAKYYFVDIKKDNIDYLNAVLNAKGYSHLIDKDVFPIKSRFTNALPALINQIKKLKFSQRAIFLLDQYAYKDVPFSSIRAIFQEVRNAEVLLTFNVDSLIDYLSEREENRKALQNIDLEKYIPWAKLPSFKATMRHEWQHLIQRFLAEGILKESGAEFMTVFFITPFGANPRTYWFIHLAKSYRANAVMKEIHWKYGNHFSHAMTPALFVGYDTKRDIQVTDQQNLGFGEEHFFDNVTGKRIERELSELLPRQIYQQPVQTFEDMMKSMANSTMANESIVREALHMPILCKDIEVYDK…
KB-PA_3-chr1	1290626	1289883	-	CDS	Bacteriophage protein gp37	atgagtacccagacgagcatagaatggacagaaatgacctggaaccccattgtggggtgcaccaaggtatcgccgggctgcaaacattgttatgccgagaacatggcgcaccgactgcaggccatgggcactccaggttatgaaaatggtttcaagcttagcctgcgtccagagaaacttcgcgaaccgcttcagcgcaagaagtcgactatctattttgtaaactccatgtcggatctgtttcacgagaaagtccctgaccattacatcgatcagatttttgacgtcattcgtgaggcgacgcaacatacctttcaaatcctgacaaagcgcgcggaacgattggctgactacttcagcaagcgcgttccacctaccaacgcctggcttggagtatcg…	MSTQTSIEWTEMTWNPIVGCTKVSPGCKHCYAENMAHRLQAMGTPGYENGFKLSLRPEKLREPLQRKKSTIYFVNSMSDLFHEKVPDHYIDQIFDVIREATQHTFQILTKRAERLADYFSKRVPPTNAWLGVSVEDKAYGVPRIDCLRRVNATIRFLSAEPLLEDLGEIDLTDIHWVIVGGESGAKARPMQQEWVDNIHRQCDISGSAFFFKQWGGWGADGVKRSKKANGRLLNGQTWDEIPLLNLA
KB-PA_3-chr1	1292049	1290859	-	CDS	hypothetical protein	atgtctttgatgccgatagaatatcagggcagagaacaggcatacgtcaagcacaccattctgagaacttacttgcagcggctgatcatgatcatcggccgcagtgagaaggtgatcaattacgtcgactgcttcgccggcccctggtcggaagagtctgatgacttgcgggacacctccattggtatctcgttgagcctgatgaaggattgcgcgaagacgcttgaagagcagcatggcgcaaaggtgagattccgcgccctgtatatcgaaaaaaacgacaatgcttttgcgaagctgcagagattcctttccaacgatacgggcagtgtcgtagacgccagctgcatgcacggcgactacacgacgaaaatcgaagatatcgcaagctgggccaaa…	MSLMPIEYQGREQAYVKHTILRTYLQRLIMIIGRSEKVINYVDCFAGPWSEESDDLRDTSIGISLSLMKDCAKTLEEQHGAKVRFRALYIEKNDNAFAKLQRFLSNDTGSVVDASCMHGDYTTKIEDIASWAKLGFTFFFIDPKGWRKVINAPVLAPLLALNRAEFLINLMYDFLNRAMSMTAQQANIEELLGKAITFSGKESATERRQIIVSQYRQAVGDIYNGKTAYVTVERPGMDRVLYFLIYLTRHSKGLIVFKEAAEQMDMVQRVSQFETKLRRQSSKRLPVNDLFSSPEDQPEPVNVRDNRMLAKKYLLTRLSATPLLVDNDCWASFLEETDLYPTDLQLAFKDLAKEGKIINLDADVRKRTKNPVRPHWPRKSERWVLCAESFSPKEIF
KB-PA_3-chr1	1292644	1292417	-	CDS	Mobile element protein	atgaggaccgacttcgtcctggatgcgctggagcaagcattgtacgcccgtcagccgcatcgcaccggtggcctgatccatcacagcgacagaggcagtcaatacgtctcgatccgctacaccgagcgactggccgaagccggtatcgagcccccggtcggcagcaaaggtgatagctatgacaacgccctgaccgaaaccattaacgggctgtacaaggctgagtga	MRTDFVLDALEQALYARQPHRTGGLIHHSDRGSQYVSIRYTERLAEAGIEPPVGSKGDSYDNALTETINGLYKAE
KB-PA_3-chr1	1295049	1292800	-	CDS	Superfamily II DNA/RNA helicases, SNF2 family	atgaacgctcagacccaaccggccgccctggccgcctcctccctgaacatcaacctgaccgacttcatcgacgagttcggcgacgagctcctggagtcgctcaatcgctccaaccccccggtctataccggctccgacaacgctcaccgccagttggtgatggaccgactcaagcgcaagcccttcgcggcccaggccgaggtcgtccaggccatcaccgccctgctgctggaccgtaacgagcaggccgggatcatcaacgccgagatgggcaccgggaaaaccatgatggccatcgctgtcgcagcggtcatgcacgcggccggctatcgccggaccctggttgtctctccgccgcacctggtctacaagtggcgccgcgagattctggagaccatc…	MNAQTQPAALAASSLNINLTDFIDEFGDELLESLNRSNPPVYTGSDNAHRQLVMDRLKRKPFAAQAEVVQAITALLLDRNEQAGIINAEMGTGKTMMAIAVAAVMHAAGYRRTLVVSPPHLVYKWRREILETIPAARVWVLNGPDTLLKLLKLRDQMGDAYDGRQEFFILGRVRMRMGFHWRLACWKKRAAGGQLLAACPDCGQVLEDLEGNLVTVEEFERGDRRRTCSSCRGALWTLIRPGKPDGGNRRATILKSMCRIPTIGPVRAERLLNDFGEDFLATMLVDNVSEFINLMDAKGDFVFSDRQAKRMERSMANIEFGFGEGGYQPTEFIKRQLPNGYFDLLVVDEGHEYKNSGSAQGQAMGVLAAKARKTVLLTGTLMGGYADDLFYLLFRILTQ…
KB-PA_3-chr1	1296599	1295154	-	CDS	FIG023873: Plasmid related protein	atggccctcatgttcccgcgcttggcgcgcaactttgcacgcaacggctacttccctaccgatgaggtcaccctcgaacgcgctctgcaagccctcgctcccgccccgtcgggcaggatgaggatctgtgatccctgcgccggtgagggggttgccctggctgaggcagcacacatcctcggccgcgacaaggtccaagccctcgctgtcgagtacgaccgcgagcgcgccgaccatgctcgaggcttgcttgagcgagtgctgcacagtgaccttttcgacaccatgatcagcaggcagtcgttcggactgctctggctcaacccgccttatggcgacctggtggcggaccactccggtgcgtcgcagtaccagggcagcggccgcaggcgtctggag…	MALMFPRLARNFARNGYFPTDEVTLERALQALAPAPSGRMRICDPCAGEGVALAEAAHILGRDKVQALAVEYDRERADHARGLLERVLHSDLFDTMISRQSFGLLWLNPPYGDLVADHSGASQYQGSGRRRLEKAFYQRCLPLLQYGGVMVLIVPHYVLDDELTGWLSNHFTGLRIYAAADPTFKQVVIFGIRVRRQDLARADANQVRSRLQAIGAGQEKAEEIPAAWPWEPYVVLPATSELEHFYRVTLEPEQFAGEIQRLRGLWPDFNLHFAQAGLQPRPPVRELSRWHLALALAAGAISGVVRSKSGRILVVKGDTYKDKARKTEFTEDEDGNITEVRILTDRFIPIIRAWEMTPSSVNQGRVLTISSSAATTEEAEEPQPEPAPEPLLFSPGQVV…
KB-PA_3-chr1	1297234	1296629	-	CDS	FIG026997: Hypothetical protein	atgcccagtcccaccccgctctaccagatcgaagaatgcccagacctgtacgttgacgcctgcgtgtgcgacgagcagcgcaacctggtctttctttcggcctggggccgcgacaccgtgacacaagagttcctggccaggctgacgctggaccgggaagaaaatggcatcgaccatttccacattatcgtggacggccggcgcttacctgtcttcccaaaccaggatctcctggagaaacgcaccacccgccagttccgcggcacgttgttcggcagcctgctcaacctctggctgttcgatcggcgcgcctcggcgcccgaccgaggcaatcacctcgccttcgcactcctgcagcgcgatgaggatccacaccaaaggctctggccgctggtgatg…	MPSPTPLYQIEECPDLYVDACVCDEQRNLVFLSAWGRDTVTQEFLARLTLDREENGIDHFHIIVDGRRLPVFPNQDLLEKRTTRQFRGTLFGSLLNLWLFDRRASAPDRGNHLAFALLQRDEDPHQRLWPLVMETCPLPLLQHWREPVMEVLTQHQMLTALPGTIGNVCAWRLALRVDVLEPTLGELIRESILTTDAQAQA
KB-PA_3-chr1	1297587	1297327	-	CDS	FIG041301: Hypothetical protein	atgaacccgctgttcaccaacctcacccaggaaaccctcgcttacctcgaggaccaactgtccaacaacgacgtcgccggcgacgacgagctcatcgacctgttcatcgaggagctgtcgctgaccttggagcaggcggaagcggctgtcgcgctacgcgatcagtacctctgccaggtcttcctggtcggccaagggccgctgcaccgtcctgaagccgatgggctcagcttcgaccctcacaccaagagcgttcggtga	MNPLFTNLTQETLAYLEDQLSNNDVAGDDELIDLFIEELSLTLEQAEAAVALRDQYLCQVFLVGQGPLHRPEADGLSFDPHTKSVR
KB-PA_3-chr1	1298017	1297655	-	CDS	FIG046709: Hypothetical protein	atgggatggcttttctcacatcagacgaaggaagacctgctgcgtgagctgctggccccaaccagtactttcgcaggcagcaccaaggtgctggcacacgcagtctccggcaatgaactttggactgtcgtaaaacgaaccttccaccttgccggattctatttcggcaagccggccggtcactcgatcaccatgatcgagctgcacttgctggactgctcggccgggcaatggggctacaagaccattccagaaagtgccggcccgttctactacggctgtccgctggagttcctggacctggctcacgatgaggtcaaccaggagtggcgtgaacgtctgacgcacgaacaccaagcctga	MGWLFSHQTKEDLLRELLAPTSTFAGSTKVLAHAVSGNELWTVVKRTFHLAGFYFGKPAGHSITMIELHLLDCSAGQWGYKTIPESAGPFYYGCPLEFLDLAHDEVNQEWRERLTHEHQA
KB-PA_3-chr1	1298362	1298087	-	CDS	FIG00957911: hypothetical protein	atgaaatcgatctacaacaccccaggcttcagcgaggagttgttgctggtttgcgcctcgctgcgcgaggtcggactggacaatctggctgaccagttccgcgatgcagtgttcgaccgatccgtcgtcgaccaggccatcatcgcactgcgtgagcgggtgaagaccccttcgccggagcatgcggccgacaacgagccatggctgtactgcgactggcaggccaggcaaacagcttaccggctcctccagcgccttgagcgcgcaacacgctga	MKSIYNTPGFSEELLLVCASLREVGLDNLADQFRDAVFDRSVVDQAIIALRERVKTPSPEHAADNEPWLYCDWQARQTAYRLLQRLERATR
KB-PA_3-chr1	1298991	1298359	-	CDS	FIG034376: Hypothetical protein	atgatcaacatacccggccagttggccattcgaaccatcaacggtcgcaatggcgagttcaacgtgggaaagctctcgacctcgatcggggagttcgtcatcaaggacgctctcctggaccagcacatcgaaggcaagtaccgcggtgatttcgccatcaccgagatccgtccctcctactacaccaccggcggccggctggtcgtcgagatccgcgcaaagctggacagcatgacgctggacgacgtggacaacctcagcgacgaggaggcagagcgtctctctggcaatgaggtggatccgctcgacgaagtgcccgcgatccagcagcccacagtagccccggcggtaccgccgaagtcgccccagaaaccgaagcctctgcgccccgctgcaaca…	MINIPGQLAIRTINGRNGEFNVGKLSTSIGEFVIKDALLDQHIEGKYRGDFAITEIRPSYYTTGGRLVVEIRAKLDSMTLDDVDNLSDEEAERLSGNEVDPLDEVPAIQQPTVAPAVPPKSPQKPKPLRPAATGEDAPFGMSPPAPAEQAATPDTDADAELFGTVWPLGEIVKLDTTVDRKRLRQQCVRLGALGYELDFKQQVWTRKEAA
KB-PA_3-chr1	1299398	1299048	-	CDS	FIG00960315: hypothetical protein	atgacctctctcaacaaccactccagcgcaggccacactgctgcgtacctcaaactcccgatcgttctcaccaacgcggcctggctgcgcctggtctatctcgccaaccctgccagggtcgacgagatgggcacccggctggccagtgtcgttcaaaccgcctggcaggagctttcgctccagccgaccgcgaagcacatccaattccacctgtaccacaaggaggaagaggggcaggaccgcgcgctcgcgctgctggtcctctcgatagtcgagccgtccgatgagccttcctacctgcgcatcgagctgcaggaagaaagcctcccgggcaacccggataccgagtag	MTSLNNHSSAGHTAAYLKLPIVLTNAAWLRLVYLANPARVDEMGTRLASVVQTAWQELSLQPTAKHIQFHLYHKEEEGQDRALALLVLSIVEPSDEPSYLRIELQEESLPGNPDTE
KB-PA_3-chr1	1300347	1299634	-	CDS	hypothetical protein	atgactcaatataatccgtttatccacggctatactgacttcagaatcgagcgaacgctacagataacatacgaagatgattgccccccctgctatcgcgcgttgcatccatcgcagcaaatcctctccgatactcaactacagtgctttccatgcatcttcaatgacgacttcgccctagttactgaaggtcgagagatcgatactgcactttctgaccgctgtccttacaacggtctggtgcgcaatgtgctctacggcatccttgccgagcaggacggtcagcaaaagcacataggcgatctgtattccttggccgaagcccagagtgtcgttcgtcacctttcgttcggtggcggttacaaccgctgctgggagatcagaaaaacacatctaccc…	MTQYNPFIHGYTDFRIERTLQITYEDDCPPCYRALHPSQQILSDTQLQCFPCIFNDDFALVTEGREIDTALSDRCPYNGLVRNVLYGILAEQDGQQKHIGDLYSLAEAQSVVRHLSFGGGYNRCWEIRKTHLPISAWNSLYERFSTKMPIRLPSVLVSLFWCNEHGAVGFRLHNTPWTDECLEILEMTAAALRQEQLAFGLDEHLVDLLHLAGQADIRFLVLDPFAPTLKGLPLYDD
KB-PA_3-chr1	1300538	1301838	+	repeat	repeat region	cttaatattcccgttgcgaccacgtgccgttgtctaatgcctgttgggcaagttcgcgggaggggtagtattcaaccgactcgcgcgaagctggtccttcttcatcaagggtgccgatataaaagccggcgttggacataagaacctgcagcggcagttcgagacgaagatgggcgagtgcccgctttccgtattgcatggtgattctcctttcggtaggaaacaccagtcccaaggggactgaggtcccctaaatgggaaatgtctggcggttaggccaaggcagatacctgggcattgttgctggctaggaacagccaggcgaagttgcagaactgactgctgagcagcagctcgtcctcgacgtcgctgaggctaacctcctctacttccggcagg…
KB-PA_3-chr1	1300736	1300539	-	CDS	hypothetical protein	atgcaatacggaaagcgggcactcgcccatcttcgtctcgaactgccgctgcaggttcttatgtccaacgccggcttttatatcggcacccttgatgaagaaggaccagcttcgcgcgagtcggttgaatactacccctcccgcgaacttgcccaacaggcattagacaacggcacgtggtcgcaacgggaatattaa	MQYGKRALAHLRLELPLQVLMSNAGFYIGTLDEEGPASRESVEYYPSRELAQQALDNGTWSQREY
KB-PA_3-chr1	1300968	1300810	-	CDS	FIG00955915: hypothetical protein	atgagcaatatccaaatcgtagatctgcccgccctgccggaagtagaggaggttagcctcagcgacgtcgaggacgagctgctgctcagcagtcagttctgcaacttcgcctggctgttcctagccagcaacaatgcccaggtatctgccttggcctaa	MSNIQIVDLPALPEVEEVSLSDVEDELLLSSQFCNFAWLFLASNNAQVSALA
KB-PA_3-chr1	1301594	1301106	-	CDS	FIG051360: Periplasmic protein TonB, links inner and outer membranes	atgagcaacaacacccaagcccaagaagccaaatatttcgacctgcacaccaccggtatcggctacctcaatcgcatccgcgaagtaccgatccgccgaggtgaaccgttcctcgccgctactgttgctgccctccatggcgcggcagacagcgtggaatactcctacatcgattgcaaagtggtcggcgcccaagctgaaaagcttgtccgccgttgcaaggaagcagtcgaggccgagaagaaggtgctgatttctttccgtatcggcgacatctgggcggatcccttcacctacgagaaaggcgagaaaaaaggccagtccggcgcaagcctcaaaggccggctgctcttcatctcctggatcaaagtggatggcaccaccgtctacgatgcgaag…	MSNNTQAQEAKYFDLHTTGIGYLNRIREVPIRRGEPFLAATVAALHGAADSVEYSYIDCKVVGAQAEKLVRRCKEAVEAEKKVLISFRIGDIWADPFTYEKGEKKGQSGASLKGRLLFISWIKVDGTTVYDAKEEAEKAQQGQGEPQGESAAPAEHAEQAAA
KB-PA_3-chr1	1302051	1301917	-	CDS	hypothetical protein	atgagccaaacgactttcggcgtgatcatgctgaccgccttgcttgtagtgtgcttgtcgatggcggcctgggccgattggcccaacctcaagcgcaagcttacgaagtttaaccatcggcaccgcccgcactga	MSQTTFGVIMLTALLVVCLSMAAWADWPNLKRKLTKFNHRHRPH
KB-PA_3-chr1	1302232	1302053	-	CDS	hypothetical protein	atgggttccgcaaaactttccgcaatcgcagaagatctacgcaagattggaaccacggcggtagccgctggtttgatcggtatttttctcggcgagcatcgcatcctgactgcccttgcgctgtcggtaggtgtggtaatctggtctacaggtatctacctgactcaggaggaatcttga	MGSAKLSAIAEDLRKIGTTAVAAGLIGIFLGEHRILTALALSVGVVIWSTGIYLTQEES
KB-PA_3-chr1	1302230	1314552	+	repeat	repeat region	catggttttcctcgaaaaatgccggaaaaccaccctgcgggatggttcccggcagggttgggggtggtagcagtggctattagcggccgagagcagctacttgttcatccgtcatggtggacaagtagtcctgccagcgttggtggtattgctcctgagtacgccgatggagttcccaagagactgcgctaccaggaggtgctggcaaaagagcaatctcatgatcgttcagggactctaactggagagggggcctccccatttcgctttcggagttgggtgcaatcaaatggtcgagggaacccatcttgagctccttcctgactggcgtttcagctttggcggtcgccttggccggcttgggtttgcgtgcgcgcttgggcttttgcacctcgcgcg…
KB-PA_3-chr1	1302875	1302309	-	CDS	hypothetical protein	atgtccaagcaatccaccagcttcgaaatcggctttgccctcggcagtgttgtgcgtgagttccgcagagcgctcaggcgccctccggtcgtagtgcaagcacaagcgccggttgcgttgagcgtccagcgcatcgatcctgccttcctggccggcccgaccgctggcgagctagaacacatcagcgacatcccagccatcgtccggctgaagaatgtcaacctgaatgactggtatctagccaatacgcgcgaggtgcaaaagcccaagcgcgcacgcaaacccaagccggccaaggcgaccgccaaagctgaaacgccagtcaggaaggagctcaagatgggttccctcgaccatttgattgcacccaactccgaaagcgaaatggggaggccccct…	MSKQSTSFEIGFALGSVVREFRRALRRPPVVVQAQAPVALSVQRIDPAFLAGPTAGELEHISDIPAIVRLKNVNLNDWYLANTREVQKPKRARKPKPAKATAKAETPVRKELKMGSLDHLIAPNSESEMGRPPLQLESLNDHEIALLPAPPGSAVSWELHRRTQEQYHQRWQDYLSTMTDEQVAALGR
KB-PA_3-chr1	1304234	1303797	-	CDS	Conjugative transfer protein PilM in PFGI-1-like cluster	atgccgctgctctggattgccctattgctcaccctgctcaccggaacctggctgagtgtacaaagcgaccacgcgacctcgagcgccgaactggccgaggtcgataccctggccaggagcttgctgctctaccgctccaggctggcggagtacgcacacgccaaccccggtttcagcggttcgccggcggactccgctcttggtttaccggcctggttccgcaagccagcgcggcttcagggctacatcgccgccgacaccagctacgccttcatcgcctcgccgccggcagggctggcggcagccgtggatgccggtacggaatccgacctagttggtgtcaggcgcaacggccagttagtcacgcgccgcctcggagccactgccattgcgctccct…	MPLLWIALLLTLLTGTWLSVQSDHATSSAELAEVDTLARSLLLYRSRLAEYAHANPGFSGSPADSALGLPAWFRKPARLQGYIAADTSYAFIASPPAGLAAAVDAGTESDLVGVRRNGQLVTRRLGATAIALPAPIPEGAVVAVK
KB-PA_3-chr1	1305631	1304252	-	CDS	hypothetical protein	atgaataacaccaagctcaaccgcggctttatctcgatcgaattgatgatcgccctggtcgtgatcgcaatcgcgactaccggtggcatctcagtcttgatgagctacctggacggcctgaatgaacagcacgcggcccagcagcaacaacaggtggccaaggcagcggagaaatacctgaaggacaacttcagcacggttctggccagcgccggcgccacggccccggcggtgatcaccgtcccgatgctgcgcaacacccgctacctgcccgcaggcttcagcgacaccaacatcttcggccagcagtaccaggtgcgggctcgcaagcccgccgcgaaccaactcgaaacactgatcgtcaccactggggggcaggcagccccggagatgtcgatc…	MNNTKLNRGFISIELMIALVVIAIATTGGISVLMSYLDGLNEQHAAQQQQQVAKAAEKYLKDNFSTVLASAGATAPAVITVPMLRNTRYLPAGFSDTNIFGQQYQVRARKPAANQLETLIVTTGGQAAPEMSIRRIAQLMGAQGGYISKANTGIAQGAAWQVALSNFGSDPGAGHLATALFFQDGAIANEYLYRNSVPGHPELNRMNTALNMGGNNIAAAGAITASGNITTSADISARNMTATGTVKAGTADISGETYTGGWFRTRGNSGWYNEKWDGGWYMSDSAWVRSWMNKSVYTGGELRGGKLTSEGRTTVGEYLQINGLAAENAGCSPNGLVGRDNSGPLFCTDGLWKRPSGVNIATPVVLAQYPADNRPRTHCQAVSRDALINGSGPGVLRLE…
KB-PA_3-chr1	1306580	1305624	-	CDS	Conjugative transfer ATPase PilU in PFGI-1-like cluster	gtgagtgtgaacccgatcgtccaggctcagttcgtcgacctctacctcggtgaaggcttcgccgacgtgaaaggcctggccggctccggcgcgcgccgagtcgaagtgcctcgcgagtgggagtcgcacgcccaggaactgctacagatctgccggcaaacgctggaggagctgcaggatcctgagttcgccatcgtcgtcgacggcgtgctactgcgcgttacccaactggaagatgctttcaacggcgggagtgtcttcgtgctgcgccggtcgacggcccaagtcagaagcttcgaagacatcggctatccgagcgaagtggtctccgccctgatggatccgcagttgcagggcctggtcctgttctgtggcgatatggcgaccggaaaaacctcc…	MSVNPIVQAQFVDLYLGEGFADVKGLAGSGARRVEVPREWESHAQELLQICRQTLEELQDPEFAIVVDGVLLRVTQLEDAFNGGSVFVLRRSTAQVRSFEDIGYPSEVVSALMDPQLQGLVLFCGDMATGKTSSAASLILARLQTLGGVGFTVEDPQETNLSGQHGLGRCIQVRTSRRSGGYSEALLRTLRTGADLVLIGEIRDEDTAYQACKASLNGNLVISTIHAKNCPQAIERLITLAKPLASNAYDVVAEGIQAVICQELVSDGAARRLHAEPLLFTSVDSVAMRDKIRRQQIHLLEDDVNRQARRSLWEPTYE
KB-PA_3-chr1	1307107	1306577	-	CDS	Conjugative transfer protein PilS in PFGI-1-like cluster	atgagcaccacgcaacgcacttcccgtccgacgcagggcggtttcgtttccatcgagatgatcatcgtgctgatcatcatcgccatcggggtcggcctgggcctggccgcagcggctgggatgttcagttcgtccaacgccaacgaggaacagcgcaacatcagcgttatcgcggctaacgcgcgggccctgaagacctcttcgggctacggctccagcggcaccaacctgatcccgagcctgatcgcaatcaacggcgtgccgaagaacatgagtgtctcctccggcgtcgtctacaacgtctacggcggatcggtcactgtctcgtccaccggcatgggcttctcgatcaccaccagcaagttgccccaggacgcctgtatcacgctggccaccaag…	MSTTQRTSRPTQGGFVSIEMIIVLIIIAIGVGLGLAAAAGMFSSSNANEEQRNISVIAANARALKTSSGYGSSGTNLIPSLIAINGVPKNMSVSSGVVYNVYGGSVTVSSTGMGFSITTSKLPQDACITLATKIAKNTFEQTKINSGSAITGEVTTAAATQACSSDSNSITWTYSS
KB-PA_3-chr1	1308208	1307129	-	CDS	hypothetical protein	atggggggcttctgggagcagttgcagttcgccttctacagcaagcagttcggccgcaaggagcgcctgcagttctacgaaagcatgtccaccctgctcgaaaacggggtcccgttgaaggatgctgtggcagaggtgcacaagatcttcgctcatgaggggcagcatccgtttcatccggtggccatcgccagtcgcgaagcgctgatggggctgtccaacggcaagcgtctggccaccgccatggcgctctatctccccgcccaggagcgagcgttgatcgaggccggcgagatgagcggcaacctggttcaggccatgggcgatgccgtctccctggtcgaggcccaggccaggatccgcgccaccatctggcaggcgctgctttacccctcggcg…	MGGFWEQLQFAFYSKQFGRKERLQFYESMSTLLENGVPLKDAVAEVHKIFAHEGQHPFHPVAIASREALMGLSNGKRLATAMALYLPAQERALIEAGEMSGNLVQAMGDAVSLVEAQARIRATIWQALLYPSALSAMMVFLLCIVAYRMVPSLARLSDPVTWTGPLATLNAIASFVTGPGIYVLVAVITLTVVVIVTLPTYRWKGRVWLDRTLPPWSIYRMLQGTTFLLNMAVMLNAGIRPYDSLASMIKISPPWLKQRLEAARYGVGLGQNLGVALRSAGHDFPDRQAIQYLCILANRGGFSEALVKFSRRWQETSLKQIELAAGLVKNFALIFIGALMILVLLGAYQAQQLIQSMNH
KB-PA_3-chr1	1309788	1308208	-	CDS	IncI1 plasmid conjugative transfer ATPase PilQ	atgacgaaccttcagattgccgcgcttgcgcagccctccatggtgacccaactgctcaccgccgacggtggtgaatgggaggtatcgaagcacctgcaggaaatcatggccctggccgccgacggcacgctctatctatcggagagccaccagaacgacatacacgttctgtcgttcatcgaccgtctcgatcgccgtggcttccgataccagctcaaccttaccgacctgcagaccattcaccagctataccgcgccgtcgccatggacggcctggtcgatagcgatggccagcgcgccacccagatgcaggagcgcgtggtcaagatcattcgtaaggccactgagctgcgcgccagtgacgtgcatttcgtcgtgagtcccgccggcaccggcagc…	MTNLQIAALAQPSMVTQLLTADGGEWEVSKHLQEIMALAADGTLYLSESHQNDIHVLSFIDRLDRRGFRYQLNLTDLQTIHQLYRAVAMDGLVDSDGQRATQMQERVVKIIRKATELRASDVHFVVSPAGTGSKIRFRVDGLLKTVEQFRSQELHELCATIYQSMCDVAEPLFKPQLDQDARMSQTFVEKLNLFGARIATRPRAGGFLMILRLLYDDTGLDSLEQLGYLPEQNALFDRMMRMPYGINILSGPTGSGKSMTLKVTMEGLDKLHGGSKHILTIEDPPEYRIRGEGINQTPLVYDATDPDAERQAWAAGIANGMRLDPDYMMIGEVRDLFAAVAAFRGAMTGHGLWSTLHTNSAIGIVQRLKDLGVDPGLLFDPALLTGLINQSLLPKLCPR…
KB-PA_3-chr1	1310330	1309797	-	CDS	Conjugative transfer protein PilP in PFGI-1-like cluster	atgcgaactgagccgatcggcatggccgtggccgtgctcttcctcctcgcgtccggccaggcctgcgctggcaccgttggcgaacttgcggagatccaggcccaggccatcctcaccgaggccaaggtgcgtctggccacggcgcagcggcaattggaaggcaaaggcgaaaccggccaggtcgtcagcgcccaggggcagacgttcgccatgccggtgccggcggcgccgccgacgatcacgcagccggttccgccagtggtgcggaccatctacggcgccggaggcaagatgactgccacgttcttgttcccgggcgggtacgaggttgacgccgccagcggcgcggagctgccgggcaactaccgcgtcgagtccatctcgctggaccaggtcgtg…	MRTEPIGMAVAVLFLLASGQACAGTVGELAEIQAQAILTEAKVRLATAQRQLEGKGETGQVVSAQGQTFAMPVPAAPPTITQPVPPVVRTIYGAGGKMTATFLFPGGYEVDAASGAELPGNYRVESISLDQVVLTDKDGNRVPVGFSSVAPSQASSTAQGASVPPALPGAVPQPFIQ
KB-PA_3-chr1	1311645	1310320	-	CDS	hypothetical protein	atggagaagcctgacctcggcagtcgtggcccagacgtctcgatcctgagctaccacggcaacaagttcgtcagcggcctgttctggcggccgctgtccagccagcggcagtacatgaaggaagcgcgcaagctgggcaaggaagagcatctggacatcgttgccatccgccattcgccaacggtgatccaggccggcttcgtttcgaagtcgcaaggcgcagtcaagggcatgtactccctggcctcagcgctttcaggccagttcgacggcgacttcctggcctgctggaaagtcgacgaggaccgctacgcgctggtcgccacgctcgatggcgcgattgtccccgggcaggatgtggtcaccagcctcgacgaggcccgggaccgggtcaggaag…	MEKPDLGSRGPDVSILSYHGNKFVSGLFWRPLSSQRQYMKEARKLGKEEHLDIVAIRHSPTVIQAGFVSKSQGAVKGMYSLASALSGQFDGDFLACWKVDEDRYALVATLDGAIVPGQDVVTSLDEARDRVRKLSTRGVLRNAQVFVPEGFDFPVKNFDIEELLAPKRLQRDYRLRQLTFGLSAREWTAVALLGCLVGGSLTAYYLWNAHQEELARQAALLEEQRRLAELAEKNAQAKQPLDLASLQKPWTLMPDLEDMLRACSKATGVLSLSIQGWLFESSKCDGRVLVATYHRTGNSTAADLTAASQHLFADRPAFVIDNGNTAALKVDLKVAIGSDEPLLPADDVLQALTSHLYRQGVEPKLSISQETTPPLPGAEAATEQQVVLPSWKKFTFSAQ…
KB-PA_3-chr1	1313358	1311649	-	CDS	Conjugative transfer protein PilN in PFGI-1-like cluster	atgcgtgcccccctgaagaacctcttgccttgcctcctgatccccgcactggccagttgctcagtcacgcgggtgaacgagtcggctgatcgtgtcgaagctacggcagattccgcgtctacgatcgcagcccaggtgcgcaacacccgaccggatcggcgcgatacggtggtgttctccgacaaaccctgggtcagcacgaaacccctgagcgtttcgcacaccttgtccagtgactgcatcgtaacgtggcgcccttcaggcgcagcgtcgctgcaggaggccgcccaggaagtcatcaaccaatgccacatggcggtcagtatcacgcccgacgcgctgaacccggccgccttcgccctacaacctcagcagcgcgcgagcaacgccccgccgccc…	MRAPLKNLLPCLLIPALASCSVTRVNESADRVEATADSASTIAAQVRNTRPDRRDTVVFSDKPWVSTKPLSVSHTLSSDCIVTWRPSGAASLQEAAQEVINQCHMAVSITPDALNPAAFALQPQQRASNAPPPIQGGQDMATMLFPASVANGMSLGAGGSMGSSFGSYGPRSLYNIKWNGKVSGFLDLIAARAGVSWRYNPTEKRVEFYYLDTRTFRIYAFDDVNTVDSTVRSGMTTAAGISGDGSGSTGQNGSSGISGDSGSKQTTSSELKTSILSDIENSINSMLTPSMGRMSLSRATGTLTVTDRPEVLNRVQQLVNRENESITKQVLLNVNVLSVALTDKDQLGIDWNLVYKSLNNKWGIGLKNTMPGIDQSAISGSVSILDTANSAWAGSKAMV…
KB-PA_3-chr1	1314482	1313358	-	CDS	hypothetical protein	atgaccaggcagttgaccactctcacgctgtgcctgctgctcgccagctgcacgacccacaaggctgagccggccaggccagccttcgacagcagccgcaatccagacctgctctccccggacctgtatccaaacggcgtgcagccggagaaagagcccgtcgtgcgctacgggcgctacaccctggtcagcacccagcctgatgccggtcaacgcgacctgatggcccagatcatcgacgtaaccatcccgtcgagcatgaacccgagcgtcaaggacgccatgcagtacgtgatgagccgctcgggttactcgctgtgcccggcagacgccggtcatgtgaacatcctctacacccggccactgccggcggctcagtacaagctcggcccgatgacc…	MTRQLTTLTLCLLLASCTTHKAEPARPAFDSSRNPDLLSPDLYPNGVQPEKEPVVRYGRYTLVSTQPDAGQRDLMAQIIDVTIPSSMNPSVKDAMQYVMSRSGYSLCPADAGHVNILYTRPLPAAQYKLGPMTLRNTLQVLSGPAWQVKVDEVARQVCFVLRPGYQLPPAPRPKPVQQLYAKLAAPTPAAVAQPSSTEKVSTLESPVVVASVPTPAPITTSPAPAKKPESTTVLPPAAPAKDGHPSSPPAASAPTKPAASAVKSTPPTPPTVASAPPVKVLTPTEPSRPLAQAWSAETGSTLRDTLEAWAKRARWTVRWEPQDLNYPIEAPLTFHGSFEDAVSELFPLYDAAERPFLVNASRPQSLIIIKERKN
KB-PA_3-chr1	1314864	1314983	+	CDS	Phage-related protein	gtgtacttccagcagcgcgggacggaaatcgtcatcctgctatgtggtggagacaagagcagccaggccagggatatagaaatggcgaaacgcctggcaaatgagtggaggccgcaatga	MYFQQRGTEIVILLCGGDKSSQARDIEMAKRLANEWRPQ
KB-PA_3-chr1	1314980	1315270	+	CDS	Addiction module antidote protein	atgaccgagcaaatttatgattatgaccccgcgcaagcgctggacagcccggaggccatggctctgttcatcgcagacgccttggatactggagacaccgcctatatcgctaaggctatgggagtcgtggctcgcgccaaggggatgacggagttggccaaggaaacgggtttggccagggagcagctttacaaatcgtttagtgagcgcgggaacccgacattgaaaaccatgctggcagtaatgcgagctttgggcgttgatctgaccgcccgcccgcatgctcagtga	MTEQIYDYDPAQALDSPEAMALFIADALDTGDTAYIAKAMGVVARAKGMTELAKETGLAREQLYKSFSERGNPTLKTMLAVMRALGVDLTARPHAQ
KB-PA_3-chr1	1315688	1315353	-	CDS	hypothetical protein	atgagattcgagcagccctcaccgactatcgactacagaagaaatatggtgctgcaagcattgctgaagatcgaggcgctctacgagctcgcgcatgccgcctctccagagctgctagcgaatattaaggaggcgctggccgacccagatagactttgcgaaatggcgacagcaatcgccttatattaccttcaccgggaacctacagttccagcgctatacgtagaactcgtcgaggatgaagttgcacgctaccccttcacctacgatgagatagagtcagtgatgaactcaaaggttagggaagtcctactccctaggtatgagcattgttga	MRFEQPSPTIDYRRNMVLQALLKIEALYELAHAASPELLANIKEALADPDRLCEMATAIALYYLHREPTVPALYVELVEDEVARYPFTYDEIESVMNSKVREVLLPRYEHC
KB-PA_3-chr1	1317803	1315827	-	CDS	DNA/RNA helicase in PFGI-1-like cluster	atgaaccgtccacgcctgatcaaccgtacctccgcgacaccttcgacgcttctgcagcgggcgatcttcgacggctacgacttcggcttgaagatcccctacatcgcaggcagcaaccgcgcgctgctagagctgtccggcttcttcatcagcgcccgggagcatccgttgcaccgctactggcgggtccccaaaggcaagctgctccctgaactggacactctgtacaaccgtctcgccgagctcgctggaggccttcactcccagtcctggcgggagttcagctccttggtcgaatccgcgcaggcctcgcttgaccgacaggccttcacctgggggatgctgctgcgcatcgcgcccctggccgagggcggcgtcctactgtcaggcgagttccat…	MNRPRLINRTSATPSTLLQRAIFDGYDFGLKIPYIAGSNRALLELSGFFISAREHPLHRYWRVPKGKLLPELDTLYNRLAELAGGLHSQSWREFSSLVESAQASLDRQAFTWGMLLRIAPLAEGGVLLSGEFHPGVVAVARRMRGVFLRPSSSWRIDTTPELLRSNLILELGLAEEQFEILDTVQELLSDGSFAPSTELPSMSIGGPQQEPAAPSLEDESASDIYLAAVPEIERTEYSSADIEAALQGYSLLAHQPDGIAHLLQRTSALLADDMGLGKTRQAVIAASIRAAGKPILVITLATLLINWQREIQEVYPSATVAIQQDTPEAQWILVNYEQLSPLVANASRFAVMVIDEAQRMKEPTAQCTRHGFDIAAQVPNRYLLTGTPVLNRETELHTL…
KB-PA_3-chr1	1315855	1326317	+	repeat	repeat region	agcgcacggtttccgtcgacctgcccgggctcgatgaggtcttgggcaacctggcgtttcgcgttgagcagttgccacagttgctcgtcgatcgtggcctcgaccagtgggatcttcaccacgaccatgcggagctggccgtttcggtacgcgcggtcttcggcttgttcctgctgaccgggagtccagggcaggccgaggaaaaacacgtagttcgccgcagtgaggttgttgcccgtccctgcggccgccgtagtgcagatgaacacccggcagtcgggatcctgctggaagcgatcgatcgccttctgccgcttggtgagagagtcattgcccaccagcgtgacgcagccgagcccggcctgctcgcaaagttccttcagcgcagccacggtcggc…
KB-PA_3-chr1	1319689	1317800	-	CDS	hypothetical protein	gtggcaccactcgacaacgcctcccctagcgggccgctacaggatccattccttgcccgctacagcgagcggcagctcgccgttgccaacacctgggcaacgcatttctccctcgctgggacagctcgaaccaagttcatccgtcactacctgcgcagcacctctacgaccaggtgctggtgcatcaccgtcgctgcagacaacggtgtgcgttacaccatcatgcgtgcagggccactactccaggtgttcgacggtcaactgatcggtgcgtgggagtgcaagcctacccatcgtatcccggcaagcacgccgtccccagcaggggcgttgaagctgctacagcgccttgagaagttcgacgacgcagttgctgtactcagctcatacaccaagcga…	MAPLDNASPSGPLQDPFLARYSERQLAVANTWATHFSLAGTARTKFIRHYLRSTSTTRCWCITVAADNGVRYTIMRAGPLLQVFDGQLIGAWECKPTHRIPASTPSPAGALKLLQRLEKFDDAVAVLSSYTKRAHDLATQMARDDLGLPHRLVYPSHSNKRYYAPRHQFYLKQIGAVLRTFRQVLDQDLLFAIRSVRCLSPQLYNWLAQGNQVRRLQMLKAQPVLTPLLVDCEEGVWPYTMTNDNGESIHHYLPCPFSLIDSERPQAAAMPCDLYLDMGRILGQVADEGISVINFFAWLFQAPRASIRFLSHVSPGHAGGALFHRKREGRHSGWHALLLAASLGNRRPITRAQWTAFYAAYNAIPWQIHNAKPDYNRLFNGCPSDWQDPAWLAITARLS…
KB-PA_3-chr1	1320761	1320009	-	CDS	Haemophilus-specific protein, uncharacterized	atgaacatgcaaaccagcaccgacaggaacctcaatttcgactttgtgcgcaggcaagtcgagcaaccgcctgcttgggcctctgaggtcctgctgtcatgggaggaagcctacccccaggaaaagcacgccttccttcaaagccactactggaccgagacgggatcgatcaatgtgttccgcgtcgtgggtacggaccactgggattaccaaggaaggtcctggctcgacttcctcactggcggcaagcgaatgcagcgaaacctgcaggccttgctggacaacccgagctactacctgcagccaacggagcgcaggcccgcgatccactacaacacgctcgatggcttgagcttctacgtcggctccgacggcaaccaccgcacctgtattgcccga…	MNMQTSTDRNLNFDFVRRQVEQPPAWASEVLLSWEEAYPQEKHAFLQSHYWTETGSINVFRVVGTDHWDYQGRSWLDFLTGGKRMQRNLQALLDNPSYYLQPTERRPAIHYNTLDGLSFYVGSDGNHRTCIARFFLAEQQKSQLHDVTLNHYQVNDSFYRLYGQLRQQLLLQGLPVQIHPERVQLGREDTAGWKMDTYQTTLNWLNLKTQEERSLNEAQARAQLIDLMRGKPSEEQPRGWKARLKCLISG
KB-PA_3-chr1	1322688	1320769	-	CDS	DNA topoisomerase I (EC 5.99.1.2)	atgcatcttgtaatcattgaagccccgggcaagctgaaaaagctgaggtcccttctcccctcgattcgtcccgacgtgacctggcaggtcgaggcgacagccggccacatcagagacctacccgttcacggccaggatccgcagatgctcaccgtcggcgtgggccaggatttcaaaccgcactaccagatcctctcgggcaaggaaaaaaccgttgcacggctgaaggagctccagcagaaagcgctggagatctacgtcgcatccgacccggatcgcgaaggcgaaagcattggctggcacatcctccaagctgccgggatcaagaactacaagcgcgttgccttcaaagaaatcacaaagtcatgcatcaccgccgaactcagctcgccgcgtcgc…	MHLVIIEAPGKLKKLRSLLPSIRPDVTWQVEATAGHIRDLPVHGQDPQMLTVGVGQDFKPHYQILSGKEKTVARLKELQQKALEIYVASDPDREGESIGWHILQAAGIKNYKRVAFKEITKSCITAELSSPRRLDLPKVASQECRRVIDRLVGYLVTPELRRVMGRPTTAGRVQSVAVYLVVLREREIRAFTAIKYFGVELTFVSPSDGRTWTAEWDPVPVFASKEFPYVQDRQLAELVGAIRNVIVETCIDGEETDTPPAPFISSSLQMAAGNALKWSPDKTMKVAQRLYEQGLITYHRTDNPNISKDSMPDIRAVAKALGLKCVEQQRMFKADQDAQEGHPAITPTDWMAASAGETADEQALYQLIRVRALASQIEAAVYAVRTITLLGVGPDKKPL…
KB-PA_3-chr1	1323001	1322804	-	CDS	hypothetical protein	gtgtcaaagaaagcgaccgataccgacaagctggacagacgacacttcaacgatccccaccggactgtacgggctattggtgctgaggccgcgcggaaagggctacgggtgttcgactgcccctacagtcatcctgcgatgcgggcgtcctggttgaaagggtttgctcaggagcagcaacagcagctcgacttctga	MSKKATDTDKLDRRHFNDPHRTVRAIGAEAARKGLRVFDCPYSHPAMRASWLKGFAQEQQQQLDF
KB-PA_3-chr1	1323431	1323078	-	CDS	Putative transcriptional regulator (ACLAME 282)	atgatcggaaatcgactgagggaagaaaggcttcgactggaaatgagccaagacgccttttcacagcactgtggggtgaagaagaacactcagatttcgtatgagaagggacggcgcagtcccgataccacctatctgcttaaagccatcgagatcggagtcgacgttctatacgtagtcactggccgacatgttccagcggcggtgaaagcgctcactcaagagcagctggatatcctcaattacatgtccggaatgtccgagcaaaatcgcgccgatctcgttcgcgtgggaagggcaatgtatgacgccaaccagtttcgaaggatggcgcctgcaaactccctgtcttaa	MIGNRLREERLRLEMSQDAFSQHCGVKKNTQISYEKGRRSPDTTYLLKAIEIGVDVLYVVTGRHVPAAVKALTQEQLDILNYMSGMSEQNRADLVRVGRAMYDANQFRRMAPANSLS
KB-PA_3-chr1	1324027	1323539	-	CDS	Single-stranded DNA-binding protein in PFGI-1-like cluster	atggctacccccgtcttctgggaaggcaacatcggctcggcgccggagcaccgcagcttccccaacggcaacaatcctccgcggcagttgctgcgactgaacgtgatgttcgacaactcgattcccgatgggcaaggcggctacaaggatcgcggcggcttctggtgcagcgtcgaatggtggcatcaggatgcccagcgcttcgccgaactgttcacgaaaggtatgcgcgtcaaggtcgaaggcagggcgatcatggaccgctggccggacaaagagtcaggcgaagaagtccaggcgctgaaggtcgaagcctcgcgcatttccatccttccgcatcgcctggccgaggtcaccctgttgccgtctaccaacggccagtcgacacaacatcagcag…	MATPVFWEGNIGSAPEHRSFPNGNNPPRQLLRLNVMFDNSIPDGQGGYKDRGGFWCSVEWWHQDAQRFAELFTKGMRVKVEGRAIMDRWPDKESGEEVQALKVEASRISILPHRLAEVTLLPSTNGQSTQHQQSRQVPQQPAQQDAQSQQDYDSAFDDDIPM
KB-PA_3-chr1	1324887	1324057	-	CDS	hypothetical protein	atgagcaacatcagcagcaagaccgtttccaacaccaaagcccagccctccaccgaggtcagcgtcgagatcatcggcggcaagcccaccacgaccagcctcgacgtcgccaagcattttcggaagaggcacgacaacgtgttacgggatatcaaaaacttggaatgtcccgaggattttgcactcctcaattttgaggagtgttcccgcacgggagcgaacaacaggccagagccatacgtgcgcatgactcgcgacggcttcacccttctctgcatggggttcactggcaaggaagctatgcactggaaggtcgcttacatcaacgccttcaacaagatggaacaggcgatcatcgagcaacccgagatcctcagccacaaccacctgctccagttc…	MSNISSKTVSNTKAQPSTEVSVEIIGGKPTTTSLDVAKHFRKRHDNVLRDIKNLECPEDFALLNFEECSRTGANNRPEPYVRMTRDGFTLLCMGFTGKEAMHWKVAYINAFNKMEQAIIEQPEILSHNHLLQFAIKTLDLMRDHTLGEPARPRTEQVVCNYLAVESLDAATPEQIKQALNFLQGQIIGEGVAAKSLPSVAGSSIAKDLLYGLLRSAHDAELLFNSLYDSGVEKLASEVFKEHMANTLAATSRQTRELLGYVASRATRSPFKPRSTH
KB-PA_3-chr1	1325483	1324935	-	CDS	Integrase regulator R	atgcggcagctcgataaggaccagcaaggcgctctgcaacaaagtgccttccgcccactgcaacaaactgccttccaggcgctgcaacacagtgcctcactaaaaggccttttaaagccttttaaaggtaagggggagctggcccagttagcggagcagtgcgaagtcctggagcagggattgcttgaactcgcccagggactgctggcccaggttcgtcgcccgcccttcactcttctgcccgcccgactcatcgagcagcgcacatccgcccgcaccacctttcttcgctggcagcacattgcaacccggcggatgggcgtcggggtgtgggcggaaatgctgcgccaggacaagaccccggaatacctgctgcaagacctctacgagatggagctg…	MRQLDKDQQGALQQSAFRPLQQTAFQALQHSASLKGLLKPFKGKGELAQLAEQCEVLEQGLLELAQGLLAQVRRPPFTLLPARLIEQRTSARTTFLRWQHIATRRMGVGVWAEMLRQDKTPEYLLQDLYEMELQRITLNMQISLIHSIGKQAAECAEKMGQAEAEFMGRLQQSQTRPGSVGM
KB-PA_3-chr1	1326217	1325489	-	CDS	FIG141694: hypothetical protein in PFGI-1-like cluster	atggctgaaacccatcggcttcagatcggctctctccgcagcgatgtcgccctgacgcttcacacctatcacgccgcccgcatctggacaggccggcagaagtcggatgccaagcacagcatcctcggcctctccggcttctgcgcctacgtgaatcgcatgcaccgcggggcagcacaggacgatccgtactccgactggtggctggttcagatcgaagagaaagtcgagagctgccaagccgcgctcaaggccatcgaccagcgactggatgacgtcatggccaagctgcccgcgaccctcgatatctccgagaacctgtcagtcacaccggtcaaggtcccattgttcatctccaaccctctcggcttcaaggcggtctatctcctgaccaactac…	MAETHRLQIGSLRSDVALTLHTYHAARIWTGRQKSDAKHSILGLSGFCAYVNRMHRGAAQDDPYSDWWLVQIEEKVESCQAALKAIDQRLDDVMAKLPATLDISENLSVTPVKVPLFISNPLGFKAVYLLTNYDELARRILLAQHVGLVGRRDMEVWLDEGASVLRSLFGLAQSYQFSGATRDDFAANNARAEVARKMYEKFGEIPQDILEGTRRSNFAPPITRGRSDGDADDDADRVELED
KB-PA_3-chr1	1326571	1326374	-	CDS	FIG00960543: hypothetical protein	atgtgcgactcaatcgtgtatgcccctatggacgaactcgaattcgagcggctgctagggctggcaaccctattcaacgacaacgatgaatggcctatcgactttacggagctgcaggaactgagcgagctgctcggcaagctcaaaagttgcgtcgacgtagcgatagacaacgcccccgagggggccaagagctga	MCDSIVYAPMDELEFERLLGLATLFNDNDEWPIDFTELQELSELLGKLKSCVDVAIDNAPEGAKS
KB-PA_3-chr1	1326763	1329138	+	CDS	hypothetical protein	gtggcaacacccagctcgccgccggcgctggggtcggtccctggtggggtgattccagtggaaccacccaactcgccgccggcgccgaagtcagttcctggtggagtggttccagtggaaccacccaactcgccgccggcgccgaagtcagttcctagtggagtggttccagtggaaccacccaactcgccaccggcgcggaggtcggttcctggtgaagtggtgccagtggcaccacccagctcgtcgacggcgccgaggcctggtcctggcggagtgttgccagtggcaacacccagctcgccgccggcgctggggtcggtccctggtggggtgattccagtggaaccacccaactcgccgccggcgccgaagtcagttcctggtggagtggttcca…	MATPSSPPALGSVPGGVIPVEPPNSPPAPKSVPGGVVPVEPPNSPPAPKSVPSGVVPVEPPNSPPARRSVPGEVVPVAPPSSSTAPRPGPGGVLPVATPSSPPALGSVPGGVIPVEPPNSPPAPKSVPGGVVPVEPPNSPPAPKSVPSGVVPVEPPNSPPARRSVPGEVVPVAPPSSSTAPRPGPGGVLPVATPSSPPALGSVPGGVIPVEPPNSPPAPKSVPGGVVPVEPPNSPPAPKSVPGEVVPVEPPNSPPARRSVPGEVVPVAPPSSSTAPRPGPGGVLPVATPSSPPALGSVPGGVIPVEPPNSPPAPKSVPGGVVPVEPPNSPPAPKSVPSGVVPVEPPNSPPARRSVPGEVVPVAPPSSSTAPRPGPGGVLPVATPSSPPALGSVPGGVIP…
Additonal Region 5
KB-PA_3-chr1	1349191	1346171	-	CDS	Large exoproteins involved in heme utilization or adhesion	atgaatagaagctacgccctggtctggaaccaggccacaggatgctggaatgtcgccagcgaaggcacccgccgccgcggcaagagcggccgcggcacgctgctggcggtcgccggcgcatcgttgctgaaccttctcggcctgcccgaagccttcgccctgccctccgacggcaagatcgtcaatggccaaggcagcatccataccagcgtcgacggcaagcacatgaccatcgaccagcagagccagaagctgatcgcccactggaacggcttcgacatcgccgccgacgagcgcgtcagcttccagcaacagaacagcaatgccatcgccctcaaccgggtactcggcaacgacggcagcaagatcctgggcaagctcgacgccaacggcaaggtg…	MNRSYALVWNQATGCWNVASEGTRRRGKSGRGTLLAVAGASLLNLLGLPEAFALPSDGKIVNGQGSIHTSVDGKHMTIDQQSQKLIAHWNGFDIAADERVSFQQQNSNAIALNRVLGNDGSKILGKLDANGKVFLINPNGVMFGKTAQVNVGGLVASTLDISDKDFLDGNYRFSGKSGAGVSNAGTLSASEGGSIALLGARVDNSGVVQARLGSVALGAGQDVSLNFDGDGLLNLQVNAGAVDALAHNGGLLKADGGQVLMTARSADSLLKTVVSNQGVIEAKTLQNKSGRIVLDAGDGGAVLVAGRQDASALGGQGDGGVVENRGGKVEVQLAAQVDTQADQGRTGTWKIRSNEVDVAQTATRKTPTLLADTLSRNLGSTHIELTSKRGNLKVDAPVS…
KB-PA_3-chr1	1350995	1349250	-	CDS	Hemolysin activation/secretion protein	atgccgccctgtctcgatgactttccgttgaaccatcaccctctgccatccagcgactccctgaacaatgcccgaccaagacgcagtgccggtgtcgccggcgtggcgctgctgctctcctccctgggcatcgccgcggcccccatctcgataccggacgccggccaggccgtacgcgatgcgcagagccagcgcctcgacctgcccgcgcccgtggagctggatccggaaaaacccgcgccgcaagacgcaggcgctaccgacgcctctgccgaggggccgcgagtacgggtcgacaagttccaggtaggcggcaaccgggtgttcgattccgcgcggctgctcgccctgctggccgatctcgaggggcatgagctgagcctgccgcaactgcatgcc…	MPPCLDDFPLNHHPLPSSDSLNNARPRRSAGVAGVALLLSSLGIAAAPISIPDAGQAVRDAQSQRLDLPAPVELDPEKPAPQDAGATDASAEGPRVRVDKFQVGGNRVFDSARLLALLADLEGHELSLPQLHAAAGRIGDFYQQHGYVLARVYLPAQEIENGTVRLEVVEGRYGQVELHNGSRTLDPVVRQPLANLESGTPVKGDELERSLLLLSDIPGVEAKGTLLPGQVPGTTDLRIDARTAPLFSGRLEADNFGDRAMGEYRLGGVFDVNGPLGLGDQLNLRLLGSDRHQRYYRAAYQLPLGPWGSRIGMAHSETSYRLVRDFKEWEAHGRAIIDSLFLTHPLLRSRAFNLSTQLQYEEKRLNDDIDLFEFKKSKQIHLWTAGFSGSSQDRLLGGG…
Additonal Region 6
KB-PA_3-chr1	1430291	1430451	+	repeat	repeat region	acctgcttcattccttcacaattcctttcacagtgtgaaacggcccctgggctctccaggcccagcaggggcgcgtcctgggagcctggtttcatctcaccccgggtttcacgatttccacgacacacggcccgtcggcgggagggggataagtgcgtttt
KB-PA_3-chr1	1430583	1430765	+	CDS	Uncharacterized protein Npun_F4007	atgcggagtagggaagtgattgatttgctgttggaggatggctggtatgaagtggcggtgaaaggtagccaccaccagttcaaacatccttcaaagcctggaaaggtgacggttcaacatccgtcctcgacgataccgaaaggaaccctgaacaacatactgaaacaagccggcctcaagtga	MRSREVIDLLLEDGWYEVAVKGSHHQFKHPSKPGKVTVQHPSSTIPKGTLNNILKQAGLK
KB-PA_3-chr1	1430793	1431197	+	CDS	Antitoxin 1	atgaaattccccgtggtgttacacaaagaccctgattctgactatggcgtgactgtgcccgatgtgccgggttgcttctctgccggcgctacggtgtccgaggccctggccaatgtagaagaggcgctggccttgcacttcgaaggcttggttacggacggcgaagagctaccccagccgcaggacgttgacgcccatatgaagaatccggacttcgaaggtggcgtatgggcggtggttgacttcgacgtgaccccgtacctgggcaaggccgtacgctttaatgcgacgctcccggaacaccttctgcagcggatcgatgagcgcgtgaaggtggataagcgctatcagtctcggtcgggctttctggcaacagcggcgatgcgcgaactgtcagtg…	MKFPVVLHKDPDSDYGVTVPDVPGCFSAGATVSEALANVEEALALHFEGLVTDGEELPQPQDVDAHMKNPDFEGGVWAVVDFDVTPYLGKAVRFNATLPEHLLQRIDERVKVDKRYQSRSGFLATAAMRELSVA
KB-PA_3-chr1	1431216	1452205	+	repeat	repeat region	agcccgccatctggcgggcttttgctatgcggtgatcggcttcagtttcgcggccaggttggccgcctgggccgcgtcggcggtgaagtcgccggcgttcgtcggtggtcctactggcgggtggacgtgcccggccagctggttgttcatctgctccaccaggtcgagcaggtcgcacagcacttgcaggacgttcacgcccgcggatccaacccaggtcgtcggcgcctgcaggcgctgggcgacggccgccacgctccggcgcattccctggatacgttcgtccatgtcggcgccgatggtggcgttgtagcgctggctggcaaccaggttcaggtcgcgcccggtggcctggtgtagatcgtccacggcggccaggctggcggatccgccggataa…
KB-PA_3-chr1	1432211	1431240	-	CDS	Phage protein	atggaagaagccgtaacccgcatcgtagagcgtcaattccccgaactctccggcggctaccacctgccgcgcttcgcccgcgtcatcgccgtggcggatccaccggcagcgaacgggatctgcgacgagttccgcccgcgctatgccgtggacctggagatcctggacgtgaacggcgaggccgacccggcattgccgcccatgccaggcgtcccgctaccgctgccgaacggcggcggcgaacgcgggttcctggcgttccccgaggaaggcagcatggtggtggtgggtttcgcctacggcctgccgaacaagccgttcattttgcagatactgccccacggccagagcctgccgaagctgccgaaagaggatcagctgtggcagcacagcgaagcc…	MEEAVTRIVERQFPELSGGYHLPRFARVIAVADPPAANGICDEFRPRYAVDLEILDVNGEADPALPPMPGVPLPLPNGGGERGFLAFPEEGSMVVVGFAYGLPNKPFILQILPHGQSLPKLPKEDQLWQHSEAVLQRVDGAGNWTRQTDGRIRDQAMEREVEALENVERYQGSRVEIEDHATEQVGGVKRIEALGALKLLSGGSASLAAVDDLHQATGRDLNLVASQRYNATIGADMDERIQGMRRSVAAVAQRLQAPTTWVGSAGVNVLQVLCDLLDLVEQMNNQLAGHVHPPVGPPTNAGDFTADAAQAANLAAKLKPITA
KB-PA_3-chr1	1432894	1432196	-	CDS	FIG00961033: hypothetical protein	atgaaacttcaccaggtactcaccatcaacggccaggccgtgccgctggtccagagcgaagtccgcctggatctgcgcacgcccgggcgggcgtcgttcaccatcaaggcgccggcggcggagccggtacgcggcctggtcgccctagacattggctacaacgaccggccgctgcagcggcacttcctgggctacgtcgagcgctgcagcgcggcgaacgcgacggaacaggtcctgttctgccgcgagctggccgccgtcctcgcccagcccctgccgatggggctacgccacgtcgatatgcgcgaggtcctcgaggacgtgagccgccagaccgggctgtcgttccgcgtccccgacgccgactactccaggacgaaggccccttacttctactcg…	MKLHQVLTINGQAVPLVQSEVRLDLRTPGRASFTIKAPAAEPVRGLVALDIGYNDRPLQRHFLGYVERCSAANATEQVLFCRELAAVLAQPLPMGLRHVDMREVLEDVSRQTGLSFRVPDADYSRTKAPYFYSLAAGYQAMDSLARVFGIPDFVWHQQGNGEVYAGSWADSYWGARAPIELEAELFDSYQGRQSAVIAALPGIRPGATINQGERITSVTLTGTQMAIKWKKP
KB-PA_3-chr1	1433433	1432894	-	CDS	hypothetical protein	atgacgctgctcctcgatggccagcaggtccatggaaagggcctgcaggtgacggccaatctgcggatcgaaagcgctgacctgtccgggcagaccagcaacacggccaaggcgcacaagggcttcaagcccaaggggctgaccgtcagcctgatgattccctacgtggaccaggtgcacctggtcgagctggtgcggatggccgaggcgaccgccggcggcggccagttgcacacctatcgggtggtgaaccagacagcggccgcgttcggcgtgcgccaggttcagttcagcgacaacctcagtgtccgggaagatgacattctgcgggcctggcggatccagttcaccctgaccgaacagctgtccaaccccgagcgcgtggagacgcgccggccc…	MTLLLDGQQVHGKGLQVTANLRIESADLSGQTSNTAKAHKGFKPKGLTVSLMIPYVDQVHLVELVRMAEATAGGGQLHTYRVVNQTAAAFGVRQVQFSDNLSVREDDILRAWRIQFTLTEQLSNPERVETRRPGKPVQQQVGAGAPVADPAAGGDGKSGQELTGFEKILQRVDDAIGGA
KB-PA_3-chr1	1434350	1433430	-	CDS	hypothetical protein	atgacatgggcacccgtcaccatgcgctggcccgcacagacgacccgctggctggacgacctgggcgcggcccagcagctcgccagcggcgagctggcgggcaccgccgagcgcctgcgcgggctccaggacctggccaccaccaacccggggccggtcgccggcgccgccaaggcggccatcacagccgggcgcagcgccatggccagcacactgggcgaggtaccggcgtgcctcgcggtaacgccgttcctcgccggcgtcggccaaggccagggcaaccagcgattcctgtccgcgccgaacctgctgcagcaactggccgacaagctgctgcagccgcagcgcgacgaccaggaacagtacgccctggtcctgctgttcctcggcacccgctac…	MTWAPVTMRWPAQTTRWLDDLGAAQQLASGELAGTAERLRGLQDLATTNPGPVAGAAKAAITAGRSAMASTLGEVPACLAVTPFLAGVGQGQGNQRFLSAPNLLQQLADKLLQPQRDDQEQYALVLLFLGTRYDQLAATLARFNALLPVPDLQRAERRAASLARLELEKWIMPRTTPGPRWQDLPLDRCTITRAAQQSLSGQLAVLEGYTADSSPMAELGALAQRKQALQASKDNALQALREQLANGVADGTMQARLVGPGNAVELRRQLLQGEAPGHEWVLCAGLALVGSLSGLAFVRELVGLDP
KB-PA_3-chr1	1435057	1434347	-	CDS	hypothetical protein	atgaccaccctgaccgtttaccaaaccaacgccctgggcctgtacgtcggccccaccgacgccgatgaatcgcctctggagcccggcgtgttcctgattcccgccggttgcgtgcaactggccccaccgaaggagccgaagggcaagcgcgcacgctggacgggatccgactgggagctggtggactggctcgacggcgtgaccacctacagcacccgcgacggctcgcccctggtgctgcagggcctggaaccgctccccgagggctacaccctgcagcagcccgggccgaaccaggtctggaaggacggcgcttgggtagacgatctgcccggcctgctcgccgccgcccacaagcggaagaccctggagatccgcgccgccggccaggcgttcctg…	MTTLTVYQTNALGLYVGPTDADESPLEPGVFLIPAGCVQLAPPKEPKGKRARWTGSDWELVDWLDGVTTYSTRDGSPLVLQGLEPLPEGYTLQQPGPNQVWKDGAWVDDLPGLLAAAHKRKTLEIRAAGQAFLDGGFYSSALGNPHFYASSLSDQMNVTSLAALGISADYPCAAGGEQNREWRRHTANQLRQVGVDLVQHRQAGQQQVERLQDELDAALAAQDLERLEAITWSIPA
KB-PA_3-chr1	1437035	1435071	-	CDS	Phage tail fiber protein GpH	atggcacgcattaccgccgccggcgaacgcttgattgcccagaagctgggcgaaaagaagattctggaggtcagccgcttcgtgctcgccctggtccccgggctggatcccaccagccctgtggatcgcgacgcggccctgccgccggcgcagcagatcgtccacactgcgcccgtcacccaggccggctacgtcaaccccaaccaggtggtttacagcctcatgatgggttcggacgtgggcgacttcgactggaactggatcggcctggagacggcggaaaaggtcctgctggcggtcgcatacgtgcctgtccagcagaagcgcaagaaccgcccgccgctgcagatcggcaacaacgtgacgcgcaacttcctggtggcgttcgacggtgcccag…	MARITAAGERLIAQKLGEKKILEVSRFVLALVPGLDPTSPVDRDAALPPAQQIVHTAPVTQAGYVNPNQVVYSLMMGSDVGDFDWNWIGLETAEKVLLAVAYVPVQQKRKNRPPLQIGNNVTRNFLVAFDGAQELTGITIDASTWQHDFTVRLAGIDERERLANRDMFGRGTFFSTGLLLEKASTNYRLKAGLAYVEGIRVHAPEDVSIAAPSLPNTAWLDVRLQRSQSDVVASWSIAWGTNQTDYTDSAGVRHYLVPLADLDAGGNLVADRRLPKPITGPLVDHWAAQVGDYPKLRARATTKTDVGLDKIPNAISDDPALDRGDVLATTKATRAVQLRAAQDLDDLAKSLGTAARRDVGTDAGDLLEVGAFGWGTNDSPVAASVNIYESSVTKFTPAT…
KB-PA_3-chr1	1437571	1437047	-	CDS	Phage tail formation protein GpI	atgattaagctgcacttgcccttctggctggacggccccgagctggccaagctgcgccgcgccgcgcaggcttggtgggagcgggccgagggctggctgcgctggccgctgctgcagctcgacgcggaaacctgccacctcacgatcctggatctgctcgcctggcagcgggatatcagccggtttcgcggcgagccggaacccctctaccggctgcgcgtgaagcacgcattcgtcaacgccgtggatgccggctccgtcgctggcgtgaagcggatcctgcagcgcctcggcgtcggctatgtcgagatcgaggagcgcatgcccggtcgggactgggacgtcgtgctgctgacgctgaccgactcgcagttgtccgcgaatcccgagctgttgcgc…	MIKLHLPFWLDGPELAKLRRAAQAWWERAEGWLRWPLLQLDAETCHLTILDLLAWQRDISRFRGEPEPLYRLRVKHAFVNAVDAGSVAGVKRILQRLGVGYVEIEERMPGRDWDVVLLTLTDSQLSANPELLRVLVQQYGRTCRRYDFQTITPVTLHVVAVDFNDDQQTLVATL
KB-PA_3-chr1	1438736	1437564	-	CDS	Phage protein	gtgactgtagatttcaaggccgcactgcgcgatgccggcatccccaccaccgaagccgagctgcgcaaggcgtgggaaaaggaagtcgaggcccagggctcgctgttgtccaacaccagcgcctattcgccgttctggcgcatcgtcaccgcgctggtgacgaagccggtcctggccctgctggagttcgtcgccggcaccgtgctgccgaacttctttgttcagactgccggcggcgcctggctcgacatgctggcctgggcagtggacgtcgagcgcaagccggcgacccgcgccctgggctcgctgctgttcacccgcgccgcgccggccagcacgctggaagtgcccgccggcacgcgggtgcaatccgccgcgatcaacggccacgtctacgag…	MTVDFKAALRDAGIPTTEAELRKAWEKEVEAQGSLLSNTSAYSPFWRIVTALVTKPVLALLEFVAGTVLPNFFVQTAGGAWLDMLAWAVDVERKPATRALGSLLFTRAAPASTLEVPAGTRVQSAAINGHVYELETTQPGLFNDGQTQVAIPVQAVEPGSGFNLAPGYYAILPVPVPGIVQVVNPDGWLTQPGADSEPDSQLRLRVRNQFSAVNQYHTDAVYRAMISGFQGVRPDGVYFEHGAPRGPGSANAFVLFDAGVPADEYLQQINAYIRDQGNHGHGDDLQVFVMPETLHQVRVEIWPRANLSIEQRAELKTQVEQFIRAAFRESTASDYQPTLTYPQSRFSFSRLAEELHEQFPRLESLHFDNTDILSQLNIPRLQSLQVVAHD
KB-PA_3-chr1	1439053	1438733	-	CDS	Phage protein	atgactgccctttatatcgatctcctgatcgtcggcaacgacctggacctggacccgtcccaccagccgcggcttgtcgacgaccgggccagcatcgctcaggacatcgcccacctgatccgcgaaagcggcctgctggtcacgctggtcgccgagcgcagccggctaaggcagcgtgactgtatccagcagctggaactgctggtggagtccgacgaacgcctggtgccgggcacagtacggattatcgaagaggggccgggccgctacctggtcacggccaccactgttgaattcggcgcaatcgaggtaacgctgtga	MTALYIDLLIVGNDLDLDPSHQPRLVDDRASIAQDIAHLIRESGLLVTLVAERSRLRQRDCIQQLELLVESDERLVPGTVRIIEEGPGRYLVTATTVEFGAIEVTL
KB-PA_3-chr1	1441104	1439050	-	CDS	hypothetical protein	atgagcaccaagagcaccgcgaaactcgactttgtgctacgcctgatcgaccaggtgacggccccggccgcgaaggtcagcaagagcctgatggacgtggccgaggtcggcaaacgggggttcatgcaggtgggcgccggcatcgccggcgtggtcggctcgctgatggcattccggcaatcgctcgccccggcgcttgagcagaccggcgccctgggcgagatccagtccctgggcgtcgcccaggacgccctggacgagctgaaccaggcgtcgatggagttcgccgcgaactacggcgaacacgcctcggcgttcgtgcgctcggcctaccaggtagaaggcgcgatcaagggcctggtgggcagcgagttggccagcatcaccagcgcgtccaac…	MSTKSTAKLDFVLRLIDQVTAPAAKVSKSLMDVAEVGKRGFMQVGAGIAGVVGSLMAFRQSLAPALEQTGALGEIQSLGVAQDALDELNQASMEFAANYGEHASAFVRSAYQVEGAIKGLVGSELASITSASNVLAKATKADADTMTTYIGTMYGLFQGQADAMGRAKWVEQLTGQTARAVQLFRTSGAQMNDAFKAVGIGASAAGADLVEQMAVLGTLSQTMEGGEAGGLYKAFFENVSAAQDKLGMKFTDAGGRLLPIMQILDKLQVKFGQLTKQSDLDAITGAFGGEAARMIVTLLKDTGALANNLDQLGKVKGMERAEQMARAMVDPWQQLDSVIENIRISFGMVLLPVLNPLIEGLRDAGNTFQRWLVMFPNIARWLGYITLGVLGLVAAAGML…
KB-PA_3-chr1	1441259	1441119	-	CDS	hypothetical protein	atggccctggccgagcgctggctacctggcgccgcgcccacggcagacaacctgggcacggccaaatggctggaggacgagcactggcggcggatggaaatcgccgtggcaaacggcatcgccaaggccctgaaaggctga	MALAERWLPGAAPTADNLGTAKWLEDEHWRRMEIAVANGIAKALKG
KB-PA_3-chr1	1441570	1441283	-	CDS	FIG00958915: hypothetical protein	atgaccgaacgcaccgaaatcaccctggagatccaggacaccgaattcctgttcaccctgaccccggcggacgtgacccgctatttcaacgccgtgacccagaacaacaaggtcgcgccgtcgaacaacctcctgcgcagcaccgtcaagcaggagcaactggcgtccctgcgcccgcacctggccaaccccatgacggtcatgaagctcgccggcgcgctcctcgaggagtacgcccccgacgttgaagtcaccgtaaaaaagcgctcgaccgagccgagcgactga	MTERTEITLEIQDTEFLFTLTPADVTRYFNAVTQNNKVAPSNNLLRSTVKQEQLASLRPHLANPMTVMKLAGALLEEYAPDVEVTVKKRSTEPSD
KB-PA_3-chr1	1442052	1441567	-	CDS	Endopeptidase (EC 3.4.-.-)	atgagccgcgtcctactcgccctggtcgcctgccttgtcgcgctgctgatcgagcgcggctgtctgcagcgcaccaacgaccgggcatcccgcgacctgcaggacgcccgccgcgaggtcgccgggctgcagcaggccgcgcaggtcgccggcgagctgctggccgcccgcgatgccctcgacctcaagcacacccaggaactgaacgatgaacgcaacgcgaacgagcgcctgcgcgctgctgttgacgctggccgtcagcggctgcacgtcaaggccacctgccccgcccctgtgcccaccgatgccggcgccgccggcctggctgctgcaggagccgccgaactcgatagaacggctcgacaggattattacgccctccgcgacgatctcgccctg…	MSRVLLALVACLVALLIERGCLQRTNDRASRDLQDARREVAGLQQAAQVAGELLAARDALDLKHTQELNDERNANERLRAAVDAGRQRLHVKATCPAPVPTDAGAAGLAAAGAAELDRTARQDYYALRDDLALTRRMVLALQDYARSCSRSFSTQPQGSTQ
KB-PA_3-chr1	1442510	1442049	-	CDS	Phage lysozyme R (EC 3.2.1.17)	atgaagctgccgcccaagctggccgccggcggcggcgtgctggcactggccgccgccctggttgcgccgttcgaggggcgttcgttggtggcctacctggacccagtgggaatcccgacgatctgcgagggcatcaccgccggcgtgcgcatgggcgacagggcgaccccggccgagtgcgatgcactgcttgaacgcgagctgcagcgcgccgtcgatgccgtggaccgccaggtcctggtgccgctgcccgacacccgccgcgccgccctgggctcgttcgtctacaacgtcggcgaaggccagttggcccgctcgacgctgctgcgcaagctcaacgccggcgacgtgcgcggcgcctgcgccgagctgtcgcgctgggtctacgccggcgggaag…	MKLPPKLAAGGGVLALAAALVAPFEGRSLVAYLDPVGIPTICEGITAGVRMGDRATPAECDALLERELQRAVDAVDRQVLVPLPDTRRAALGSFVYNVGEGQLARSTLLRKLNAGDVRGACAELSRWVYAGGKKLGGLVRRRAAERELCEIGL
KB-PA_3-chr1	1442812	1442507	-	CDS	hypothetical protein	atgggcaaccgcactacgcctgccggccgcctcggcaaactggagcgtgacatggccgtcatcgatcaccgcctgaccgacgtcgagcgcctgaaccgcgacgtaccgccccggctgacccgcctggaacaacagttcgagcacgtcaccgaccagctcgacgaactgaaccagggccagcagaaactggccgtcaccgtagacggcctgggccggaagatcgcctgggcactgggcgtcgccagcgcgctgtgggccgttatccagatggtcgcaccacacctactgcgcggggtgatgccatga	MGNRTTPAGRLGKLERDMAVIDHRLTDVERLNRDVPPRLTRLEQQFEHVTDQLDELNQGQQKLAVTVDGLGRKIAWALGVASALWAVIQMVAPHLLRGVMP
KB-PA_3-chr1	1443021	1442812	-	CDS	Hypothetical Zinc-finger containing protein	atggccgactgtttcgaccgcgcccaggcccgcgagctgcaggaccgcgaactggccctgcaggcgcaccaggtgcgcgtccggcccagcgggccgagcctgacccactgccaggaatgtggcgagcagatccccgaggcgcgccgcgccctgggcgggatcatccgctgcacgccgtgccaggcccgtttcgagaaagggggccgctga	MADCFDRAQARELQDRELALQAHQVRVRPSGPSLTHCQECGEQIPEARRALGGIIRCTPCQARFEKGGR
KB-PA_3-chr1	1443470	1443021	-	CDS	Phage protein	atggctcgcatttccggaatgaacttcgatatcaccctgggggacctgcaggtccacgtcgagaaagcgaccctggatatcaccgacaacagcgcggtagtccagacccgtggcgtgccggatggattcgtagacggcgacgtgaccgccagcggcgaatacgagttggacgccgcgaacttcgccctgctgatcgaggcggccaagcgcgccggcagtttccgcaagctggagccggtcgattccctcttttacgccaaggcgggcgacagcgaagtccgcgtagaggccttcggctgcaagctgaaggtttccagcctgctggatatcgaccccaagggcggcagcaagaccacccacaaggtgcccttcgacgtcaccagccccgacttcatccgc…	MARISGMNFDITLGDLQVHVEKATLDITDNSAVVQTRGVPDGFVDGDVTASGEYELDAANFALLIEAAKRAGSFRKLEPVDSLFYAKAGDSEVRVEAFGCKLKVSSLLDIDPKGGSKTTHKVPFDVTSPDFIRINGVPYLDASETEDLR
KB-PA_3-chr1	1444588	1443473	-	CDS	Phage protein	atggctctaggcagcgtcagcgtcaataacctcaacctcggccaaggcccggtgacagctatagaacgctatttccttttcatcggcccggcgtcgaagaacgtcggcaaattcctggccctcaacacccagtccgacctggacgttcagttggggatcccggacgcggacctgaaacgccagatcgcggccgcacgcgccaacggtggcccgcgctgggcgtgcatggcggcgcccatcggcgccgacggccgctggcaggacgccctggccgccgcgcaacagcagggcgtgtcggtcgaggcggtggtcatcacccgtccggtggccaccgccgccgagctgcaggagatgcacgccgccgctgtggagctgagcaaccgctacggccgccgcgtg…	MALGSVSVNNLNLGQGPVTAIERYFLFIGPASKNVGKFLALNTQSDLDVQLGIPDADLKRQIAAARANGGPRWACMAAPIGADGRWQDALAAAQQQGVSVEAVVITRPVATAAELQEMHAAAVELSNRYGRRVFVMAAVAGLVEGQDWATYLSQARALVADLAAPRVLCVPQLHGNNLGVLAGRLATDEASIADSPMRVPTGAVLALGETPKDKDGVPLDMATLAELDKARYSVPQTYPDYPGVFWGDGNMLDAPGSDFNVVENLRVADKAARRVRILLIQRVADRRVNNTPASMAATASALMRPLREMSRSTTFAGLVFPGEIQPPLDGDVVLTWKSRTEIEAFIRVRPYNCPKTLTANIALDLSGGDED
KB-PA_3-chr1	1445265	1444600	-	CDS	FIG00956269: hypothetical protein	atggctgagccgctgaatctcgacctgcgcggcctgctcggcgtgcgtgcccagctggcgctggcgacgctgccgccgcagctgcgccggcgtctgctgaacaacgcgctaaagcgcgtacgcgcccaggcccgccgcaacgtctccggccagcagagcccggacggtacgccctttgaaccgcgaaagcgcaagggccgccgcaagatgcttgcgggcctggtcaagcccaagcacctgaacgtcacccaactgaacgccgaccagggcgtcctgggctggcggaacggcctgatgggccatatcgccgggcagcaccaggacggctacaccgagcgccgcaccgccgcgcagatgcgccgctggaaccgcgtccagccgaaccaagcatgcactgag…	MAEPLNLDLRGLLGVRAQLALATLPPQLRRRLLNNALKRVRAQARRNVSGQQSPDGTPFEPRKRKGRRKMLAGLVKPKHLNVTQLNADQGVLGWRNGLMGHIAGQHQDGYTERRTAAQMRRWNRVQPNQACTEKQAKRLRRLGFRVRQAGKRGLSRPSVPWIQEHVGFLQAGLLIRVLRDEQPGPQSWEITLPKRTFLGITQDETGRLVAQLLEQILNSPR
KB-PA_3-chr1	1445695	1445258	-	CDS	FIG00955159: hypothetical protein	atgaacaagctgcgcgccctgaccgcgtacctgatcgaacgccgtctggtccccgccgagcagctggattcgttcgccgagcaggtgaacctggctctggtctggaagcccgaggaacgcggcctgcgcctgggcgacatgcgctatcgcgccgtcatcatcctggaacggctggcagaccaccccgcacgcctgatggcgctggtcggcagttggcttgagaacaacgaccccgaccgcgacggcctgccggatccggtgttcgacgtcgagcagatggaccgcgacctggccgacgtcgagctggccgtggagttcgtcgagccggtccacctggcagaggattccgccggcgagatcgaggcgttcggccggcgctgggcgttcgtgccgttcgat…	MNKLRALTAYLIERRLVPAEQLDSFAEQVNLALVWKPEERGLRLGDMRYRAVIILERLADHPARLMALVGSWLENNDPDRDGLPDPVFDVEQMDRDLADVELAVEFVEPVHLAEDSAGEIEAFGRRWAFVPFDLWIAEHGEVRHG
KB-PA_3-chr1	1446158	1445697	-	CDS	Probable head completion/stabilization protein	atgagcttttccggcaaacccacccacgtgatcgagcagcccatccccaacgacggcttctggccggacctggacgtcgccgagttccagcgcctgtaccggatgccggcggaatacctgctggatctgctggtggacggcgtgaccaccgcccgggcagaggtgaaccaggacctggccaagcgcaagcgcgcctggcagaccgccggggtcactcggctggaaaccgcagatccgcaggtgctgccggatcgcgccgagtacgtggcgcactacaagcgcgccgtctactgccgtgccaagggccagctgttgagccagttcgccacgatgaaccgccgtcccgaggcagagaacctggcgaaagaggccgagcagacccgcgagctgttcctttcg…	MSFSGKPTHVIEQPIPNDGFWPDLDVAEFQRLYRMPAEYLLDLLVDGVTTARAEVNQDLAKRKRAWQTAGVTRLETADPQVLPDRAEYVAHYKRAVYCRAKGQLLSQFATMNRRPEAENLAKEAEQTRELFLSYSQQAVRLIQGRSRITAELI
KB-PA_3-chr1	1446999	1446256	-	CDS	Phage terminase, endonuclease subunit GpM	gtgagcctggccctggcccacaagcgccggattctggccgagggcgtggcggctgatgccgccaccgtcccggcctacaacccgagcgaggccctgaacagcccagcgaacgcgcagaagcacctggccctgatgctgaccgccctggatggcgacctggagcgcatcagcgcgatcaacagccgcgaggaacgccagcgcctgaagcgcgacgaactgctgcccaagtatctggactatgtgcagcgctaccgcgccgccggcctggtctacccgaatccggtcctggtccaggtgctggtctggctgttcgacacggttcagttcgaggacggcctggaactggccctgttcgctatcgagcagggccaggagatgccggagcgcttcaagcgccgc…	MSLALAHKRRILAEGVAADAATVPAYNPSEALNSPANAQKHLALMLTALDGDLERISAINSREERQRLKRDELLPKYLDYVQRYRAAGLVYPNPVLVQVLVWLFDTVQFEDGLELALFAIEQGQEMPERFKRRDIQTFVADAVIDWAEAEYKAGRTPEPYVSNLLPLVDGQWQLFERIPARYHKLLGQLAMDNEEWAQAIEHLDLAVALYPEIGVGTRRAAAAKALAKAEAEAAKQSDEGDEPPPTP
KB-PA_3-chr1	1448018	1446996	-	CDS	Phage major capsid protein GpN	atgggagccctcagcgaacgcgcccaggcgcagtaccagcaactccaagaggacatggccgaggcctataacgtccacgacaccgcccgcaccttcgcagtggagcccacccacgcccaggaactcaacgaccagatcaccgagcgcgccgacttcctcggtcgcatcaacgtcgtcccggtcagcgagatcaagggcgaaaaggttctgctgggcctgaacggacctgcgtcgagccgcaccgacaccagcaccaaggaccgcgagccccgcgacttgctggacctgaagaacaacgaatacgaactcttccacaccgaaacggacgtggccctgaagttcgccacaatcgacagctgggcgaagttcccggactttgccgaccgctacctggcggcg…	MGALSERAQAQYQQLQEDMAEAYNVHDTARTFAVEPTHAQELNDQITERADFLGRINVVPVSEIKGEKVLLGLNGPASSRTDTSTKDREPRDLLDLKNNEYELFHTETDVALKFATIDSWAKFPDFADRYLAAVQRRIALDRILIGFHGTHAAKQTDLQQFPMLQDVNKGWLQLARELIPEQVLKSADPAKKIVIGKGGDYANLDAAVHDVKQMIDPVFRDEGDLVAIIGSDLLAYDKGKLYAAQGQTPTEKERIEEAQVIATYGGLPSFLVPFFPVKGIMVTSWDNLSIYFQDTSWRRHLLENPKRSRVEDYNGRNEGYVIEQLGKFAALESDSVELAP
KB-PA_3-chr1	1448971	1448018	-	CDS	Phage capsid scaffolding protein	atgccccgttcccttgtttcaccgtggaagcgcgtggccgtcagcggcgacaccgtagacgggcgcgtcatcaccgagcaggaactgcgcgactgcgcggaaacctacgaccgcagtttctacacggcgacgatctgggccgaacatgatcgctggaggggcgcccacggcacggtctacgaagtgcgcctggtcgaagcaaaggacgacccggaacttgagcccggccaggtcagcttggaagcccgcctgcgcccgaacgacgacctgctggccctgaacgaccagggcaaaggcctgttctccagcatcgagatctggccgaacttccgcaattccggccgctgctacctctccgggatggccgtcaccgacgagccggcaagcacccgcacccag…	MPRSLVSPWKRVAVSGDTVDGRVITEQELRDCAETYDRSFYTATIWAEHDRWRGAHGTVYEVRLVEAKDDPELEPGQVSLEARLRPNDDLLALNDQGKGLFSSIEIWPNFRNSGRCYLSGMAVTDEPASTRTQELYFSRRRPNGAGVRFFTSSHPLSNLREDDGATAPEVRGLIASLTRVFKLFSVPNTPTENPSSDEVEPMDEATAKALKALYDQLVIILAGLQAVIEPVVEDVDTSDTQEQVDAVGAAVQDVVDQADEERDFKRKKGKEGKETKELSARMDELQDTMAKLLNTAQGRKIPRTTGAAAKARGKGLR
KB-PA_3-chr1	1449129	1451177	+	CDS	Phage terminase, ATPase subunit GpP	atgtcgtactcaatcgaagtgaaggaagccgccaaacggctgtatctccggcgggcgaagccgaaggagatacaggcccagctgggcctgcccaacgtccgcatcgtctattactggatcgcccggggcggctgggacgaactgctgacagatgaagaacccctggccgcgatcagcaggcggatcacgctgattgcggagaagcctggggcgttgtcgaaagcagaccttgacgaactggaccgactgacctcgatccgcgagcgcctgcagaagcaagcggtcaggcctgcgccgtcacctgcaggcgagcccgcaccggacgcccgcgccgagcgcggccgggagcgcggcgagcgcccgccacgagagggaaaacgcaagcccaaaaagttgaag…	MSYSIEVKEAAKRLYLRRAKPKEIQAQLGLPNVRIVYYWIARGGWDELLTDEEPLAAISRRITLIAEKPGALSKADLDELDRLTSIRERLQKQAVRPAPSPAGEPAPDARAERGRERGERPPREGKRKPKKLKNDVSGVTEIDFLDKFTSRMFGYQLELFAAKKNPLTARIRHILKSRQIGLTYYFAAEAFMDAVLTGDNQIFLSASRAQSEVFRSYIVAFAAQWFDIELSGNPIILSKDGKPWAELRFLSTNSNTAQSYHGHVYIDEVFWIPNFQKLQTVASAMASHAKWRLTYFSTPSAVTHQAYPYWTGEEFRNSKRGKKAGPWPSEAQIHAGALCPDGQWRKVITIQDAIAGGCNLFDLERLQLEYDEERFEQLFMCKFIDSTQAAFALADLERC…
KB-PA_3-chr1	1451236	1451943	+	CDS	Phage portal vertex protein GpQ	atggtgttcggggaatgcttcctgtacctgcgcgagaacatcgccggccaggtcctggagctggagcacctgccggcgatcaacatgcgttgccgattggacggcgggtacaccatgttactgccgcatggtgaggaactggagtttgaccaggacgaagtgctgcacctgaaagaatacgacgtggagcagaacatctacgggatacccgactacctgggcgggctccagtcgctgctgttgaacgaagcggcgacactgtttcgccggcgctactacagtaacggcgcccatgccggatatgtgttctatacgaacgacgagaacttgtcggaagaagatgaagagaatctgaaacagcagattgcggcaagtaagggtgtcggaaacttccgttct…	MVFGECFLYLRENIAGQVLELEHLPAINMRCRLDGGYTMLLPHGEELEFDQDEVLHLKEYDVEQNIYGIPDYLGGLQSLLLNEAATLFRRRYYSNGAHAGYVFYTNDENLSEEDEENLKQQIAASKGVGNFRSMFVNIPGGSEKAIQIIPVGDFQAKDELEKVKNITRNDVIAAWRMNPALAGIIPENSAGFGDIEKIDRVYMNNEIRPIQQLFLQVNEVLREDRRIAFKEASAG
KB-PA_3-chr1	1452434	1452225	-	CDS	hypothetical protein	atgggagacctcacaattactgagctgcgcgaccaacttaacgacgtacagcacgcgcttagtttcgtgagtggggcagttggttccgttccgctaacagagcctgagcgcctaggcgctcaagtgattatcaactgggtgaacagcgacctagcgggaacctccaaactgttggagaagattgggcgtcagggcaacaaccccagttga	MGDLTITELRDQLNDVQHALSFVSGAVGSVPLTEPERLGAQVIINWVNSDLAGTSKLLEKIGRQGNNPS
KB-PA_3-chr1	1452435	1452668	+	CDS	hypothetical protein	ttgccggtactccatgctggccaattgatgggagcaaactttatatgtctctattttgcttggtcaagcactttttcaggcttgattttattttttggatatggggcgatgaacggtttttgctggattctggagtgtcgatatgtttggcggtggtggcggtttcattatcgatatttcaatagaataattttctcattaaatgtttttctgaatggaggatttttacaatga	MPVLHAGQLMGANFICLYFAWSSTFSGLILFFGYGAMNGFCWILECRYVWRWWRFHYRYFNRIIFSLNVFLNGGFLQ
KB-PA_3-chr1	1453091	1452813	-	CDS	hypothetical protein	atgatcggcgcgccggttcacctgcaagaacgccgcgtgttcaatgtcagcgaagagcgtaatcggcaagcacgcaagcaactgtggctgccgtccaccttcgtgatcgtcgaagcctcgccggtgctcaactacttcagcggcctgggcgtcgtccagatcccgctgcctccgggggagttcctggtgggcatgcaggaccccgccggcgcccggcgcttcggaatggtcaggttcgaggggatccacgacctggagggatgggaggaacaggcataa	MIGAPVHLQERRVFNVSEERNRQARKQLWLPSTFVIVEASPVLNYFSGLGVVQIPLPPGEFLVGMQDPAGARRFGMVRFEGIHDLEGWEEQA
KB-PA_3-chr1	1453318	1453088	-	CDS	hypothetical protein	atgaaagctgaccgtcacggcaccctggccgagcagaagcggtttgccctgcgctggcaagacgtgaaccaacgcccggaatgcggcaactgtcgatacctgcgcaccgagaaagccccggccgcgacctgcccaggcgctgccgtccaggcgatccaccactgcgaccgaggcggattcctgacgaccaggaccgcgatctgcgaccagcacaagaggatcagccaatga	MKADRHGTLAEQKRFALRWQDVNQRPECGNCRYLRTEKAPAATCPGAAVQAIHHCDRGGFLTTRTAICDQHKRISQ
KB-PA_3-chr1	1453560	1453315	-	CDS	Alginate biosynthesis transcriptional activator	atgtctaactcccgtaccgccgagaagttcgtagtgcgcctacctgacggcatgcgcgaccgggtcgcggagactgcgcgggacaaccatcgcagcatgaattcggaaatcatcgcccgcttggaacagacactgctcgacgaccagtcccgccagcaccaggaccggctggtccagttgcttaacgcacggatcgatgccttggaagaggagctgcagctctaccgcaagggagcccacgcatga	MSNSRTAEKFVVRLPDGMRDRVAETARDNHRSMNSEIIARLEQTLLDDQSRQHQDRLVQLLNARIDALEEELQLYRKGAHA
KB-PA_3-chr1	1453819	1453553	-	CDS	hypothetical protein	atgaagaaacaccccagcggtagcactgcgaaggctaccacagcaccgcgccatctggttgccaccgccatcgtcggcggcgccctggttgcattcctggtcatgaaaacggacgcggcccgggccaggctgcagagcgtcgccgccctggcctacagcctgggcgaactcaccgaccaggacgtctcagtagtcgcccagttgctggcccgccccatacgtcctacagcccctgctatcacgttcggagaacaccaccatgtctaa	MKKHPSGSTAKATTAPRHLVATAIVGGALVAFLVMKTDAARARLQSVAALAYSLGELTDQDVSVVAQLLARPIRPTAPAITFGEHHHV
KB-PA_3-chr1	1454247	1453888	-	CDS	Phage protein	atgacgaagaacgaagaaaacctgggcaagctctttggagcccaactggtcaagtcgctgatcgatatacaggcgaccaaggtactgcggcgtctggtgccggaagcactctgtcacacggaaacagggggagtcgttgggcgccttctgctcggcctcgaggatggagaggcacaccccttcaacctgaacgacctgcggcgcctggatccgatcctgcaggacgaatgcctgttggtcatcgctctggacgggaccgccatgttgaaagtccgccagcgcatcgagcgcgacgataacggccgagtggtatgggccctgctgaacagcatgtgggcaccgaaacagccgaacgcctga	MTKNEENLGKLFGAQLVKSLIDIQATKVLRRLVPEALCHTETGGVVGRLLLGLEDGEAHPFNLNDLRRLDPILQDECLLVIALDGTAMLKVRQRIERDDNGRVVWALLNSMWAPKQPNA
KB-PA_3-chr1	1454624	1454277	-	CDS	Phage protein	atgaacgaatccatcagcgccgccatggccaagatctacgcctacgaccaggagcgtcccgccctgatcgccgccggcaaccaggcgctggtccgcctggcccccatcgcgctccagccaaccgaccaggcgcgcaccatcgggcgcttcctgctcgggctgtacaacggcgaggaattcccctttgacctgactgagctgcgcggcctggacctggatctgttccaggactgcctggcggtcctggtcatggattacagccccgagctggaggtccacgagcgagtcccaaacggcaatgccatctggcagcgcctgatcgagctgtgggccccggaagcggcttaa	MNESISAAMAKIYAYDQERPALIAAGNQALVRLAPIALQPTDQARTIGRFLLGLYNGEEFPFDLTELRGLDLDLFQDCLAVLVMDYSPELEVHERVPNGNAIWQRLIELWAPEAA
KB-PA_3-chr1	1455040	1454639	-	CDS	hypothetical protein	atggacgccacccaaccactcgcccagaacctggcccgcctggtcggcccgttcgacctggccagcagcaccgcgcaccaggactttctctactggtggcggcgcggcgccaagctgctgcgcctaccgcagctacagccccggcaggaccgtcactgggaagtccccgagatcgaggacgaccaactgccgcggatgctgaaagcgctgcacgccctggacgagccccaccaggcgctgctgctaacgatgctcagcctggccgggttcaagcgctcggcctggctgcatcaggaagccggcctggagttcggccagttggccgcctgcaggctcggcaacgacgtgttccagatcctggtcggcctgctggccaaccaccgcgaaacccccaaccac…	MDATQPLAQNLARLVGPFDLASSTAHQDFLYWWRRGAKLLRLPQLQPRQDRHWEVPEIEDDQLPRMLKALHALDEPHQALLLTMLSLAGFKRSAWLHQEAGLEFGQLAACRLGNDVFQILVGLLANHRETPNH
KB-PA_3-chr1	1455379	1455170	-	CDS	hypothetical protein	atgaaatataaatctctttattttcaatcacttaaacataaaaacacgttccaccactactggaacacacaggaacaatcggaacagttctgttccttacctgttccagcaatgttccaagagcatttttcatcggaacagccggtaagccacgtggcactagggttacagcgactttcacttttcacctgttctcaggtgttccagtag	MKYKSLYFQSLKHKNTFHHYWNTQEQSEQFCSLPVPAMFQEHFSSEQPVSHVALGLQRLSLFTCSQVFQ
KB-PA_3-chr1	1458168	1455478	-	CDS	hypothetical protein	atgaacgcacgtgtaagccaggaccagttcgacgagatctaccgtcaggacgttctgccggcgctggaaagcgacgccgaactggatttcaagccgcatgaggcttcggaaaagtacctgaacaacggggtatgcccgggctgtgggaagcgctcgctgtacatcagtcgccagaagccctttcagctgaaatgcaatcggctcaacaagtgccagtacgaagagaagacccgcgaccgttactcctacctgttcgaaaacctctccgatcgcttcccccgatcggaggccgacccgcacgccaccgctcgcgcctacctccagcgtgctcgcgggttcaacactgatcgacttgccggttgttacgagcaagcgcggtacaagaccaagagcggcgag…	MNARVSQDQFDEIYRQDVLPALESDAELDFKPHEASEKYLNNGVCPGCGKRSLYISRQKPFQLKCNRLNKCQYEEKTRDRYSYLFENLSDRFPRSEADPHATARAYLQRARGFNTDRLAGCYEQARYKTKSGEWVETVRFPLCDGYWERLIDQRGIQANEGKKAHIKYGTNYQNKGWTPPGQVIEKNDKVFIVEGIFHAIALWLAGYKVIASISANNFPWAYVDEHQGKLVTWTLALDNDKAGRTFTVKYRKQLAERNELVAVALLPLQGNGEPQDWDDVYRIGRLDETLVNDALYEGRLFTAPTPLNKAYVMFQRLNRSFFLLEFGNRLYSARVNKNELQTDGEAPGGGFLEEFKKHTTVEQVANCVPHFEYIQSDVITNEQQYFFRVAFPNGRNSVT…
KB-PA_3-chr1	1457513	1457617	+	repeat	repeat region	gggaagttgttggccgagatcgaggcgatcaccttatagccggcgagccacagcgcgatggcatggaagatcccttcgacgatgaacaccttgtcgttcttctcg
KB-PA_3-chr1	1458409	1458179	-	CDS	hypothetical protein	atgcagattgctatcgacacgccatacgtgactgtcgccgagttcgtgaagcgatccggccagtccaaaagcgctgtggaaaacgagatcagggcaggccattacctgatacggccaaagagggagggctcgcgtggggccgtgctgatcaacatggttcacatggccctggaagctgcagagcaggcgcagcgagtgcgcaacgaatcgaaagctggtcagcagcagtaa	MQIAIDTPYVTVAEFVKRSGQSKSAVENEIRAGHYLIRPKREGSRGAVLINMVHMALEAAEQAQRVRNESKAGQQQ
KB-PA_3-chr1	1458516	1458767	+	CDS	C protein	atggagttagcggagaagctgaaggcgattcggataagggagggaatgacccaagcggagctgtgtgaggcgacgggtatcagcctgagcagctacaagaaatatgagcttgccctacgccttgaggtgagttccgttgcgctgttgaagatcacgggccatacgcgattcaagaagtacgttctatggctgatgactggtgacaccgcgcccgattgcggtcagatcagtccgctggagcagcagaaatga	MELAEKLKAIRIREGMTQAELCEATGISLSSYKKYELALRLEVSSVALLKITGHTRFKKYVLWLMTGDTAPDCGQISPLEQQK
KB-PA_3-chr1	1458764	1459315	+	CDS	hypothetical protein	atgaagctgccagaaccgattcggccgctctatgtctggtgtggctactttgtcctggctttggggttgacggctgtaacgagtgatgctgagtgggtgaagtccgcgatggccatctacctagtgtgggccatcgtcgagaccattcgattcatccgccacaagaagaagggcaagagcagccaggcgctggctcagcagtggattgacgtggccgagaatggccgtagctcagaagcacgcgcgaataacaccttcgagcacaacgatgctgagtacatccaaggcgaaacgatttggacgggggcgaagcagatccgcttcaactaccgcaacgcgcaaggcgagtactccgaccgcgaagtgacggtgcataaggtggtggccggtgaagacgac…	MKLPEPIRPLYVWCGYFVLALGLTAVTSDAEWVKSAMAIYLVWAIVETIRFIRHKKKGKSSQALAQQWIDVAENGRSSEARANNTFEHNDAEYIQGETIWTGAKQIRFNYRNAQGEYSDREVTVHKVVAGEDDTYFVGLCHMRNEPRTFRLDRVYPRNKVTDTATGEINTLRKILGVKRRARS
KB-PA_3-chr1	1459320	1460435	+	CDS	Phage integrase	atgtcgatcaagaaacaggacaatggccagtggttggtggattgccggccagagggaaggtcaggcccgcggatccgccggctggtgaagtcgaagaacgaagccatgcacttggaacgtcgaatcatgggcgacggctccaagggcgagtttgagaagaagccgaaacgcgacgaacgccgcctgagtgaactggtggggctgtggttcaccatgcacggcaacaccttaaagcaaggcgacaagcgacgccgcgaaatgctgaccactgtggcgcgaatcggcgacccgatggtttgcaccttcaccgccgagatgtttgccgactatcgtgctgcccggattgcagggaagtgggggcggctcaaaactgggtcaggcaagaagaaagggcaggcg…	MSIKKQDNGQWLVDCRPEGRSGPRIRRLVKSKNEAMHLERRIMGDGSKGEFEKKPKRDERRLSELVGLWFTMHGNTLKQGDKRRREMLTTVARIGDPMVCTFTAEMFADYRAARIAGKWGRLKTGSGKKKGQAAKPVGAKTLNHELVHLRAMFNELERLEKWTGENPLAKVRALKQDETEMGYLSREQIPLLLAKLDQHPSTVGMVARVCLATGARWSEAMNLTPLQVRDGRIHFVRTKSARNRAVPISAELQKSLEGALPWRSSYSATYKAFELAVAELDLQLPKGQLTHVLRHTFASHYMMNGGDILTLQRVLGHATLQMTMRYAHFSPGHLAEVVNLNPLAQGCGRFVDAEKECEPGVDAQGQAVAQV
Additonal Region 7
KB-PA_3-chr1	1613166	1612921	-	CDS	hypothetical protein	atgggcgatgtcaatagcagcgccgagaagattcggctcgagaccagcgcgctgccggccatgctgcgcaacctgggcgtgtgctttttcctgagtgccacgcttaagaacgatatgacattcaacttgattgacgaccctgaaaggatcgctgctgcttatacgccgatagctggtcaggaagcatttacggttatgcttagtcgtgatccggcgcgctggagatcggttctcggtatcagttag	MGDVNSSAEKIRLETSALPAMLRNLGVCFFLSATLKNDMTFNLIDDPERIAAAYTPIAGQEAFTVMLSRDPARWRSVLGIS
KB-PA_3-chr1	1613947	1613297	-	CDS	hypothetical protein	atgagcctggccgtgctgcgtatctccagccaactgccgaaggccttccgcatcatcccggtaggccgcttccatgcacatgacgggcgcgaaggtgggcattggtatctgatgccagagcgtggtcggcagatcgcggcgctggccaaccagaacagccaggggctgctgatcgacttcgagcatgagagcttgaagaaggccgacgcgcccgaggctggccgcgcgacggtgctggagtggcgcgatgatgggctgtatgtcgcggatgcgagctggacggctgaagcgaaagcccagatcgccagcggcaagaaacgctttatctcgcccgtgttccgcttcaatggggcaaccggggaagtgctggcactggagagcattgcgctgacgggtgat…	MSLAVLRISSQLPKAFRIIPVGRFHAHDGREGGHWYLMPERGRQIAALANQNSQGLLIDFEHESLKKADAPEAGRATVLEWRDDGLYVADASWTAEAKAQIASGKKRFISPVFRFNGATGEVLALESIALTGDPALLGLTDLSQVAVASAQRQSGEDASGSGMTARDREVFEHVFGTSPEALAALHAEKPDTPPEGVTAEDWANLRHVFGDALNNR
KB-PA_3-chr1	1614612	1613947	-	CDS	hypothetical protein	atgttcggcattaacttcaatgcagcggaagaggctgccaaatcactccgtacggctactgctgacttgcgctcgcaacgcagcaagctccaggcactaaaggacagtttgcacgcacagcgcgaggcgctgtatctccaggcgctgagcaaggcggacgccaagctgttcctgttcgactatatcgacgcctgggccgagcaatacctggcgcgcggggtgctggatgatctgtttcagatgatcgccgcaccgaatcgcgacaagacgtttgccgaggccaacaacctgacggtgccttacctctgcctgcgcgatgttgagaccgtgttgtactcgggtgaaatgcccaaagggcagtcgatcttcaaagccttcccactgccgatttttggcgat…	MFGINFNAAEEAAKSLRTATADLRSQRSKLQALKDSLHAQREALYLQALSKADAKLFLFDYIDAWAEQYLARGVLDDLFQMIAAPNRDKTFAEANNLTVPYLCLRDVETVLYSGEMPKGQSIFKAFPLPIFGDGIAMMNASHIGAACFFFGDLVKAKLEQYFDAKYPEPNPDVVGAPMAERRALIQELDRQIGELDSGINQIDAKLRQLGVREPRRLLGGE
KB-PA_3-chr1	1614959	1614642	-	CDS	hypothetical protein	atggctaaaagtaagcgggcggaggtgcgtcgcaacgaatttctggccgatgtggcggatctgacgatgcggattatgaagcgctacggtctcgatgattcccaggcccaggccgccgccgacaacgtggccgacgatctggccgagagctggggtggccagtacatcacggttcccaaggacatcaactatcggagcgctaaacggcgacaggccatcgtcgaagcgttcgatggctccaaccattctgagttggccgctgagttcgggctgtcggtcaactacatctacaagattctgaaaggcgctcaggtctag	MAKSKRAEVRRNEFLADVADLTMRIMKRYGLDDSQAQAAADNVADDLAESWGGQYITVPKDINYRSAKRRQAIVEAFDGSNHSELAAEFGLSVNYIYKILKGAQV
KB-PA_3-chr1	1615757	1615314	-	CDS	Mu-like prophage I protein-like	atgtcctttgccattcagcaggccgcagagttctacatccccatccccgccaaactcaaagaaccgatccggctcttaccctcgggcaacttcgtcagcgttggcggtcgaggtggtcgaaagcaggacttctacctgaacgatgccagcggcaaggcgttggcggatcaggcaaccgcacagccgctaccgttcaaggtcagcttggggatcgataatgagggtgatacgccggcagccggctggttcaagcaactggtttggcgcgcggacggcctctatgtcctcgacctggtgcttgccaagcgtggtgtctctgccgtggtcaacgatgaataccgctacttctctccggtgttctacgccgacaccaatatccctcggcagttgatcggactg…	MSFAIQQAAEFYIPIPAKLKEPIRLLPSGNFVSVGGRGGRKQDFYLNDASGKALADQATAQPLPFKVSLGIDNEGDTPAAGWFKQLVWRADGLYVLDLVLAKRGVSAVVNDEYRYFSPVFYADTNIPRQLIGLLITNDPSLRSRKYG
KB-PA_3-chr1	1616604	1615951	-	CDS	hypothetical protein	gtgacagttcttaatccaatcctgcaaatagaacgaacagaattactgctggagatcgaacggggcgtcgctctgctgctgttcgagcgccatggcttggacaaggccaaagccgaagatatcgctcggcactacgtggaagagcttgctttcatgtatgcaggagagaatttcaccatccccatggattacatttatcgacgcgccatgattgcccaggttctgcttaaggagttcgatggcaccaattttgtcaaactatctcgaaaattcagggttcgtgttaataccgtttacgacatcatcaaaaggttcaagaggcgtgcgaatataactccggagcgtactgagtttatgcggacctgcgttgagagtattgctaatctgatggtgcgcaag…	MTVLNPILQIERTELLLEIERGVALLLFERHGLDKAKAEDIARHYVEELAFMYAGENFTIPMDYIYRRAMIAQVLLKEFDGTNFVKLSRKFRVRVNTVYDIIKRFKRRANITPERTEFMRTCVESIANLMVRKHNFSQPEAEKIGNEVADFIADEFGGIQLVLPWDYSLKTAHLHVELLREFDGSNVQALAEKYQLPVDEIQRALDRYRNLPLRASA
KB-PA_3-chr1	1617658	1617005	-	CDS	hypothetical protein	atgactgccaccgttatccgttccgtgaccattctcggcacctgcctggacatcatccgtgcccagggccggctgtgggttgcagcgcgggatcttgcccaagtactccgctacaaatccgagtcaaccataaggcaggcttactaccgtcaccggaaacatgaagcgttagaaggtcatgtaatcaaggctatcgtaggcggctatgcaggcagtccttgccgtctttttgacgaagtagccgtcatgtttttttgccagcggcgcgaccgtcaatgcgcaattgagctgatgcgctggatcgaagctgggggcatgaggctcgaccagcaaccgcccttgcctggtgtgcaggagatcatcccggaagagatcgagttggccgacgcaccagagccg…	MTATVIRSVTILGTCLDIIRAQGRLWVAARDLAQVLRYKSESTIRQAYYRHRKHEALEGHVIKAIVGGYAGSPCRLFDEVAVMFFCQRRDRQCAIELMRWIEAGGMRLDQQPPLPGVQEIIPEEIELADAPEPPPTATSYLVPSVVDVLQQRLAKDKAYCRDLVKTMVRYCGPDEVDDLTAMIEARISSYLEAHNCPGLNAARYDLYRKYWLQGGEK
KB-PA_3-chr1	1617792	1617655	-	CDS	hypothetical protein	atggcgcttgccgcccttcgcgccgactcaagtctctccagccgtatgagtcggtacaaccaccacatgaactgcgctcgctctctggaactgatcctgggtctggctcgcggcctgcgcactggaggtggaaaatga	MALAALRADSSLSSRMSRYNHHMNCARSLELILGLARGLRTGGGK
KB-PA_3-chr1	1619219	1619338	+	CDS	hypothetical protein	atggcggtttccggtcacggtgaccagtttcccattccggacggtccggagaaaacctacagtgcgtttcaagtcgagatggccgtcaacccgcgcaaacatgggccttccctgggatga	MAVSGHGDQFPIPDGPEKTYSAFQVEMAVNPRKHGPSLG
KB-PA_3-chr1	1619845	1619991	+	CDS	hypothetical protein	gtgaaacaatctctatcgatctattggcagaagatagatgccgaacggttcggcgtttcgacgcctggaaaacggcaggcgcttgccgttttggatgaaggtccagccaggctactcgccactattccaaaacgtcggctgatttag	MKQSLSIYWQKIDAERFGVSTPGKRQALAVLDEGPARLLATIPKRRLI
Additonal Region 8
KB-PA_3-chr1	1730464	1730252	-	CDS	Phage protein	atgatcgactggagcatgttgaagtcacccgaagaccagcaggttgagcagcgggaggccatcagagcgctgcgccgccaggcctattgcaccgagtccgacccgctgcgcctggaggctgagtttgacgccatagccgctggcaccgagccggatctggcggcatgggtcgcagccgtccaggcgatcaaggagcgctatccactcccatga	MIDWSMLKSPEDQQVEQREAIRALRRQAYCTESDPLRLEAEFDAIAAGTEPDLAAWVAAVQAIKERYPLP
KB-PA_3-chr1	1730763	1730461	-	CDS	hypothetical protein	atgatcgttacgttgtcgccgtatgtcgcgctgcccggcagcgatgaacgcttgatgctgagcagagttggcgatgtactcaccgtgaacggccagccgttcgatttcacaccgctcccggagggcggcgagttgccggccgaggctatcgggtcggaatggttcgctggccccgtcgttcgccgtgaggggcgtctagagttcagtctgcggttcccgctggccgacggcgccagcgctaccgctcgcttccctgaaccgctgctggtcgaggccgatggcccggtggagttgccacaatga	MIVTLSPYVALPGSDERLMLSRVGDVLTVNGQPFDFTPLPEGGELPAEAIGSEWFAGPVVRREGRLEFSLRFPLADGASATARFPEPLLVEADGPVELPQ
KB-PA_3-chr1	1731608	1730763	-	CDS	Phage protein	atgactctttatatgggaccgaataccggcttgctgatcaatggcttgccgggagaagggcattacagcgatctgattcggatgtggcgatgggatgactttctgaggcagccggtcgtcaaggggcgcgtcgccacgctgccgaccagcggccaggccgagggtgacacttacattttcaccggggacggggcgaaccagaaccgcctggcccgctggtgggcgactggcgcgaccacgcctatttgggagtacatgccgcccaggttgggctggcgggtgcaggttgcgaacgagacgacgccgagcggccaggtcaagacgtatgagtattccggcagcgcctggactgagctggtaggcgggatggccgacgcgccgagcgacggaaagcgctat…	MTLYMGPNTGLLINGLPGEGHYSDLIRMWRWDDFLRQPVVKGRVATLPTSGQAEGDTYIFTGDGANQNRLARWWATGATTPIWEYMPPRLGWRVQVANETTPSGQVKTYEYSGSAWTELVGGMADAPSDGKRYARQSNAWAGLGAAAVADILGTVSQAGGVPTGAIYEGGSNANGSYVRLADGTQICSSSLLTFTAEASSVGARWTFPANFVSPSMMFGSVVASGAGADYDPGIAARNQGTVYFNSSTNYANLGFLCISSASFTPGAQTRNNRAIAIGRWF
KB-PA_3-chr1	1733815	1731605	-	CDS	Phage protein	atgggcggccgtagcaaagcgcaaactggcggctttcgctacctcatgggcattctcatgggttttgccagggggccgctggatgagctggtcgagatcaaggcaggtgatcgcactgcatggaaaggatcggtcaagagcaaccagacgatccagatcaatgccggcgaattgttcggtggagacaaggccgagggcggcatcgtcgggccgctggacgtcatgttcggcgccccggaacaatcggtgaatcctcgactggcggcgatggtgggcggtctggtacctgcgtttcgcggggtcaccactgctttcttcgacggtcagctctgcgcgatgaacaagtacccgaaagcctggatgagccggtggcgacgagcactcaacggatgggacggt…	MGGRSKAQTGGFRYLMGILMGFARGPLDELVEIKAGDRTAWKGSVKSNQTIQINAGELFGGDKAEGGIVGPLDVMFGAPEQSVNPRLAAMVGGLVPAFRGVTTAFFDGQLCAMNKYPKAWMSRWRRALNGWDGGTWYPEKAVISLTGDQVKAMNPAHILFECQTNRDWGRGKDRGLLDQASYRKAADTLFAEGFGLCLKFRVADELDNFEQTVLDHIGATQFLSRSTGLWTLRLIRDDYDVATLPVFDDDSGLLGIDEDSITSLDGTANQFVVVWHDPITNTDRRARAKNAGAIRAAGGVITTTKEYPGLPTGELAGRVAARDCNVSTSAIRKLQVRLDRRAYALNPGDVFCVRSRKRGIELIVLRAGKIDYGTLTKGTIVITALEDVFGLPAAGTSAV…
KB-PA_3-chr1	1734259	1734029	-	CDS	conserved hypothetical protein	atgtgggtgcaaatcgcgattctggtcgcgtcgtatctgatcagcagcgctacttctgcgaaagcgccgaaaccgaaacctgaggcgctgacttccgaagatcttccgcagaccgaggacggcactggccactacgtgatcttcggcgatgtgtggatcgaggactggatcgtcctcgggaccggtcacgagcggatgcaggcagtcaaatcgaaggggtcgaagaagtga	MWVQIAILVASYLISSATSAKAPKPKPEALTSEDLPQTEDGTGHYVIFGDVWIEDWIVLGTGHERMQAVKSKGSKK
KB-PA_3-chr1	1735087	1734269	-	CDS	Phage FAD/FMN-containing dehydrogenase	atgagcttcagtgatcgcgagcggtcgctcgccgatggccaggcgatcagcttgtacgacttccgcctcggcccgatccgttggacctacacaacagcgaatcgagacatcgagttcaacaacatgacctttcgggcgcggcctgtgagcgacgatggacggcgcatgaccggccaggtcagcgccgacatcatgacggttactggcccgagcgacttagaagtcgcgcagctgtaccggggcgctcggccatcgaaggctccaacactgaccgtctgggacatccactggaacgaaccgcaggggcttgtggtgtggatgggcaggatcgacgaggtgaactggccggccgacagccgggtgcagatcaagtgccggctgctcggcaccgaaccgcgt…	MSFSDRERSLADGQAISLYDFRLGPIRWTYTTANRDIEFNNMTFRARPVSDDGRRMTGQVSADIMTVTGPSDLEVAQLYRGARPSKAPTLTVWDIHWNEPQGLVVWMGRIDEVNWPADSRVQIKCRLLGTEPRTSISLAWGRECPYTVFDHNCRADREQYRVPFTVELRDGNSVTGAGNAIGGYPDAWFRGGYVEWDSGQGVIEQRGIQQHTGNRLVLVGGTSLLAPGTRAVAFPGCDQLIQTCNDKFNNTANCGAVPFLPGKSPFDGDPWW
KB-PA_3-chr1	1736780	1735074	-	CDS	Phage protein	atggcgacgtttccggggttccaggtgccgaagcctgtggaggggatcgttgccggcatcacgccaaacatctccactctggacatgaaccaggacatcaccctgggctcggccagcgcctcgaccttggctggcagctatggggcacaccagccggttgacgtcattcactcggcgtactcggcagttcaccagtccgacctggccgagaacttctacaaccgcatctggctgatccctggccgattggatctggggaacgtcgtgagcgtccaggagcgcccagtctcggtctggaacgcccacttcacgccccgcaccctgtcgcggatcgatcgcgacgccgccgatggcatcagcctggccggccagccgtctccgccgttgccgttcgcggcg…	MATFPGFQVPKPVEGIVAGITPNISTLDMNQDITLGSASASTLAGSYGAHQPVDVIHSAYSAVHQSDLAENFYNRIWLIPGRLDLGNVVSVQERPVSVWNAHFTPRTLSRIDRDAADGISLAGQPSPPLPFAALQERIWTVAVSTDGPPVVDARIVWQLQDEQPLILVITGNRITAWSFAPDWADGVQESLEWLTELLTSTSGLEQRRSLRLSPRRSFEAEFYAEGRERVLLDLSLAGWGGRIWALPVWPDIQLLASVTAAGAQTVECDTRWRDFRAGGLALLRGESAFEYEVVEIQDLTASAIQLARPVQRRWPAGSRLYPIRTAQLTEQPALTRLTDTLYSAQARFLVMDSSDWPEVMPTTTYRGWPVIEQRPEESEDLSLSYQRLLDVLDNETGLP…
KB-PA_3-chr1	1737703	1736780	-	CDS	Phage protein	atggcctatttcacaggaacagcgaacaacccggccgacttgctcgccaagctgcgcgtccacgcggagtcgctcggctgggtcaccgaccgcgcctcggcatcggaatggctttgtcacaacgcggatgggtactggtcattcaatgccggagccaatcagttccagatggcgggcaatacgggattcgacaacgctttggcgtggaacgcgcagccaggcaattccgtacagaacaatccctattcgtcgaaacaaccaaccgttgcccagctcagcggcgggccgttcacccgctaccacttgttcgctaccgctgcttatctgcacctgcacgtcgaaatcgcagctgggcagttccgtccggtgatgatcggctccctgaacaaacgtggcgtc…	MAYFTGTANNPADLLAKLRVHAESLGWVTDRASASEWLCHNADGYWSFNAGANQFQMAGNTGFDNALAWNAQPGNSVQNNPYSSKQPTVAQLSGGPFTRYHLFATAAYLHLHVEIAAGQFRPVMIGSLNKRGVGYTGGQYVCGSVIYSAGQALTNNWSSHPFDGYHIQYSDGGSVLRLDSLDDGPSPEWLPFDYRTNIPRRVVGPGRGNYSSQYHPDVGLIDASANELNSSTTPVPCAIYAFGAQQRSRYVGEVPDFGLCNMAFLAPGDPLVVGSDTWRVYPLLQRGTASDFGNTSAWVGYCFRVLE
KB-PA_3-chr1	1738661	1737705	-	CDS	Phage protein	atggccaccgaattcggcacagccacgaaccaccagaaccttgtcgagcgcctggtccagttcctcaccgcgagcccggacctggtcgcagctgggcaggcttacgagaaggttttcgacaacagcatccccgcgtccggcactgcgatagccgtgcgccaggtgacactgcgcgccccaggactgggcggcaccgacgccatctacatggggattcagagttacggtgatacggcgctggactactacaacctgcgcctgatgggcggcacggcgttcaatcctggagcgattccgcctggcggtgacttctggaccgcgtttgccaactacagcccgcgagttcaggcgctgctgtggaaccagcccatgccgtactggttcttcgccaacggcaga…	MATEFGTATNHQNLVERLVQFLTASPDLVAAGQAYEKVFDNSIPASGTAIAVRQVTLRAPGLGGTDAIYMGIQSYGDTALDYYNLRLMGGTAFNPGAIPPGGDFWTAFANYSPRVQALLWNQPMPYWFFANGRRFWMVAKVSTIYESAGAGFILPPCPPSQFPYPLAVVGSYRGDVATRWSDVSDRHRGISSPVERSCYVRDPAGRWLGFTVASNSNNESDYNNRTLLPLGCARYAGSSDTVINQLRDSFSKFPLKALQFVTRETEGRRYLGDFDGAFYVPTLNSGAEDVIVEDGVDHVVFQTAWRSGNPWLYAIRKD
KB-PA_3-chr1	1742248	1738661	-	CDS	Phage tail tape measure	atgaaagacggccaggctgccgtcgaagctttggcggccgcgatcagggatgtcggtagcaaggcgtccgaggccggcacgggcctgcagaaagtcggtgctaccggcgccgtcgaccaggcccaaggggccatcgacaagctcagccactcgctggatggtgtgagtgccaaggcgtccgaggccggcaagggcctacagaaggtcgggactaccgggggcgttgatcaggcccaaggggccatcgacaagctcggccactcactggatggcgtgagtgacaaagcgtccgaggccagcaaggatctgcagaaggtcggggccaccggggccgtcgatcaggcccaggcctccgtcgacaggcttggccaatccctggactccacaggtaaacgcgca…	MKDGQAAVEALAAAIRDVGSKASEAGTGLQKVGATGAVDQAQGAIDKLSHSLDGVSAKASEAGKGLQKVGTTGGVDQAQGAIDKLGHSLDGVSDKASEASKDLQKVGATGAVDQAQASVDRLGQSLDSTGKRAGDASRQITQVGESAEQQAARIKAMVAASLQQKSAQDEAADSTQRLNTAVQAGNTAWRDSAQAQSNAMNTFHNAERARVQQVAAEKRAAEAAAAAAAETSRQEAAARKLLGAIDPTYRSLAQLADQERQLTEHFRAGRIEATAYASALDRIRARRDVLNGIGNDARTSTVALNSMGAAIRRVQGLLVAGVAGYGVASFSKEVVNTNLQWQQALYTMEAATGSAAKARQELEYVREVSERLGLELLNTSQAYSRLVAAAKETPELGGS…
KB-PA_3-chr1	1742532	1742389	-	CDS	hypothetical protein	atgactcgtcggcagatcctgcagcagctcgacgcggtggagcgacgacatcggcgcgaacgcgctgaacgggtgatcgacgtcaacttcgcttttgcgggcggtcaggacgctgaacgtcacctgcagaagcttctaaaatag	MTRRQILQQLDAVERRHRRERAERVIDVNFAFAGGQDAERHLQKLLK
KB-PA_3-chr1	1743029	1742547	-	CDS	hypothetical protein	atggcgcggaaggtaaccaggaagaaatctgccactggtgcagaggacctgtctgtcatccaccccgaccgcacgataatcattgcaggccgggacgtggtgatgcgcgagtatgggttcttcgagtcgctggagctgctccctctgttggaaccgatcctggtcgaccttgaggagcaagcgaaagcgaacgcgccctggccgggcatcgaggcggttccttctttcctgggcaatcatttctcggtcctggtacatctgattgccaaggcggcttcggtcgatatggagtggatgcgcgggcttggtgcagacgacggctatgaactggtctggtggtggtggatcgtcaatggccctttctgcaagcgctgcgccgagaaacgtctgctgacggcg…	MARKVTRKKSATGAEDLSVIHPDRTIIIAGRDVVMREYGFFESLELLPLLEPILVDLEEQAKANAPWPGIEAVPSFLGNHFSVLVHLIAKAASVDMEWMRGLGADDGYELVWWWWIVNGPFCKRCAEKRLLTAQAIAKQARKRDAGQTPSTTSSPPVTAP
KB-PA_3-chr1	1743772	1743032	-	CDS	Phage protein	atgtctctgatttctctccaaggcaagatctggatggctgagcgcagtgctcaaggcaaggcgttgaagcagacctgggtgggcaatgccccgacctgtgaactgcagttggccaccgaaaccaccaacgtgaccgagagcttcagcggtaatcgcctgcagtacggccagctcgaccgcggaaagaccgcgacgattaacctgacgctcgacgaatggctactgcccaacctgatcttggggctgtacgcgcagcaggtcgccattcccggcgtgacggtaactggcgaggcgcttcccacgccgattgcggttggtgatgtgttccgcctggcaaaacccttcatcagcgatctggtgctcacccagtcgagcactccgctcgtcgcaggaaccgac…	MSLISLQGKIWMAERSAQGKALKQTWVGNAPTCELQLATETTNVTESFSGNRLQYGQLDRGKTATINLTLDEWLLPNLILGLYAQQVAIPGVTVTGEALPTPIAVGDVFRLAKPFISDLVLTQSSTPLVAGTDYKIESATAGLIEFLTAQASAVSAAYESEEAVALTMFTQRPPERWLFLDGIDTETGKPVLVDLFRCKFNPVGTLAMIHEEYGNLPLTGSVLYDPLNAGDPMLGGYGRYIEKKAA
KB-PA_3-chr1	1743982	1743779	-	CDS	hypothetical protein	atgagcaccaagcaagtcgccgataccgctgaagtgaagcgggagaaggtcattctgatcgctgatcacacccatggtgaacagaagtgcaagacgggtgatgagatcagtgtcaccagcatcgagaaagaatggttgattcgccacaagcgcattgctgcgccggccgatcaggccgctgccgccggcaaggcaaaggagtaa	MSTKQVADTAEVKREKVILIADHTHGEQKCKTGDEISVTSIEKEWLIRHKRIAAPADQAAAAGKAKE
KB-PA_3-chr1	1744431	1743979	-	CDS	hypothetical protein	gtgagcaacgctcctttcgatcaccgtctggtcatcgagcgcctcaccgctacggtgccggcgttgcgactgatcggcacggcagcggacttcggagcagttaaggcgctgcgggactatccaacgccggccgcctatgtgctgctcgccgaggaaagcggtgagccgcgaccaaccggcaatagcggtgggcccgcccggcagcgcgtcggcgcgctgttcggcgttgtgctggccgtccgcagctaccgatacgaccagttggccgatgcggccgacgatctccagtcgattctcgaccaggttcgcggcgcgatggtgggctgggtacccagtttgcccttggctaggggaacccagttcgttaccggcaaggtgctggactctgacgacaccacg…	MSNAPFDHRLVIERLTATVPALRLIGTAADFGAVKALRDYPTPAAYVLLAEESGEPRPTGNSGGPARQRVGALFGVVLAVRSYRYDQLADAADDLQSILDQVRGAMVGWVPSLPLARGTQFVTGKVLDSDDTTLLWGEIYSTQHAIGRDP
KB-PA_3-chr1	1744943	1744428	-	CDS	Phage protein (ACLAME 156)	atggactacatcactctcgtccacctcgctgaacgtcctggtgcaaaggagctggctcaagtcgccaccgcccagcacctgaagatcgtcgattccgcgctcctcgatgccgcgttgcgtggtggagatctgagtgcctggacgccggagcaggtggcgggggttgatctcgtcctggagcgaatcaccgaggccatgaccgaggccgaaagcatcgtcaatggttacctggccaagcgaggctacggcctgccgctgagtccggtgcctggcctggttaccggctgggtgcgcgacatcggtcgctacctgctgcacaaggaccgaatctcagacgacaaggacgccatcctgcgcaactacaaggatgccttgaagttcctgcagatggtcgccgac…	MDYITLVHLAERPGAKELAQVATAQHLKIVDSALLDAALRGGDLSAWTPEQVAGVDLVLERITEAMTEAESIVNGYLAKRGYGLPLSPVPGLVTGWVRDIGRYLLHKDRISDDKDAILRNYKDALKFLQMVADGTFSLGAEDPIANNPMLADVRFDADENVFNRQQLRSFR
KB-PA_3-chr1	1745161	1744946	-	CDS	hypothetical protein	atggccagcgccaagggagcggcaggtgaggacgaggtagaagcactgttcgtccgttccgtaccggatagcttccggcgctgtggccatcgcttcacgcgagaaggccacggcattgcactctcgctgttgagcgacgcccaggtcgatgcactgctcaatgatccgaatctggtcgtcgagcactgctcgtttgcactgaaggatgtgagctga	MASAKGAAGEDEVEALFVRSVPDSFRRCGHRFTREGHGIALSLLSDAQVDALLNDPNLVVEHCSFALKDVS
KB-PA_3-chr1	1746289	1745393	-	CDS	Phage major capsid protein	atgattatcaaccagcaaaacctgcggaacctcttcatcggttaccgcgcggcgttccagaatgccttcgcaggtgttcagcccgacttcaaccagttcgtgctgaccgtgacgtccggtaatgcctccgagcagtatgggtggctcggtaactcgaccgcgttccgggagtggctcggcgaccgagtgatccagaacttgggcgtgcacgactacaccatcaagaacaagaccttcgagaacactgtaggtgttcctcgcgagagcatcgaagacgacagctacgggctgttcacccccttgatggggcaattgggccaggactccgcgatgcacccggcggaactcgtctacgcgctgctcagtggtggtttcactcaaacctgctacgacggccag…	MIINQQNLRNLFIGYRAAFQNAFAGVQPDFNQFVLTVTSGNASEQYGWLGNSTAFREWLGDRVIQNLGVHDYTIKNKTFENTVGVPRESIEDDSYGLFTPLMGQLGQDSAMHPAELVYALLSGGFTQTCYDGQYFFDTDHPVTSAAGNEVSVSNFQGGSGTPWFLLDTTRIMKPLILQKRKDYNFVTMDAEKDENVFMRKEYVYGVDARLNAGFGLWQLAYSSKEALDASSFNDVYAAMQSLRGDKGKRLGIRPKLLVVPPSLRSQALEVVKAERNAAGATNINRDVVDVLVTPWLAA
KB-PA_3-chr1	1746708	1746304	-	CDS	hypothetical protein	atggccctgaccaaagaccgcaacaccccacgccgcgacggcatgcagttcaacgacccggtggcggccaacgccaagatctttgccggcagcctggtgtgtctcgacgcttcgggcaacgccgtaccaggagcgctgtcgaccaccattgcggcgcgcggtatcgcccaggagcaggtcgacaacaccggtggcgccgccggcgccaagcgtatcgaaacccgccggggtgtattccagctcgccaacagtgcctcggccgaccagatcacccgcgccgacatcggcaaggagtgcttcatcgtcgacgatcagacggtcgccaagacctccgccactgacacccgctcggttgccggcgtcgtccgcgatgtggatgacggcggtgtctgggtagag…	MALTKDRNTPRRDGMQFNDPVAANAKIFAGSLVCLDASGNAVPGALSTTIAARGIAQEQVDNTGGAAGAKRIETRRGVFQLANSASADQITRADIGKECFIVDDQTVAKTSATDTRSVAGVVRDVDDGGVWVEI
KB-PA_3-chr1	1747823	1746714	-	CDS	Phage-associated protease	atgaaaacgaagccccttctcgccgccatagctctcgccgcctgcaacttcgatatacaggcgccgaccgagggcaatctcatcaccctgcaggtaaccccggccgggcagttcaagccgcgcgacaaccgggaaatgaaagtccccgcctggaatattgacgctgcgttggcagcggctgtcgtgcagcggttcgcggcaaagaaaacgcctccggtgctcgactacgagcaccagaccctgtggaaagaggaaaacgggcagccggcacccgctgctggcttcttccgcgccctggagtggcgtgagggccagggcttgttcgcccaagtcgagctaaccgcccgtgcaaagcagtacatcaccgatggcgagtatcgctatttcagccctgtcttc…	MKTKPLLAAIALAACNFDIQAPTEGNLITLQVTPAGQFKPRDNREMKVPAWNIDAALAAAVVQRFAAKKTPPVLDYEHQTLWKEENGQPAPAAGFFRALEWREGQGLFAQVELTARAKQYITDGEYRYFSPVFLFDPVTGDVLDLQMGALTNNPAIDGMQALSERAAATFQLTIDPSNEEPLVKPLLKAVLAALGLAENTTEEQAIAALSAHTTDLASMRKQLGLDDTAACSAMLAACTGLKAKAATAVDPAKHVPVTVVDELKGEIAALTIRLGQRDEKELDAEIATALEDGRLHKSMEKWARELGKENRASLTAYLSAAQPIAALSGSQTRGQPPVPDEKIGLTADELAVCTAMGITAEAFKAAKEA
KB-PA_3-chr1	1748609	1748034	-	CDS	Phage virion morphogenesis/head protein (ACLAME 112)	gtggctggagtaacccttgaatacagcagtgagaaggtacttgaggcgctgagggcagccgctgatctcatgcgctccccggccccgatattccgtgatatgggcgagtacatgctcatcgccctggacgaacgcttcgagagccagagcgcacctgacggtacgccttggcaggcgttgtccccgacctatcagcggcgaaagcggaagaaccaggacaagatcctggtgctcgatggctatctgaaaaacaccatccgatatcaggccagcgacgacgaactggcggtcgggtccaaccgtgcctatgcagcgattcatcaattcggtggtgaaatacagattgcggctcgcagccagcaagcgtatttcctgcatgacgccaagaccaacgaggtc…	MAGVTLEYSSEKVLEALRAAADLMRSPAPIFRDMGEYMLIALDERFESQSAPDGTPWQALSPTYQRRKRKNQDKILVLDGYLKNTIRYQASDDELAVGSNRAYAAIHQFGGEIQIAARSQQAYFLHDAKTNEVSPQFVNRRRANFSQWVSLGPYTIKIPARPWLGTSNRDDDELLAIAQKHLDRALSGKSS
KB-PA_3-chr1	1749849	1748611	-	CDS	Phage virion morphogenesis protein Mup30, F	gtggcgcttagagcaacctcactgcctttcgccgagcagaaccagttcttccggcgcaagctcaatctgccgaccaacgcctggacggacatctacacccgcgagcatgactatgccttcgtcgtcgccggcgccaaccgcgacgacctggtgcaggacttccgtcaggcagtggagaaggcaatagccgatggcactacgctggaggagttccgccgtgacttcgaccgtatcgtcgccaagtacggctggagctaccggggcgggcgcaactggcgcagtcgagtgatctacgagaccaacatgcgcagcagctacatggccggtcgcctggagcagctcatggctgtgcgcgaggaacgtccttactggcaatacctgcacagcgatgcggttgag…	MALRATSLPFAEQNQFFRRKLNLPTNAWTDIYTREHDYAFVVAGANRDDLVQDFRQAVEKAIADGTTLEEFRRDFDRIVAKYGWSYRGGRNWRSRVIYETNMRSSYMAGRLEQLMAVREERPYWQYLHSDAVEHPRPKHESWNGLVLRWDDPWWQYHFPINAWGCQCSVRALSEDDLRRMGKDGPDEAPPIVWQARTIGQNSPDGPRVVEVPEGIDPGFEYMPGQARLDTAVPQPRNGGPTPPAGLPSTPASDPLPAPRPVPTNQLLDQDMLDADAIKRFLRPFGATLDRPAVFQDVVGQRVVVGREMFASRAGGDLLVAESGMSKKWLMLAAEALRRPAEIWVRLDWVESLKKAVVRRRYLASLQVSGEAAPVQVVVELDANGWAASAAVVQPGQQPL…
KB-PA_3-chr1	1751413	1749839	-	CDS	Phage protein Mup29, H	atggtgactatgacccggattctcggccccgacggccagccgctgcgcctgaacgagatccgtgagccccagaccgcccaactgaccagcctgcaccatgaggtcgctggtcacccatctcgtggactcacgccttcaaggcttgcctcgctcctcgactccgccgagcaaggtgacatcgtcgcccaatatgagctgttcgaagatatggaggagaaggatggccatatccacgccgagatgtccaagcggcgccgcgcggtggcccagttggactgggacatcgttccacccgacaacgcaacagctaaggagaaggaagctgcggcggccttgtacaacctcatgcaaggcctggacgactttgaagaggtaatcttcgataccaccgacgccatc…	MVTMTRILGPDGQPLRLNEIREPQTAQLTSLHHEVAGHPSRGLTPSRLASLLDSAEQGDIVAQYELFEDMEEKDGHIHAEMSKRRRAVAQLDWDIVPPDNATAKEKEAAAALYNLMQGLDDFEEVIFDTTDAIGKGFACQEFDGWQRVDGNWLPKAIIHRPQSWFQLPRGVRQEIRLRGPSGGTPLQPFGWITHVHKSKSGYLERSALFRVLVWPYLFKNYSVGDLAEFLEIYGIPMRVGKYPTGATEKEKLTLLRALAALGHNAAGIIPLGMELDFLNAAQGDPAAFQLMIEWCERTQSKAILGGTLTSQADGKTSTNALGNVHNEVRKDLRDADAKLLAKTLSRDLVYPIAVLNGLVDSWARCPRLVFDVQEAEDLSAYATALPPLVKLGMQIPRSW…
KB-PA_3-chr1	1753080	1751407	-	CDS	Phage terminase, large subunit Mup28, E	atggccatgcgcgcaaccactgccgagctgggtaagaggctcactgcgaccagtgccccgcgtaagatcgacctggccgaggagatggagctgctcggcgtcgacgtgccgcaggaaatctccgaagcccagccggccaatgagcctgtcttcctgccgtaccagcagcgctggttcgaagacgagagccagatcatgatcgcggagaagtcccgccgtaccggcctgacctgggccgaggccgggcgcaacgtgatcaatgccgccaagccgcggcgccgaggtggctgcaacaccttctacgtcggcagcaagcaggagatggcgttggagtacatcgccgcctgtgctctgttcgcccgtgctttcaacgagctggcagaggccgacgtctacgag…	MAMRATTAELGKRLTATSAPRKIDLAEEMELLGVDVPQEISEAQPANEPVFLPYQQRWFEDESQIMIAEKSRRTGLTWAEAGRNVINAAKPRRRGGCNTFYVGSKQEMALEYIAACALFARAFNELAEADVYEQTFWDEGKKEEILTYMIRFPKTGRKIQALSSRPSNLRGLQGDVVIDEAAFHESLEELLKAALALTMWGNKVRLISTHNGVDNPFNTYIQDAREGRKDYSIHRITLDDAIAEGLYKRICYVTGQAWSPESEKAWRDGLYKNAPNIESAEEEYGCVPKKSGGAYLSRVLIEQAMVADHSIRIHRYEAPAGFESWTPELREAEVRTWCEENLQPELARLSDQNRHTFGEDFARRGDLTVFTPLAISPTLRKRVPFQVELRNLTYEAQRD…
KB-PA_3-chr1	1753630	1753082	-	CDS	hypothetical protein	atgggccgcaagtccagcatcgacaagctgccaccggatgtgcgttcgttcatcgagcgctccctgcgcgagaaccgcctgaccctggacgagctgatcgagcagctgcaggagcgcttcccaggcaaggaaaagcccagccgctcagcaatcggtcgatacaaggtcagcttcgacgagatgactcggcgtctgcgtgagcagcaagcgatggccagcctgctggttgaggaattgggtgagaaccccgacgagcgtgcaggcgcgctcctggtgcagtcaatcaccaccttgacgacccatgcggccttcgctgcgcagaacgaggacgaggtcgatatcgaggacgtccgcaagctggctcgggcagccaaggatgtcctgcaggcccgcaaagcc…	MGRKSSIDKLPPDVRSFIERSLRENRLTLDELIEQLQERFPGKEKPSRSAIGRYKVSFDEMTRRLREQQAMASLLVEELGENPDERAGALLVQSITTLTTHAAFAAQNEDEVDIEDVRKLARAAKDVLQARKASMEERRQIEREAREKLLQEQEQRLEEQRGSDGMSEQLENRIRGILLGKA
KB-PA_3-chr1	1753935	1753633	-	CDS	FIG00638990: hypothetical protein	atgactagcaactactccgatttcatcagccaggaccgccgcctggtgatcctgcgcatccttgcggaaatgccgacctaccaggccaatagctcggtgctgcacaccgtcctcagccagtggggacatgatcccagccgcgaccaggtgaagggcgagttgcgctggctggaggagcagcaactggtgaagatcgaggacgtcagcaacggcgcagtgctggttgcgaagctgaccgagcgcggcgccgacgtggccgccggccgcgcccgagtggacggcgtgaagcgtccgggagcctga	MTSNYSDFISQDRRLVILRILAEMPTYQANSSVLHTVLSQWGHDPSRDQVKGELRWLEEQQLVKIEDVSNGAVLVAKLTERGADVAAGRARVDGVKRPGA
KB-PA_3-chr1	1754252	1753932	-	CDS	hypothetical protein	atggacttggacttcgtgctgcgcgccggccagttcgtattcaccgcggcggtgggcctgtactcgctggctgctgcgcgtcgttccagctccaaggccgaggccgagcacctgacgaatcggctctcatcccaggacaaccgacttctcaccctggagcagcagatgctccacctgccggacagccagcagctgtcggagctggccggcgacatgaaagccatgcgcgccgagctgtcggggttggccaaagcgctggaccctttgactcgctcggttgatcgcatcaatgactacctgctcagcgagagacgcccatga	MDLDFVLRAGQFVFTAAVGLYSLAAARRSSSKAEAEHLTNRLSSQDNRLLTLEQQMLHLPDSQQLSELAGDMKAMRAELSGLAKALDPLTRSVDRINDYLLSERRP
KB-PA_3-chr1	1754875	1754252	-	CDS	Phage lipoprotein (ACLAME 899)	atgggcatccttagtctcctgcgctccaactggttctgggttgcgctggttgcagtgctgtacagcgtagctgtagtgatccacggctccgcaagctacgaccgtgggtacgccaccgctcgtgccgaaggcgacgcagcgctgctcaacctgcagctgcagcattccaacgagctggccaagatcgctggggacaacctcctgcagttccaacagcaggtcactcgcgcgaatcaggcggaagcgcgattcctgtcagtccaggaccagttcactgccctccagcaacagctatcggagcgtatcgcccatgtctcgacccaatatcggccggcaccaggtgcttcccctgtgcctgctcctcgcttcgttgtcacttgcggctggctgcgggactac…	MGILSLLRSNWFWVALVAVLYSVAVVIHGSASYDRGYATARAEGDAALLNLQLQHSNELAKIAGDNLLQFQQQVTRANQAEARFLSVQDQFTALQQQLSERIAHVSTQYRPAPGASPVPAPRFVVTCGWLRDYNHALGADLPSPAACRTAASPQETAWPASGADAELLESGVSAADILAHARDYGKWSLTNLAQLNALLDVNDKETH
KB-PA_3-chr1	1755080	1754862	-	CDS	Phage protein	gtgagactgtcctccagcatcaccttggctctgaacgttacctacctcgacctggcggtgattcagcggctgttcgcaggcagtcgcgacttcctaccggcacctgagctgtattgctcgccagtgccgcgcgagcggcatggtaagtccggtgtggctcgggcaaaacgcaaggcgcgcaagtaccgtcggcaaagggggcgccatgggcatccttag	MRLSSSITLALNVTYLDLAVIQRLFAGSRDFLPAPELYCSPVPRERHGKSGVARAKRKARKYRRQRGRHGHP
KB-PA_3-chr1	1755706	1755077	-	CDS	Phage lysin	atgaagtgcctgctcaccctcggcctgctgggcctgctgagcgcctgccagccggccttcgcgacggatcgcatccccactgccgccgagcaataccggcgcaccctggtgcgcagcgcccatgccgaatggggcctgtcggcgccgatcgccacctttgccgcacaggttcaccaggaaagccgttggcgtgctgatgcccgctcgcctgttggtgcccagggtctggcgcagttcatgcccggaaccgcggagtggatcgccggcctgtatccggccgccctcggcaccaatcagccgttcaatcctggctgggcactgcgcgcgctggtcacctacgaccgttggctctacgaccgaaaccaggcctccagcgagtgtgatcgctgggcattcgta…	MKCLLTLGLLGLLSACQPAFATDRIPTAAEQYRRTLVRSAHAEWGLSAPIATFAAQVHQESRWRADARSPVGAQGLAQFMPGTAEWIAGLYPAALGTNQPFNPGWALRALVTYDRWLYDRNQASSECDRWAFVLSAYNGGQGWVNRDRRLASASGADQLAWFDSVERFNAGRSAANFRENRNYPRLILLRYERIYLLWGDGVCGERYTL
KB-PA_3-chr1	1755861	1755703	-	CDS	hypothetical protein	atgggtgccccgcaaatcatctggatcgtgctggccgctgtggtcctggttacgtcctatgcgtgcgatggcctcaccaacgtgatcagcttcaagcagcgcgtgttcgacgtgatcgcgatgacggccctggtgtggtggggaggcttcttcggatga	MGAPQIIWIVLAAVVLVTSYACDGLTNVISFKQRVFDVIAMTALVWWGGFFG
KB-PA_3-chr1	1756160	1755864	-	CDS	Putative inner membrane protein	atgtcatcgccgcaaccccggcgccgccgcgcgccgcgtatgaccagttggacgctggtcaccctcgtcctgctgatcatcctcgccgcgattcgcccggagcagctccaagtcgtcacctataagttggtcctggtgaccttgggtgcggtggccggttactggatcgatcgcagcctgtttccctacgtggcccgcccgcacgaatgctcggccaacctggtggtcgtgggtgcctggctgcgccgtgggctgatcgtgctggcctgtatccttggcctgacgctggggctctga	MSSPQPRRRRAPRMTSWTLVTLVLLIILAAIRPEQLQVVTYKLVLVTLGAVAGYWIDRSLFPYVARPHECSANLVVVGAWLRRGLIVLACILGLTLGL
KB-PA_3-chr1	1757846	1756827	-	CDS	hypothetical protein	gtggcgaacgaaaaagcgaagatcaccttctaccggattgatcagtcaggtttttacagatggggcggggaagagccagagtttggtggcactgctgagatgctcaacgagctacaccagtggagtcagggtaagcaactggcagaaacaaagacgtacgaaccagcagatggatctgacctcctgccagtgtatctcatggatatcaccccaggtcaggacagttggctggtaacaatgtggaatcaaacaccatcagttgatggtaactttgctgcggcaatggggaactctcaagtaggtaataccgaagtagtcttaaaggaaatcccagaagggggaatcccaggtttcgctacgtatttctggtttctacctgaacgcaatgtatttgccagc…	MANEKAKITFYRIDQSGFYRWGGEEPEFGGTAEMLNELHQWSQGKQLAETKTYEPADGSDLLPVYLMDITPGQDSWLVTMWNQTPSVDGNFAAAMGNSQVGNTEVVLKEIPEGGIPGFATYFWFLPERNVFASIKFQHLITGQKPMQEYMESYLTLYSSHAVLTEPDEGVDIELAGYRQRPDAAIQNVSPRFRTALLKKPGDHDLLIEHADQIRKIHRKTTLHLNREPELAFWQRLLQKSLLRQPQVLPDNVRVKYELKVQLDREQVEQIIVSWIDAHDREWDDYGFQLKGEASPHWLSHSIARDEFQLDVIRDNLEVVNARSLLEAIEGRRQAILGIL
KB-PA_3-chr1	1758357	1757857	-	CDS	hypothetical protein	atggacttcaaggtactgcttggagctgtgacgctgatgggcctatcggtcgcgggctgctccaccaaaaactatggtcggcagccggagctgaccgacttcgaacggcagaccatgagctgccgcgagatcgatctggagcaggccaaggttcagggattcctgacccatgtgcgtgaagagagcgagttcgacgggcgctccgtgctgtccttcctgggcgacttcggaattggaaatatgatggagaaggaggcagcggtcgacagtgccaatcagcgcctgacccaactggcgggcgctaagatgcagcgtggctgcacctatgcctatgagactgctccagctcagccagtgtatgcagcgccgcgcgcctatgccccagcgatgcccgcgtcg…	MDFKVLLGAVTLMGLSVAGCSTKNYGRQPELTDFERQTMSCREIDLEQAKVQGFLTHVREESEFDGRSVLSFLGDFGIGNMMEKEAAVDSANQRLTQLAGAKMQRGCTYAYETAPAQPVYAAPRAYAPAMPASASARSVDAQLDELNHMQLPYEEYQRRYREIMGQ
KB-PA_3-chr1	1758846	1759076	+	CDS	Phage protein	atgaaagtcccgtatccgctccctagccgcaagccgtataacggcgaacgtgtcaaagaactcttccaagcctctggtactgctatctcggcctgggctgaggccaacggctacacccgccaccaggtgtactgcgttatcaacggccagtttaagggccgtcgtggcacctcccacgaaatcgccctaaagctcggcatgaagctctccgtcgagcagctcgccgcttga	MKVPYPLPSRKPYNGERVKELFQASGTAISAWAEANGYTRHQVYCVINGQFKGRRGTSHEIALKLGMKLSVEQLAA
KB-PA_3-chr1	1759585	1759361	-	CDS	hypothetical protein	atgactacccccgatcatctggttcttgatgcgtcgatgcgttcggcgtttgtggctcttgcgcgtcgcctgtcgattgatcacgggctggatctggacggccttgccgacgacctggagacgctggcggatgctcagccgggcgatatgtggcaaatgccccaccgcgatctggcaggggtgctgcggcatgttgccgagcggacgcaagtaaccgcgagctga	MTTPDHLVLDASMRSAFVALARRLSIDHGLDLDGLADDLETLADAQPGDMWQMPHRDLAGVLRHVAERTQVTAS
KB-PA_3-chr1	1759709	1760197	+	CDS	Phage protein	atgaagcgccggaactggaagacctgggtgccgcgctcaccctgtgcatccattgagggctgcgtggagcacggtacgcagaagtacaaccgcggggtcgagcgcctcgccatcgatcacctggggcagaccaaccaatccagtctctacaagtggatggccaacggccgattgccgctgtgcctggtggtgcccctggagaaagccaccggcattccactgatcacacgctacctggctgccgcccacggaaagctcctcatcgacattccgactggccgcacgacctcgcccaaggacgtgcagcaattgcagaccgtcctgcatgacgccgttggggcgctcctggcattccatgccggcagccaagacagggacaagaccttggacgcgctgcgg…	MKRRNWKTWVPRSPCASIEGCVEHGTQKYNRGVERLAIDHLGQTNQSSLYKWMANGRLPLCLVVPLEKATGIPLITRYLAAAHGKLLIDIPTGRTTSPKDVQQLQTVLHDAVGALLAFHAGSQDRDKTLDALRAGLESLAWHHGNVTQHETPQLELGDSSDE
KB-PA_3-chr1	1760190	1760417	+	CDS	hypothetical protein	atgagtaaagcccagcagatctatgacgaagtggctagcggcagcccgcgcagtgccgagttcctagccggggttcattacatcctgatgctcaagttggatggagtttcccttcaacgccccacttatccatatccgagttcccagctcgatgcctggatgtgggggtgtgagtacggtcatgacctggtcgctcgtggacgtgaacacgaggtagccacggcatga	MSKAQQIYDEVASGSPRSAEFLAGVHYILMLKLDGVSLQRPTYPYPSSQLDAWMWGCEYGHDLVARGREHEVATA
KB-PA_3-chr1	1760414	1760722	+	CDS	Transcriptional regulator, IclR family	atgaccaccaagcgagtcaacgaaaccgcgctgcgcgtcctgcgcgtactgatcgcgctgaaaggacacaccctgacgggcctttcgaacggcgaagtcgccaaggctctcggtgagagcccggccaatatcacccgctacatgcagacgctcatcgaggccggcctggtcgagcgtagagaagacggccgattcgctcacagcatcagcatgctgcagatcgcccaggcccatgcggaccacgtcagccgcatgcagaaccgcatcaacgaactcaaccgccgggtcgctgccggctccatgatctga	MTTKRVNETALRVLRVLIALKGHTLTGLSNGEVAKALGESPANITRYMQTLIEAGLVERREDGRFAHSISMLQIAQAHADHVSRMQNRINELNRRVAAGSMI
KB-PA_3-chr1	1760733	1761659	+	CDS	Phage protein	atgggacgtactgccaccaaaccgaaacccgcagtagaactgccggagctggatagcgccgctatcaaccagaacatcgccaccatgacggagcacagtgccgaggtcatggcgcagttcggcgatggcctcccttacgaccgcatccgcgtggtcaatgaggcgcgcttctacatggcccagtcggcagaagccatgttggaagccggaaagcgcttgatcgtgctgaaggagcatgagccccacggcgaattcgaacaactgctccgggaacaacttggtattccagagcgaactgcgcaacgcatgatgcaggcttcccttcggttcctttctcccaagcttcaggcaaaagcgccaacgttggcgcttttgggaaagagcaagctctttgaactc…	MGRTATKPKPAVELPELDSAAINQNIATMTEHSAEVMAQFGDGLPYDRIRVVNEARFYMAQSAEAMLEAGKRLIVLKEHEPHGEFEQLLREQLGIPERTAQRMMQASLRFLSPKLQAKAPTLALLGKSKLFELLAEDDESLAELADGGTVAGLDLDDIERMSCRELRKALRDLREDKEAQGRLLANTTENLQNTKLELEKTRRQVETMTADQRAAELRQEVTSMAYEVEVGIMGQLREGFAKLAEQAEEQGADHRAFQAALIVHLESLLEEVRNEFDLPAELGRDQAPDWVGADMAALDAQFADGVGA
KB-PA_3-chr1	1761662	1763443	+	CDS	Phage transposase	atggccgtgtctgccgtcatcacccagcgcctggttgacctcgaccggcagctacagagcgccggtcaagggcagcgcacggcgctatgcaaagcagccgcggcagagctgggtctgtcgctggcatcgctgtaccgcaagctgaaggatgtacaggtgcgcgagcgcgcaccgcgtaagcggcgcaaggactcggggcagagccgcctggggcgtgacgaggccctggtgatcagcacggcgctgatccactcggcccgacataacgcgaagcgcctgtattccgttgctgatgcggtcgaggatcttcgcgccagcggcttgatccgtgcggagtctgtcgaccgacgcaccggagagatccgcccgatgtcgatcagcgcgatcagccgcgcgctg…	MAVSAVITQRLVDLDRQLQSAGQGQRTALCKAAAAELGLSLASLYRKLKDVQVRERAPRKRRKDSGQSRLGRDEALVISTALIHSARHNAKRLYSVADAVEDLRASGLIRAESVDRRTGEIRPMSISAISRALHSYRLHPSQLLAPEPVTELRSLHPNHVWQIDASLCVLYYLKPGANKKASGLQVMDRKEFYKNKPANLDRVAADRVWSYEITDHYTGWIYVRYVMGAESGENFCTVLIEAMQERGGADMLHGVPRILMMDPGSANISAMSKNLCCSLGIEVIVHAPGAARVTGSVENARNIIERKFESKLKFEPVNDLDELNAQAKKWRAHFNATAVHSRHRRTRSELWMTIRADQLIKAPTVELCRELAVRAPESRKVTAKLRVSFGGCEYDISVV…
KB-PA_3-chr1	1763443	1764615	+	CDS	Eha	atgctgaaactcaaggaggtgcttgccggagtcagcaagacccaggccgacctggcccgagcggtcgacctgagcccggcggcgatcgctcaactgatcaatcacggcctttggccgaagtccctcgacaaatctcgcctgtttggcgcggtcgcggactttctatacgagcacggcgcgaacgatgacgacatcgcgctgctggaagaagagatggagccccggcgcgccaacgccgggactcctgcaacccccgaaaacagtcaagaaaacgaggagtgcgagcccatgctaatgcgcaaacaggtgttgctaccagcgacgaagaaggctttcgacatccgtcgcgaccccttcgacgagctgcagagcgctgatgacatgtacgtcagccccgat…	MLKLKEVLAGVSKTQADLARAVDLSPAAIAQLINHGLWPKSLDKSRLFGAVADFLYEHGANDDDIALLEEEMEPRRANAGTPATPENSQENEECEPMLMRKQVLLPATKKAFDIRRDPFDELQSADDMYVSPDIRYVRECMYQVAKHDGFLAVIGESGAGKSTLRRDLVQRLDSESAPVIVIEPYVLAMEDNDTKGKTLKSTHIAESIMAAVAPLEKAKSSPEARFAQLHKALKTSHAAGFRHVLIIEEAHSLPIPTLKQLKRLRELEAGFTKLVSIILIGQPELGTKLSPRNGDVREVVQRIEIVELEPLPVAAVEKHLEFRFGRVGKPLTEVVDASGIQALIERLSTSGRDKTSQLYPLAIGNLMIAAMNLAVHVGEPLVTADVIKGV
KB-PA_3-chr1	1764617	1764958	+	CDS	Phage protein	atgaacgtcgtaccgatcactggccgcctccctgaagagcatccgaaagctacccatctacctctctgcaccgtgctgacgccggagctggcccgctgcctggaagccgtcaacagcgccacccgcgccttgcgccaggccggcattccgattgagcagacgtcggtgctcgatcgccgcctgttcatccgcgaagaggattcgctgcggctgcaccgccgcttccgtaacgccatccgcggcattcgccagaccactcgcgggatggtcaccgtccatgtcgtcagcctgctcggtgttgacgtggcctggacgaccccggtgaaggagcaagaccaatga	MNVVPITGRLPEEHPKATHLPLCTVLTPELARCLEAVNSATRALRQAGIPIEQTSVLDRRLFIREEDSLRLHRRFRNAIRGIRQTTRGMVTVHVVSLLGVDVAWTTPVKEQDQ
KB-PA_3-chr1	1764955	1765239	+	CDS	Phage protein	atgaccgtcatcacccatgcctacaccccgctgatggacgttgacgccatgagcgagcaggactgccggcaagcgctgaaggacgttctgcgcgatgggttcgcgaaggatcagcaactggttgagctaaagaccggcatccacaagctggacagcaccttggtcaagctgatcgacctcttcatcgccggaaacttctccaagctgcatatgcaactgcaggacatggcggtctacctgcaggagcagcgcgccgcctcgaaatcagcaaggagggtgcactga	MTVITHAYTPLMDVDAMSEQDCRQALKDVLRDGFAKDQQLVELKTGIHKLDSTLVKLIDLFIAGNFSKLHMQLQDMAVYLQEQRAASKSARRVH
KB-PA_3-chr1	1765239	1765493	+	CDS	hypothetical protein	atgagggatagcacgcgttacgacactctcgtcatcgagggcgccagcggcaccaccgttcccagagaggtagatggcgggcgtgttgtgtcctgggcgaaggggcatgcactcgccggagccgatccgcttgaagcgttcgtgcaggccctggcccatggcgactacatcaacattcccgcagatgcccttcagctcatggccgaaggcgtcatcgcccgccacaaccgacaactggaggatggctatgactga	MRDSTRYDTLVIEGASGTTVPREVDGGRVVSWAKGHALAGADPLEAFVQALAHGDYINIPADALQLMAEGVIARHNRQLEDGYD
KB-PA_3-chr1	1765486	1765647	+	CDS	hypothetical protein	atgactgagcgccgcctcaaatgccggcgctgccgctggatcggcgcgcttagcgatctccgtccggtgccgcacccgaaggagtcttggcgtagcgacaacgtctgcccgcgctgcgggtgcaaaaccttctctccaattgaggattcctcccatggctga	MTERRLKCRRCRWIGALSDLRPVPHPKESWRSDNVCPRCGCKTFSPIEDSSHG
KB-PA_3-chr1	1765640	1766263	+	CDS	ENSANGP00000000114	atggctgaacaagcagtgcatgttcccgccgggtaccgcatggacgccaaggggcgcctggtacctgaagaaatgatcaagcccatcgacctggagcgcgaccgccttgtgcaggagatcgttgccaaggggaaggctctgaacaaggcgttgctggatttcaaactggcgacattcggcgatatcgaggccttcatcactttgtcggccgagcagtaccaagcgaaggtaggaggcaagaagggcaatgcctctctggtcagcttcgacggtcgctacaaggtcattcgggccatggcagacaacatcgccttcgacgagcgcctgcaggccgccaaggcgctgatcgacgagtgcctccatgagtggacggaaggtgctcgcgcggaggtcatcaca…	MAEQAVHVPAGYRMDAKGRLVPEEMIKPIDLERDRLVQEIVAKGKALNKALLDFKLATFGDIEAFITLSAEQYQAKVGGKKGNASLVSFDGRYKVIRAMADNIAFDERLQAAKALIDECLHEWTEGARAEVITLINDAFRVDQAGNIRTGSVLALRRLQIDDERWQRAMQAIGEAVQVVSTKAYVRIQERVGDTDQYRSIPLDIAGV
KB-PA_3-chr1	1766265	1766954	+	CDS	hypothetical protein	atggaccaggaccgtatcctcgacaagatcaagaagtgcctggaaatggccaaggggcggggttccaacccgaacgaggccgagatcgcgctgcgtcatgcccacaaactgatggaagcctacaacctggagatgggcgacgtgctggccagcatggctggcgaagccagggttcccgccggctcggatggaaaaccgccggcctggcgggtgcgcctcgctcaagtgtgctgccatgccttcggcacgcacctgatcatctgcacctcctatttcgaaagcgcttcgttcctgttcgtcggctgcgcggcggcgccggagctgaccggctacgcctaccaggtgctggagcgacagctgcagaaggcgcgcaaggacttcctgagcacgcagaaacgc…	MDQDRILDKIKKCLEMAKGRGSNPNEAEIALRHAHKLMEAYNLEMGDVLASMAGEARVPAGSDGKPPAWRVRLAQVCCHAFGTHLIICTSYFESASFLFVGCAAAPELTGYAYQVLERQLQKARKDFLSTQKRCKRSTKVARGDAFAHGWIEAVYAKVDQFAGVDDNIADAIQAYMAKHHADVGKFEMKRRKLKARDEVASEAGYAAGKRARLHQGIGHQAVARLTQGV
KB-PA_3-chr1	1766956	1767174	+	CDS	hypothetical protein	atggctagcaatctcgaagtagtcacccaactgatggagtactcgcgctcaggtccattgatgcaggtgatgattctccaagccctggaccagttcagcagtggcgttctggccagcccgaagggttccttgcgcaatgccattgtctcggaagaggcttggagagcttgcgcgaaggaaatccagcagacactttccaagcacttgctggagcaatga	MASNLEVVTQLMEYSRSGPLMQVMILQALDQFSSGVLASPKGSLRNAIVSEEAWRACAKEIQQTLSKHLLEQ
KB-PA_3-chr1	1767176	1767643	+	CDS	Phage protein	atggagcgctatcactcaacggccggcgatccgccgcggcgcgatgctgacgtaaagcggcaggaggcccaggaactggacgaactggttcagcagttcctggccggcggcgggcagatcgagaaagtcgggtacaagatgcgcgagttgccagacactttcgtcatcaaccccatgaagacgccggtatacaacggcgccctggccgagaattcgtcgctcaaagcgaagcctgccgcgccacgtacgcaatccaagaccgagccccaacgctcaccagcgcccgtgccggctttacagccggctcctggcgtgaacccgaaggtctggttgagccggatgatcgccgcccaggcgctgctggccgcgcagacggccaggctcgctcgcgaactgggc…	MERYHSTAGDPPRRDADVKRQEAQELDELVQQFLAGGGQIEKVGYKMRELPDTFVINPMKTPVYNGALAENSSLKAKPAAPRTQSKTEPQRSPAPVPALQPAPGVNPKVWLSRMIAAQALLAAQTARLARELGVSDAELRRLGRRHGMEVFHGTR
KB-PA_3-chr1	1767630	1768196	+	CDS	E16-related protein	atggcactcgctaggggcctgctcagcaagatccacatcgctcgtcagcagctcggcctgcaggacgatgtctatcggcagaagctgcaggtgatgttcggcaagggatcggcgcgggatctcaacctgcgccaggccgagcagttgctgacggagttcaagcgcctgggctggcaaccacagcccagcaagcgagcagccggtaagccgcataattggcggcaactgccagcggaggtcgaggtgatcgaggctcaacttaccaacatggggctgccttggagctacgccgatgcgatcgccaaacgccagtttggcgtagccaaagtggcctggctgaagaagcctgaacagctcaaagcagtgttggctgccctgcatgttgagcaggagaagcgc…	MALARGLLSKIHIARQQLGLQDDVYRQKLQVMFGKGSARDLNLRQAEQLLTEFKRLGWQPQPSKRAAGKPHNWRQLPAEVEVIEAQLTNMGLPWSYADAIAKRQFGVAKVAWLKKPEQLKAVLAALHVEQEKRGLLGSVEELLKLLGEHDPNWRVDLEHLPKGWERRRPILKSLVETLRAAASARGLL
KB-PA_3-chr1	1768196	1768744	+	CDS	hypothetical protein	atgcaattgcagtgcccctgctgcggcgagcagtttccggtagaggccgggttcgcagataccgacggcaagaggctggcggcgctgtttgccggcctcgatccgaaactgggccgcgcaatactcaattacctacgcctgttcagtccagccaaacgaggcctgcgcatgacgcgcgccataaagcttgtggaggagctgctcaacctggtcaatacaggcacagtgcaaaaggatgcccgctccaacgacaccaagccggcttcgccgcgtctatggaccaccggtatcgaacagatgatcaccggccgcgagcgcctgcaactgccgcttgagaaccacaactacctgcgcgcggtggtgtggggcctggccagtgatccagcgcaggctctggcc…	MQLQCPCCGEQFPVEAGFADTDGKRLAALFAGLDPKLGRAILNYLRLFSPAKRGLRMTRAIKLVEELLNLVNTGTVQKDARSNDTKPASPRLWTTGIEQMITGRERLQLPLENHNYLRAVVWGLASDPAQALAASSKRPQAGGPSTQQLLQDQVGRIQSDIVLGLITKEDGERQIAALKGGA
KB-PA_3-chr1	1768741	1769109	+	CDS	DNA-binding protein rdgB	atgaagcaaagttcgattctggcggaaactcgccatgagctgctggacgacattgcggcacatacagcaacagtactgtctgaacatggtattgacgctggcctggctgaacaggccggccatgcggtagctgaccatctggcgaaccagtggcgtggcgccacgctgtacatcccctccgactatcgccaccaggttaccaagcgtgatctccagattctctccgagttcaacggacgaaaccatcacgccctggcccggaagtacggactgacgcccagttctatatataagctgttaaagcgtattcaggatcgtaagttcgaacgtgaccagggcaaactggacctcggcgacggcctggcctga	MKQSSILAETRHELLDDIAAHTATVLSEHGIDAGLAEQAGHAVADHLANQWRGATLYIPSDYRHQVTKRDLQILSEFNGRNHHALARKYGLTPSSIYKLLKRIQDRKFERDQGKLDLGDGLA
Additonal Region 9
KB-PA_3-chr1	1773626	1774150	+	CDS	HipB protein @ Antitoxin HigA	atggctaaaaaaacagccccactcctgccagcgaccagcaagctgctcatcgacttcggcgagcgtctcaaactcgcgcgcctgcgcagaaagctgacggccaaacaggttgccgagcgcgcgggaatgtctcccatgaccctccgttcgctcgaagccggtgggtccggagtgacgatcggggcctacctgtccgtcatgcaggtccttggcttggccagcgacctgaacaagctagccgctgcagatgaacttggccgccagctccaagatgcgcgactggtcaagaacgaagcgatgcaccgccactccatccataaggtggagcgcaaggagcccatgtcggtggggcgcagttcctcttcaggcaccgccatcaagaaggcgacgcaggaccga…	MAKKTAPLLPATSKLLIDFGERLKLARLRRKLTAKQVAERAGMSPMTLRSLEAGGSGVTIGAYLSVMQVLGLASDLNKLAAADELGRQLQDARLVKNEAMHRHSIHKVERKEPMSVGRSSSSGTAIKKATQDRPSTGAREARDTSTGAFIEVRKSTGDLSSLLKKPKRKERSKS
KB-PA_3-chr1	1774147	1775415	+	CDS	Toxin HigB / Protein kinase domain of HipA	atgaccatgatcgccgtgtatgcggactgggatggactgcccgaaccccgtcgactcggtttcctacacagccgcaggacccgagcagccgaacggttcgagttcgcctacgacgaagcgacgctcgccgaccctcagtttgccgggctgcagttggatccgaacattcaggcgttcagcgggccgcagtatcccacgccccccaaggacagattcggcgtctttgacgattcaagcccggatcggtggggacgcttgctcatggatcgcaggttcgagcgtgacaagcgggtggggctggttccttccgatgcgcgtctctacgaatccgactacctgctgggggggcatgacctgtatcgcgtgggcgcgttgaggtatcgacttgaggatgaggga…	MTMIAVYADWDGLPEPRRLGFLHSRRTRAAERFEFAYDEATLADPQFAGLQLDPNIQAFSGPQYPTPPKDRFGVFDDSSPDRWGRLLMDRRFERDKRVGLVPSDARLYESDYLLGGHDLYRVGALRYRLEDEGDFLDNRINVAALPFTEIRTLEQASRALERDPDNVADEGQNWLRMLIAPGGSLGGARPKASVADEAGHLYIAKFPSTRDDYDVGGWEMVVNALADGCELDVAPAHAQRFASDHHCFMVRRFDRTDAGRRLHFASAMTLTGHTDGDDASTGVSYLELAEVLINHGSQTNEDLRELWSRIVFNILVSNTDDHLRNHGFILVPGSGWKLSQAYDMNPAAHADGLKLNITDSDNALDLDLAREVARYFRVNLRVADEIIERFRGIVAQWRT…
KB-PA_3-chr1	1776041	1775490	-	CDS	hypothetical protein	atgccagccttcagctacaagaccagtttttttattgacaccagttacaccaagccgatgcgagcagtttataccatcgaaggaacgggccttaagaccaagctagaacataacgccttcttcagtacctgctacacccccaagagcagtatcgaggtcgacatggggcgtcccgcggcagagcaagtaaaacgcgggtcggtccaggacgttccattcgccctggatgttgtgtgcgaaggtctcaaccccacggtcaagccaccggtgaaagtctatttcgagggcaactccgttcgggatggtttgttgaatgtaaatggtctcggacagactggcgtcgccaaaggcgtggccatctcactgtccaacgacaaaaatgtcgcactgcccttcagc…	MPAFSYKTSFFIDTSYTKPMRAVYTIEGTGLKTKLEHNAFFSTCYTPKSSIEVDMGRPAAEQVKRGSVQDVPFALDVVCEGLNPTVKPPVKVYFEGNSVRDGLLNVNGLGQTGVAKGVAISLSNDKNVALPFSKAKAVALDWQSSGPGIEMYRLSGQARYVTTGAEVAAGKADATLTYVLEYN
KB-PA_3-chr1	1776803	1776961	+	CDS	hypothetical protein	gtggtcggtaacaccatcgtcggtcgctacgtggatcgctataacctgcccatcatgccgggcgagttgcgctggggcacggtcgctgcgactccttgctgcgccttaggtcggacgaaccgcctggatccagccgccgcttgctggaaatccatctga	MVGNTIVGRYVDRYNLPIMPGELRWGTVAATPCCALGRTNRLDPAAACWKSI
KB-PA_3-chr1	1777149	1777739	+	CDS	Phage integrase	atgtacaacgaattgcgtcaactcggcgtcattgactatgagaatccggtagggcgcatgcggccgctcaagcttcaggaaagaccgctgtcgtacctgaccaagcatcaggtgtccgaactgcttacagccctggatgcacgcaccacgtcgccacatccgaagatggttgctcatatctgcctcgcgacaggggctcgatggggtgaggctcaggcgctaacgccggaacgtctgaaaggtaatacggtgatcttcgccaacaccaagtccaagcgtgtgcgctcggcgccgatctcggaagaattggccgccgacattcgccggcattggcagaccctcgggccgttcacgaactgccttggcgtgttccgcctggtgctgctgtcgacctcgatc…	MYNELRQLGVIDYENPVGRMRPLKLQERPLSYLTKHQVSELLTALDARTTSPHPKMVAHICLATGARWGEAQALTPERLKGNTVIFANTKSKRVRSAPISEELAADIRRHWQTLGPFTNCLGVFRLVLLSTSIKLPKGQASHVLRHTFASQFIMNGGHIVTLQHILGHASLSMTMRYAHLSQDHLSEAVRFNPLIG
KB-PA_3-chr1	1778016	1778204	+	CDS	Prevent host death protein, Phd antitoxin	atggtcgtcacgcagaacggtgttcctgcctatgtggttgagtcatatgctgagcggaagcagcgcgatgaagcaattgcgctggtgaagttgcttgcgattggctcccgccagtacgcagaaggcaagcatcgctctgttgatgatttgaaagctcgcctttccaggaggttcgctcagccagaataa	MVVTQNGVPAYVVESYAERKQRDEAIALVKLLAIGSRQYAEGKHRSVDDLKARLSRRFAQPE
KB-PA_3-chr1	1778214	1778561	+	CDS	mRNA interferase RelE	atgtccccggtcgtcattcgttttactgataccgcagagcaaagcatcgaagaccaagtccaccacttggctccattccaaggtgaactggctgcactccagtcagtactgagccttttggatgagattgaagagaagatttcacttgcacctaaaggttacccagtcagccatcaggcgagtcttctgggggtgctgagctatcgcgagcttaataccggcccctatcgtgttttttacgaattccacgaagagcaaggcgaggtggcagtgatcttggttttgcgacagaagcagagcgttgagcagcaattgatccgctactgcttggtggggccaatcgagtga	MSPVVIRFTDTAEQSIEDQVHHLAPFQGELAALQSVLSLLDEIEEKISLAPKGYPVSHQASLLGVLSYRELNTGPYRVFYEFHEEQGEVAVILVLRQKQSVEQQLIRYCLVGPIE
KB-PA_3-chr1	1779479	1778838	-	CDS	Transcriptional regulator, LysR family	gtggacaacatcaccagccaacccgcccacctcaggcttgcgattgcgccaggcgtatcgtcatctcagctctcggcgctgctcgcgctgcaacgagcggaagaacccgaggtcagcatcacgttctttgaagtggcaggtgacgagctgcttgatgggcttcgtgaaggccgctacgacgtgggaatgtcgcttcaaggagcgagcgatccggccctggaaacccagcccttgtggattgagcacatggccgttgcgataccgctgaggcttcccttgcttgagcaggcatcgctcaccatcgccgacctccagaactatccgatctttcgctgggaggctgagacctgttcttcgctggatcgtcggctgctcgcgcgtctgcctgctgacccgcag…	MDNITSQPAHLRLAIAPGVSSSQLSALLALQRAEEPEVSITFFEVAGDELLDGLREGRYDVGMSLQGASDPALETQPLWIEHMAVAIPLRLPLLEQASLTIADLQNYPIFRWEAETCSSLDRRLLARLPADPQNLQYVTSFEMMALWVSAGYGVGVSAQSRIKHAPGWGVSMRPLDDGPYEIVAHLHRPQGQANPVSERFERRALQIAKALPS
KB-PA_3-chr1	1779760	1779906	+	CDS	hypothetical protein	atgggcaagatcgaacgcggggagcatgtgccgacgctgcctttgatactgaaaatcgctgccgcactcgggataagcgccagcgaattgatggccgcgactgaaaagaacctcagcgcgggcagtgagccgcaagattcggcatag	MGKIERGEHVPTLPLILKIAAALGISASELMAATEKNLSAGSEPQDSA
KB-PA_3-chr1	1782515	1780005	-	CDS	hypothetical protein	atgccggatcagccacaagctaaacgcccacacttcattcttcgaaatacatcaaagaccgtcgggtttaccgcacattctccgggcggtggcccaacgcaaaacgtaccggccttgcctcggccgcaacagagtgcgtccctccgagcacaaatcgagatcttgaagcctgctgtggcagaggcggtgcgagttcaaggggaactgcaactggaaagtggccttggcttgcaaatccagttttccagtcaaccggatgttgagctggcgttcgagagcttggcggatgctcgcaagaggattgagcttctcagtgttcgtcacgagggcaaccggaccttcgccaatgtctttgtccctgatggaaagctggcgcatttcgagaaatacatttccgac…	MPDQPQAKRPHFILRNTSKTVGFTAHSPGGGPTQNVPALPRPQQSASLRAQIEILKPAVAEAVRVQGELQLESGLGLQIQFSSQPDVELAFESLADARKRIELLSVRHEGNRTFANVFVPDGKLAHFEKYISDYLEEKKDRNGKARDHRKLIDAIESIRAAEIRALWTDAPELLPDDLATAFWWEVWLPVRGAGQRQIVVEDFKKLARLAECVVSDKQVNFPERTVLLMYGSQQQFSRSVMTLNCVAELRYAKETAEFFDGMGVREQQAWADDLLRRARLQPSDDTAPRVCLLDSGVTRAHPLLAPLMDASDLHTVEPAWGVDDEADHGTGLAGLAAYGDLTDALASADSINVPHRLESVKLIPAEGANEGDARHHAYLFTEGVARPEISAPNRSRVFA…
KB-PA_3-chr1	1783524	1782493	-	CDS	AAA-family ATPase, Atu6082 type	atggctaatgccgaacaactcaaggcgttggtgaaatcccatatcgagcgggatgaccagcacttctattccgtcgccatgcaggtcgcggctcgtgaagccaaggtggggcatggcaagcttgccgaagaactgcgcgacatgatcgacgcggcgaaagcccgtgtctcatcgcatggcaccgagggcaaactggtgccattggcccgtccacgcggtgaactggcgaacttgctgacggtgtcctacccaaagaatcgactgtcggacatggtgctcgatgcggagatggccgaacagcttggccgcatcatgaaggaacagaagcaccattcgcgtatccgcgagcatggcctgtcgccgagacgtaaattgttgctggtcggcccgcctggcacc…	MANAEQLKALVKSHIERDDQHFYSVAMQVAAREAKVGHGKLAEELRDMIDAAKARVSSHGTEGKLVPLARPRGELANLLTVSYPKNRLSDMVLDAEMAEQLGRIMKEQKHHSRIREHGLSPRRKLLLVGPPGTGKTMTASVLAGELGIPLFSVRLDALITKFMGETAAKLRQIFDAINDVRGVYFFDEFDAIGSQRGLANDVGEIRRVLNSFLQMIESDQSHSLIVAATNHVEILDYALFRRFDDVIEYRFPGAPQAARLIQSRLGKFAPKPFPLKALTSRAEGLSYAEIKRAVDESIKEAVMHDEACVKVDMLTRALDERRKLSFRMNHKKAVPNHAGSATS
KB-PA_3-chr1	1783669	1783517	-	CDS	hypothetical protein	gtgcctgtcggcctgctgttcgttctggctgccgaccaaagcgaactgggtgcgatagacgagcacgtcgccgatcagttaatgcagtctgcgctggcatcactgggagcatcggccaacatgacagcgcaggtgggaggccactatggctaa	MPVGLLFVLAADQSELGAIDEHVADQLMQSALASLGASANMTAQVGGHYG
KB-PA_3-chr1	1784859	1783969	-	CDS	Aromatic hydrocarbon utilization transcriptional regulator CatR (LysR family)	atggaactgcgacaccttcgctgctttgtggctctcgcagaagagctgcacttcacacgggccgcagagcgcctgcatatcgaacagccacccttgtcccgcgccatcaaagagcttgaggatgatctgggtgtggtgctcttcgagcgcaaccgccgaggcacggtactgaccgaggcgggagcaacgttcctgcaagatgtgcgcagagtgttcgccgtcctcaaacaggctcaggagaacgtacaggcggtcgctgcgggcctgagcggaagccttcgcattgccgtatccgacggtgcaatcgatcccaggctgtcggccctcctggcccgctgccgcgaggaagagccggagatcgagattcgcctgtccgaagtgccgttggccgatcagttg…	MELRHLRCFVALAEELHFTRAAERLHIEQPPLSRAIKELEDDLGVVLFERNRRGTVLTEAGATFLQDVRRVFAVLKQAQENVQAVAAGLSGSLRIAVSDGAIDPRLSALLARCREEEPEIEIRLSEVPLADQLRGLRSGDFSIGFAHTAEVGDDIVTEPLWHDPLVVAVPARHPLLSHKAVPLHQLAIYPLVLCDPQACEGYHRELARLLRPLERPPDVAEHVSSLDMMLTLVGAGYGVGFITETRIAASLRPDVVIRPLAMDSAVITTYLLRPAGEDSPVSVERFIARLRAHSDD
KB-PA_3-chr1	1785139	1786047	+	CDS	FIG00640418: hypothetical protein	atgccccaccaacagcttgccgatctcacccagccacagcgtgaccgcctcgcgttcgtggaattgcgtctgcgcttcattggggagatgcgccgccaggacttggtcgcgcgttttggtatccagtccgctgccgcgtccagggatctggcgctgtacaaggacttggctccgggcaatatcgactacgacggcaaaggcaagttctacgtcctgggttcgagcttccagccgatcttcgatttcccacccgagcgggtgttgtcgtggctgacccaggggtttggcgacggtgaaccgatgcacatcaaggcgtgggtggccagcgagagcccgtcccggctcactcaccctgacctggcaatcttggcgagcgtcactcgggccattcattacgag…	MPHQQLADLTQPQRDRLAFVELRLRFIGEMRRQDLVARFGIQSAAASRDLALYKDLAPGNIDYDGKGKFYVLGSSFQPIFDFPPERVLSWLTQGFGDGEPMHIKAWVASESPSRLTHPDLAILASVTRAIHYECPLGIEYHSISSGRTEREIVPFALIDNGLRWHVRAFDRKSQDFRDFVITRIRRPVVLKGQPVAAHEMSDQDIQWTRIVELELVPHPDQPRPEITEMDYGMQGGVLRMKLRAATAGYILRKWSVDCSPDHSLRGPEYRLWLKDHLAIYGVRNAVLAPGYASPSTEASIDD
KB-PA_3-chr1	1786060	1789281	+	CDS	DNA/RNA helicases, SNF2 family	atgaagctgatccacaacaccggttcgcagcgcgtcatcgatttgatccgccctcatctcaagcgtggcaatcagctcggttgcgtgacgccttcgttctctctttacgccttcgctgaagtccgagaggctctgtccaccctggaacgggtccaattgattgtgcctcccgacgatgcggtgcttgaactccttggttcggaaggtgaccgtgccgcgcgcaatcgtctgcaggcacgctggttggccaatcagtgcgcgaagtggatcagtgagaaggttgatctgcggcgggcatcaagatcagtgcctcaaggtgcagcagtcatgcgcaggctcgatggaacgcctgaacaagtggtgctggggtcgttcgccttcagcacatcaggccttggc…	MKLIHNTGSQRVIDLIRPHLKRGNQLGCVTPSFSLYAFAEVREALSTLERVQLIVPPDDAVLELLGSEGDRAARNRLQARWLANQCAKWISEKVDLRRASRSVPQGAAVMRRLDGTPEQVVLGSFAFSTSGLGLTPGNPLSLIQASESADEAAQLAQWFDHQWANLQSVSATDSEDKSKGRDAVLEALRALGEHRDPFTIYTLMLHHLFRDSGDEMDEERIVKSATGIRNTVVWKKLFKFQRDGVVGAIDKLNRFGGCIIADSVGLGKTFEALAIIKYHELRNDRVLVLAPKRLRDNWTLYKANDKRNVLAGDRFNYDVLNHTDLSRDGGTSGDIDLSHVNWGNYDLVVIDESHNFRNKATHKGKESRYDRLMRRIIREGVKTRVLMLSATPVNNRLAD…
KB-PA_3-chr1	1789278	1790084	+	CDS	Methyl-accepting chemotaxis protein	atgacggtcatcgacgcgcacgccgttatccaggcattgggcctgcccgacagttgccgggtagagcagcgcgtccccaagaaactgctgttggagaatggtgtgcctacggcgtccgacaaacgcttgatcaccgatgccattgaagaaatccagtggttcgccgcgctcaagcccaacaccatcggcgtgcctgactaccgggacgcgcagcgcgagtaccttgagatcgcagtgctggttgtgaccttgcggggtaccgtcaaacccgccagttgctcgcggctggctgaactggtgcaccgtgcggtgccttatccggtgctgttgctgttggttgaaggacaaacggtggccttgtccctggcccacaagcgctgggcgcagaacgaggccagc…	MTVIDAHAVIQALGLPDSCRVEQRVPKKLLLENGVPTASDKRLITDAIEEIQWFAALKPNTIGVPDYRDAQREYLEIAVLVVTLRGTVKPASCSRLAELVHRAVPYPVLLLLVEGQTVALSLAHKRWAQNEASKVVLDGSLTLALLSHATANATATDAAARSEAEHAFVQSLSIAHQPQTSLHALYQGWMDCVQALQAARRTGNYRTTATPEQAAARRQALADCERLEGEISRLRAQGAKEKQMARQVEINLQLKALLAERQQIAQYL
KB-PA_3-chr1	1790094	1792217	+	CDS	hypothetical protein	gtgaaggccacagaaaccaacctgctcaagttcttgaagaaatctccgcagttcgtcattcccatctatcagcgcaattactcctggacggaagcccagtgccaacagctgtggtcagatttgctgaggtcgggtcgtgacgagcagattaatggccatttcatcggttccatcgtttatgtggagcgtggtctgtccaccgtcaccacccaggaagcactgctggtcatcgacggacaacaacgtcttaccacgtgcaccttgttgattgcagcactggccaagcactttgaagccaatcagctgcctgaattgctggacagtttctccgcgcgaaagctgcacaattactacctgctcaatcctgaagaggacggcgagcgccactacaaactcatt…	MKATETNLLKFLKKSPQFVIPIYQRNYSWTEAQCQQLWSDLLRSGRDEQINGHFIGSIVYVERGLSTVTTQEALLVIDGQQRLTTCTLLIAALAKHFEANQLPELLDSFSARKLHNYYLLNPEEDGERHYKLILSETDKKTLLAIIKSAPMPAEISTRIEQNYTLFQALINKHQDELKAICQGLAKLLIVEVSLDRTQDNPQLIFESMNSTGLELSQADLIRNYILMGLEPKLQTELYQSYWRPMEKSFGQKAYVTHFDPFMRHYLTAKTGEIPNVREVYAAFKAFARASQLDTTALVADIHAYASYYCAMALGAETESKLKEAFHDLRELKVDVAYPFLLDVYHDYKQARLAADELVSIVRLVESYVFRRAICAIPTNSLNKTFPGLSRTLKKDRYLE…
KB-PA_3-chr1	1792217	1794373	+	CDS	Type III restriction-modification system methylation subunit (EC 2.1.1.72)	atgccaaagaataccgagtttgaggagagtctcaccatgaccattaaaaaaatcgataccaccagcccagaagcccaatccgccgatctggtggcgggaaatatcgaacagctcaaagcgctgttcccggagctgatcaccgagggcgcgggcggcgtggccgtgaatgtggacgtactcaaggcgctggtgggcgatgccaccgtcaccgatgccgacgagaaatacggcctcaactggcatggcaagcgccgcgcccggcaattggcgctcacgcccagcacgggcaccctgcgcccctgcccggaagacagcgtggactgggataccacccagaacctgatgatcgagggcgacaaccttgaagtgctcaagctgctgcaaaaaagctatgccagc…	MPKNTEFEESLTMTIKKIDTTSPEAQSADLVAGNIEQLKALFPELITEGAGGVAVNVDVLKALVGDATVTDADEKYGLNWHGKRRARQLALTPSTGTLRPCPEDSVDWDTTQNLMIEGDNLEVLKLLQKSYASKVKLIYIDPPYNTGKDFVYPDNFQDNIKNYLELTGQIEGGEKISSNTEASGRFHTDWLNMMYPRLKLARNLLREDGVILLSIDEHEITNLRSVMDEAFGEENFLSCLTWEKGRKNDAKFFSNGHEYVLVYAKSQSYLREQKTLWREEKPGARDIWNKYLELRVQHGIQDNLIEEGLQAWYSDLPKAHPAKKWSRYKRVDQNGPWRDRDISWPGGGGPRYDVLHPVTNQPCVVPEAGWRYSSSDEMQRQIKLGLVEFRQDHTEPPFR…
KB-PA_3-chr1	1794386	1794556	+	CDS	Type III restriction enzyme, res subunit:DEAD/DEAH box helicase, N-terminal	atgaaactccacttcgagcccaacctcgactatcagatgcaggccatcgaggccgtgtgcgatcttttccgtggtcaggaggtctgccggctctgttgcaaagattggcggcagtcagaggtaggctgtcgctctgcgccgatcaggcggctgctgcgaaatggtggttga	MKLHFEPNLDYQMQAIEAVCDLFRGQEVCRLCCKDWRQSEVGCRSAPIRRLLRNGG
KB-PA_3-chr1	1794471	1795353	+	repeat	repeat region	gccggctctgttgcaaagattggcggcagtcagaggtaggctgtcgctctgcgccgatcaggcggctgctgcgaaatggtggttgagcatgcccatggcctccgtcagcgccgagggcccaatgccaaaagctctctccacaaggcgcacctcgcccctgatgccgggctgcaggcaccaggggcgagcctgtcctttgcgcagggctcgcatgacttcgaatcccttgatcgtggcataggccgtggggatcgatttgaaaccgcgcaccggcttgatcagtatcttgagctttccgtgatcggcctcgatcacgttattgagatacttcacctgccggtgggccgtctcccggtccagctttccttcgcgcttcaattcggtgatcgctgcaccata…
KB-PA_3-chr1	1795292	1794528	-	CDS	Transposase	atgacggatttcaagtggcgccatttccagggtgatgtgatcctgtgggcggtgcgctggtattgtcgctatccgatcagctatcgcgaccttgaggaaatgctggcggaacgcggcatttcggtcgaccatacgacgatctatcgctgggtccagcgctacgccccggagatggagaagcggctgcgctggttctggcggcgtggctttgatccgagctggcgcctggatgaaacctacgtcaaggtgcggggcaagtggacctacctgtaccgggcagtcgacaagcggggcgacacgatcgatttctacctgtcgccgacccgcagcgccaaggcagcgaagcggttcctgggcaaggccctgcgaggcctgaagcactgggaaaagcctgccacg…	MTDFKWRHFQGDVILWAVRWYCRYPISYRDLEEMLAERGISVDHTTIYRWVQRYAPEMEKRLRWFWRRGFDPSWRLDETYVKVRGKWTYLYRAVDKRGDTIDFYLSPTRSAKAAKRFLGKALRGLKHWEKPATLNTDKAPSYGAAITELKREGKLDRETAHRQVKYLNNVIEADHGKLKILIKPVRGFKSIPTAYATIKGFEVMRALRKGQARPWCLQPGIRGEVRLVERAFGIGPSALTEAMGMLNHHFAAAA
KB-PA_3-chr1	1795538	1795332	-	CDS	similar to puromycin N-acetyltransferase	atggacagcgaggagcctccgaacgttcgggtcgcctgctcgggtgatatcgacgaggttgtgcggctgatgcacgacgctgcggcgtggatgtccgccaagggaacgcccgcctgggacgtcgcgcggatcgaccggacattcgcggagaccttcgtcctgagatccgagctcctagtcgcgagggctctgttgcaaaaatcgtga	MDSEEPPNVRVACSGDIDEVVRLMHDAAAWMSAKGTPAWDVARIDRTFAETFVLRSELLVARALLQKS
KB-PA_3-chr1	1796505	1795666	-	CDS	Dihydropteroate synthase type-2 (EC 2.5.1.15) @ Sulfonamide resistance protein	atggtgacggtgttcggcattctgaatctcaccgaggactccttcttcgatgagagccggcggctagaccccgccggcgctgtcaccgcggcgatcgaaatgctgcgagtcggatcagacgtcgtggatgtcggaccggccgccagccatccggacgcgaggcctgtatcgccggccgatgagatcagacgtattgcgccgctcttagacgccctgtccgatcagatgcaccgtgtttcaatcgacagcttccaaccggaaacccagcgctatgcgctcaagcgcggcgtgggctacctgaacgatatccaaggatttcctgaccctgcgctctatcccgatattgctgaggcggactgcaggctggtggttatgcactcagcgcagcgggatggcatc…	MVTVFGILNLTEDSFFDESRRLDPAGAVTAAIEMLRVGSDVVDVGPAASHPDARPVSPADEIRRIAPLLDALSDQMHRVSIDSFQPETQRYALKRGVGYLNDIQGFPDPALYPDIAEADCRLVVMHSAQRDGIATRTGHLRPEDALDEIVRFFEARVSALRRSGVAADRLILDPGMGFFLSPAPETSLHVLSNLQKLKSALGLPLLVSVSRKSFLGATVGLPVKDLGPASLAAELHAIGNGADYVRTHAPGDLRSAITFSETLAKFRSRDARDRGLDHA
KB-PA_3-chr1	1798401	1797601	-	CDS	Class D beta-lactamase (EC 3.5.2.6) => OXA-10 family	atgaaaacatttgccgcatatgtaattatcgcgtgtctttcgagtacggcattagctggttcaattacagaaaatacgtcttggaacaaagagttctctgccgaagccgtcaatggtgtcttcgtgctttgtaaaagtagcagtaaatcctgcgctaccaatgacttagctcgtgcatcaaaggaatatcttccagcatcaacatttaagatccccaacgcaattatcggcctagaaactggtgtcataaagaatgagcatcaggttttcaaatgggacggaaagccaagagccatgaagcaatgggaaagagacttgaccttaagaggggcaatacaagtttcagctgttcccgtatttcaacaaatcgccagagaagttggcgaagtaagaatgcag…	MKTFAAYVIIACLSSTALAGSITENTSWNKEFSAEAVNGVFVLCKSSSKSCATNDLARASKEYLPASTFKIPNAIIGLETGVIKNEHQVFKWDGKPRAMKQWERDLTLRGAIQVSAVPVFQQIAREVGEVRMQKYLKKFSYGNQNISGGIDKFWLEGQLRISAVNQVEFLESLYLNKLSASKENQLIVKEALVTEAAPEYLVHSKTGFSGVGTESNPGVAWWVGWVEKETEVYFFAFNMDIDNESKLPLRKSIPTKIMESEGIIGG
KB-PA_3-chr1	1799881	1799141	-	CDS	Subclass B1 beta-lactamase (EC 3.5.2.6) => IMP family	atgaaaaaattatttgttttatgtgtattcttcttctgcaacattgcagttgcagaagaatctttgcctgatttaaaaattgagaagcttgaagaaggcgtttatgttcatacttcgtttgaagaagctaaaggttggggtgtggtcactaaacacggtttggtggttcttgtgaaaaatgacgcctatctgattgatactccaattactgctaaagatactgaaaaattagtcaattggtttgttgagcggggctataaaatcaaaggcagtatttccacacatttccatggtgacagtacggctggaatagagtggcttaattctcaatctatccccacatatgcttctgaattaacaaatgaacttcttaaaaaagacaataaggtacaagctaaa…	MKKLFVLCVFFFCNIAVAEESLPDLKIEKLEEGVYVHTSFEEAKGWGVVTKHGLVVLVKNDAYLIDTPITAKDTEKLVNWFVERGYKIKGSISTHFHGDSTAGIEWLNSQSIPTYASELTNELLKKDNKVQAKHSFNGVSYSLIKNKIEVFYPGPGHTQDNVVVWLPEKKILFGGCFVKPDGLGYLGDANLEAWPKSAKILMSKYGKAKLVVSSHSDIGDVSLLKRTWEQAVKGLNESKKSSQPSD
KB-PA_3-chr1	1800034	1801047	+	CDS	Integron integrase IntI1	atgaaaaccgccactgcgccgttaccaccgctgcgttcggtcaaggttctggaccagttgcgtgagcgcatacgctacttgcattacagcttaccaaccgaacaggcttatgtccactgggttcgtgccttcatccgtttccacggtgtgcgtcacccggcaaccttgggcagcagcgaagtcgaggcatttctgtcctggctggcgaacgagcgcaaggtttcggtctccacgcatcgtcaggcattggcggccttgctgttcttctacggcaaggtgctgtgcacggatctgccctggcttcaggagatcggaagacctcggccgtcgcggcgcttgccggtggtgctgaccccggatgaagtggttcgcatcctcggttttctggaaggcgagcat…	MKTATAPLPPLRSVKVLDQLRERIRYLHYSLPTEQAYVHWVRAFIRFHGVRHPATLGSSEVEAFLSWLANERKVSVSTHRQALAALLFFYGKVLCTDLPWLQEIGRPRPSRRLPVVLTPDEVVRILGFLEGEHRLFAQLLYGTGMRISEGLQLRVKDLDFDHGTIIVREGKGSKDRALMLPESLAPSLREQLSRARAWWLKDQAEGRSGVALPDALERKYPRAGHSWPWFWVFAQHTHSTDPRSGVVRRHHMYDQTFQRAFKRAVEQAGITKPATPHTLRHSFATALLRSGYDIRTVQDLLGHSDVSTTMIYTHVLKVGGAGVRSPLDALPPLTSER
KB-PA_3-chr1	1801075	1801957	+	repeat	repeat region	ggctctgttgcaaaaatcgtgaagcttgagcatgcttggcggagattggacggacggaacgatgacggatttcaagtggcgccatttccagggtgatgtgatcctgtgggcggtgcgctggtattgtcgctatccgatcagctatcgcgaccttgaggaaatgctggcggaacgcggcatttcggtcgaccatacgacgatctatcgctgggtccagcgctacgccccggagatggagaagcggctgcgctggttctggcggcgtggctttgatccgagctggcgcctggatgaaacctacgtcaaggtgcggggcaagtggacctacctgtaccgggcagtcgacaagcggggcgacacgatcgatttctacctgtcgccgacccgcagcgccaaggc…
KB-PA_3-chr1	1801136	1801900	+	CDS	Transposase	atgacggatttcaagtggcgccatttccagggtgatgtgatcctgtgggcggtgcgctggtattgtcgctatccgatcagctatcgcgaccttgaggaaatgctggcggaacgcggcatttcggtcgaccatacgacgatctatcgctgggtccagcgctacgccccggagatggagaagcggctgcgctggttctggcggcgtggctttgatccgagctggcgcctggatgaaacctacgtcaaggtgcggggcaagtggacctacctgtaccgggcagtcgacaagcggggcgacacgatcgatttctacctgtcgccgacccgcagcgccaaggcagcgaagcggttcctgggcaaggccctgcgaggcctgaagcactgggaaaagcctgccacg…	MTDFKWRHFQGDVILWAVRWYCRYPISYRDLEEMLAERGISVDHTTIYRWVQRYAPEMEKRLRWFWRRGFDPSWRLDETYVKVRGKWTYLYRAVDKRGDTIDFYLSPTRSAKAAKRFLGKALRGLKHWEKPATLNTDKAPSYGAAITELKREGKLDRETAHRQVKYLNNVIEADHGKLKILIKPVRGFKSIPTAYATIKGFEVMRALRKGQARPWCLQPGIRGEVRLVERAFGIGPSALTEAMGMLNHHFAAAA
KB-PA_3-chr1	1802162	1802329	+	CDS	Tn21 protein of unknown function Urf2	gtgtgctgcaaggaaatcccgctcgatgccgccttcaccccggaaggcgcggaatacgtcgagcacttctgcgggttggagtgttatcaacgcttcgaagcgcgtgccaagacagggaacgaaaccgatgccgatccgaacgcctgcgactcgctaccgtcagattga	MCCKEIPLDAAFTPEGAEYVEHFCGLECYQRFEARAKTGNETDADPNACDSLPSD
KB-PA_3-chr1	1802460	1803020	+	CDS	Mobile element protein	ttgcacggtcagcgcatcggttacgtccgcgtcagcagcttcgaccagaacccagaacggcagctcgaacagatccaggtggataaagtgttcaccgacaaggcgtcgggcaaggacacacggcggcccgaactggaacggctgctcgccttcgtgcgcgaaggcgacacggtcgtggtgcacagcatggatcgtctggcgcgcaacctcgacgacctgcgccgcctggtgcagggcctcacccagcgcggcgtacgcatcgagttccttaaggagcatttgaccttcaccggcgaggactcgccgatggcgaacctgatgctgtcggtaatgggcgcgttcgccgagttcgaacgcgccttgatccgcgagcggcagcgcgagggcatcgcgctcgcc…	MHGQRIGYVRVSSFDQNPERQLEQIQVDKVFTDKASGKDTRRPELERLLAFVREGDTVVVHSMDRLARNLDDLRRLVQGLTQRGVRIEFLKEHLTFTGEDSPMANLMLSVMGAFAEFERALIRERQREGIALAKQRGAYRGRKKSLSSERIAELRQRVEAGEQKTKLAREFGISRETLYQYLRTDQ
KB-PA_3-chr1	1803023	1805782	+	CDS	Mobile element protein	atgccacgtcgttcaatcctgtccgccgccgagcgcgaaagcctgctggcgttgccggacaccaaggatgagttgatccgtcactacacgttcagcgaaaccgacctctccatcatccggcagcggcgcggcccggccaaccggctgggcttcgccgtgcagctctgttacctgcgctttcctggtgtcatcctgggcgtcgatgagccgccgtttccgcccttgttgaaactggtcgccgaccagctcaaggtcagcgtcgaaagctgggacgaatacgggcagcgggagcagacccggcgcgagcacctggtcgaactgcaaacggtgttcggcttccagccctttaccatgggccactaccggcaggccgtccagttgctgaccgagatggccttg…	MPRRSILSAAERESLLALPDTKDELIRHYTFSETDLSIIRQRRGPANRLGFAVQLCYLRFPGVILGVDEPPFPPLLKLVADQLKVSVESWDEYGQREQTRREHLVELQTVFGFQPFTMGHYRQAVQLLTEMALQTDKGIVLASTLIEHLRQQSVILPALNAVERASAEAITRANRRIYDALAEPLSDAHRRRLDDLLKRRDNGKTTWLAWLRQSPVKPNSRHMLEHIERLKAWQALDLPSGIERSVHQNRLLKIAREGGQMTPADLAKFEAQRRYATLVALAIEGMATVTDEIIDLHDRILGKLFNAAKNKHQQQFQASGKAINAKVRLFGRIGQALIEAKQAGRDPFAAIEAVMSWDAFAESVTEAQKLAQPEDFDFLHRIGESYATLRRYAPEFLAV…
KB-PA_3-chr1	1805901	1808816	+	CDS	Mobile element protein	atgcagggttggcacacaacgtttttggggatgcgtgggctcccccgcgatatcagcgacttcgagatgaaggcatttttcaccttcgatggtgccgagcgcgacgcaatcaatgcacgccgaggtgattcccacaagcttggtctggcgctccatattggtttcctgcgcatgagtgggcgtttgctcggtgcctttcgggtaattccagtagccttgtggcgccaccttggcaacgagcttggcattgcagcaccagaagtcgcctcgctgagagccatgtatgaacgcgggcgcacgctattcgatcaccaacaagtagcctgcacggtccttggattccagtggatgagcgagcaccagcgccgctcactggtacgtgaactgcgcgacgaagtg…	MQGWHTTFLGMRGLPRDISDFEMKAFFTFDGAERDAINARRGDSHKLGLALHIGFLRMSGRLLGAFRVIPVALWRHLGNELGIAAPEVASLRAMYERGRTLFDHQQVACTVLGFQWMSEHQRRSLVRELRDEVARCADRDQLLVRARQWLYKNKLVIVHERAIRTLIAAALAQLEVETGTAIAASVDPATLDRWRASVSELRPDGQTQQSWLWAAPAKHSTRQISEVLERIDLLYTLDVHKHLADIPDLILRRYARRLVSRPPSAGAKIKEPARTVEVACFLRYCLFTTTDQLILMVQRRIADLWRQAAADVPATVNWAAMYKTLLGELVALSAQGAVPDAELRARLEALITETQKRKPPSRASLVREGLIDGIRPVRSLLVAIAKLPWQATGEHPAIE…
KB-PA_3-chr1	1808999	1809199	+	CDS	Mobile element protein	gtgttgtggaacacggtctatctggaacgggctgcgcacgcgctgcgtggcaacggccatgccgttgatgacgcgctgttgcagtacctgtcgccgctcggttgggagcacatcaacctcaccggcgattacctctggcgcagcagcgccaagatcggcgcgggcaagttcaggccgctacgaccgctgcaaccggcttag	MLWNTVYLERAAHALRGNGHAVDDALLQYLSPLGWEHINLTGDYLWRSSAKIGAGKFRPLRPLQPA
KB-PA_3-chr1	1809385	1809966	+	CDS	hypothetical protein	atgttcgagatgaagaacgagaatgacgaaactgccaccaagaagaagaacgaagacttcctgaaggagctcgacaaggatcgcaccgagaagggctgtgagtatgcggtgctagtttctctactcgaaccggacagtgagttatataacactgggatcattgatatgtcccaccgccacccgaagatgtacattgttcggccgcaatttttcattcccatcatcacgctgctgcgaaatgcggcgatgaattcgctcaagtacaaattggaactggcgctcgtgaaggcgcaaaacatcgatatcacgaacttcgagacccagctggatacgttcaagaccgcattcgcgaaaaactacgacctcgcctccaggcgatttcagacagcaatcgatgaa…	MFEMKNENDETATKKKNEDFLKELDKDRTEKGCEYAVLVSLLEPDSELYNTGIIDMSHRHPKMYIVRPQFFIPIITLLRNAAMNSLKYKLELALVKAQNIDITNFETQLDTFKTAFAKNYDLASRRFQTAIDEIDKSIDHLQKTKEALLGTDRNLRLANDKAQDVTIKKLTRGNPTMAAKFAELKDGGSSDAE
KB-PA_3-chr1	1811839	1809977	-	CDS	Pyruvate/2-oxoglutarate dehydrogenase complex, dihydrolipoamide acyltransferase (E2) component, and related enzymes	atgctctccctgttccagcgaaaacgggcctcggtcgctgccgctccgtcgccaacgccagccactgatcttccgaaagggctgctgcggcccgagtcggccgcatccctactggcgataccgcgccggcaaaagctgctggaacacatctggcagcgcacatcgctgtcgcgcaagcagttcgccatcctctatcgcgctccgctggagtgctacgccgagttggtccagcagttccctgcatcggaggcccatcaccatgcgtaccccggcggcatgctcgaccatggcctggagatcgtcgcctacagcctgaagctacggcagtcccatctgctacctatcggcgccaaccccgaagaccaagcggcgcagtccgaggcctggaccgccgccgtc…	MLSLFQRKRASVAAAPSPTPATDLPKGLLRPESAASLLAIPRRQKLLEHIWQRTSLSRKQFAILYRAPLECYAELVQQFPASEAHHHAYPGGMLDHGLEIVAYSLKLRQSHLLPIGANPEDQAAQSEAWTAAVAYAALLHDIGKIAVDLHVELADGSTWHPWHGPLQQPYRFRYRDDREYRLHSAATGLLHHQLLDRQILDWLSGYPALWGPLLYVLAGQYEHAGVLGELVVQADRASVALELGGDPARAMVAPKHALQRKLLDGLRYLLKEELKLNQPEASDGWLTEDGLWLVSKTVSDKLRAHLLSQGIDGIPANNTAVFNVLQDHGMLKPTPDGKAVWRATVISTTGWSHSFTLLRLAPALIWESGERPAPFAGTVAIDATLAENDASAPATPPAV…
KB-PA_3-chr1	1812151	1812468	+	CDS	COGs COG2002	atgcctgccattcatgaagttgccacgctgacctccaaaggccagatcacgctacccaagtcaatccggcaggcgcttggcgccgataccggcagcaagctcgcgttcgagctgcgtggcagtgaagtcgtcgtgacccgtgctgatgccgagcacgaagaccccgccattgccgcgttcctgacccttctggcccgcgatattgaggctggccggaacattcgcgggttgccgaaggatctggctcgcacgatgctagagcatgcgggccacaaggtgagcctggccgacgatttcgatgaggacgtggaaatttga	MPAIHEVATLTSKGQITLPKSIRQALGADTGSKLAFELRGSEVVVTRADAEHEDPAIAAFLTLLARDIEAGRNIRGLPKDLARTMLEHAGHKVSLADDFDEDVEI
KB-PA_3-chr1	1812468	1812926	+	CDS	hypothetical protein	atgcaacagcatggctggacgctgctgttccacgacaacttgatcgagcagatgatgaaactgcgcgcagctgtgctgcgtgcgcaagagagcgacccggagcgcttcgggtccaacgccaacgtcaagttcttccgggccttggtccagttgatgcaagatgtggtgccgggcgatccagcccgcgacgaatatcgtcagggcaacaccatggggccggcttatcgccattggcggcgggccaaacttggaagacggtaccggctgttcttccggtacgactcgaaggcgaaggtcatcgtatatgcctgggtcaacgacgagcagaccttgcggtcatcgggcagcaagtcagatccatacgcagtgttcgagaagatgctcgggcggggaaatccg…	MQQHGWTLLFHDNLIEQMMKLRAAVLRAQESDPERFGSNANVKFFRALVQLMQDVVPGDPARDEYRQGNTMGPAYRHWRRAKLGRRYRLFFRYDSKAKVIVYAWVNDEQTLRSSGSKSDPYAVFEKMLGRGNPPDDWNALVQVSRQDWSKLE
KB-PA_3-chr1	1812954	1813316	+	CDS	hypothetical protein	atgaacacgacgacccgaatcagcacctcggagcgcctcggccgcaccgtcggtcgtggatggcgcacttatgtgcgtggcgagcgacggttgtcgaactggctcgcctccaagggggtgccggtcgttggtgccgctatgggattgtgggtggtcaagctggtcgcacttggtgtgctgctgtacaccgcgtcttggctggcgctgctgctggtggccgcggtggtggctgcatgggtggcgcgcaatgcgggcctggacgacgacccgaccgagccggaatggcgcaacgggcctgctggattcggtctgtacacctacgatggtttccgaatcgatccgcacatcgaggacgacgagtag	MNTTTRISTSERLGRTVGRGWRTYVRGERRLSNWLASKGVPVVGAAMGLWVVKLVALGVLLYTASWLALLLVAAVVAAWVARNAGLDDDPTEPEWRNGPAGFGLYTYDGFRIDPHIEDDE
KB-PA_3-chr1	1814846	1813323	-	CDS	putative membrane protein	atgacgcttttcacgaccgactacctggagtactacctgaccctcgtgtcctggatcgtccataacggcatctgggcggtgctggtctccagcggtgtcttcgcgctgccgttcgttgcgatcatcgtgcaggaatggttgaaggcccgctcggagggagccgacgaaggcaacaagggtgtgctctcggctgcgcgcatcgagaaccgggtgttcgtcgccatcgtggtggtgatgtttgcgggcatcccgttcatcgacgtggatctcaacaccatccagtacgacagctcgcgctcggcccagtgccaggtcagcgtgccgcagcccacggataccggctggtcgcagtccttcagcaccatcaacaaccagagtgccaaggtgccggtctggtgg…	MTLFTTDYLEYYLTLVSWIVHNGIWAVLVSSGVFALPFVAIIVQEWLKARSEGADEGNKGVLSAARIENRVFVAIVVVMFAGIPFIDVDLNTIQYDSSRSAQCQVSVPQPTDTGWSQSFSTINNQSAKVPVWWGFMHALSRAVTGASVAAIPCGTDLRQMRMEIDATRIDDPVLAQEVADFSRDCYGPARAKLFMQRPNLDETQMHDVTWIGSHFFTDTSGYYDTYRSSTPRDDWPYDSTRDAGLAQVASGGGYPNCRQWWADGSNGLRARLLGQVDPSLLNRLAGWAGFLSRAEVDDSVIRAIASPRQQKLNQGSVYTDYGGQIDKTLPNIVTRAAGDVGMAVGAVAAFPAMDVVRQALPMVLALLKMALVICIPLVLVVGTYDLKTVVTVSVVQFAL…
KB-PA_3-chr1	1815221	1814862	-	CDS	hypothetical protein	atgagcacgacctcgtggcgcccgcgctggctgttcagccggcgcgtggggcaggcactgctgtgggcggtgatgctcgtcgccgcggccgtgggcgccaacatcgtcggtatctacctcgtcggcagcgttgctggatgggagcagtggctggtggctgccgcgggctacttcctggtgtggcggttgtgcctgtatggggcgacggcctatggctgggtctggatgcgccgccggctgctggcacgcgaggaacaaaacgggacagatgggcaggcacggcgccgcctggtgcgcagcgagatcgccggcgtcttcgccatcgtggtgctggaagccagcctgctgatgcagggctga	MSTTSWRPRWLFSRRVGQALLWAVMLVAAAVGANIVGIYLVGSVAGWEQWLVAAAGYFLVWRLCLYGATAYGWVWMRRRLLAREEQNGTDGQARRRLVRSEIAGVFAIVVLEASLLMQG
KB-PA_3-chr1	1816612	1815218	-	CDS	hypothetical protein	atgaagcgtcctgaactgatgaacctctccaccaaggcatgccgcctgctgcgccccacagtgctggccggcgcgctcgccctgggctgcggcctcgcgtgggcgcaggctggcttccagaccagcggccccgtcatcggcgatgaagtcatgtactcgatcggcggcggcagcgcggtatccatgggccgcgccgccggcatgcgctcgatcggggtcggcgtgggctggaacagcaatctcatctgcggcgacatgagcatccagaccacgctgcgcaaccagctcaacggcatcacgaacggcttccagcagatcatgagcaacgtgatccagagcgccacgagcgccgtggcatccctgcctgcgctgatcatccagcgcgccgatcccggtctg…	MKRPELMNLSTKACRLLRPTVLAGALALGCGLAWAQAGFQTSGPVIGDEVMYSIGGGSAVSMGRAAGMRSIGVGVGWNSNLICGDMSIQTTLRNQLNGITNGFQQIMSNVIQSATSAVASLPALIIQRADPGLYNLLTNGVLQARLDFDRSKLTCRAMAERMADTAGGQLGWSQMAEGMALRDAVSSTDAVSAIEQAETRRGNDGVPWVGGSNAGGAGQPAVRVVGDVTRAGYNLVNGRGVTDTSSIAPTSCASLSCQTWTSPQQATEWATRVLGEQVQRTCDACTKTETVPGVGLTPLIQEEYEEKLEALQELVSGTRNTTFEHLRAAGSTSLPITRGVIEALRDEPDKELLARRLASEVALSSVLEKALLLQRTLLTGKKEPNVAANQLAVAAVNHE…
KB-PA_3-chr1	1817570	1816623	-	CDS	hypothetical protein	atgacccgccccttcgagcggatgcgcctcctgcgtgctggcgtggcctcagtgctgctgctcagcgccacgggcagctacgccctcaacaccgcaaccatcgttggctcagtggcatcgccagactgcctcgaataccgcgtcgtcggcatctgctactggctctactgcacctggacgggctgcacggtgcgcacgtccatcaaagttcgccactacatcccggatgcggtcgtctccagctacagcaacaccggcgagaacccctgggtcgaagttcgtccgatgagcacgcccaacccttcggcccaggccggcggagacggcaccaccaacgaagaccacgagaacaatctcgccaagttcaagaacgcggacgtcatcggccaccccggcgtc…	MTRPFERMRLLRAGVASVLLLSATGSYALNTATIVGSVASPDCLEYRVVGICYWLYCTWTGCTVRTSIKVRHYIPDAVVSSYSNTGENPWVEVRPMSTPNPSAQAGGDGTTNEDHENNLAKFKNADVIGHPGVEVFNQFVSSSGYFCEGAGTAFMPYLLSTLDTLAWRYNVPEMAYPEALIPGRREVGARTTLNLWGNVYPRGGFLHQADDHKAGAVVAQRAGDVVTRRGQIHVYQPLLANSRPGYWPAGALMEGDASTGKWQELTPVLSSSCTVFPRSGFLTQAQQGDYAWALWRPYSCCERRGQVFLGSVDFQ
KB-PA_3-chr1	1818013	1817567	-	CDS	hypothetical protein	atgccagcatctttattccgcttcgcatccggctggcgaacccttggcctggccgttgcactgccggcatccttggccgttttcagcccagccaccttcgccgccgatgtggtggtcgtcaccgacagccgccacccggtcaagactatgggtggagagcggctgatcgagctggatgaaggccagcgcatcgaagccgagctttccgcacagctgcccgccgatcccgagcaggccacggccatcgtcaagcgccgcctgaacaacggcggtgccggcctccagcgccgcatcgcttccgcataccagggcgtcgccgacgcctggagcctgggcgtcaccagcattccggcagtcgtggtggatcagcgttacgtggtctatggcgagccggacgtg…	MPASLFRFASGWRTLGLAVALPASLAVFSPATFAADVVVVTDSRHPVKTMGGERLIELDEGQRIEAELSAQLPADPEQATAIVKRRLNNGGAGLQRRIASAYQGVADAWSLGVTSIPAVVVDQRYVVYGEPDVARAVARVAQHRRPQP
KB-PA_3-chr1	1818651	1818157	-	CDS	UPF0758 family protein	atgtctgtcgtcatcaatgactcctgcctggagtcgctttccgatatttctattcagaacgaggactggatcgttcagcaagccatcgtgttgctggagcggcgggttttcaaagcagggccacgccttgagcggcccgcagcggtcagggactaccttcgtttgaagctggtcgccgagcccaacgaaatattcgtcgtcgtgttcatgaacagcatgcacgccgtgctggccgtggagccgatgttccatggaacgatcaatgcgacctcggtttatccacgtgtcgtgctgcagcgagcgttgcaactgaacgccgctgcggtcatcttcgcgcatcagcacccctcgggcaccaccgagccatccaatgcggatcggttgctgaccgagcagttg…	MSVVINDSCLESLSDISIQNEDWIVQQAIVLLERRVFKAGPRLERPAAVRDYLRLKLVAEPNEIFVVVFMNSMHAVLAVEPMFHGTINATSVYPRVVLQRALQLNAAAVIFAHQHPSGTTEPSNADRLLTEQLKTALALIDVRVLDHFVIGQGAPYSFAESGLL
KB-PA_3-chr1	1819590	1818838	-	CDS	Protein-disulfide isomerase	gtgaaaccgaaacgtccttccattcctatgccggtacaggcgctccgccatcggcgctggccctggttcgtggcgattggactgatcacactgctgttgatctggctcgtgtcccgcgcacccagtgaacccgcgttgcaggctcccgcgcaggtcagcaccgcgcaggtggccgggcctccctggcagatgggcaacgcgcagggccgtttcacgctgacgctctatgccgacctcgaatgtccgttctgccgagcgtacttcccgcagctcaagcgctgggtgggtgccaacgcggacgtagctctgcaatggcaccaccagccgctggccgcgcacgaaccggccgcctccgccgaggcacgcctggccgagtgcgccgccgaaagtggcgggcat…	MKPKRPSIPMPVQALRHRRWPWFVAIGLITLLLIWLVSRAPSEPALQAPAQVSTAQVAGPPWQMGNAQGRFTLTLYADLECPFCRAYFPQLKRWVGANADVALQWHHQPLAAHEPAASAEARLAECAAESGGHAAFWQAIEWIYAHTRSDGLGLPEGLRYPGLNPAVEQCLASERPDRVIRAQAEEATKGGVTATPSIRLQDRQTDQAVVLQGPIEGDALLSAMDMLVAEDAAAPPTTEMPADVVGDMPR
KB-PA_3-chr1	1822476	1819606	-	CDS	Type IV secretory pathway, VirB4 components	atgcgctggaaactcccctggccgaagctgactgcatccgacgcagacgatgacgagcagccggacggctggcagcgccacgtcgaggccctgcgtcaggccggcatccccgaacccggcacggcggtccatggccacaggccggcgaccgtggccgacgagcaggcgctgtacgacgttgcgccgtcgttcgcggaattcctgccctgggtggagttcctgccccagtcgaagtcgatgctgctggaagacgggcaatcggtcgcggcgttctacgagctggtgccgctgggcaccgagggccgggaacccggctggctcgcgcatgcccgcgacgccttggagaacgcgctccaggactcgttcgatgaactggacgagaacccctgggtactccag…	MRWKLPWPKLTASDADDDEQPDGWQRHVEALRQAGIPEPGTAVHGHRPATVADEQALYDVAPSFAEFLPWVEFLPQSKSMLLEDGQSVAAFYELVPLGTEGREPGWLAHARDALENALQDSFDELDENPWVLQLYAQDEPSFDQYMQTLRDYVQPRARNTAFTEFYLRFFGHHLRAVAKPGGLFEDTVVTRLRWRGQTRRVRMVVYRRATGQANRRGQTPEQMLNIVCDRLCGGLANAGIQARRMAAADVHDWLLRWFNPRPTLLGPGIEDRERFYALARYPDETEDGEIELASGRDFSQRLFFSQPRSDADHGTWHFDGMPHRVLVTDRLRMPPGTGHLTGETRKGDAINTLFDQMPEDTTMCLTMVATPQDILESHLNHLAKKAVGETLASEQTLKD…
KB-PA_3-chr1	1822916	1822476	-	CDS	putative lipoprotein	atgctctcgaacttgaataagggcctggcgctggcccttgccgtcgcggtgctcggcggctgcgccaccagcaaggaaaagctgctgccccacggcgacagcacgatgatggacatctggcagcagaacgccggtgacggcggcggtggcgccggccaggtggcacgcaggcaattgctcgacgcgcgccagagcctgcgccggccgctgaccgagatggatgtacaggccgcgcccgccgagcagatgcgctacacgcgcacagcgcgcaacgaggtctatcgccagttccagcgcctgccgaatcccgacctggtgatgtacgtgtacccgcacctggcaggcacggacccggtgcccgtgccgggctatacgacggtttttcccttgtaccagcgc…	MLSNLNKGLALALAVAVLGGCATSKEKLLPHGDSTMMDIWQQNAGDGGGGAGQVARRQLLDARQSLRRPLTEMDVQAAPAEQMRYTRTARNEVYRQFQRLPNPDLVMYVYPHLAGTDPVPVPGYTTVFPLYQRVQYAMPGERVEDY
KB-PA_3-chr1	1824315	1822897	-	CDS	hypothetical protein	atgcgcagtaacggactcctgaagtggctgatgatccccgtggccctgttggtgctgttcgtcgccatccggctgttctccggtgggagcacgtcgacacagcccgcagccgatgccggcgcccagctcacgcccgaggagatgaaggcgctgggcatcgagggcgataccccccgcgataccgtggcgaccctggtggcgcaggtgaagcaattgcgcaccgagcttcagaccacgctcttggacaacaagtctcagcgcgaagagaaccagcgcctgcgccagcgcgagaacgccatcgaccagcgcatcaattcggcgctggagaccgagcgctccaacctgcgccgcgaccagcagcaggcagccagcgagcgccagcagaccgagggactgctc…	MRSNGLLKWLMIPVALLVLFVAIRLFSGGSTSTQPAADAGAQLTPEEMKALGIEGDTPRDTVATLVAQVKQLRTELQTTLLDNKSQREENQRLRQRENAIDQRINSALETERSNLRRDQQQAASERQQTEGLLADLQRRLEGIGGRGGGHADLPVGLGLRNGDEAGMEGGVRWVEPDDAKPTDGRNGSRGTGGGMSFPTSFGPAQSTLETTAQTVANAGARAAGVKSAKPVYTVPTNSTLMGSVAMTALIGRVPIDGTVNDPYPFKVLVGPDNLTANGIDIPDVAGAVFSGTASGDWTLSCVRGQVRSITFVFHDGTIRTIPEDREGNQQNNQQRDGLGWISDPYGIPCVSGERRSNAQQYLGSQALITAAGAGVASLIDSDSGQMSYVGADGSIGSVG…
KB-PA_3-chr1	1825237	1824305	-	CDS	hypothetical protein	atgaagcatcctgtactcgcactgctggggctgctggtcgtagtcgcagcacctgtcgcccatgcggtggagatcctgcgctgggaacgtctgccgctggccgtgccgttgcgtgtcggccaggagcgcatcgtgttcatcgacaggaacgtccgcgtgggcgtgcctgccggcgtgggcgaacgtctgcgcgtgcagagcgcgggcggtgcggtgtacctgcgcgccagtgcgccgatcgaaccaacacggctgcaactgcaggacgccgacacgggcgcattgatcctgctggacatcgccgccgagccggccaaggacggcgaagccgagctggagccggtgcgcatcgtcgagggcaacagcaccccggcgcgctatggcgatcagccggagggt…	MKHPVLALLGLLVVVAAPVAHAVEILRWERLPLAVPLRVGQERIVFIDRNVRVGVPAGVGERLRVQSAGGAVYLRASAPIEPTRLQLQDADTGALILLDIAAEPAKDGEAELEPVRIVEGNSTPARYGDQPEGADAPPAHTQNQAGARTARRETPVSVALTRFAAQNLYAPLRTVEALPGVMRVNLRRDMDLTTLMPTLPVRAVALASWRLEDQWVTAVRLTNGSSGWITLDPRVLQGDFLTASFQHEALGPRGTPEDTTVLYLVTRGRGLAQSLLPAIHRFDPAAHLPQPQIETRDNEAADGKETRHAQ
KB-PA_3-chr1	1825923	1825234	-	CDS	hypothetical protein	atgagccgcttcaagaacgagatcacccatctgcaggcgcacatcaagacgcttcgcctgggtgctggcgcgctggtcatcgtcgccctggtgatgggcggcggctggtggagcgctccgcgcgacctgaccatccacgtcccgcctgatctgcgctccggcagtacccgcaagtggtgggaagtgccgcccgaatcggtctatgcgttcacgttctacgtgtttcagaccctccaccgttggcccacgaatggcgaagaggactacgcacgcaaccttcacacactctcgccgtatctcacgccgtcctgccaggctttcctgcgagccgactacgactaccgccgcagcacgggtgagttgcgccagcgcgtgcgcggcatctacgaaatcccgggc…	MSRFKNEITHLQAHIKTLRLGAGALVIVALVMGGGWWSAPRDLTIHVPPDLRSGSTRKWWEVPPESVYAFTFYVFQTLHRWPTNGEEDYARNLHTLSPYLTPSCQAFLRADYDYRRSTGELRQRVRGIYEIPGRGYGDDPTTRVRVVSDRDWVVTLDISADEYYGAEQVKRALVRYPIKVTRVDIDPARNPFGLVLDCYEGAPQRIGAPEPTRPAPGGLAPQAPQGETP
KB-PA_3-chr1	1826330	1825920	-	CDS	hypothetical protein	atgtccgagcagcagcacgtccgtgctgacgggacggtcacgttccttccgcaccggctcaaccgccatcccgttgtcgtgcgcggcctcaccgccgacgagctgtggatctgctgcggcctgtccggtgccgccggcctgctggtcggtgcgccgctgtcctgggtgttccgcacgatcgcgctcgcgcccacgttcgtcgtgctgggcgtggccttcggcgtgttcatcgggggcggcatcctgcgtcgcctcaagcgtgggcgtcccgacacctggctgtatcggcaactccagtggcgcatcgccacgcgctatccgctggtggcgggctgggtgggcggccatgtgctgatctcacgctccggcttctggaccacccgaaggtctgctgcaagg…	MSEQQHVRADGTVTFLPHRLNRHPVVVRGLTADELWICCGLSGAAGLLVGAPLSWVFRTIALAPTFVVLGVAFGVFIGGGILRRLKRGRPDTWLYRQLQWRIATRYPLVAGWVGGHVLISRSGFWTTRRSAARGAR
KB-PA_3-chr1	1826702	1826343	-	CDS	hypothetical protein	atgcaaaaccgcatcctcacttcccgttttgtccagcgcaccaccgtggctctgggcgccgccgcgctgccggcgctgtcgttcgcgcaaggcctgccgcagttggagaacccgacccggggcgccggcagcggcatcatggagacgatcaggaactacggctacgacatcatcatgctcgtggccctgctggttgtggcgtcgatgttcattggcgtgtgctaccacgcctacggcacctacgcggaaatccacactggtcgcaaaacctggggccaattcggcctcacggtcgccatcggcgcggtgctgctcgtgatcggcatttggctgctcaccgaagccaccggcatcctgtaa	MQNRILTSRFVQRTTVALGAAALPALSFAQGLPQLENPTRGAGSGIMETIRNYGYDIIMLVALLVVASMFIGVCYHAYGTYAEIHTGRKTWGQFGLTVAIGAVLLVIGIWLLTEATGIL
KB-PA_3-chr1	1826952	1826719	-	CDS	hypothetical protein	atgaacggcgcccaagtctcggcatttcaagccaacagcggcatcgcgccttccgcgatggcgaccgtcctggtcggcgtcgtgttcgcggtcctgctcgtctggggcgtctgggccatccgaacggcttacgtagggtggtccgagagccgcctcaaccagcgccagttcctcggcgtctgcatccgcttcgtcgcgatgtacctcgtcctgagtttcttcctcctctcctga	MNGAQVSAFQANSGIAPSAMATVLVGVVFAVLLVWGVWAIRTAYVGWSESRLNQRQFLGVCIRFVAMYLVLSFFLLS
KB-PA_3-chr1	1827329	1826949	-	CDS	Candidate type III effector Hop protein	atggtggcttcaacctggctgcgtgccgcgcatcgcggcgtgcccacttttctcgtgacggccctcctgctgggccagtccccgatggcgttggccgagccccccgcgcagcgtcaggaattggtcgcggcgctgcgccagctcgacgcgctggagcgcaccgtcgccgacagcgccgcgcatgctcccgtccagccgggcgagcgctaccacttcgattacccgcggctgctggctgacctagcgcgcgtgcgcgccggcatccaggcgcacctctctccttcgcgtgctcagccgcgcgaccccgccgagctggccggcgactaccgcaccgagcgggccgtcgagccatcgccgacgaccgcggaggccaagccatga	MVASTWLRAAHRGVPTFLVTALLLGQSPMALAEPPAQRQELVAALRQLDALERTVADSAAHAPVQPGERYHFDYPRLLADLARVRAGIQAHLSPSRAQPRDPAELAGDYRTERAVEPSPTTAEAKP
KB-PA_3-chr1	1827491	1828861	+	CDS	hypothetical protein	atggggctaaagaccgagctgaaagctctggtggatgagttagatcgcgtgcacaagggggccactccatggtccgaagaggccggcattcctgatttcatcaccgctgagaacggtatgcagcggtacttcaccaagaaggcaagagaggcgcttgggcagttctccagcaccctccatcagaatcggactctgaactcagtgaagatcgaacccgaggcctttcagaaaattgcccgccaagccgttgccgatatgcacgcctcgggtgagctttcggggtttgatgaatgcgatcagggcgggctgcttcccaaactgaaattgcttatcgaggaacgactcgcaagcatcaccaacgaacacacgcactatttccctgcctggaccctgggcatg…	MGLKTELKALVDELDRVHKGATPWSEEAGIPDFITAENGMQRYFTKKAREALGQFSSTLHQNRTLNSVKIEPEAFQKIARQAVADMHASGELSGFDECDQGGLLPKLKLLIEERLASITNEHTHYFPAWTLGMERKSPFSLGPVTFLNRSDWIDSVDFPQQGKDHYLNQPEANHRWKEILKDALQKANDGSSIEGLANAVYSAIVGCPALVKVTVRGYEREFSRKLARLVGKTALDAISLGFGAPECFLQQALQDERLPPAGSDRLVETKGFLWLPGSSLGKRIPSQPPERVRQALDDMTSILPAFAAILDGLLDPSSHPHPKLANRWATALDWFGEGNRELSDAIALAKLGTCLDVLSCGGRNGGICKMVVHLTGTSDDTQVIRGNRPRTLKQLVKDI…
KB-PA_3-chr1	1829611	1828862	-	CDS	putative membrane protein	atgagcgatgccgccggcaccacacgaagggagcaaggccgccgccagggtctggtcatcggcacgatcacgctgccttttcggctgcttggggtactgatcggctcgctgctgttctccatcgtcatggagtgcgtgggcatgcacttgttctggaaggatcaaagctggcggcactcccagcagatgctgcagtacgagctggggcacctgtctagccatttcacgcgcagcgtgatcgtgcaggagccggggcgcacagcgcacgagttggtagataccggctacgaatgggtgttcgtgcgttcggggctgctggagcgcatgagccagaccgccgagcgcgcccgtgcgtcgagccagggccagacgcgcaacttccgctatttcatcagccaa…	MSDAAGTTRREQGRRQGLVIGTITLPFRLLGVLIGSLLFSIVMECVGMHLFWKDQSWRHSQQMLQYELGHLSSHFTRSVIVQEPGRTAHELVDTGYEWVFVRSGLLERMSQTAERARASSQGQTRNFRYFISQVYVWTESYLIAAAFTTLTFLVRLLVLVLTLPLIFTAAFVGLIDGLVRRDVRRFGAGRESGFIYHRAKASLMPLAVLPWVTYLALPVSVHPLLILLPSTALLGLGISLTAGSFKKYL
KB-PA_3-chr1	1831794	1829608	-	CDS	Coupling protein VirD4, ATPase required for T-DNA transfer	atgtcggggaaacagccggtcgaggttttgctgcgcccagcggtggagttctataccgtcgcggcgtgtgcaggcgccgcgtttctgtccctggtggccccgtggtcgctcgcgctgagtccggccatgggcgtcggcagtgcgctggcgttctgcgcctacggtgccatccgctaccgcgatgcccgcgtcatcctgcgctaccggcgcaacattcgccgcttgccgcgctacgtgatgaccagcaaggacgtaccggtcagccagcagcgtctgttcgtggggcgcgggtttctgtgggagcagaaacacacccatcggctcatgcagacgtaccgaccggaatttcgccgctacgtcgagttgacgccggcctaccggctggcgcgcaggctggag…	MSGKQPVEVLLRPAVEFYTVAACAGAAFLSLVAPWSLALSPAMGVGSALAFCAYGAIRYRDARVILRYRRNIRRLPRYVMTSKDVPVSQQRLFVGRGFLWEQKHTHRLMQTYRPEFRRYVELTPAYRLARRLEERLEFAPFPLSRLPALTGWDVSFNPVRPLPPVGGLPRLHGIEPDEVDVSLPLGERVGHSLVLGTTRVGKTRLAELFVTQDIRRKNADGEHEVVIVIDPKGDADLLKRVYVEAKRAGREGEFYVFHLGWPDISARYNAVGRFGRISEVATRVAGQLSGEGNSAAFREFAWRFVNIIARALVELGQRPDYMLIQRHVINIDALFIEYAQHYFAKTEPKAWEVIVQIEAKLNEKNIPRNMIGREKRVVALEQYLSQARNYDPVLDGLRS…
KB-PA_3-chr1	1832347	1831799	-	CDS	hypothetical protein	atgacgaacctccctctgagcaacttcacgctgaagggtctgctcgtgctgctggcggctctgccgctggcctcgcgtgccggcgagccgctgatcgtggtcgaagaccgtggcggcgcgtcggcgctgccgtactacgaggctctgaaccttcagccgcgcgccgatgcgccggcccgaccgcccatcccaatgctcccggtgcccgccacgcccatggacgaggccgcgatgttgccggtgcgcagtgccaagctcacacctggcaccgtcgcgcggcgggtgatagaggcgccgggcctgcggccctttgtggtcatcggcgacgacgaggcgtcccgcgcctggcttcgtcgtcaggcggcctcgctgcgccagcgcggcgcggtgggcctggtg…	MTNLPLSNFTLKGLLVLLAALPLASRAGEPLIVVEDRGGASALPYYEALNLQPRADAPARPPIPMLPVPATPMDEAAMLPVRSAKLTPGTVARRVIEAPGLRPFVVIGDDEASRAWLRRQAASLRQRGAVGLVVNVETVQGLARLRALVPGVALAPVAGDDLAERLALRHYPVLITATGIEQ
KB-PA_3-chr1	1832949	1832344	-	CDS	Soluble lytic murein transglycosylase and related regulatory proteins (some contain LysM/invasin domains)	atggcagcgccagccatagtggccacctccgtttcgcagtgcttgcgcgcactggtgatcgcggcgggcctgtgcgcctgcgccgcccatgcccaggagcttccgccaccggcttaccagcttgccgcacagcgcgcaggcatcccctcgacggtgctctacgccgtagccttgcaagagagcggcatccgacgcaatggacgcatcgtcccgtggccgtggtcgctcaacgtcgctggccagtcgcgtcgttacgcaacacgcgccgacgcctgcgccggtttgcagcaggcgatgcgcgccacgccgcacacgcgcatcgacgcgggccttggccagatcaacctcggctaccaccaacagcgctacgccagcgcgtgcgacctgctcgacccgtac…	MAAPAIVATSVSQCLRALVIAAGLCACAAHAQELPPPAYQLAAQRAGIPSTVLYAVALQESGIRRNGRIVPWPWSLNVAGQSRRYATRADACAGLQQAMRATPHTRIDAGLGQINLGYHQQRYASACDLLDPYRNLSIAAEILKEQHTTGEDWLLAIGRYHRPAGGEPAARYRRSVSRHLARVQGTHPTTAALAARQETSP
KB-PA_3-chr1	1833668	1832931	-	CDS	probable exported protein STY4558	atgaagcctgccattatcctttccgcgcttctgctggtgtctgcccagttgtccgcttgggcgcagcaaccgaccacggcccccgccggcaatgcccagagccaggagcgtccgctggtcactcgcgccttggacgaccgggtggcaagcgactggggcttgcaaccgcaggagtgggcgcgctatcgcgaactgatggatgggccgctgggtatctactcacccaacctggacccgctgtccgccctgggcatcgaggcgcgcaccgacgaggaacggctccgctacgcagagctgcaggtacagatcgaggcacgccgtgtcgagaagctgctcgcctaccagcgtgcctacgacgaggcctggcagcgcctgaatcccggcatgcagcgggtgaac…	MKPAIILSALLLVSAQLSAWAQQPTTAPAGNAQSQERPLVTRALDDRVASDWGLQPQEWARYRELMDGPLGIYSPNLDPLSALGIEARTDEERLRYAELQVQIEARRVEKLLAYQRAYDEAWQRLNPGMQRVNLPDDKPDTGTSANPLRGSGRTAVFIKDGCAACGQLVQRLQSSGTEFDLYMVGSRQDDTRIRDWAKRANVDPARVRSGGITLNHDGGRWLSLSLPGDLPAVVREVNGQWQRQP
KB-PA_3-chr1	1834324	1833683	-	CDS	Methyl-accepting chemotaxis protein	atgaatgccgcgcagtctccccgtcgcccgatcaccgccatgatgttgcagagcctgatgtggctctggctgatcggcctcagcgttttcgtcgctctcggctaccaggcggtgaacgagcaggtcgaccaggagctgcttaattcccgcctgcaacgtctcgaagcgcaggcggtaggtctggccgaggccattgaggccatccagcagcgtccaaccgtcgcaacggcggcagaccttaaagacacccgcgaactcctggaagcacgcgctgcccaggtcgagacaacgctgagcggctatgccgctgctgacgaccttcaggcgctgcgcacggaggtcgagcaaatcaagacgcgccagaccgttgcgcgcaccgcagcacccgctcagccgcgc…	MNAAQSPRRPITAMMLQSLMWLWLIGLSVFVALGYQAVNEQVDQELLNSRLQRLEAQAVGLAEAIEAIQQRPTVATAADLKDTRELLEARAAQVETTLSGYAAADDLQALRTEVEQIKTRQTVARTAAPAQPRTPRRPNAKPEPLPLPFRIVGAELRAGQRSLSVAPSSGDFTPDQLEVLLPGDSLGPWRFQAVEGNSAVFQAGDQTRRVAIP
KB-PA_3-chr1	1834899	1834321	-	CDS	PilL protein	atgcccgccatccatgtatcccggcgtctggtcggcgctggtctcctggccgctgccctggccagcggctgcgccaccacgaccgcgccactggcaccagacgccatagaggaaatcgcctccgttccccaacccgaggcacccgagttcattcccgtcgtgcgctatggccgctacacgctggttgagctggcaccctcggcagcgcagcgtgacttgctgttgcagaccatcgatgtgtccatgccggaggatgcccgtgccacggtgggcgatggcctgcggcatgtgctcaaacgcagtggttaccagctttgcgagatggcccacgccgtgaccgagttgtatgcgctgccgctgccggcggcgcacctgcatcttggccccatgaccttgcgc…	MPAIHVSRRLVGAGLLAAALASGCATTTAPLAPDAIEEIASVPQPEAPEFIPVVRYGRYTLVELAPSAAQRDLLLQTIDVSMPEDARATVGDGLRHVLKRSGYQLCEMAHAVTELYALPLPAAHLHLGPMTLRDALLTLAGPAWELHANDRARQICFEQAGGSATAEHEHEPPAAEAVQTFPLMPSVSGGQP
KB-PA_3-chr1	1837412	1835133	-	CDS	Superfamily II DNA/RNA helicases, SNF2 family	atgcccgttgatctcgacaccaccgccagcaatgcagcgcccgtaccgggcgaactgctcgaagcggaatcatcccctctgaccctgagccttcaggattttgtcggcgagttcggcgacgaactgcttgattctctcaaccgcgccaacccgccggtctataccggccaagcgcaagcacagcggcaactcgtcgttgccagcctcaagcgcaagctgttccaggcccaggccgacgttgtccatgctgccgccgagctgctggtcgatcaaggcgaacgcgctgcgatcgtcaatggcgaaatgggctgcggcaaaacgaccgtcggcatcgccacggccgcggtgctcaacgccgaaggctaccgccgcacgctggtactttcgcctccccacctg…	MPVDLDTTASNAAPVPGELLEAESSPLTLSLQDFVGEFGDELLDSLNRANPPVYTGQAQAQRQLVVASLKRKLFQAQADVVHAAAELLVDQGERAAIVNGEMGCGKTTVGIATAAVLNAEGYRRTLVLSPPHLVYKWRREIQETVAGAKVWVLNGPDTLVKLIKLREQLGVQPTGQEFFVLGRVRMRMGFHWKPVFTQRRTRHGDVAACPNCGTVITDLDGEPVNPISLEAEESRRKCSHCAAPLWTLIRPRSLSGSDQSSVVLKALKRIPTIGEVTAQKLMQKFGDGFLASMLGDNIHEFINLMDGNGELVFSDRQATRMERAMANMEFGFGEGGYQPSEFIKRYLPQGTFDLLIADEAHEYKNGGSAQGQAMGVLAAKARKTLLLTGTLMGGYGDDL…
KB-PA_3-chr1	1837861	1837550	-	CDS	FIG146805: Plasmid related protein	atggcagcccaagcactttccatcagccaaacaccgagcctgcgcttctcgccaggccaggtggtcatgacctgcggcgtcgatgacctggtccgacagggccggctcaacccgactccctacctgcgtcgccacctcggcggcgattggggcgacctcgacgacagcgacaggcggcagaacgatgccgcgctgaagtccggcgaggatcgtctgttttcttcttacgaggtcacacccggcctgaagatttggatcatcaccgaatgggatcgcagcgtcaccacgctgttgctgcccaacgagtactga	MAAQALSISQTPSLRFSPGQVVMTCGVDDLVRQGRLNPTPYLRRHLGGDWGDLDDSDRRQNDAALKSGEDRLFSSYEVTPGLKIWIITEWDRSVTTLLLPNEY
KB-PA_3-chr1	1839083	1837962	-	CDS	FIG023873: Plasmid related protein	atggctctcatgttcccgcggctcgcccgcaatttcgtgaaaaacgggtacttcccgaccgacgaacccacgctcgaaagagcgctcaacgcattgatgcccagtaactctgaatccaatgggccgatgtgcatcctcgatccctgcgccggcgaaggcgtggcaatcgctgaagcggctcatgccctggggcgcgagcatgccaaggcgttcgccgtcgagttcgacgcagagcgggcgcgccatgcccgtggtctggtcgatcactgtctgcacgcggacctgatggacacgatgatctccaagcagtccttcggtctgctctggctcaatccgccgtatggcgacctgtccaaggacgtcaacggcaacattggctatcaaggtcagggccgagcc…	MALMFPRLARNFVKNGYFPTDEPTLERALNALMPSNSESNGPMCILDPCAGEGVAIAEAAHALGREHAKAFAVEFDAERARHARGLVDHCLHADLMDTMISKQSFGLLWLNPPYGDLSKDVNGNIGYQGQGRARLEKLFYQRTLPLLQYGGVLVFIVPGYVLDAELVGWLTRHYTDLRIYRAVETQFKQVVIFGRRVRQREQTPDAVKAVRSLLLQIGLGEIEAEELPSEWPFLPYIVPASPAEPGHFFRVTMEPEQFADEVGRLQGLWPSRDTQLGAAQQTLRPPARALSHWHLALALAAGAISGVVQSKTGRVLVVKGDTHKDKTLQREFTEREDGSIAETRILTDKFVPVIRAWDMTPDSPTRGEVLTIR
KB-PA_3-chr1	1839798	1839148	-	CDS	FIG026997: Hypothetical protein	atgcccgcaaacccttcttccaccacgctgtatcgcatcgacgaatgcccggacgtgatggccgacgcttgcgtcggcgatgaccagggcaatctgatcttcctgtcgatctgggcgcgggacaccgccgtccagcagttccttgctcgcctgaccctcgggcgtgacgagcaaggcctggagcagttccacgtcatcaccgaccagggcggcagcgtcccggtgttcgtcggcaacgtcgatcgcctggaaaagcgcatgacccgcgcctaccggcgaacgctgttcggttcgctgtccaacgtgtggctgttcgatcggcgctgcgtcaagcccgacaaggccaacgccagcgcactggcattgctgccccgcgatagcgaccaccggcttgaccgc…	MPANPSSTTLYRIDECPDVMADACVGDDQGNLIFLSIWARDTAVQQFLARLTLGRDEQGLEQFHVITDQGGSVPVFVGNVDRLEKRMTRAYRRTLFGSLSNVWLFDRRCVKPDKANASALALLPRDSDHRLDRLWTLVQDTCPLPLLDHWRETVLELLQSREMLTRLPFALGPLVGHRLAIDVPALTQALGSLIRSDVLTAYPYPAKIWTPETVAA
KB-PA_3-chr1	1840282	1839881	-	CDS	FIG046709: Hypothetical protein	atgggctggtatttctccccccaatcgcggtctgaactgatcgcggaactgatcacaccgcaagagaccgagcgcaccagcgtgaaggtcatcgcccacgcactgcgtggcaacgtcctctggtctgttacgcaagtgacggccaaagccgacggcgtacatcgtgatctcgcgccaggtcagtccctgcgctatatccgctgcgatctgctgcaacgcagcggcggccagtggggctacaagccgctggacgaatccatgcacccgtactactactcgtgcccgctgtcctatctggatctcgcaccggagcaatccgccgactggcgtgcaggcgttcgcgcctaccacgcgcagaggcgcatacccaaagcagccccggctacgacgctgacggcc…	MGWYFSPQSRSELIAELITPQETERTSVKVIAHALRGNVLWSVTQVTAKADGVHRDLAPGQSLRYIRCDLLQRSGGQWGYKPLDESMHPYYYSCPLSYLDLAPEQSADWRAGVRAYHAQRRIPKAAPATTLTA
KB-PA_3-chr1	1841075	1840377	-	CDS	FIG034376: Hypothetical protein	atggcagccacatcggcatccgataaatcggtttcgcccattgtcgtccccggccaactcacgctgcgcaccattcgcggcaagaacggccccttcaccgtcggtcgcctcgccacgcacctcggtacgttcgaggtcaaggacccggagctggagcaataccccgaaggcaagtacgacggggagttcatcatcaggtacatcttcccgaagtcctacccggtcggtggtggcatgcgtttcgaaatccgcgccagtctggacggaatgacgctctacgacatcgacaaactgagccgtgacgaggcacgcagcttcgccactcaggacctcgatccacttgatgaagagctgggcgaacagcctgcggtaacgccggccaaaccagccaaaccagcc…	MAATSASDKSVSPIVVPGQLTLRTIRGKNGPFTVGRLATHLGTFEVKDPELEQYPEGKYDGEFIIRYIFPKSYPVGGGMRFEIRASLDGMTLYDIDKLSRDEARSFATQDLDPLDEELGEQPAVTPAKPAKPAKTSRPAKPAPVQASADPLVDTTPFGVDAPTPATATASGSTEEGDAALFGLLWPLDESVKLDSTIDRRTLRAQIARLSELGYALDFKTQEWSRQAELQPA
KB-PA_3-chr1	1842044	1841130	-	CDS	FIG049434: Periplasmic protein TonB, links inner and outer membranes	atgagcaccacgtccaacgagaaatcgtatttcgacctccacacctcgggcatcggttacatccagcgtgtccgtgaagtgcctgttcggggcggccgccgtgcgcagccttttctggcatgcaccatcgccgcgctggtcggttccgcaaaggaccccagctatcgctatttcgatgtcaaggtctcgggtgccgaggccaagaagctggtcgagcgctgcatcggcgttgacgatcccaagcagcgcccgctggtgcgctttcgcctcggcgacctgtggggcgatgcgtacatccgcgacaagggcgagcagaaaggccaagccgccgcgtccctcaaggcgcgactgctcaaggccgagccacttgaccgagccgaactggcttcgatcaggcat…	MSTTSNEKSYFDLHTSGIGYIQRVREVPVRGGRRAQPFLACTIAALVGSAKDPSYRYFDVKVSGAEAKKLVERCIGVDDPKQRPLVRFRLGDLWGDAYIRDKGEQKGQAAASLKARLLKAEPLDRAELASIRHHELITRGIGYLSRPKDVTPKDGDPFLSCTVAALAGPVDEPEYRYFDTIVTTPEAEHLVRRCVQAIEGDCKVLIAFRLNDMKIDPYIRTKGERAGEPAASLESTLIHIGLIKIDGTKVYPTSPAQAETPPAQDASASEAEDAGPAADQPAEPAEREPEGEVEKQEPALADSF
KB-PA_3-chr1	1843233	1842421	-	CDS	FIG076676: Hypothetical protein	atggatcgctctctcatcaagaccctgatgccttcgctggtcgcaggccatgtgccgcgcaacgtgcgatcgttcaagtaccgcgtgttcgatgatcaaccacagtcctcgacactgggcttcgtcattgatccccagcccttcgacggcaaggtggtagcagccagcaaagacgccatcgtcgtcaagctcaagcccagcgagttcgcggtactcgatcccaacctggtgaccaccgttcccagcgagggcaccaaggtgcatgtccaaccctatgcccgtcgccgtttcgacggcctgcgtgcggacacgccagaagagcgcaccgagatgatgtccgacggcactccctacaccgtcaagacacacatcctcggctccgcgccggccaagctgccc…	MDRSLIKTLMPSLVAGHVPRNVRSFKYRVFDDQPQSSTLGFVIDPQPFDGKVVAASKDAIVVKLKPSEFAVLDPNLVTTVPSEGTKVHVQPYARRRFDGLRADTPEERTEMMSDGTPYTVKTHILGSAPAKLPIPEPQCMELGQLIEQLEEMPAPDRFRRITHMLVDAGAHDFTWVDPKPSRIIETPPAISFTVSTAKFAGQVTILYQRGSDTYAVELRRDGELVDRHDEVYFDMLGEVLERLIDDGRWRLIDVSVIGAETSRRRRAVPA
KB-PA_3-chr1	1843791	1843513	-	CDS	hypothetical protein	atgttccccgacctcatctcgcccgcacgcgacttcgagcatcagcttggagcctgcgtcaacgccatgggccaggacgacgccatcggccagatcctggtattcgagcgcttgagtggcacgctgcacatgcgccatatcgccagcgccgatctggccgacaccgacattgacgactacgaaatggtcgttttcgacggtggcaacaccggcggcgacacgtggaagcacgtgttctttccacgtcagcgcgaacactacttcgtgtaccaagcctga	MFPDLISPARDFEHQLGACVNAMGQDDAIGQILVFERLSGTLHMRHIASADLADTDIDDYEMVVFDGGNTGGDTWKHVFFPRQREHYFVYQA
KB-PA_3-chr1	1844623	1843886	-	CDS	hypothetical protein	atgtctcagaatcccaatccctttgttcgcggctactggaacttgaaaatcgtccgcacgctgtccatcagctacgaggacggaagcccgcatgtctggcgaaatatccacccgagccagcaacatctttccgaccaggaactgatttcatcttcctgcatcgtcaccagcgatttcgcggtggtcacgaacggctctgaacctataagcgccgaggtgctggccgaatgcgatgccgatgagggcgttaacggcgaaggcgtgatcggtgccgtggtctatgccattcatggcgaggacttcgacgatcgcctgatccacgtcggtgacagctattcggtcgaggccgcgcgggaaatcgtgcagcgcctgagtttcgagaccggctactacagccgc…	MSQNPNPFVRGYWNLKIVRTLSISYEDGSPHVWRNIHPSQQHLSDQELISSSCIVTSDFAVVTNGSEPISAEVLAECDADEGVNGEGVIGAVVYAIHGEDFDDRLIHVGDSYSVEAAREIVQRLSFETGYYSRCWEISSAHISQETGQYLANLADLATPEAFLFIAFRVPYSPAIGVKLISTPWTDQNLEHADGITAEQLRQEHRSKGMPDDLANILELAGQADVRILILDADAPVLPGLPLAES
KB-PA_3-chr1	1845228	1844836	-	CDS	hypothetical protein	atgaatcaactgctgccgcaggaagtcgtcgatcagatcatgcgggaagagcagcatttcgctgccgcgccccaagccttcttcgaggcatggaagcgtggtgccgagatcgctggccccgaatggttcggcgacggcacccgtgaaggtctgaaccaggccaagagcaagtgggatctgcgtcccaacatgctgctgctcaatgatgccctcggcgtcctgagcagcggcgaacgcatgttcctgtccgccatggtcagcttctacaacgcgcgcgagggcggtgccatgctcaagcgctgccacttcgacgggctgtcggacttcgacggcctcgatctgcaacgccgcaaggtcatcgccgacttgatggtgaactacagcggctggtga	MNQLLPQEVVDQIMREEQHFAAAPQAFFEAWKRGAEIAGPEWFGDGTREGLNQAKSKWDLRPNMLLLNDALGVLSSGERMFLSAMVSFYNAREGGAMLKRCHFDGLSDFDGLDLQRRKVIADLMVNYSGW
KB-PA_3-chr1	1845462	1845250	-	CDS	hypothetical protein	atgtcccacaaagcctctttcggccagttggccttgacctattgcggcaagttcctgccgctcgaagtcctgcaaagcgccgccggccactacatcggcacgcgcgataccgaaggtcccgtttcgcgggaatcgcacgagtacttccgcagccatgcggcggctcaacgtgccctcgaaagaggcggctggtcccagctcgccattccctga	MSHKASFGQLALTYCGKFLPLEVLQSAAGHYIGTRDTEGPVSRESHEYFRSHAAAQRALERGGWSQLAIP
KB-PA_3-chr1	1846036	1845791	-	CDS	hypothetical protein	atgcaacaaccggagaaagtacgagccgcgttcgagcgcgaccttggcaacaaggtgctgttcatcaaggacggcaagctgctgtttatcgatggcatcaacctcaaggccatcgccgaccgtaaggcgtatttcgcttcgctgcgtgcgcggcaaacgcaacccattgtggtcctggccgaactgggacaggacgaggcattcgccctgtggaagcagtatgtcctgggcgacaagaccgagtga	MQQPEKVRAAFERDLGNKVLFIKDGKLLFIDGINLKAIADRKAYFASLRARQTQPIVVLAELGQDEAFALWKQYVLGDKTE
KB-PA_3-chr1	1848585	1846561	-	CDS	DNA topoisomerase III (EC 5.99.1.2) in PFGI-1-like cluster	atgcggctgttcttgtgcgagaagccctcccagggcaaggatattggtcggattctcggcgcgacacagcgcggtgaaggctgcctcaacggctccggcgtcacgattacctggtgcatcggccatctcgtagaagcggcagcacccgaggtctatgacgcggcgctcaagcgctggtcgctggagcagttgcccatcattccccagcagtggcgggtcgaggtcaaacccaagaccgccacgcaattcaaggtcgtcaaggcgcttctggcgaaggcgacccatctcgtcatcgccaccgatgccgaccgcgagggcgagctgatcgcccgcgagatcatcgacctgtgcggctaccgtggccccatcgagcgcttgtggctgtcggcgctcaacgat…	MRLFLCEKPSQGKDIGRILGATQRGEGCLNGSGVTITWCIGHLVEAAAPEVYDAALKRWSLEQLPIIPQQWRVEVKPKTATQFKVVKALLAKATHLVIATDADREGELIAREIIDLCGYRGPIERLWLSALNDASIRTALGKLRPSSDTLPMYYSALARSRADWLVGMNLSRLFTLLGRQAGYDGVLSVGRVQTPTLKLVVDRDREIAAFKSAPFWAIDVSLSTEGQAFSAQWVAPDGCTDDAGRCLQQPVAQQAAQQIRAAGSAQVVSVETERVREGPPLLFDLGTLQEVCSRQLGLDVQETLQIAQALYETHKATTYPRSDSGYLPESMFAEVPTVLDSLLKTDPSLRPIMGQLDRTQRSRAWNDGKVTAHHGIIPTLEPANLSVMSEKERAVYRLI…
KB-PA_3-chr1	1849295	1848855	-	CDS	Single-stranded DNA-binding protein in PFGI-1-like cluster	atgagcacgcacttttggggcgaaggcaacattggctccccgcccgaataccgggagttccccaacggcaacgacgagccgcggcgcttgctgcggctgaacgtgtatttcgacaaccccgttcccaccaaaggcggcgacttcgaggatcgcggcggcttctgggcgcccgtggaaatctggcaccgcgacgccgcgcactggaaaagcctctaccagaaaggcatgcgcatcctggtcgtcggccgcatggagcgcgagccctggacggacaacgaagatcagccgcgcgaaacctggcagatcaacgcgcgcagcgtcggcatcctgccgtttcgcatcgagtccgtgaccctcagcccgaagccgcaggatgcggaggcaaagccccaggccgcc…	MSTHFWGEGNIGSPPEYREFPNGNDEPRRLLRLNVYFDNPVPTKGGDFEDRGGFWAPVEIWHRDAAHWKSLYQKGMRILVVGRMEREPWTDNEDQPRETWQINARSVGILPFRIESVTLSPKPQDAEAKPQAAQEPAAPKEPRRRK
KB-PA_3-chr1	1849896	1849369	-	CDS	Integrase regulator R	atgagcgatccgaaccgcgaaccccgctacttccagggcctgcaacaggctgccttcgtgaagctggaacacgcggcctctctaaaaggccttttaaagccttttaagggtaagggggatcttgaggcctgggccagccagtgcttcgccatgcgcgacgagttgattggcttggctcagcggcaggtgctgcaacaggcagtcgggcatcccttccacctgctgcccgtggagttggcccaacaaaccactggcgcaggaacggcgtttttgcgctggcgcaagcacgaccgctcagccatgggcgtagccctgtggcaggaattgatggcgagcaccggcacgccggtcaacttactggccgagctgcacgcgatcgagcttcagcgcatcacgctg…	MSDPNREPRYFQGLQQAAFVKLEHAASLKGLLKPFKGKGDLEAWASQCFAMRDELIGLAQRQVLQQAVGHPFHLLPVELAQQTTGAGTAFLRWRKHDRSAMGVALWQELMASTGTPVNLLAELHAIELQRITLNMQISLLHTLGRQAQECASKAAVAEDAYLRRLKSIPPGMRDR
KB-PA_3-chr1	1850678	1849893	-	CDS	FIG141694: hypothetical protein in PFGI-1-like cluster	atggcaaccaatgaatctctgcaactgaatctcggctccctgcgcagcgcgatgtcgctgacgcttcacacccaccacgcttcgcgcatctggcatggccgtgccgccgccgaggggcgaccgggcatcgtcggcctgaacggctacatcgcccaaatgaacaagatgcggcgcggttcggagcaggacgacccgtactcggattggtggatgctgcgcatcgaggtcaagctcgaccagaccaagaccacgctgcaagcgctgcgcgagcaggtggatcaggcgctggcaagcgtaccgccggcactcagcctgggcgagaacctcaacgtgcaacccgtcaagttgccgctgttcgtcaatgcgcagctcggctttgccgccgtctatctgctggcc…	MATNESLQLNLGSLRSAMSLTLHTHHASRIWHGRAAAEGRPGIVGLNGYIAQMNKMRRGSEQDDPYSDWWMLRIEVKLDQTKTTLQALREQVDQALASVPPALSLGENLNVQPVKLPLFVNAQLGFAAVYLLADYDDIARKLILAHHTALIDRSTLERWLNEGAHALRSLFSLAQQYRYSGCTRDDFVSKNAAARAALEKFGELPQDVLEGTHRSKFAPPIVRRGLQQRVESPAAAPAPNDEAATGAVPEVGVGEIKGEQA
KB-PA_3-chr1	1852240	1850996	-	CDS	FIG141751: hypothetical protein in PFGI-1-like cluster	atggccgtggacgacaccgcaccacgagccctacgccaaggccccatcgcactggcagaactgttcgatgctgcgctgaaagaccttgcgcccaagcccgcccccagcgcacctgcgtctacacctgcacagtcgcccacgcccacctccggcgatgctttcctgttcagtggcaaccggcacgagacggtgccacgcaagttgttcctcgaccgccgcctgacgccgctggaacgaaacgcctggcaagtgttccgactgatgctcaacgacgatggcgtgaccgcatttcccacctacgagcagttgcgcccctggctagcgtccatgccctgcgcaggccaggcctcgcatgaaaccgtggcacgggcgctgacactgatgcgcctgacccgctgg…	MAVDDTAPRALRQGPIALAELFDAALKDLAPKPAPSAPASTPAQSPTPTSGDAFLFSGNRHETVPRKLFLDRRLTPLERNAWQVFRLMLNDDGVTAFPTYEQLRPWLASMPCAGQASHETVARALTLMRLTRWLSLVRRRRDPKTGRILGNLYVLHDEPLTPFEAMQLDPDYLQLVSQALGHSAKAVQIVGLHTLKEIGEDPLLAGRTLPSRLQVMAERLANQNPTACESYPQEDAIHDSEEGAPSLLRNRERPATDSEAGLKPAPDVSLRNPKQARTVRSSCINEVRTTAQARALGDLQWPKRFAQLKAEQQAGAKVALQQVDPSLRQDVLDEWAARCSNPGIRNPAGYLFGIIQRAIHGEFNAWAKKDPPPAPTQPNERPPPAPPTQTQGKPVPPEV…
KB-PA_3-chr1	1852804	1852244	-	CDS	FIG004780: hypothetical protein in PFGI-1-like cluster	atgtccacagcacacccgctcaaccaggctgtcatcgcccaggccctctatgacctgcgcaatgggcaactgcgccgctgcaaactgatggggtttggcgaggcagagctggacgccctcaagcatcctgcgctgatcagcgtgctggccaacgccaacgtctcctggtgctcagtgacggtcaaccgcgaagtgctgcggcggctgctccagcaggcgcaggacgtggagaaggaaatcgccacggtcgatcgcatgctcaggctgggcgcgagcacggagatggtcagcaagttctatggcttgacgcatcaggaagtagcgcttcgccgtgaaatcctcggtctgcccaagcgcaagggccggcaccccgtgctggacgaggagcaggacacggag…	MSTAHPLNQAVIAQALYDLRNGQLRRCKLMGFGEAELDALKHPALISVLANANVSWCSVTVNREVLRRLLQQAQDVEKEIATVDRMLRLGASTEMVSKFYGLTHQEVALRREILGLPKRKGRHPVLDEEQDTELWRQWKAVTNSRTVDLEDDTSILDAAMDLAEGMSLPLSVVWASIKSWVDQGLA
KB-PA_3-chr1	1854448	1852820	-	CDS	Protein with ParB-like nuclease domain in PFGI-1-like cluster	atgactgagatcacttcccagcagatggccggcaaactgcttgcgtccgggttcgagcgcagcggcccgtcagcaacgaccttgagcgacccgatcgccgacacgcccatggtcgtgacgctcgaccaattgcgcccctacgaccacgacccgcgcaagaagcgcaatccggtgtacgaggaaatcaaggcatccatccgcgagcgtggtctggacgcggctccggccatcacccggcggcccggcgacgatcactacatcatccgtaatggcggcaacacgcgactggcaatcctgcgcgaactctggtcggagaccaaggacgaacgattttttcgggtctcatgcctgttccgcccgtggcccgagcgtggcgagatcgtcgcgctcaccgggcat…	MTEITSQQMAGKLLASGFERSGPSATTLSDPIADTPMVVTLDQLRPYDHDPRKKRNPVYEEIKASIRERGLDAAPAITRRPGDDHYIIRNGGNTRLAILRELWSETKDERFFRVSCLFRPWPERGEIVALTGHLAENELRGGLTFIERALGVEKAREFYELESGSTLSQSELARRLAADGYPVQQSHISRMADAVRYLLPAIPTVLYAGLGRHQVERLSVMRKACERTWAHYAKGRSLVQDFDEFFQEVLSQFDVQADEFSAQRIQDELIGQMTELLGVDYDVLALDMTESESRQRALVSEPTPPSTPPALPEPEAIARPPADTAPPAARPTATPSTGESDAEASHSDAVSPATDGDRLQEHIVSPAPTTERLESIQRMVADQLGDALPHDFSANVLQS…
KB-PA_3-chr1	1854689	1854441	-	CDS	FIG034647: hypothetical protein in PFGI-1-like cluster	atggccaacgcacatgaactggcccgaggtcacagccggctgcgcgccctgatcgagttcgccgtgggcgaaggctggcacgtcaagcgcacggcgggcggtcacctcaagttcaccaagtcaggctgcgccgcgatctacaccagttcgacggccagcgatcaccgggcagccctcaacgcccgtgcgcagatccgtcgcgccgagcgcgagacccgatcccaagcgcaggggggcggccatgactga	MANAHELARGHSRLRALIEFAVGEGWHVKRTAGGHLKFTKSGCAAIYTSSTASDHRAALNARAQIRRAERETRSQAQGGGHD
KB-PA_3-chr1	1855548	1854673	-	CDS	Chromosome partitioning ATPase in PFGI-1-like cluster, ParA-like	atgcaggtcgtatccatcatttcaaccaaaggtggggtcggcaagactaccaccgctgcgaacctcggcggtctcgctgcggacgccggactgcgcgtgctgctgctcgacctcgatgtgcagcccaccttgtcctcatactatgagctggctcaccgcgcgccgggcggtatctatgaattgctggccttcaacgagcgcgacctcgaccagcttgtgtcccgcacgatcatcgcgggcctggacttggtgctctccaacgaccaccgaggcgaactgaacactttgctgctgcacgcgccggacgggcgcttgcggctgcggcatctgcttccggcgctcaatcccctctacgacctggtgctgatcgacacccagggcgcgcgctcggtgctgctg…	MQVVSIISTKGGVGKTTTAANLGGLAADAGLRVLLLDLDVQPTLSSYYELAHRAPGGIYELLAFNERDLDQLVSRTIIAGLDLVLSNDHRGELNTLLLHAPDGRLRLRHLLPALNPLYDLVLIDTQGARSVLLEMAVLASDLALSPVTPEILAARELRRGTMQLLEDIAPYRQLGIAPPPLHLLINRVHPVSANARLIQQALRDLFQDHADIRVLATDVPAIEAYPRAATRGLPVHRVEYRQPVGRVAPAALATMRDLAGELLPQWQDRFAAVSGRPPQPLDTRRPHGQRT
KB-PA_3-chr1	1855803	1855591	-	CDS	Transcriptional regulator in PFGI-1-like cluster	atgtcgcaaacatctgtactgcagccaaacgagcgccgcatcctgcgcttggaagaagtcgaagcgaaatcaggtttcaagcgcgcccacatctacaacctgatgaagaaacgccagttcccgcaggccctgcgtctgggcgtgcgcgccgtgggctgggactccatcgaaatcgatcagtggatcgacgagcgcgtcaacaaccgggcctga	MSQTSVLQPNERRILRLEEVEAKSGFKRAHIYNLMKKRQFPQALRLGVRAVGWDSIEIDQWIDERVNNRA
KB-PA_3-chr1	1856677	1855922	-	CDS	FIG041388: hypothetical protein in PFGI-1-like cluster	atgcacgagaacaaaaatgatgcaccaacatcaaaggtgttctaccgcccgctcgaagcgtccatccgctgggccggactgctgcgatacgagcaggtgattctggcttcggtctcgtcgccgatgaatctgccgcagtcgctggactgcccacgtttgggcgaactgcggctgtacaccgaccgcatctatgacggcatcctcaacggggaactgcccttcgggcagcacggcatcacgacgcgcgacaccacgttgatcgaatcgcctgatctgacggtgcgccatgtcgatctgaagtgctggatgcgccagcactaccccgagcagcggcccggctttctcttctcccgcagcgagcgcatcacccatcccttcatctctctggaaacagggcaa…	MHENKNDAPTSKVFYRPLEASIRWAGLLRYEQVILASVSSPMNLPQSLDCPRLGELRLYTDRIYDGILNGELPFGQHGITTRDTTLIESPDLTVRHVDLKCWMRQHYPEQRPGFLFSRSERITHPFISLETGQAMLVERQALKSVLEQTKRQLRELQDKHDALLKQPTVIPACAQCPISDRAEATYLNIVGGLLELMLGQSPSGTPYSSFKTQEAVVSALVAHHSGAMGIAERTLNGKFATARRRLRSASR
KB-PA_3-chr1	1859157	1857229	-	CDS	IS, phage, Tn; Transposon-related functions	atgctttcagacctccaggttcgacaggccaaggtgaccggcaaggcgtattcgcttgtcgatttcgacggtctctacttccatatctcagccaccggcttcaaggcctggcacttccgcttcacttggggcggcaagcgcgagcgcatgtccttcggcggctatcccgcgctttccctgaaagatgcccgtcatctgcgcgacgaggcccgggccatgctggccaaggacatcaacccgcattcggaacgcaagcgcaaacgccacgtgattgtcctggcgggcgagcacaccttccaggccatctacgacaaatggctggcccaccgcagcctctctctggaaaatgagggccgccagagcacgcccaaacagatcgggcgcgtcttcgccaaggat…	MLSDLQVRQAKVTGKAYSLVDFDGLYFHISATGFKAWHFRFTWGGKRERMSFGGYPALSLKDARHLRDEARAMLAKDINPHSERKRKRHVIVLAGEHTFQAIYDKWLAHRSLSLENEGRQSTPKQIGRVFAKDVFPVLRHLTVYDVTRAHLLDIIGRVEKRGSLSVAEKLRTWFSQLFTYASVVVPNMGDNPAKDLDVVAMPLPPVENNPFLRMPELPAMLQTLRKYSGRLNTQLGLRLLLLTGVRTGELRYATPDQFDLERGLWIIPVVRLKQRKQLTKKKRQRFADIPPYIVPLSLQAQEVVRHLLGNLKPAQVYLIPGDWCLKKPLSENTLNGALKRMGYEDQLTGHGVRATVSTALNELGYPPKWVDAQLSHADPDRISATYNHAEYVEQRRVMM…
KB-PA_3-chr1	1859311	1859433	+	CDS	hypothetical protein	gtggatcgatattgggtgaaaatcctcaatcctgacaatgacttacgacgttccctggcgttcggcggaagaccctggaaagtcgaagtggagcgggtgaagggaatcgaaccctcgtcatga	MDRYWVKILNPDNDLRRSLAFGGRPWKVEVERVKGIEPSS
KB-PA_3-chr1	1859610	1860812	+	CDS	hypothetical protein	gtgctcaccgagagacagatccgcgcactcaagccagccgagaaggaatacaccgtcagcgacgggcgcagcgcgcggggtgagggtgtcttgatgcttcgggtgcggcccaatggtacgaaggagttctacttccagcgccggaagaacgggcgaaagctgaagaccaagctgggcacctggccgacgatggcgctcacggaagcgcgggaccggtgtcgcgaggagaaggaaatccagatcgaggctggcaccttcaaggagttgatggccgcctatgttgccaagctgaagcaggaaggggcggccagtgccgagcacgtcgagtggtcgtttagacactacgtttccgagccgttccccaccctggtggagcgcccggcggtgttgatcgggccg…	MLTERQIRALKPAEKEYTVSDGRSARGEGVLMLRVRPNGTKEFYFQRRKNGRKLKTKLGTWPTMALTEARDRCREEKEIQIEAGTFKELMAAYVAKLKQEGAASAEHVEWSFRHYVSEPFPTLVERPAVLIGPADIRDILAKMIAGGVTTMTNRVRSRLHSAFQSALQQDYNPRTYLEQENRFGLTSNPVASIPVQEDWEQPGDRALTENELQALWHLLPEKLSLTTSELLKFLIASGGQRPEQLLRSDRTMYQRDHVMIRNGKGGEGERAMHVVPYNKLMRASLKEMDCISEKSAYPFQGKEEGKSLNPQSLSRAVTKLYGRHHKSFNGPFTLRDIRRTCKTLMAKAGLTKELRDRIQGHAFNDVSSKHYDRYDYFQEKKRGLDRWAAWLEKNVIDTKK
KB-PA_3-chr1	1861001	1860819	-	CDS	possible exicisionase	atgcgggaggccgaagtgctggaagccaccagcctggcgcgctcgacactctggcgggaggtgaaggccaagcgcttccccagtccggtacagatcacgccagggcgagtaggctggagacaatccgatatcaaccgctggctggaaaacccgatgggatggacaccaacaagggccgcgtga	MREAEVLEATSLARSTLWREVKAKRFPSPVQITPGRVGWRQSDINRWLENPMGWTPTRAA
KB-PA_3-chr1	1861218	1861015	-	CDS	hypothetical protein	atgactgatcgggccaaccgccagcacctgctggtatgcgaagcccggtactggctccggcgtggtatcaccacgccggataaagtcgccgagctgagagaaacccttaagcggcggggggaaagcgccgtcgagcagttgatagcggaaatgcgccgacagtggcaggcgcggacagagtggctaggtggtgaagatggctga	MTDRANRQHLLVCEARYWLRRGITTPDKVAELRETLKRRGESAVEQLIAEMRRQWQARTEWLGGEDG
KB-PA_3-chr1	1861583	1861215	-	CDS	hypothetical protein	gtgaaagcactgagcattcgccaaccatgggcctggctggtcgccaatggccacaaggacatcgagaaccgcgactgggcgaccaacttccgcggccgctttctgatccacgcagccaagggcatgacacgcgacgagtacgaggaggcccgcgacttcgccgcgtacaacggcgtgaccatcccagcgccgcacgaactggagcgcggcgggatagtcggcgaggccagcatcatcggctgcgtcgatcgctgcaactcactgtggttcttcggccgatacgggttcgaactggctgacgccaagccactgccgttccagcccatgaagggccagctggggttcttcgaagttgaggtagtgcaatga	MKALSIRQPWAWLVANGHKDIENRDWATNFRGRFLIHAAKGMTRDEYEEARDFAAYNGVTIPAPHELERGGIVGEASIIGCVDRCNSLWFFGRYGFELADAKPLPFQPMKGQLGFFEVEVVQ
KB-PA_3-chr1	1861756	1861580	-	CDS	hypothetical protein	atgcacgacttacttaaaatgctggacaacccgcgcaacttgctgaacttctcgctggcagttctggttgtcctggctgtgttcttcatgttgaagagcggcgcgcaatctgcttcgcaaccagccccctccctttccacgtccatggaagcacactcaagggggaagcaaccgtga	MHDLLKMLDNPRNLLNFSLAVLVVLAVFFMLKSGAQSASQPAPSLSTSMEAHSRGKQP
KB-PA_3-chr1	1862999	1861767	-	CDS	hypothetical protein	atgaaagccctttccccgcgccagagtgacatcttcgccgccggcgcccagcgcctgcagatgaccgagagcatcgagctgaccatccagagcatgcaggcctatggcgccgatcatgagcactggggagtggcctggtcgggtggcaaggactccagcgccaccctgacgctgcttatctggctgatcgacaccggccggatcaaggccccgaagtcgctcaccgtgttctacgcggacacccgccaagagctgccgccgctggccatcgcggcgcaccagatcatggacgagttgcgggaccgcggcatccgcgtcgaggtggtatgcgcaccgctcgacaagcgcttcatggtctacatcctgggccgcggcgtgcccccgccgaacaacaacacc…	MKALSPRQSDIFAAGAQRLQMTESIELTIQSMQAYGADHEHWGVAWSGGKDSSATLTLLIWLIDTGRIKAPKSLTVFYADTRQELPPLAIAAHQIMDELRDRGIRVEVVCAPLDKRFMVYILGRGVPPPNNNTLRWCTRQIKIDPMQAALEQRLAALDGNVLMITGVRQGESAIRDKRIEMSCGKDGAECGQGWYQKVLPEAKGLKGRLATLAPLLHWRVCHVWEWLKHWAPLAEFGDWSTAMIADAYGGDEAEEINARTGCTGCPLASEEKALETVLAMPHWAYLAPLRGLKELWRELREPQHRLRKAGIERLKDGSIAANPQRTGPILLESRLMGLERVLAIQAECNAAADHLGRPRIDLINAEEEARIRELIAASTWPDGWDGDEPIATIPLDKIF…
KB-PA_3-chr1	1864906	1862996	-	CDS	Phage protein	atgcttaagcgtaccctctaccacttccacttttgctgcggcctgggcggcggcgccgctggcttcaaccgggcgcgtccgcgagtcggcaacgtcgaggccgaatgggtctgcctcggcggaatcgacgtggacccggccggattgcgcgatttcgagcgcttggccggcgtcccgggcaccctgctggacctgttcacccgcgaccagtacgtgcggttccacggcaaggagccgccggcaggctggcgggaggcgaccccggaggatgttcgtcgcgccgcgggcgggcgccgaccggacaccgtgttcattagctcgccctgcaagggtgccagcggcctgctgtcggagaagatgagcttgactccgaagtaccaggcgctgaacgagttgacg…	MLKRTLYHFHFCCGLGGGAAGFNRARPRVGNVEAEWVCLGGIDVDPAGLRDFERLAGVPGTLLDLFTRDQYVRFHGKEPPAGWREATPEDVRRAAGGRRPDTVFISSPCKGASGLLSEKMSLTPKYQALNELTLRCIWLMGEAWADDPVPLIVFENVPRLASRGRHLLDQINSLLGGFGYAVAETTHDCGELGGLAQSRKRFLLVARHVEKVPPFLYEPEKKSLRAVGDILGRMLLPGDIEAAGPMHRVPSLQWKTWVRLALVRAGSDWRSLNDLAVEDGYLRDLIIVPEYQAGYMGVHGWNDSMGTIAGRSGPTNGAFSVADPRAPANALQYQQYGVRRWTDTSGAIIGVKSPGQGTYSVADPRGQSFGKYPVTDWDGPSGTVIAASTTGQGAFAVAD…
KB-PA_3-chr1	1865150	1864899	-	CDS	Phage protein	atgcaagcgaatcaaccccaaggcggcaacgccaaggctagcacagccacgtcagccacccgcactcgtccagcgatggccagcaagcggctggaccttccgagcacctgcgacatctgcggcaacgcgcgttccaccggcaagcaccagcgctgcagccggattcgccaacaggccaaggcggtcgagtgggccagctacatggccaacctggcggccaagaaagcgcagggagggcgtcggcatgcttaa	MQANQPQGGNAKASTATSATRTRPAMASKRLDLPSTCDICGNARSTGKHQRCSRIRQQAKAVEWASYMANLAAKKAQGGRRHA
KB-PA_3-chr1	1865416	1865210	-	CDS	TraR/DksA family transcriptional regulator	gtggatgtgatcgaccaggccaacgaacgggccgagaacatgatccaggccgccctggcccagcggacgaacactcgcccggcgcccagcgccctctggtgcgaggactgcggcgagcaaatacccgaggctcgccgccaggccgccccgggctgcgagtgctgcatcagctgtcaggaactgcgcgagcaccccgcgcggcgctga	MDVIDQANERAENMIQAALAQRTNTRPAPSALWCEDCGEQIPEARRQAAPGCECCISCQELREHPARR
KB-PA_3-chr1	1865781	1865428	-	CDS	Phage protein	atgcaacccctcccccacgactatctgcggttgatccacgacttccaggccaggcagcaggagaacgaggtagccggcatcacagcgttgaaacgcctgctcccgatcgcacagcgcgacagcggccagagcggcgtgatcggtcggttcctgctcggcctgtacaacggccaggctcaccgcttcgacctcaccgagctgcgcggcctcgacccagcgctgttcgatgcgtgcctgtccgtgctgcgcatggactatgccccgaaacaggaagtgcatgagtacttcgaggacggcgacgcgatctggcaggacctgcgcaaacgctgggccgcagcatcgctgccggcatag	MQPLPHDYLRLIHDFQARQQENEVAGITALKRLLPIAQRDSGQSGVIGRFLLGLYNGQAHRFDLTELRGLDPALFDACLSVLRMDYAPKQEVHEYFEDGDAIWQDLRKRWAAASLPA
KB-PA_3-chr1	1866115	1865843	-	CDS	hypothetical protein	atgcaactgaatgtatcccgcggcgcacccgctactggcaagacggtccgcctgcgccaaatcgcaaaggctgacggccaaagcgagaaccagattctggtgggtcgtcacatgacgacagcagcactgaaagacgcggtttggcacctctccaatcgcggcgcgacggtcatctgcatcgacgagtgcagcgaagagcagatcgcggctctggagcgctaccagcaccgcatgccggaccacctgaccatccatgccgttgtagcgaactga	MQLNVSRGAPATGKTVRLRQIAKADGQSENQILVGRHMTTAALKDAVWHLSNRGATVICIDECSEEQIAALERYQHRMPDHLTIHAVVAN
KB-PA_3-chr1	1868880	1866160	-	CDS	Phage protein	atgaaggaaatggaccgcgagctcaaggccgacgtgctgcgccgcctacaggatcagtacggcctgacgccgatcaagggcacgaagtacatgcgcaagggcgagtgcccgacgtgcggcaaaaaggagctctacaccctggtcgacagcccctggttcatccgctgcgggcgcggcaagtgcggcgacacctggcacatcaaggaaatctacccggagctcttcgacgactggagcaagcgagcgccggccaccgacaaggaacccgccgcctcggcccgggcgtacctggcccatgcccgcggcttcgacctggcgctgatcgatggctggtacagccaggaaaactactgggaccgcgaccttgagatcggtagcgcgacagtacgcttcccgctg…	MKEMDRELKADVLRRLQDQYGLTPIKGTKYMRKGECPTCGKKELYTLVDSPWFIRCGRGKCGDTWHIKEIYPELFDDWSKRAPATDKEPAASARAYLAHARGFDLALIDGWYSQENYWDRDLEIGSATVRFPLKKGGYWERLIDRPSRFGKKKARFKPGDSPRGVWWCPPSVDLQEVKELWIVEGIFDAIALLHHGIDAVSAMSSNAFPEQSLRELATARGGKLPKLIWALDNEPGAHRYTRRWVTEARALGYVCEAAQLPQRNNRKFDWNDLHQRWMFIDDAAERVAQIEKDLKTARHEGALLIAESAAEKALLMYDWGKRGEFHFRFANRLYWFKLDIEKFNKAMQSLEDSDNHDDQLLNQKQMRDKALQQAGSVVEIANCFPQALYFQRNEVTDES…
KB-PA_3-chr1	1869110	1868877	-	CDS	hypothetical protein	atgagcggccatatttcaatcaccgtcgaagtcgaccagaaccaggctgagaagtacctgctctggctggtcagccagtacgaagccgccatggccgagtgctggtacgacgatcgctaccgctatacgccgcaggggctgcgcggcaagcgcatcctcgaggaccgcccacacattgctggcatctgccggaccatccgcgaactgcgcaagcagattcgggggcgcgcatga	MSGHISITVEVDQNQAEKYLLWLVSQYEAAMAECWYDDRYRYTPQGLRGKRILEDRPHIAGICRTIRELRKQIRGRA
KB-PA_3-chr1	1869531	1869181	-	CDS	hypothetical protein	atgaacagcaccaacgactaccgcagcaccatgcagaaagccgccgcagcgtacctgcaggcccacgccaaccaatatctttcctccggctccgaccggttgttcgatgcctgtgtcaaccatctggccaaaggcctcgaggtcccccaattcatggccgaacaactcgcccagcgcgcgtgggatgaagtcttcgcggggccagagccgatctggctgggcatcgactggggccagggagacgacgaggtggtctacctgatcgacacccgcaatcactgccgcttcccgatcccggctcgctatctgcccgcgcacctgctcaaacagcgcccccagcacacccagtaa	MNSTNDYRSTMQKAAAAYLQAHANQYLSSGSDRLFDACVNHLAKGLEVPQFMAEQLAQRAWDEVFAGPEPIWLGIDWGQGDDEVVYLIDTRNHCRFPIPARYLPAHLLKQRPQHTQ
KB-PA_3-chr1	1869821	1869528	-	CDS	Phage protein	gtgagcgtctacaagctcgtctgcccctgctgccacagccggatgcggatccgttcctccgaaggccagactccgtgcttccgctcgatgtacgcgcaatgcactaacgcgctctgcggcgccaccttcaccggctcccttagctgggactaccagctcagcccctctggcctcgagcggccactactggtgctccccatggcgccatcgaagacccgtcaactggcacgccgcgacctcgcggccgcaaccaaccaactggacctgctggatcatgtggagtgcatgcaatga	MSVYKLVCPCCHSRMRIRSSEGQTPCFRSMYAQCTNALCGATFTGSLSWDYQLSPSGLERPLLVLPMAPSKTRQLARRDLAAATNQLDLLDHVECMQ
KB-PA_3-chr1	1870318	1869818	-	CDS	Phage protein	atgaccgccgccctggggagataccagaagatgaaacgcccgctcctagaaacgcggcgccaggtggtcagcgcgatcatcggcgcctaccccggcggacgcgaatgcgccgccgcccgcctgggcctcgacctgaagaagttcgacaaccacgcctacgagaacgccggcagcaaaccgctcagcgacgaccagttgctcctgctcgagcaggaaaccggcaccagccacttccccgagtatgtcgcccacctgtacggcggcatgtttgtgcagatgcccgacccggtccagttggacaacctcgacctgtacgcccgtggcgtcaccaccgccatcaggcgcggcgaggtcgaccgcatcatcgccgaggcgctgcgcgatggagagatcgacgag…	MTAALGRYQKMKRPLLETRRQVVSAIIGAYPGGRECAAARLGLDLKKFDNHAYENAGSKPLSDDQLLLLEQETGTSHFPEYVAHLYGGMFVQMPDPVQLDNLDLYARGVTTAIRRGEVDRIIAEALRDGEIDEAELAEIIVAHRQHLAARHAEVGAVITLHRRVKA
KB-PA_3-chr1	1870548	1870318	-	CDS	hypothetical protein	atgacccctaatcagatccgtgcacgtctcgtcgaaaagggcagcagctaccgaaagttcgcgctggctcgcggctacgagccgcgcaatgtcacccaagtggtggctcggtgggcaggagcggaacgtttgcccaacggtcgcctcgcctacgcgattctgaaggacctatctgaagagataggtgccgatgtcgtccccggcattcgccgacccgcaaccgaacagtaa	MTPNQIRARLVEKGSSYRKFALARGYEPRNVTQVVARWAGAERLPNGRLAYAILKDLSEEIGADVVPGIRRPATEQ
KB-PA_3-chr1	1870847	1871053	+	CDS	hypothetical protein	atgtggagaggggcagacccgcagaaggttgaggcaacgcctaccgatccccgcgagcaggctctgctggcactctggcgcgaactggacgagggtgagcagcgagaaatacagcttgctgctgaggaaaagaaacgtctgaagattctggagcagcgcctcgcggaactggaggccgttgtcgctgatgccaaaaggctggcatga	MWRGADPQKVEATPTDPREQALLALWRELDEGEQREIQLAAEEKKRLKILEQRLAELEAVVADAKRLA
KB-PA_3-chr1	1871626	1871766	+	CDS	hypothetical protein	atggccaccaagacggacatggctgaactcaaggcggccattgcctctgagttcggctctcagaccaagtggttcgttggtacggctgttgttcttgccggcattgcttttaccgccgcacgattcatacccggcgggtag	MATKTDMAELKAAIASEFGSQTKWFVGTAVVLAGIAFTAARFIPGG
KB-PA_3-chr1	1873283	1872009	-	CDS	hypothetical protein	atggccctgcatagcccgctcgattcgaagggccggtatctccactatgacaagcttcgattcagactccataaggaactggatcacaccattgcttggtcgctcgtaaaacaggctagaagaagccagttaaaagaggttatcaagttaggagagccagcgcagccaggtcacttgctcctgaccccaaacatacagcgggcaatttccgagtgcgacaggagaactactactgccgcattagagtggatgtgcaataaaattggcgaacagcagcacttagaatatctactaaatgacttagtagaagacgaagctattagtagcagtcagctagaaggggccgcaacaactacccaaatcgcgaaagatatgttaaagcggaagcgtcaaccccgg…	MALHSPLDSKGRYLHYDKLRFRLHKELDHTIAWSLVKQARRSQLKEVIKLGEPAQPGHLLLTPNIQRAISECDRRTTTAALEWMCNKIGEQQHLEYLLNDLVEDEAISSSQLEGAATTTQIAKDMLKRKRQPRTPSEKMILGNFKMMNFAWKNRNLPLSLDLIAELHSTGVEGIDDEKYRPGTFRQTDDVVVVDGEGNTVHIPPPADGLEERLQRLVDWVNTDHCHAKDDHYIHPLVKAIIIHFSIGFEHPFHDGNGRVARSLFYWLLFKHEFGAFRYIAISTLLKSAPAKYGKSYLYTETDNLDLTYFIDYQCDIISRAIDAYMDQYNKTLRDIEEFNAFLYKSGLYGELSDKQRTIFQVAKNGRATNFTAQNVRENLRCSYNTASTALNGLVEKGLF…
KB-PA_3-chr1	1874793	1873498	-	CDS	Phage tail formation protein GpD	gtgatcgatgccgccctcgcccgcgtaacgggctacctgaccagcgccgtcgaccagctgcagcgcgacgccggctacccggtgccggtgttccggctcacggtcgacggcaacgacatcgcccagctcatcagccctcggctgatcgccctggatctgaccgacaatcgcggcctcgaggccgatcagttgagcgtgacactcagcgatcatgacgggctgctcgcgatccccccgcgcggcgccgtgctgcacctctggctgggctggagtgacagcggactggtcgacaagggcacctacaccgtcgacgaaaccgagcacagcggcgcgccggacgtgctcagcatccgcgcccgctcagcggacctgcgcaagggcctgaaggtcaagcgcgag…	MIDAALARVTGYLTSAVDQLQRDAGYPVPVFRLTVDGNDIAQLISPRLIALDLTDNRGLEADQLSVTLSDHDGLLAIPPRGAVLHLWLGWSDSGLVDKGTYTVDETEHSGAPDVLSIRARSADLRKGLKVKRERSWSSPKTLGDVLTDIALGNNLKPVLAPALAGLPILQLDQANESDANLLTRLGEDFDAVATVKAGCLLCLPAGGGKTASGLALPHITLTRQDGDQHRYLQADRDSYDGVRAYFYDVNSAKKQEAIAGAKGDNLKDLRHTYSDRQSALRAARAKWNRLQRGSATLSYVLARGRADLIPELTYTLQGVKTEIDAIIWYGGNVQHSLSADGGYITSLELESKLPEDLVSDLADDTGGDYTGIIAYYRDEKSGTEKTITAGDQSKPRRLR…
KB-PA_3-chr1	1875230	1874790	-	CDS	Phage tail protein GpU	atgatgctgtccctcgggatgttcgtcttcagcctgcacacgctggcctatcaagagttccagcggcagaccgagtggcgacacgccagcagcagccgcatcggcgcccagccggcgcgccagttcgtcggccgcggcgacgacgcgatcaccctgcctggcgtgctgctgccggagctggccggcagcgcgttgagcctggacgtgctgcggcagatggctgacaccgggtcggcctggcccatggtcgagggcaccggacgcatctacggcctgtgggtgatcgagcgcgtcaccgagacgcggacactcttcttcgccgacggcaccccgcggcggatcgagttctccctcgagctcaagcgcatcgacgacggccgcaccgatctgctcggctcg…	MMLSLGMFVFSLHTLAYQEFQRQTEWRHASSSRIGAQPARQFVGRGDDAITLPGVLLPELAGSALSLDVLRQMADTGSAWPMVEGTGRIYGLWVIERVTETRTLFFADGTPRRIEFSLELKRIDDGRTDLLGSVLGTAGNLLRRIL
KB-PA_3-chr1	1877950	1875236	-	CDS	Phage tail length tape-measure protein GpT	atggcgaatgacctgcagctgcgcgtgctgctcagcgcgatcgacagagccaccgcgcccttgcgtcgcatcatgcaaggcagcgacgcgacggcccgggcgctcaaggcaactcgcgagcgcctgaagcagctcaacgctcagcagagcgacgtgcgcgccttccgcacccagcgcggcgccctggagcaggtcagcaccgcgctggccgggcaacaggcccgggtgaaagcgctggcccagcagatggccgccgccggcaaccccacccgcgcgctcacccgcgactacaaccgggccatccgtgaagccggtttcctcaagcagcagcacctgcagcacagccaagccctgcagcaactgcgcacgcgccttagcaacgccggcatcagcacccgc…	MANDLQLRVLLSAIDRATAPLRRIMQGSDATARALKATRERLKQLNAQQSDVRAFRTQRGALEQVSTALAGQQARVKALAQQMAAAGNPTRALTRDYNRAIREAGFLKQQHLQHSQALQQLRTRLSNAGISTRNLGQHERDLRAQIQAANGAINSQAQRLRNLSQQQERLTHARNTYSRGIQSAAALAGTGMAARATGMYTGDKLRQMLGVGYEFDATMSATQAVTRIERKDDPQMQALRQQARTLPLSSKFTDKEVAEGQYFLGRTGYNAKQILGAMPGMLNLAAAGDMDLGTSADIASNIQTAMGIPAEKMDHVADVLTAAFTRNNVDIRMLGDSLKYSAGVGREYGQSLETVTAATALLGNAGVQGSQAGTSMRSVLTRLGLSKAVAQLGVKTQDA…
KB-PA_3-chr1	1878059	1877940	-	CDS	Phage P2 GpE family protein	atggccgacctggccgtgacgttccactgggcgccggaccatatggaccggctctcgctcaccgaactgatggaatggcgcgaacgcgcccgggtacggagttccgccgatggcgaatga	MADLAVTFHWAPDHMDRLSLTELMEWRERARVRSSADGE
KB-PA_3-chr1	1878397	1878068	-	CDS	Phage tail protein GpE	atgaaaaccgaacagtctcccgctgacctgcagaacgctcccgacaacgtcgtccccctcgaccagccgatcaagcgcggcgcccagtccatcgaatcgctcaccctgcgcaagccctcatctggcgaactgcgcggcctgcacctgctcgacctgctgcagttcgatgtggccgcgaccatcaaaatcctgccgcgcatcagccagccgaccatcaccgagcccgaggccaccggcatggacccggccgacctgctcgcctgcggccaggtgatcgccggttttttgctgcagaagcgggcgaaagcggcagcctccctgatcgcgtag	MKTEQSPADLQNAPDNVVPLDQPIKRGAQSIESLTLRKPSSGELRGLHLLDLLQFDVAATIKILPRISQPTITEPEATGMDPADLLACGQVIAGFLLQKRAKAAASLIA
KB-PA_3-chr1	1878967	1878452	-	CDS	Phage major tail tube protein GpFII	atggccatgccgcgcaagctcaagaacatgaacctcttcaacgacggcggtagctaccagggcgtcgtgaagtcctgcaccctacccccgctggcccgcaagatggaggccttccgcgggggcggcatgaacggcccggtcaaggccgacctaggcttcgacgatgacggcatccagttcgagtggaccctcggcggcctggatctgacagccctcaagcagtacggcgcagtcagtgccagcggcgtcatgctgcgcttcgccggctcattccagcaagacgataccggcgaagtcacgcccgtcgaaatcgtcgttcgtggccggcacgagaccatcgaaatgggtgacgcccagcccggcgaagacaccgagcacaagatcaccaccacctgcagc…	MAMPRKLKNMNLFNDGGSYQGVVKSCTLPPLARKMEAFRGGGMNGPVKADLGFDDDGIQFEWTLGGLDLTALKQYGAVSASGVMLRFAGSFQQDDTGEVTPVEIVVRGRHETIEMGDAQPGEDTEHKITTTCSYYKLVVNGEEVIEIDLLNFVEKVNGKDLLEAQRKAIGL
KB-PA_3-chr1	1880199	1879024	-	CDS	Phage tail sheath monomer GpFI	atggccgctgaccaatatcatcacggtgtccgggtccaagagatcaacgacgggacccgccccattcgcaccatcgccaccgcgatcatcggcctggtagccaccgccgacgacgccgacgccaccgccttcccgctcgatacgccggtactcatcaccaacgttcaggccgccatcggtaaggctggcactagcggtacgctggccgccagcctgcaggcgatcgccgaccagtccaacgccgccactgtggtggtgcgggtgaagccgggcgaagatgaagcaacgaccaacagcgccgtcatcggtggcgtcagcaccgaaggcaagtacaccggcatgaaggccttgcttgccgccaaggcccgcttgggcgtggtgccgcgtatcctcggcgcg…	MAADQYHHGVRVQEINDGTRPIRTIATAIIGLVATADDADATAFPLDTPVLITNVQAAIGKAGTSGTLAASLQAIADQSNAATVVVRVKPGEDEATTNSAVIGGVSTEGKYTGMKALLAAKARLGVVPRILGAPGLDTQPVATALIAIAQQLRAFAYVAASGCKTKEEAAAYRENFAAREAMVIWPDFLTWSTVVNQTVPAPAVARALGLRARIDQEVGWHKTLSNVAVNGVTGISADVFWDLQSPSTDANYLNENEVTTLVQEGGFRFWGSRTCSDDPLFAFENYTRTAQVLADTIAEAHMWAVDKPMHPSLVRDIVEGVNAKFRELKGLGLIIDAQAWYDPNVNDKDTLKAGKLRITYDYTPVPPLEDLTFFQKITDSYLVDFASRVNA
KB-PA_3-chr1	1880734	1880300	-	CDS	Phage tail fiber assembly protein	atggcgcacttcttcggcgcagatcccgtcgctttctacgacacagcgatcaacaccgacatccccgacgatgccgtagagatcaccgcagacgagcacgccgctctgctcgcggcccaggcgcgcggcaagcgcatcgccgccggcaaagacggtcggccgatcctgctggacccacctgcacccacgcgggacgaactggagagcttcgagcgcatctggcgcgacgcacggttacgcgaaacagacccactggttgcccggcaccgcgacgagatcgaggccggggacgtgcccacgctcgacgccgagaaatacagcgcactacagacctaccggcgcgcactccgggactggccggaagctggagagtttccgctcgcagaacaccggccgaga…	MAHFFGADPVAFYDTAINTDIPDDAVEITADEHAALLAAQARGKRIAAGKDGRPILLDPPAPTRDELESFERIWRDARLRETDPLVARHRDEIEAGDVPTLDAEKYSALQTYRRALRDWPEAGEFPLAEHRPRAPEWLADELAS
KB-PA_3-chr1	1882561	1880744	-	CDS	Phage tail fiber protein GpH	atgatcgatcagaattcacagttcttcgccatcctgaccaacatcggcgcggccaagcaggccaacgccgatgcgctgggcatcccatggaagattacccagatgggcgtgggtgacgcgggcggcaccgacccgattccctcccccacccagaccgcgctggtcaacgagcgacgccgggcgccgctcaaccagttgaaggtggatccgcagaatgcggcggtgatcatcgccgaacagatcatcccggagaacgtaggcggatggtggatccgtgaaatcgggctctacgatgccgacaacgaccttgtcgcggtcgcaaactgcgcgcccagcttcaaaccgttgctgaatcagggatcgggacgcacacaggttgtgcgcatgaacctgatcgtc…	MIDQNSQFFAILTNIGAAKQANADALGIPWKITQMGVGDAGGTDPIPSPTQTALVNERRRAPLNQLKVDPQNAAVIIAEQIIPENVGGWWIREIGLYDADNDLVAVANCAPSFKPLLNQGSGRTQVVRMNLIVSNSANVELKIDPAVVLATRAYVLDQLKSYAPLFSPAFSGAPTAPTPPLFAHDQKLATTEYVRMALGSAARAISYTGNTVLDEPVIGSILVAGSHDRDFTWTTPNLSVLPTGASFHIVNISGSTLTLVQRTAADHYISADDPSGVAISYTIPNNVTATISKYQPGLWLISHVSRPTAALKSLVDGLIDGTKPAGKAVQLANSRKLTLSGQASGSVQFDGSSDVTIDVRLADNLVLTGSPSAPTPAAFDRDSSIATTEYVRAALGSMA…
KB-PA_3-chr1	1883175	1882558	-	CDS	Phage tail formation protein GpI	atgaccgcggtgccactgctacctcgcaacgcctcagagctcgaacgcctggcagcccaggcgctggcggagatacagcgggtaccgatcccgctgcgcacgctctgcaaccctgatacctgccctgcgaatctgctgccgtacctcgcgtgggcgttttccgttgaccgctggagcagcgcgtggcctgaatcggcacgccgcggcgccatccgctcggcattcttcatccattcgcgcaagggcacgatcggcgccttgcgccgcgtagttgaaccactggggtatctgatcgaggtccgtgagtggtggcagcaggcgccggccggcatccccggaaccttcgaactgctggtcggcgtactcgaaaccggtattaccgaagagatgtacgaggaa…	MTAVPLLPRNASELERLAAQALAEIQRVPIPLRTLCNPDTCPANLLPYLAWAFSVDRWSSAWPESARRGAIRSAFFIHSRKGTIGALRRVVEPLGYLIEVREWWQQAPAGIPGTFELLVGVLETGITEEMYEELTWLIDDAKPLTRHLVGLAISLESTGSVRLGAAVYDGDEIDVYPPSPRDIEVTGTIGRGGRDHTIDTLDVYP
KB-PA_3-chr1	1884089	1883172	-	CDS	Phage baseplate assembly protein GpJ	atgacaacgaacttcgtcgccatcgacctcagccagttgccgccaccacacgcggtggagcagctggactacgagcagatactcgccgagcgcaaggcctacgccatcagcctctggccagaagatcagcaggcggaaatcaccgcccgcctcgccctggagtccgagccgctgaccaagctgctcgaggaaaacgcgtaccgcgaaatgctctggcgccagcgggtcaacgaggcggctctcgccaacatgctggccagcgcccagggcgccgacctcgaccagctcgccgcgaactacaacgtcaagcgcctggtcatccagcccggagatccgtcgaaggttccgcccgtgccggaactgctggagtccgacgacagcctgcgcgagcgcgcgcag…	MTTNFVAIDLSQLPPPHAVEQLDYEQILAERKAYAISLWPEDQQAEITARLALESEPLTKLLEENAYREMLWRQRVNEAALANMLASAQGADLDQLAANYNVKRLVIQPGDPSKVPPVPELLESDDSLRERAQMAWEGLSTAGPRNSYIFHARAADGRVGDASAVSPSPAVAVITVQSAIGNGTAPAELLAVVERYLSDEDRRPVADRLIVQSAEVIEYSISASLFLTTIGPEAEPIQAAARAQLEAYVFQRRRLGMEVSESAIHAALHVEGVRKVELAGWADIAATASQAPYCTNITLTIGTEP
KB-PA_3-chr1	1884430	1884086	-	CDS	Phage baseplate assembly protein GpW	atgaacgcccataccggcggcgccatcgaccgcttggcacacatccgccagtcgatcgccgacatcctcaccactcgcatcggtacccgcgtcatgcgacgcgaatatggcagccagttgccggagctgatcgatgctccgttcaacgacaccacccggctacaggtctatgccgccaccgccatggccctcatgcgttgggagccgcgcatccgcctgagccgtgtccagatcaacgggcagaacctggccggccaggtgctcatggagattgacgccatcctggtggacagcaacgagccacacaacctgagcatccccctgcagatgggtgccagcgcatga	MNAHTGGAIDRLAHIRQSIADILTTRIGTRVMRREYGSQLPELIDAPFNDTTRLQVYAATAMALMRWEPRIRLSRVQINGQNLAGQVLMEIDAILVDSNEPHNLSIPLQMGASA
KB-PA_3-chr1	1884999	1884427	-	CDS	Phage baseplate assembly protein GpV	atgaacgacttcgccgccctctcccgcatgatcgagaacctgatccgcctcggaaccatcgccgcggtggaccatgccgcgcagcgcgtccgtgtgttgaccggtgacctgctgaccggctggctgccctgggcatcgccgcgggccggtgccgaccgggaatggaacgcccccaccctgaacgagcaggtactgctcttcagcccatccgggcagaccgccaatggcgtggtcctgaccggcttgttcagtgacctgatcccgcccaacggcgaccgcgacgccctgcatcgcaccacctaccgcgacggcgcggtgatcgagtacgacagcgccgcccaccacctgcgcgcagttcttcccgccggcggtaccaccgagctcatcagcgacggcggt…	MNDFAALSRMIENLIRLGTIAAVDHAAQRVRVLTGDLLTGWLPWASPRAGADREWNAPTLNEQVLLFSPSGQTANGVVLTGLFSDLIPPNGDRDALHRTTYRDGAVIEYDSAAHHLRAVLPAGGTTELISDGGIRIVGDITHQGDYIQTGNQTVTGKVTVSVDVIAKGISLVGHTHGGVMPGGATTGKPQ
KB-PA_3-chr1	1885527	1885069	-	CDS	Phage tail completion protein GpS	atggctgacagcctccaggctctggaagactgggcagggccgattctccgcgccctcgagccaggccctcgtgctgccctcgcgcgttcgctcgcccgcgatctacggcgcagccaacagacgcgcgtgatggcacagcgcaaccccgacggcagcgcctacgagccacgcaagaagcgcgaactgcgtggcaagcagggccgtattcggcgcaagatcaagatgttccagaagctgcgcacggtgcgctatctgcgcgccaagggcgacgcccaggcaatcaccgtttccttcgccggccgggtcacgcggatcgcgcgagtccaccagtacgggctgaaggatcgcgccgagcgtggcgccccagaggtccgttatgcacagcggcgtctactcggt…	MADSLQALEDWAGPILRALEPGPRAALARSLARDLRRSQQTRVMAQRNPDGSAYEPRKKRELRGKQGRIRRKIKMFQKLRTVRYLRAKGDAQAITVSFAGRVTRIARVHQYGLKDRAERGAPEVRYAQRRLLGFTEADLEMIREGLLAHIPA
KB-PA_3-chr1	1886056	1885520	-	CDS	Phage tail completion protein GpR	atgaacaagcccgatagtctgaaggcacatctgctcgccgccgtgccggaactcaggaacaacggcgaccgcctggtgatattcatcgacaacggcagggtccgcagcacctcggccgagagcctgtccttcgaatacgcgtatgacctgcaggtgatccttaccgacttcgccgggcaccccgacagcgtgtttctgccgctgctcggctggctgctggtgaaccagtcggagctgctggccaacctcaccaaggtgcaggacggcatcaccttcgaggccgacatgctcgaccgccgtaaggtcgatctcggtatcgttctgccgctgaccgagcgtgtcgtcgtcaagcgccgcgaggatggccgctacgacgtgagtcacccggaagagccccag…	MNKPDSLKAHLLAAVPELRNNGDRLVIFIDNGRVRSTSAESLSFEYAYDLQVILTDFAGHPDSVFLPLLGWLLVNQSELLANLTKVQDGITFEADMLDRRKVDLGIVLPLTERVVVKRREDGRYDVSHPEEPQLTEAIEVDGPMQMLANGELLAEWTPPKPTEAVMLETPQIRRPANG
KB-PA_3-chr1	1886598	1886137	-	CDS	Phage lysis regulatory protein, LysB	atgacgactctccgccaggccctatacggcgccgccctgctcagcgccctcggcctgctcctgtgggtgcagcagcagcgcatcgacctggcgcaggcccgcctggcccaggccgagttggcgaggaaagccagcgacgcccaactttctcgccaggccgacaccatcacggccctcgaggccgccctttcccgcgagcgtcaggcccaggccgatctggaccaacagcggcagcagctgcgccaggcgctggccatccgcgaacgcttgatcgaggacctgaaacgtgacgatgaaccctatcgccagtgggctgaccagcctctgcctgatgctgctcgccggctgcaacagcgccccgctatcaccggagcggccgcttatcatcagtggctgtcc…	MTTLRQALYGAALLSALGLLLWVQQQRIDLAQARLAQAELARKASDAQLSRQADTITALEAALSRERQAQADLDQQRQQLRQALAIRERLIEDLKRDDEPYRQWADQPLPDAARRLQQRPAITGAAAYHQWLSRRDALQPGVSGTEGQRRPTD
KB-PA_3-chr1	1886837	1886595	-	CDS	hypothetical protein	atgagaaccggcgcgcagtctggggagcacttcccctacaaggagcttttggagcgcatgaccaagctgtctccgactggttgtgtggccgtggtactaccgcgcgacacaccgatggaggactgccaaaagatggccgacgcgctcaagcatgtgatggctgttcctccgctggtcatctgcggtgacgtgcagtccctggatgaagcggccatgaacgccgccggctggtaccgaaaatga	MRTGAQSGEHFPYKELLERMTKLSPTGCVAVVLPRDTPMEDCQKMADALKHVMAVPPLVICGDVQSLDEAAMNAAGWYRK
KB-PA_3-chr1	1887640	1886834	-	CDS	Phage endolysin	atgacccttcgatatggtgatcgttctcaagaggtccgccagcttcagcgtcgactgaacacctgggccggcgccaacctctacgaggacggccacttcggcgccgccaccgaggacgcggtgcgcgccttccagcgctcgcatggcctggtcgccgatggcatcgccggcccgaagaccctggccgctctcggcggagctgactgctcgcacctgctgcagaacgccgacctcgtcgccgccgcaactcgcctcggcctgccgctggcgacgatctatgcggtcaatcaggtcgagtcgaacggccaggggttcctgggcaacggcaagccggcaatcctgttcgaacgccacatcatgtaccgccgtctcgccgcccacgatcaggtcaccgccgac…	MTLRYGDRSQEVRQLQRRLNTWAGANLYEDGHFGAATEDAVRAFQRSHGLVADGIAGPKTLAALGGADCSHLLQNADLVAAATRLGLPLATIYAVNQVESNGQGFLGNGKPAILFERHIMYRRLAAHDQVTADQLAAQFPALVNPRPGGYAGGTAEHQRLANARQIDDTAALESASWGAFQIMGFHWQRLGYISVQAFAEAMGRSESAQFEAFVRFIDTDPALHKALKARKWADFARLYNGPDYKRNLYDVKLEHAYKQHTEAHKETT
KB-PA_3-chr1	1887909	1887637	-	CDS	Phage protein	atgctcatgactaccgttccgttgatcgccgccctggcctacatcgccgcagcgctgcgcctggtctgctaccagcgctgcggcgctcgcttccgccgcagcgtctcgttgctcgccagcctgctcggcgcatccatggccatctgcggcctggaaatcctgctctaccgcccaccggtcagtatctggcacgccatcgtcgccgccctgctgtgcctgctgatcttccgttcccgcggcaacgtcgccgccctgctgaggccatccgcatga	MLMTTVPLIAALAYIAAALRLVCYQRCGARFRRSVSLLASLLGASMAICGLEILLYRPPVSIWHAIVAALLCLLIFRSRGNVAALLRPSA
KB-PA_3-chr1	1888264	1887911	-	CDS	Phage protein	atggctgacctcaccaccaccgccacggccggcgccatcatgggcctcggcctgggcgtaacccttccggtcgatggcggcatgctgttcggcgcactgctcggcgcctggctggccaccggcacgaagcaggacctgaaggcctggtcgcgcctgctgtcgctgatcctgccgacctgcgtcggctacctgttcgccgatgtcgccctcgcccgcgtgccctggctgaccaacctggccttctctgccttcgtctgcgccctgatggtcattcccctcagcctcaaggcggtcgcctgggtcgacaaggtcgacttcgacgacctctggcgccgcatccgaggaggtcgctga	MADLTTTATAGAIMGLGLGVTLPVDGGMLFGALLGAWLATGTKQDLKAWSRLLSLILPTCVGYLFADVALARVPWLTNLAFSAFVCALMVIPLSLKAVAWVDKVDFDDLWRRIRGGR
KB-PA_3-chr1	1888501	1888289	-	CDS	Phage tail protein GpX	atggccgccgtcgcgatcgcccaccagaacgacaccgtcgaggcgctgtgctggcggcactacggccgcaccgccggcgtgaccgaggcagtcctcgaggcgaaccacggcctggccgaccacggccccactctcccccctggcctcaaggtcaccatgccggacattccgacagccgccccggaacggcagatggtgaacctatgggactga	MAAVAIAHQNDTVEALCWRHYGRTAGVTEAVLEANHGLADHGPTLPPGLKVTMPDIPTAAPERQMVNLWD
KB-PA_3-chr1	1888962	1888501	-	CDS	Phage head completion-stabilization protein GpL	atgagcggattcatcgccaacggcccggtcccgagcgggcacatcaacagcgatcccttctggcccaccatcgagctcgagcatgtgcgggcgaacctgcgcatcgactccagcgtcgatccagcgcgcctcgaagttgcggtcattgccgcggtgatcagcgtcaaccgcgagctgcgggcctggcgccttgagaagagcgcggccggctatgccgaactcgcccaggtgccgtccgacaaggtgcgggacacctccgaactggtgcagctgtatctgcgcgccgtgcagtctgccaccgccgccgaagtggccgagcgctaccgctggtacgacaccaccaccagcggcaacgacaaggcccaggacatcgcaaccaccatcgacgactaccgccgc…	MSGFIANGPVPSGHINSDPFWPTIELEHVRANLRIDSSVDPARLEVAVIAAVISVNRELRAWRLEKSAAGYAELAQVPSDKVRDTSELVQLYLRAVQSATAAEVAERYRWYDTTTSGNDKAQDIATTIDDYRRDQRWAIRDFLKRPRTTVELI
KB-PA_3-chr1	1889767	1889066	-	CDS	Phage terminase, endonuclease subunit GpM	atggccttcagtcccgccaaggcgcacttcctgcgcgtgaccgccgctcaagaggcggcggccactgccccgcaccagggcatggaaggcgcgaacgcctatgagctgcagctcgcccagctgtatcaggatcgcagccgcctgaagaacatccagtccggcgaaggcaaggcagcactcaaggtcgagttgctgccggcctaccaaccgtacatttccggcgtgctgcaggccggtaagggcgcccaggacgaggtgatcaccaccgtcatgctctggcgcatcgatgccggcgattacgccggcgccctggacatcgccgactacgtgctcgcacacgacctggtcatgcccgaccgcttcgcgcgtaccgccggctgcgtcatcgccgaagagatc…	MAFSPAKAHFLRVTAAQEAAATAPHQGMEGANAYELQLAQLYQDRSRLKNIQSGEGKAALKVELLPAYQPYISGVLQAGKGAQDEVITTVMLWRIDAGDYAGALDIADYVLAHDLVMPDRFARTAGCVIAEEIAEAALKAQKTGGSFDLATLHRTLLLTDQADMPDEARAKLYLAAGHATLEGLSVESPGQPGQVQAGIDLLKRAIQLHDKCGGKKDLEAAERLQKKLTASGG
KB-PA_3-chr1	1890789	1889773	-	CDS	Phage major capsid protein GpN	atgcgcaacgaaacccgcaaacagttcgacgcctacctggcgcagctcgccaagctcaacggcgtgaactccgccgtccagaccttcgccgtcgagccgagtgtccagcagaagctggagcaacgcattcaggagtccagcgagttcctgaagcagatcaacgtctacggcgtcgacgaactgcaaggcgagaagatcggcatcggcgtcagcggcaccatcgccagccgtaccgataccactggcgacggtgtacgcaagccgcgcgacgtgtccgcgctcgacaaccagcgttacgagtgcaagcacaccgacttcgacaccgcaatcacctacgccatgctcgacgcctgggccaagttcccggagttccaggccctgctgcgcgacgcgatcctc…	MRNETRKQFDAYLAQLAKLNGVNSAVQTFAVEPSVQQKLEQRIQESSEFLKQINVYGVDELQGEKIGIGVSGTIASRTDTTGDGVRKPRDVSALDNQRYECKHTDFDTAITYAMLDAWAKFPEFQALLRDAILKRQALDRLMIGFNGTSAAATTNRAANPLLQDVNIGWFQQYRNNAPARVLKEGKTAGKVVVGNGADADYKNLDALVFDVVSSLIDPWHRRDPGLVVILGRELVHDKYFPMVNKDQPATEKIATDLILSQKRMGGLPPVEVPYVPEKGLMVTTLKNLSLYWQIGGRRRYLKEVPEKNRIENYESSNDAYVVEDYGLGCLVENIEVAE
KB-PA_3-chr1	1891637	1890825	-	CDS	Phage capsid scaffolding protein GpO	atgaagaaattccgcagcaaatggttccgcatcgccgtcgaaggggcgaccacggacggccgcaacatcgagcgcgactggatcgagcagatggccgcgcagtacgacccgaacacctacggcgcgcggatcaactgcgagcacatcaagtgggcctggccggctggtgagttcggcgcctatggcgacgtgctggcgtgcaaggcggaagagatcgacatcaacgggcagaagaagctcgccctcttcgcccaactggagcccaaccaggcgctgctggaactgaacaagcagcggcagaaggtctacacctcggtcgagatcgatcccaagttcgccgacaccggcaaggcctacttggtcggcctggccatcaccgactcacccgccagcctgggc…	MKKFRSKWFRIAVEGATTDGRNIERDWIEQMAAQYDPNTYGARINCEHIKWAWPAGEFGAYGDVLACKAEEIDINGQKKLALFAQLEPNQALLELNKQRQKVYTSVEIDPKFADTGKAYLVGLAITDSPASLGTEALSFSAKNGTLASRKTNPDTLFSAAEEGTLEFEEYEDKPSVGAALFTKVKELLKGKEARTQAEFGEAVEAIAEHSRDLGEQLGEQKKQTQQLASQLDKVTKELADLKSTLDSTRDHSQQQRPPVTGGGSVALTDC
KB-PA_3-chr1	1891772	1893556	+	CDS	Phage terminase, ATPase subunit GpP	gtgggcggcagcatctgcgccatgaacgctgccgtcgaaattcccatccgtgacaaccgccgccaggccaaattcctgtactggatggggtggcgtgtctgcgacatcgccgatcacctgggcgagaaggacaagacccttcactcatggaaggaccgcgacggatgggaccgggccgacagcgtagaacggatcgggggcgccctggaagcccggttggttcagttgatcctgaaggacggcaagaccggcggtgactacaaggaaatcgacctgctgcatcggcagcttgagcgccaggcgcggatccagcgctaccagggcggaggtacggaaaccgacctgaaccccgagcttgccaagcgtaacgaaggtcccaagcgcaagccgaagcgcaac…	MGGSICAMNAAVEIPIRDNRRQAKFLYWMGWRVCDIADHLGEKDKTLHSWKDRDGWDRADSVERIGGALEARLVQLILKDGKTGGDYKEIDLLHRQLERQARIQRYQGGGTETDLNPELAKRNEGPKRKPKRNDISEELTEKLVEAFLDGCFDYQKDWYRAGNQRTRVILKSRQIGATFYFAREALIDALETGRNQIFLSASKAQAHIFKAYIQAFARDAVGVELKGDPIILPNGAELHFLGTNARTAQGYHGNFYFDEFFWTFKFKELNKVASGMAMQKRYRRTYFSTPSSMAHEAYTFWTGERFNKGKPAADRIKIDVSHDALQQGRLCEDRIWRQIVTILDAEARGCDLFDIDELRLEYDAEAFQNLLMCQFVDDGASIFPLTMLQPCMVDSWDLW…
KB-PA_3-chr1	1893553	1894608	+	CDS	Phage portal vertex protein GpQ	atgagcaaacgtcgcagccaccgccgccagcagccagttacagtccagtccgcccaggaaggcgagttcatcccgcgccagggcggccgtgccgaggccttcaccttcggtgacccgatgccggtgctcgacggccggggcatcctcgactatctcgagtgctggtcgaacgggcggtggtacgagccgccgctgtccatggaggggctggccaaggcggtggggtcgagcgtttacctgcagtcgggcctgaagttcaagcgcaacatgctggccaagaccttcatcccgcaccgcctgctcagccgggcgacgttcgagcagttctccctggactggctgacattcggctcggcctacctcgagcagcctcgttcgcgcctgggtacgcggatgccg…	MSKRRSHRRQQPVTVQSAQEGEFIPRQGGRAEAFTFGDPMPVLDGRGILDYLECWSNGRWYEPPLSMEGLAKAVGSSVYLQSGLKFKRNMLAKTFIPHRLLSRATFEQFSLDWLTFGSAYLEQPRSRLGTRMPLQAPLAKYIRRGTDLETFYQVRSWKDEHEFEKGSVIQLREADINQEIYGVPEWFCALQSALLNESATLFRRKYYNNGSHAGFILYMTDAAQNEEDIDALRTALKTAKGPGNFRNLFVYAPNGKKEGIQLIPVSEVAAKDEFGSIKNISRDDQLAGLRVYPQLMGVVPQNAGGFGSISDAAAVWASLELEPMQARLQQVNELIGEEVVRFAPFDAPGEK
KB-PA_3-chr1	1896064	1895213	-	CDS	Phage antirepressor protein #of cryptic prophage CP-933M	atgagtgccgcgcagcaactgatcccagttcccttctacgaagacacgctggttctggtcaggcaagccaacgagccctatgtggcgatgaaaccggtggtggagaacatgggactcgcctggcaagcccaacatgtgaaattggcggaaaagttcggttcagttatcacgataatcgtgacaactggagctgacggaaaacggtatgacatgacctgcctaccgttgaagaaactccccgcctggctctattcgatcaaccccagcaaggtgaagcccgagctgcgcgagaagatcgtccgctaccagaacgagtgcgacgatgccctatggaactactggactaagggctgcgccgtccgcggcgatgccccgaacaccactcagcgcatcgcactg…	MSAAQQLIPVPFYEDTLVLVRQANEPYVAMKPVVENMGLAWQAQHVKLAEKFGSVITIIVTTGADGKRYDMTCLPLKKLPAWLYSINPSKVKPELREKIVRYQNECDDALWNYWTKGCAVRGDAPNTTQRIALSRHRLALAKELYKTRDPALRQTIHQQLDEVSRAMGLPTPEIDSLGAATPTAPDVLKGFWQALAFLDSKGVAYNHSRAANLLAVNLPELARLLIEHGHPLRFDSALRQGLWLSSAPRCLHKNHPTKSRLVDKTVRCWIFAMHPTAKELSEV
KB-PA_3-chr1	1896225	1896061	-	CDS	hypothetical protein	atgaacagccttcgccacctgctcagccgcctggtgcatacccctgatgaacaggtcctattgctgtactatcgccagcttagccacagcgatcagagcttcattcgtcgaactgtccaagccttggtgcagtgtccggcagtcccaaagggagagaaagaatga	MNSLRHLLSRLVHTPDEQVLLLYYRQLSHSDQSFIRRTVQALVQCPAVPKGEKE
KB-PA_3-chr1	1896440	1896222	-	CDS	hypothetical protein	atgtccgaaaagcgcccatacggtctgaccgaatacgaccatcttcgcctcaccaacgcacggaacaccctacgcctgttggactatctcgccgcagcccgccaccaagaggccatcgagccggagctgctgagcagtgcattctggctgctggccgaacatctcgaccaagtactcatcagttccgaacaggcacctgccgggagggcgcgcgcatga	MSEKRPYGLTEYDHLRLTNARNTLRLLDYLAAARHQEAIEPELLSSAFWLLAEHLDQVLISSEQAPAGRARA
Additonal Region 10
KB-PA_3-chr1	2000343	1999294	-	CDS	hypothetical protein	atgggcaaaggcatagcgcttgagtttaaaaagcgctggcccggcctaatgagcgactacgagaagaagtgcaagagcaaagaggtcaaactgggtgaaccatacctctacacggatcttgctggcacttctatagttaattttcctacaaagggacattggcgcgccgcatccaggctcgcagacattgagtcaggcctactatacttcgtaaagaagtataaagaatggaatattgagtctatcgcattcccaccactgggatgtggtaatggaggtttagaatgggacgtcgtggggcctcttatgtataaattactttcaaaggtaaccatccctgttgagatttatgcaccgtttgggactccggcaagcaagctatcggtggagtttctaagc…	MGKGIALEFKKRWPGLMSDYEKKCKSKEVKLGEPYLYTDLAGTSIVNFPTKGHWRAASRLADIESGLLYFVKKYKEWNIESIAFPPLGCGNGGLEWDVVGPLMYKLLSKVTIPVEIYAPFGTPASKLSVEFLSPSQQRLFDELGHKGTRGPKLNPNWLVMLEVMDQLEQQPYAPKVGRTIFQKICHAVTALGVETELDFKKASYGPFSEQVQKLLGTLANANLIQEVQLGRMNHLKTGPEYKKIREKNRDVLSLHRSRIDKTVDLFSRIKDTEQAEEVATVFFAVSKLKEEQQVQIVPEREVFDFVLSWKKAWNTDEKRESIASAIRNLAMLGWIRVSLSECMPLSEFA
KB-PA_3-chr1	2001026	2000427	-	CDS	hypothetical protein	atgagccatcgcgttacggagctgcactgcattatgccgctggacaacgtcccgtcggtactgatgaacggcatcctgtgccatgagctcgccgaccagattcagcataggtcggtggccatgcaggaaattcaagaccgtcgccacaacaagtcggtccccggcggcatgcggctccaccagtatgcgaatctttacttctgcgcccgcaacccgatgatgtacaagcgacaggatgaacactacaacctctgtgtgatcagagtcagcatcgacgtgatgtcggagcgaggcgtggtgttgagcgatcaaaacgcagccagtgactatgtccggttccattcctacccggacggtcttcgccatatcgtatttgacgatgtgtacgcggactggtgg…	MSHRVTELHCIMPLDNVPSVLMNGILCHELADQIQHRSVAMQEIQDRRHNKSVPGGMRLHQYANLYFCARNPMMYKRQDEHYNLCVIRVSIDVMSERGVVLSDQNAASDYVRFHSYPDGLRHIVFDDVYADWWNDDDLATSYRKKARKCAETLVPKRVEPRYLTGFYVCNNQVKRTLEGLLSLQQCQLPVIANPHLFFR
KB-PA_3-chr1	2002263	2001091	-	CDS	Phage integrase	atgggtagagatgggcggggagtcagggcggtctctgattcgagtatcgaaatcacgttcatgtatcgcggcgtcaggtgccgggagcgcatctcgctcaagcccaccgccactaacctgaagcgagcagagcagcacaaggcggctatcgaacatgcgatcgccgccggtaccttcgactactcggtgacatttcctggatctccgcgcgccgccaagtttgcgcctgaggcgtcacgcgagacggttgcgggattccttggccgatggcttgagtcgaagcgcaagcatgtctccagtagtaccttcgagggctacaggaagattgtagagcttcgtctggtgccggccctagggcccgtcatggtggtcgacctgaagcggaaggccgtcaaggat…	MGRDGRGVRAVSDSSIEITFMYRGVRCRERISLKPTATNLKRAEQHKAAIEHAIAAGTFDYSVTFPGSPRAAKFAPEASRETVAGFLGRWLESKRKHVSSSTFEGYRKIVELRLVPALGPVMVVDLKRKAVKDWLDTLKVSNKTLSNIQSCLRSALSDAMEEELIDSNPLAGWTYARKGEVKVDDVDPFSPEEQRAILSALDGQGRNLVQFAFWTGMRTSELVGLEWGDIDWLRGEAHVTRAMTQAAKGKAEVTKTTSGRRSIKLLGPAMEALKAQKAFTYLANQEVFQNPRTDERWAGDGPIRKTLWVYALKKAGVRYRRPYQTRHTYASMMLSAGEHPMWVAQQMGHSDWTMIARVYGRWMPGADELAGAKAEAVFATHQVKRNADSA
KB-PA_3-chr1	2002735	2002406	-	CDS	hypothetical protein	atggctagaactctgcttcgcgtaatgaggggagagtttgcgttctacctgaccgaagggtcgaagggcggcaagaaaggaggggcgcgctgggccttataccggaccagtggattcgggaaggtcaaagacggctttgtcttcgtcaacagcggtgaccgcgccagactgctggcaatgacgaacgacggtgagcaaatggatgcctgcctggcactgttcgacagtaagaaacgccgggcctacgttcggcgctgcgagattcgcggcccatccggccgctgggaggggcttgcattcaagcctaggcctcaggaatgcgctacctga	MARTLLRVMRGEFAFYLTEGSKGGKKGGARWALYRTSGFGKVKDGFVFVNSGDRARLLAMTNDGEQMDACLALFDSKKRRAYVRRCEIRGPSGRWEGLAFKPRPQECAT
KB-PA_3-chr1	2003447	2002728	-	CDS	hypothetical protein	atgaagggcgcaacgttgcacaggctgatcgatatctacgtcgacagtcgccgtaacctgcgcgtccgtttagcagccctccggatgttcgtccgcgcggtgtgcgccgatcgcgacaccagcttcgccgagtatcgccagatgcgtcggcggctcctcaagggcatgccgttcaccgagcaggcgcttgagcgcgagcgagcggcatatctggatcgcaccagagctgcgaggcaagccatggaggagagcggtgcctggcttatcggaaactcagcaatgatcgagcaggctctgtcgttcgacgacctgtgcgatctcttgggggtgaatcatgcccaccgtgccgaggctgccgaggtctgcgcgggcggcgccggactcgttggcggcctgctc…	MKGATLHRLIDIYVDSRRNLRVRLAALRMFVRAVCADRDTSFAEYRQMRRRLLKGMPFTEQALERERAAYLDRTRAARQAMEESGAWLIGNSAMIEQALSFDDLCDLLGVNHAHRAEAAEVCAGGAGLVGGLLWIGGEFEDSADHKSGRSNRWNTGPLTAAVQNLFQKFLLENPSAIPDPFAPGGPFYGAPRQEMAPNGTVQIRRPALTVHSQDGSTRTVERKPEAYSVVAKDGGGLHG
KB-PA_3-chr1	2003635	2003444	-	CDS	hypothetical protein	atgagaggctccgacattccgccaccaccagggtatcgccctaccccgctcgctacccttggccaacagttggtacgcctgggccaggcgatgcagaaccccaacaccaagctcggcgagttgaccgaactggtcaaggcctgcggcgtcgacctgcggatctgcgacacgaacaaggagagtcgggaatga	MRGSDIPPPPGYRPTPLATLGQQLVRLGQAMQNPNTKLGELTELVKACGVDLRICDTNKESRE
KB-PA_3-chr1	2003757	2003635	-	CDS	Phage protein	atgaccatgcgcaaggctctgaccgccatcgcactcgtcgcgatgctaggcctggctgcggttgccgccggcgcagcgctccagccgttcaagaccctgttcatctgggaggtatgccagtga	MTMRKALTAIALVAMLGLAAVAAGAALQPFKTLFIWEVCQ
KB-PA_3-chr1	2004461	2003754	-	CDS	Phage protein	atgacccatgccctgtttaaacagatcgatctgaccgccaagctcggccaggacggcagctcgctccaagccctgaacgcgctgcgcgtcatccgggaaacggtagcgaagcacctggtcggtgccgaggctgcagaagagcatccgctcgagcgcgccatcctggcgctccgcaccatcgccgagtatccctgtcccgagcaagacgacctgccggcggcgaacatgcgacagatcgcactggccgcgctggacggcgctggagcgagttccgaaccgggcaatcctggcggcgaacctgtttccggaccgggtaatgccggcgagcaaacccaccccgcgccgggattggcccgcgagcacgccgaactacgccgaattgctgtcgcgctcaagaac…	MTHALFKQIDLTAKLGQDGSSLQALNALRVIRETVAKHLVGAEAAEEHPLERAILALRTIAEYPCPEQDDLPAANMRQIALAALDGAGASSEPGNPGGEPVSGPGNAGEQTHPAPGLAREHAELRRIAVALKNPLLSGEEASNLMVRYEALTMPDHIIALIDGQAQAIVPKGWKLVPLEPTPEMLDARRDSEDGMDGYLVEDTEYYFPDRGAVRDFLACVYRGLLAAAPAPGGER
KB-PA_3-chr1	2004793	2004458	-	CDS	Phage protein	atgaagcaagcactcatcggcaccgcgatcagcctgctgctcagcgcgtgtctgtacttcggacatggctccatccaccagttcgccttctatgtgtcagcggccctaaatgtcctctgttggctgctgatcttcgccggcggcatcaaggggcaaggagccgcgaacatgctcgcccgcccttggctctccatccctactggcgctctgcacgtggcggccctggcccacacagatcaccccgcactcgcggcctcaagcctgctggtgcaaatggcttgctacgccctcgcctaccaggcggtgcgcagagccgagcaagggggtgatctatga	MKQALIGTAISLLLSACLYFGHGSIHQFAFYVSAALNVLCWLLIFAGGIKGQGAANMLARPWLSIPTGALHVAALAHTDHPALAASSLLVQMACYALAYQAVRRAEQGGDL
KB-PA_3-chr1	2005026	2004796	-	CDS	hypothetical protein	atgaaacgagcaaccgttgtaaccgaactgccggccagcaccagccgggatatggacaagttcgttgtccgactgccggacggcctgagggccgaggtcgaagccgaggccaagcgagacgagcgcagcatgaactccctgatcgtcgttgccctgcgcgagtacctgcatggccagcgccgaaagcatgcgctactcgacgccttgaccgctgccgccggaggtcgctga	MKRATVVTELPASTSRDMDKFVVRLPDGLRAEVEAEAKRDERSMNSLIVVALREYLHGQRRKHALLDALTAAAGGR
KB-PA_3-chr1	2005898	2005101	-	CDS	Phage antirepressor protein	atgaacctgattccatacgacttcaacagcaagcgcctccaggtgctcgtcgacgagaacggcgagccttggttcatcgcgatggaggtagccgagatcctgggctattccgacgcttatgagatgaccaagcgtctggatgaggacgaaaagtcaaaccggcaaatcgccggtttgggtactgcctcgggtggtcgtggtgtaaccaccattaacgagtccgggctgtactcgtccatcatcggcagcaacaagcccgaggccaagccgttcaagcgctgggtgacccacgatgtgctacccagcatccgccgcaccggcagctactccatcggccatcagcaagcgccagccctcaccagcgatgcatgccagatcatcgagtcgatgagccgcacg…	MNLIPYDFNSKRLQVLVDENGEPWFIAMEVAEILGYSDAYEMTKRLDEDEKSNRQIAGLGTASGGRGVTTINESGLYSSIIGSNKPEAKPFKRWVTHDVLPSIRRTGSYSIGHQQAPALTSDACQIIESMSRTLNLAPSATLGMYQRLGAKVGHADLLPAYTVDSPDQDGTSHVTAALSDLLRSHEVQASARQVYKLMEAAGLVERLSRPSSKGSGTREFWALTEKGLAFGKNLSNPNNQREVAVHLYVDRFEALLQCLHGETLQ
KB-PA_3-chr1	2006199	2005909	-	CDS	Phage baseplate hub	atggacaagctcgaaatcgaatacgccctagccaagcaggttcccgacatggctcgcggcttcaccatcgcgaccagctatggcgagcttcacgtcagcgccgttgacgcccctgtcgtgatgaaggtggtccgcgatctactcgagagtgagctcgagcgggccaaggcgcacgagcggcaggaggccaacccggagcaaccaagcaccacgccatacccgcgccagcccggcgtatcgatcttcgacgtgatcacgcgtacggcccctggcatgcgcgaccgagagtaa	MDKLEIEYALAKQVPDMARGFTIATSYGELHVSAVDAPVVMKVVRDLLESELERAKAHERQEANPEQPSTTPYPRQPGVSIFDVITRTAPGMRDRE
KB-PA_3-chr1	2006593	2006210	-	CDS	hypothetical protein	atgaccaccgccagcatcaccgcacacggtttcaccggcttcctcggcaagggcctgtccctgcgtgagcttcagtgcgtcttgggcatcgctgcgggtcgcaccagcaaggagctagcccgcgacctgggcatgcagccgggcacggtgggtaagcgcgttctggcagcgaccaccaaactcggcgtcacccgccgtgccgccctggtggctgaagccatgcgccgcgggcttatctcgcccgccgtgatcgccctcgccttcctcgtcgccggtcagccactgctcaacgacgaccacatgatgcgcagccgtcggggtggggagcgtcggattgagtttcgagtggctgcgcgccgggctgaaacctggctgaccgcataa	MTTASITAHGFTGFLGKGLSLRELQCVLGIAAGRTSKELARDLGMQPGTVGKRVLAATTKLGVTRRAALVAEAMRRGLISPAVIALAFLVAGQPLLNDDHMMRSRRGGERRIEFRVAARRAETWLTA
KB-PA_3-chr1	2007910	2006816	-	CDS	Prophage Lp2 protein 6	atggagttcgaagagaaactggccagcctggccgccaagattcgccagcagaaatctgccatccagactgaagaggcaacaaagactgcatttgtcatgcccttcatacagtcagtcttgggatacgatgttttcaaccctttggaggttgttccggagttcacttcggatataggaactaagaagggagagaaggtcgactatgcaattctcaaggagggagagatccagatactcatagagagcaagaaggtcggcgaacccttaaatattaatcatgccagccaactatttcgttacttccacgttacaaatgctagaatatccattctgacaaatggccaggtctacaagttcttcactgacctggatgcacctaacaagatggatgagaagcca…	MEFEEKLASLAAKIRQQKSAIQTEEATKTAFVMPFIQSVLGYDVFNPLEVVPEFTSDIGTKKGEKVDYAILKEGEIQILIESKKVGEPLNINHASQLFRYFHVTNARISILTNGQVYKFFTDLDAPNKMDEKPFLELDLLDIDDHAIPELQKLTKSAFDVESIINAAGELKYVGQIKRALASQFSQPDEDFVRLFASRVYEGIITQKVRDQFTQLTRKAASQFLSDQINERLKSAITGNSQPVLVAQPQAEQSTPSSHGEEEEKDRVVTTAEEIEGYTIVKAIVRSVVDVKRIAARDTQSYFGILLDDNNRKPIARLHFNRSQKYIGTFDSEKNETRHPIESLDDIFAHAEALKATAISYDTQS
KB-PA_3-chr1	2008720	2008001	-	CDS	Phage repressor	atgcagacacttcaagaacgacttaaacgtgcgatggcaggcccaccgagggttacgcaagcggctcttgcacgcgcttgccatatcacagcgccctcagtaaatgactggatctccggaaagacaaaaagcatcgaaggggagaatctcctcaatgctgcagcgtttctgaaagttagcccgctgtggcttgcaactggaaaaggccccatgcgagagcatggagctataagcagggacagtcctgagcaagcgggtggctcgctgaacgagcacgccaacgtgatctcggtggctacgcctccaagaaagaggaataaatatccagtgatcagttgggtcagggctggcgactgggcagaaagtccggacaattttcagccaggcgatgcagatgat…	MQTLQERLKRAMAGPPRVTQAALARACHITAPSVNDWISGKTKSIEGENLLNAAAFLKVSPLWLATGKGPMREHGAISRDSPEQAGGSLNEHANVISVATPPRKRNKYPVISWVRAGDWAESPDNFQPGDADDWLESEEKAGPHGYWLVVNGDSMTPLFPQGSRILVQPEGFDLISGKYYVAVCYEPGKKRDTTVKQYVRDAGFEYLKPLNPIYRTLEVSDTVRIIGRVIDYKLPAGVL
KB-PA_3-chr1	2008816	2009028	+	CDS	Phage regulatory protein	atgacacccagcgagatcattgatgccctcggcgggacaacccgtgtggcagagctgtgcgaggtgaggcctccgtcggtaagcgactggcgaaagcacggcatcccccgcgctcgactgatgttccttcgaatcgctaaacctgaagtgttcgcaaaactggaggccaaggtaaaaggccaagaaaggcaggtcggcagcagagttgcctga	MTPSEIIDALGGTTRVAELCEVRPPSVSDWRKHGIPRARLMFLRIAKPEVFAKLEAKVKGQERQVGSRVA
KB-PA_3-chr1	2009744	2009523	-	CDS	hypothetical protein	atgactgatgctgctgaagaaagaatcccgaccatcgatttacagtccctcctagacacgcttaacgcgctgcccaaagacacccgcgtaggcttcagcggcctgaccttctaccgcgtcaagtggcgaggccagacgatggtgaatatcgagttcagcgagcatgttcatcggaactcgaaaggtgaggttgttgttgaagctcctgggccagagaactga	MTDAAEERIPTIDLQSLLDTLNALPKDTRVGFSGLTFYRVKWRGQTMVNIEFSEHVHRNSKGEVVVEAPGPEN
KB-PA_3-chr1	2009932	2010249	+	CDS	hypothetical protein	atgcaacagaaaacccaaaacgcgcaacccccgcgctctgctcatcaactcgcatcagacctgctggatggcctcgaagccgctgttgagaccgtcaaggggctgcgcgccatccttgcactggtccgtagagatgagcagtgcagcagttacctcaaggatatctgcacgataggactcggtcaggccgagttcgttggtgggaaccttgaggatgatatgaaacaggccgacgcagaattgttcgaactggaacgtgtcgcgacccaatccggaaatgctgaaaacgtgtcgcaacacgaaggaggtgcagcatga	MQQKTQNAQPPRSAHQLASDLLDGLEAAVETVKGLRAILALVRRDEQCSSYLKDICTIGLGQAEFVGGNLEDDMKQADAELFELERVATQSGNAENVSQHEGGAA
KB-PA_3-chr1	2010246	2010518	+	CDS	hypothetical protein	atgagcgcgatcaagctcgggctgtctgcactgaagggaccggtatctccgcttccgcccgccgggttcgctgcgatccatccgaccactacggtcgaagaggcgctgagcgcggccactgctctgacctccagtgtttccagcattctcggagcactgactacctccgacgaagagcgcgtagatatggacgccctcaagctctgctctcgcctggctggcgaactggtcgatgccgcgctggacgccctgcgtaaggaggtctgccaatga	MSAIKLGLSALKGPVSPLPPAGFAAIHPTTTVEEALSAATALTSSVSSILGALTTSDEERVDMDALKLCSRLAGELVDAALDALRKEVCQ
KB-PA_3-chr1	2010515	2010823	+	CDS	hypothetical protein	atgaacctgtcgacgctgctcatcagtctgtgctcccgggtcccgggcgaagacctgaccgataaacagattctctccataaagtcagatctggggtcggctcggcacgccgctcagaacatggcgcttggtgtcgccgccgtcgggaacctgctggcgaacgttggcgctgaaggcgaagtaggccaggaaacctcagagcgactcggctggtttctggaggagatcggggggggcatcttccagcttgtggagctcgagcaggtcctcttgggtcgcatcaaccggcagaaggaggctcagcaatga	MNLSTLLISLCSRVPGEDLTDKQILSIKSDLGSARHAAQNMALGVAAVGNLLANVGAEGEVGQETSERLGWFLEEIGGGIFQLVELEQVLLGRINRQKEAQQ
KB-PA_3-chr1	2010820	2011098	+	CDS	hypothetical protein	atgagggccaccctgggtatcagcttccgggcgactgcgccggttgatctttcgaagggagatcagaaagcgaatgtcctgtgcgtgatggatgacattgatgccgacctcgcattggacagcgcagtcgacctgcttgacgcgattcaaggcgggctcctcgacatcctcgacgagccgagtgttagtcgtcgcgtagtcctacttcttcatgcggccgagacagccactgccctggttcgtgctgccctggagggtggggaggtggccaatgactag	MRATLGISFRATAPVDLSKGDQKANVLCVMDDIDADLALDSAVDLLDAIQGGLLDILDEPSVSRRVVLLLHAAETATALVRAALEGGEVAND
KB-PA_3-chr1	2011124	2011333	+	CDS	hypothetical protein	atgcttggcgatctgatccagggctatgtcggtgctattcacgatatggccgctgctgttcgcgaagacttggctttcgagggtagcgacccgggaccgcgcctgactgacagccaggtggactcgatcctcctatcgatcactacgcttgccaacctagcctccggagacctgtccgatctgctgaacgagatggaggtgccggcatga	MLGDLIQGYVGAIHDMAAAVREDLAFEGSDPGPRLTDSQVDSILLSITTLANLASGDLSDLLNEMEVPA
KB-PA_3-chr1	2011330	2012106	+	CDS	putative DNA-binding protein (Roi)	atgactgacctgaccatcattggcggccaggccgccacgatgaccagtttggaaatcgccgaactggtcggatcccgtcatgacagcgtgaagcgaaccatcgagcgacttgctgcttccggcgttatctcacaaccaccaacggtggaagtcaaagtccagcgtgagcgccgggaggaggcggtgaaggtctaccgctttgaaggcgaacagggcaagcgcgacagcatcatcatcgtcgcccaactctgcccggagttcaccgcccagttggtggaccgctggcaggaactggaacagcaggcttcccggccactgaccgccgccgagcaattgctggccagcgtgcaactcaccgtcgatctggagcggcgacagcggcagaccgagcagcaggtg…	MTDLTIIGGQAATMTSLEIAELVGSRHDSVKRTIERLAASGVISQPPTVEVKVQRERREEAVKVYRFEGEQGKRDSIIIVAQLCPEFTAQLVDRWQELEQQASRPLTAAEQLLASVQLTVDLERRQRQTEQQVAALTETVGDMDRSHPLLDSIPNGMESITAIRQRIGKQYGLPPRVIDAVVREMPHSPRPFAMVRSKHEELNARPFAVWAKAEISRVFERFARGCTFVTQHRATHPDFGAGRERFQMRGTPSQEIGE
KB-PA_3-chr1	2012103	2012333	+	CDS	FIG00964051: hypothetical protein	atgacctcacaaccaaaaccgggtcggatcatcactggccccaacggccgcccggtgatcgccgggccctggccgtcctaccgtcaattccgcgacctgcccgagcgtgagcgctgggttctttacggccacgccaaggcatgccgcggtgcgcttgaagatcaaggattcctcatggccgagggatacgacgactttgtgaagcgcgttaccgaggagctcgatatatga	MTSQPKPGRIITGPNGRPVIAGPWPSYRQFRDLPERERWVLYGHAKACRGALEDQGFLMAEGYDDFVKRVTEELDI
KB-PA_3-chr1	2012330	2013346	+	CDS	hypothetical protein	atgagtgaagcagtgccagccgctccgctggtgccgatggaggtcgacttgcgcggccttccgttcatgccgctcgacgttgtccggttgctcgacagtgacttgttcgcgctcaccagcggcgacgagttcaaggcagcgctttccctgtggtgcaaagcctggctgcaggtcccggccgcttcgcttccgaacgatgatcgggtgctcgctcatctttcaggagccggcgcgcgttggcggaaggttaaggacatggcgctgcgtgggtggcaactgtgtagcgatgatcgcctgtatcaccctgtgatcgccgaaaaagcccttgcggcgtgggacgaacgtgttgcctatcgcgagcgccgaggcaatgaaactgagcgtcttcgccggcaccgc…	MSEAVPAAPLVPMEVDLRGLPFMPLDVVRLLDSDLFALTSGDEFKAALSLWCKAWLQVPAASLPNDDRVLAHLSGAGARWRKVKDMALRGWQLCSDDRLYHPVIAEKALAAWDERVAYRERRGNETERLRRHREEHKRLRDQLRELGFTYPHNTPMETLRAALQDAELNIHRGVSSNAPVRISGPSPEMQPLRLREGEGQGEGYLKDPPLPPEGVAASAAGGQGQSPSKPVRKKRDPAFDPMTAKPDNVSAEVWAKWVQLRKEIRKPLTPTACRQQAEQLARHPNPDAVVLKSVANGWQGLFPDKVERPPATKPSNFTNLPTHAPDQYPEEPEHGPNF
KB-PA_3-chr1	2013330	2014169	+	CDS	Phage DNA helicase loader (ACLAME 19)	atggcccaaatttctaacttcgtccgcgccccggagcgtacccagggccccgacaacgacgccgagtgcgcacagcacggccgctacaccgaggtcagtgtggagcagttcggcggcggaactctcgccagcggctgtccggcctgccacttcgccgccctgcgcactgcccccgtcgacagtgaacagtaccagcgggccttgcaggtccagcagcagcgcaggctgaacgctctgctgatcggatccggcatcactccgcgctttcgcaattccacgttgcagaactttgagactgggggcgacgtgcagatgaccagcgtcttggctcgctgtcgcgacttcgccgagcagtttccggggcactacgaggctggccgttcgctgctgctggtgggc…	MAQISNFVRAPERTQGPDNDAECAQHGRYTEVSVEQFGGGTLASGCPACHFAALRTAPVDSEQYQRALQVQQQRRLNALLIGSGITPRFRNSTLQNFETGGDVQMTSVLARCRDFAEQFPGHYEAGRSLLLVGNVGTGKTHLGSAIVQHVIRAHGAQAVIVSAAQVIRVAKGAMARNAQYTERDVLAELVGFDLLVIDEVGAQGGTEYERGLLHEVIDQRYQQVVPMILISNLPADDSLAMPGAPTLRDFIGERALDRLRQGGRAVRFTWGSARRGVSA
KB-PA_3-chr1	2014166	2015557	+	CDS	Replicative DNA helicase (EC 3.6.1.-)	atgagtcgggaactctacagcctggaggcggaacatggggtgcttggcgccatcctgcaagccggcctgcaggatgaccaggcactgctcgaggacgccatcggtagcgtgaccgtcagcgatttctacttcgaggacaacgctgcgctgttcgaggcgatcaaggcttgttacgaggagggggtgccggtcgatccgctcaccgtcggcatcatccgcgacacgcttcccggcggcgcgaagatcattccctacgccggcgagatcgcccgcaccgttccctcgatcgcgaactggaaggagtacgcccggcacgtccgggagcgcgccatcctgcgccgcttgatcgctgctgcggagtcggtgaaggcctccgccactgatgaccgaccgctgccg…	MSRELYSLEAEHGVLGAILQAGLQDDQALLEDAIGSVTVSDFYFEDNAALFEAIKACYEEGVPVDPLTVGIIRDTLPGGAKIIPYAGEIARTVPSIANWKEYARHVRERAILRRLIAAAESVKASATDDRPLPEIIAGAQQAMADLRDLEDEAPKYKRLDEVMLKVVDVIDDKFNGRAPQWPGTGLVDLDKLVRGIRPRKITVIAGLPGSGKTTLALQIAQHNACEAGEPWLVFSLEMPEEELGVRAIASLGGVDLKRLDDPQQLGDDDWPRITSAVAKAKGAPLFICDDPNVTASQIRSIARRVKREHGLAGIVVDYLGLIPPEAKGRTRSEEVGRTNKALLRLAKELGVPVIELAQLNRDSTKRPGKRPQSSDLRDSGEIEADASCILMVHRDMDSE…
KB-PA_3-chr1	2015554	2016831	+	CDS	Phage integrase	atgacccagcataccctacaggtccgcctctcggacgcggagatccgccgccaggctgccgggcaggtggtgacgctgcgcgatcctcggcaccctgcgctgcggttccgcttccaccgtgatcgtgcgatgggatcgtggttcgtggtgatcggcggcacttggcgcaaggtcggtagctacccggcgctgacgttctcggccctgaccgctgtgctacccgaggtgatcgcccgtctgacggccgatccggcagcgtcgagcgtggccggcggcttggaaaccctggaccaggtgctggagtggcagttggaacgacagttgcgcaatcgcgcactgtcggccaagcgcaaagcgtcggtcaagtcgatgatccggcgccacctggtgccgcggctg…	MTQHTLQVRLSDAEIRRQAAGQVVTLRDPRHPALRFRFHRDRAMGSWFVVIGGTWRKVGSYPALTFSALTAVLPEVIARLTADPAASSVAGGLETLDQVLEWQLERQLRNRALSAKRKASVKSMIRRHLVPRLRGVRVANADKATLDRLLFWPLQEEFSVGYVRQAYGVLMAALRQAHRLDLITDNPMGSMRFTDFVRSKILPRSARLRPEGLSLLLANLQASYREQPEVTLLALLMLCHGTRLGETRTARWRDFALVDAVWTIPADVTKTRTEHQLPLTDQVLSLLRAHRAHQQARGVDSVFLFPGARGQSISANQATLIFSDLSAGDWTSHDLRKLARTCWTEIGIDHLIGEMLLNHVLRGVLAAYIQTQARERKREALERWHAHLDRHGFAAIHGE…
KB-PA_3-chr1	2016846	2017130	+	CDS	FIG00956875: hypothetical protein	atgagcaatgtacaagcgatggcgcctcgcaaggcgatgacacgtgtggagcgcgagttcctcaagctggcgggtcgagaactggcccaagcgaagatcggaggcgcctccgccctggccgccctggtggtcatgatcgccaactggcacggcgaccgcggcaccctgggttttcacgactatggccggctctggttgctggacggcaatgcgaagggcgcggcggtggaaacgctgctgcgcgatctgtttggcctgaacggcacgccgaagggggctgcatga	MSNVQAMAPRKAMTRVEREFLKLAGRELAQAKIGGASALAALVVMIANWHGDRGTLGFHDYGRLWLLDGNAKGAAVETLLRDLFGLNGTPKGAA
KB-PA_3-chr1	2017127	2017684	+	CDS	Phage protein	atgactgggatctaccgcgacgtgatgccggcgatcgttcgcgtcctggcggccgatgccatcgacaacacggcgaagcagagttggcagaggcttatcgaccgaaaggtcgacggcggctttcgggctctgctttctgcccaggaccagttcgagttcgattgcatcctgcacgccctactgcaccgggagctttcgccgggcgagtgggacgtgctgcatgctcgctattcgacgaataacggccgtcgagttcaggcgatagggcgcttggttccgcgcatccagaccccggcgccgcacctgttcttgaccagggccgtctccgcctgggcaattccgaagatgaaggggaaggaggggaagcgctctaccgatgtactgatcctgtccgatgag…	MTGIYRDVMPAIVRVLAADAIDNTAKQSWQRLIDRKVDGGFRALLSAQDQFEFDCILHALLHRELSPGEWDVLHARYSTNNGRRVQAIGRLVPRIQTPAPHLFLTRAVSAWAIPKMKGKEGKRSTDVLILSDEYYDMNQWDTEARPDSTRNRWRREIRKQLDLLEEEALVHVTEILDREKLLEVA
KB-PA_3-chr1	2017786	2018160	+	CDS	hypothetical protein	atgcaaaatttctttcggatgacctttggaggactttcggcgaaatactacttcaggcagttattctttggctcgctatttctagcgttgatagtttttttaagtatatctagccagaaaggaatgaaggttgatcttctggtgctttctctggtttgtacatggctatacccatactctcgcttcgtctatgaaagtgtcataggtttcctgctcggcgagaatatattttatgtgccggcgatctttctgctattcgccaagttgatgacgatggcgatatgctggtcttttgctattttcattgcgccgatagggctcctatacctctactttcatcatcggcgtgctggcggcccgcaagatgagccttga	MQNFFRMTFGGLSAKYYFRQLFFGSLFLALIVFLSISSQKGMKVDLLVLSLVCTWLYPYSRFVYESVIGFLLGENIFYVPAIFLLFAKLMTMAICWSFAIFIAPIGLLYLYFHHRRAGGPQDEP
KB-PA_3-chr1	2018309	2018217	-	CDS	hypothetical protein	atgcaactttcgatcagcggctcactgattttgtcactgaatccacagatatgcaaaacccggcgcaagagccgggtttcggtgctgatctag	MQLSISGSLILSLNPQICKTRRKSRVSVLI
KB-PA_3-chr1	2018511	2018732	+	CDS	hypothetical protein	atgagaagtccagacatcaaggtcgtgaagcttgagggtgatgcgctgccctggtccatacgcgatgccggccatgaggcctgtttcgtggtcatgcatggcctgacgctacggagcgatttcttgttctccgaggaagaggctgaggcagtagcagacgcagtgcacttagagatcatcgaagagatgagatcgatgctggagtctgtccgaggacgataa	MRSPDIKVVKLEGDALPWSIRDAGHEACFVVMHGLTLRSDFLFSEEEAEAVADAVHLEIIEEMRSMLESVRGR
KB-PA_3-chr1	2018859	2019191	+	CDS	Phage holin	atgaagatgcctgacaaacccgacacttgggcggctctgctcgcctggctgagccagcatgcgccgatcatctacgcttccctgctgtcgtgggccatggctatggccaggattatctacggcggcggcactcgccggcaggccctcttggagggcgcgctgtgtggtgggctagcgctgacgatcatcagcggcttcgagttctttggcgtgccgcagagcatggccaccttcatcggtggctggatcggcttcctgggcgtcgagaagatccgtgaccttgccgaccgctacgcagggatcaagctgcctcgtcgagggtctggcgaatga	MKMPDKPDTWAALLAWLSQHAPIIYASLLSWAMAMARIIYGGGTRRQALLEGALCGGLALTIISGFEFFGVPQSMATFIGGWIGFLGVEKIRDLADRYAGIKLPRRGSGE
KB-PA_3-chr1	2019188	2019805	+	CDS	Phage endolysin	atgaagatcaccgccgatcaactcgaccgcgccaccggctgcggtgctgctactgccttgacttgggtcgaacacatcaacggcgccatggcccggttcgagatcaacacgcccgagcgcgtggcgatgttcctggctcaggtcgggcacgaaagccagagcctcaagcgcctggtcgagaacctgaactactcagccgagggcttgctcaagacctggccgaagcggttcacgccggccgaggcgaagcagtacgcccgccagcccgagcgcatcgcgaaccgcgtctatgccaacaggatgggcaatgggtcgccggatacgggcgatgggtatcgataccgtggtcgtggtctgatcatggtcaccggccacgataactacgccgaagtcgcccgc…	MKITADQLDRATGCGAATALTWVEHINGAMARFEINTPERVAMFLAQVGHESQSLKRLVENLNYSAEGLLKTWPKRFTPAEAKQYARQPERIANRVYANRMGNGSPDTGDGYRYRGRGLIMVTGHDNYAEVARALALPLVAQPELLEQRTWAAIASAWWWKSRGLNELADQGRFERITLKINSGYNGADDRAARLEWARAALKGE
KB-PA_3-chr1	2019805	2020044	+	CDS	hypothetical protein	atgctcgggttcacgacgaaagctgaggcgcgacgcatcggcgcctcgcaccacgggagctattacggcattccgatgtggctaggggatgtcgatagcgattgcccgctagcgttcgcaaagtgggcgccgcttgagatggtcgtttccctactctcggtcatcgagggcatcgtgaattccatgctcgaccaagagccgacgttcatgttcaaggttggtcggaggatcgaccagtga	MLGFTTKAEARRIGASHHGSYYGIPMWLGDVDSDCPLAFAKWAPLEMVVSLLSVIEGIVNSMLDQEPTFMFKVGRRIDQ
KB-PA_3-chr1	2020298	2020083	-	CDS	hypothetical protein	gtggcgcgcgccctggacctccagagcttggccgagttggcgggtttgccgttcgatctcagcgacgcgaccgagttggcgttgctgttcagcgagaacgccggcctgcaggtcgatcatctgctgattacggtcacgctcggtctcagcagcttcggcgcggcgttgctcagctttgcgatcctgtgccaggtgatccatacgccagaacactag	MARALDLQSLAELAGLPFDLSDATELALLFSENAGLQVDHLLITVTLGLSSFGAALLSFAILCQVIHTPEH
KB-PA_3-chr1	2020587	2021324	+	CDS	hypothetical protein	atgagaggcagtatctccgcccgagatctcgatgatgcggtggcgtctctacgggtcctctgtggcgacctgccgaacaaagtgttggccgacgccttgaaccacaccgcgaaccaggcgaatcaggccctggtcggggagatcgaccaggtcttcgaccggccgacaccgttcacccgtaacgccatccgcatcctgcatgccacctcacgccggcttgaggcggccttgtgggtgaaggacgaaaaggaccatgcctcgaaggggcagtcgccggagggctgggtagctccccaggtcttcggagggccgagggtggacaaggcgtcggagcggaacctccgggcccggggcatcctgccggcgggcatgttcgtggttccagcggagggcgcccgg…	MRGSISARDLDDAVASLRVLCGDLPNKVLADALNHTANQANQALVGEIDQVFDRPTPFTRNAIRILHATSRRLEAALWVKDEKDHASKGQSPEGWVAPQVFGGPRVDKASERNLRARGILPAGMFVVPAEGARLDQYGNMSRGQMIQILSGLGALEYRAGFKGNATQSARSLAKGHQLAYFVMRRGRRPIGIAERRGRTLTMVLAFVRQPQYRVRFQFHEVVRRVAEDDARLEANIERALAKALR
KB-PA_3-chr1	2021538	2022083	+	CDS	Phage DNA packaging protein	atgagcacagaagacctccagaaaaagcgcggctggctgaacaagtcggaaatggccgcgagcctcggtatttcacctcaagcctttgaccgatggggggttgcccctgtctccaaggttggccgcgaggtgttctacaccgcagaggcggtgctacggaaccgactcgagcaccaggctcggaaacaacaaccagcggggatggatgccgagggtattgatccgctggccgaacagaagctggtacaggagcgtttgcggctgacggcggcgcaggcgtatgcgcaagagcagaagaaccaggtcaatgacaagcagttggcgccggctgatttcgccattttcgcgctgagtaagctggctgcgcagatcggctcgatccttgacaccgtgccgctg…	MSTEDLQKKRGWLNKSEMAASLGISPQAFDRWGVAPVSKVGREVFYTAEAVLRNRLEHQARKQQPAGMDAEGIDPLAEQKLVQERLRLTAAQAYAQEQKNQVNDKQLAPADFAIFALSKLAAQIGSILDTVPLKIRRRHPDLEARHIESLQREVALARNTAAELGEQLPELLDEYLSTLDG
KB-PA_3-chr1	2022112	2023995	+	CDS	Phage head, terminase DNA packaging protein A	atggcgctctacaaggagccgccgaagacgccggtggagtgggccaacgagcacttctacctgtctagcgaatcgtcctatcaggagggacgctgggagacgttaccgttccaggtagcgatcctgaacgcgatgggtaacgacgagatccgtacggtcaacgtgctcaagtcggcacgggtcggatacagcaagatgctgctggtggcggcggcctaccagatcgagcacaagcggcggaacatcctgttcctggtgcccagcgatgcgagtgccgccgagttcatgaagtcccagatcgagaccatggtgcgggacgtaccgccattgcgagatttggcgccgtggtatggcaaggcgaaccaccgtgacagcacgttgaacctgaagcgcttcagc…	MALYKEPPKTPVEWANEHFYLSSESSYQEGRWETLPFQVAILNAMGNDEIRTVNVLKSARVGYSKMLLVAAAYQIEHKRRNILFLVPSDASAAEFMKSQIETMVRDVPPLRDLAPWYGKANHRDSTLNLKRFSHGKQLWCRGGKAAKNYRELSADTVIYDELAAFDSDVEKEGSPLFLGDKRIEGSTFPKSIRGSTPKIHGPVDEGGCQMEAAANASPHLMRLHVPCPHCGAEQALKWGGKDCAFGIKWDGDNPSAAWYVCEANGCVVQQHEMQAQQSKGRWICERTGIWTRDSQDFFDADGETIPVPDSLSFHVWTAYSPFVSWGRIVLDFLQAKKDVNGLKTWTNTTLGETWVEDQGDKIEWELLYGRREVWNHLPSRVVALTGFIDTQDDRYEARI…
KB-PA_3-chr1	2024011	2024235	+	CDS	hypothetical protein	atgaccgaagcgcagcaacggttggcggatgtgcgcgcggccatccatgacattctcaccaaggggcaggccatcaccaaggatggtcgcaagctcgagcgcgcgcagttggcgagtctgcggatgctggaaagccagtacgtggcagatgtggggctggaggcggcgctcagtggtcgacgctcccgagtatgccggttgtaccctgccgggaagggggtgtga	MTEAQQRLADVRAAIHDILTKGQAITKDGRKLERAQLASLRMLESQYVADVGLEAALSGRRSRVCRLYPAGKGV
KB-PA_3-chr1	2024235	2025710	+	CDS	Phage head, portal protein B	atggccaggtatccccaactgacccgggcgggcttcatgcttccggaccggattaagaacagctatgacggtgccggaacaggccgccgcgcgcagaactgggatgcgccgccgggctcgatcaataccttgtcgctccctgcactgccactgctacgcaagcgctcccgagctgcgacgcgaaacgacccctacgcgggtggtgcgatcgacacacgggtgagcaacctcattggttccggcatcgtgccaatgccgacgattcaggacaagacgctgcggcggttgttgctggagctctggctggactggaccgacgagtcggatgccgacgagcggaccgacttctatggacagcaggcactggcggcgcgaatggtcgaggagagcggcgagtgc…	MARYPQLTRAGFMLPDRIKNSYDGAGTGRRAQNWDAPPGSINTLSLPALPLLRKRSRAATRNDPYAGGAIDTRVSNLIGSGIVPMPTIQDKTLRRLLLELWLDWTDESDADERTDFYGQQALAARMVEESGECFIRLRPRRPEDDLAVPLQLQLLPAEFVPVEKNEVARNGNLIRAGIEFNALGKRVAYWMYRRHPGDSAVMAAGYNQLVRVPASEVLHVFEPLEAGQLRGVPRLSRVLLRLRSLDNFDDAVLFRQEVANLFAGFITRPSPGDLPPIDPINGGPVRMDGDGFTPMVGLEPGTMQELLPGEQVEFSKPPEAGNNYPDFMRQQLQAAAMGTGVPYELFTGDLRNVNDRVIRVVLNEFRRRLEQLQFSVYIHQLCRPVRAAWMDMAYLSGAL…
KB-PA_3-chr1	2025707	2026903	+	CDS	Prophage Clp protease-like protein	atgaccgaacaatcagcgcttcgtgcgcaggcgcttgcactcggcctgcacattttcaacaaggtcccggatgtaccggcgccccaggacgagacctggtaccgcatcaaggctgcagccgagggtgagccggaccaggccatcgaggtctacatctacggtgagattggtacttgggggatcacggccaaccagtttatccaggacctgaaggccgtcgacgatggttcttcgccagtgctggtggctttcaactccattggtggcgacctattcgacggactggcgatccacaacgtgctcaaccgcctgggcgagcgctgtaccgcccgcatcgatgcactggcggcgagtgcggcaagcgtggcggcctgcggcgcgcatcggttggagatggct…	MTEQSALRAQALALGLHIFNKVPDVPAPQDETWYRIKAAAEGEPDQAIEVYIYGEIGTWGITANQFIQDLKAVDDGSSPVLVAFNSIGGDLFDGLAIHNVLNRLGERCTARIDALAASAASVAACGAHRLEMASNSMLMIHNPWTWAGGDADDLRKVAEVLDQTLEAIVASYKRKAPEIDDGELRQMIKDETWLTASEAKTLGLCDEVLDGVAVKAVVGDGGVLRKYRNTPQTLLAQLDKPPLSDTPAPTEGPVPEHDPEPPVTQPTAAALAARIIRSCSEAGISNLVEALTVSGDLKDEASVDAAVNRAKAVRDLCVSARLPELAADYVKAGLEPDAVRARLFDKLAGNGFGEIINTPPLEDDPTPPSKARAATPSKVYAARRAAQTAKPKASKGEA
KB-PA_3-chr1	2026903	2027262	+	CDS	hypothetical protein	atgaccaaaaccgaaggctttcacgccggtgagttcctcctctcggagggggccggttccatttcccgcgaacaggtgaccctggccgctaccgcgaaggccctgccagccggccaggtgctgggtatcgtcacggcgtcgggccaatacgcgccctacgacgatgcggccacagatggcaccgaggtggcggtggcgatcctgtatgcgcccaagccggcctcgcccgatcctcaggcggtgaccgtgattgctcgtctggccgaggtgatcgatgtggcgctgactggtttgaacgacgctgcccgtggcgacctcaaggcccgcaacctcattgtccgcaccggtacgccgtactga	MTKTEGFHAGEFLLSEGAGSISREQVTLAATAKALPAGQVLGIVTASGQYAPYDDAATDGTEVAVAILYAPKPASPDPQAVTVIARLAEVIDVALTGLNDAARGDLKARNLIVRTGTPY
KB-PA_3-chr1	2027329	2028324	+	CDS	Phage head, major capsid protein E	atggctgacatcaacgtcttcgaagacgaggcgttcagcgtctcgtccctcaccgctgcgatcaacgaagcccccgaggtgcctggccgtctggcggctctgggtctcttcgaggaagagggtagcaccaccatcacccagcagatcgagaaggacggcgataccttgcacctggtgccggccgccgatcgtggcgcgccgggcctggtggtcaccggcagcaagcgcgtgctgattccgttcaacaacgtgcacctgccgcagaccttcaccatcctcgccgacgagatccaaggcatccgtgccttcggcgagcaaaccgagctgcaggccgtgcaggacgtggtgaacaagcgtctgggcaagatgcgtcgtcagctcgacgccactcacgagcac…	MADINVFEDEAFSVSSLTAAINEAPEVPGRLAALGLFEEEGSTTITQQIEKDGDTLHLVPAADRGAPGLVVTGSKRVLIPFNNVHLPQTFTILADEIQGIRAFGEQTELQAVQDVVNKRLGKMRRQLDATHEHQRMGAVLGTILDADGSTVLLDLYDRFGISAQVVQMELGSATTKVRLKAGEALDAQEDALGNIPSSGSRALCGKNFWNALITHKSVEETYLNTMQASQLRGDAREEFEFGGVIWERYRGKVGGRSFIPDDEARLVPIGVPELFLSIFAPANYMETVNTLGLPYYAKQEVMPFNKGVAGEAQSNPLHICTRPRAVIKLVK
KB-PA_3-chr1	2028324	2028635	+	CDS	FIG00953150: hypothetical protein	gtggctggctttgtccaattggtcgccgacatggacgagatcatcgccgacgtcctcggcgatggtgagtttggctacctggaccgttctggccggcaggtcggcaatgctgcggtgatcgtcgaggaaggcgtggaacgcatggaagccggcgccttggatcggtaccggaccattgcgtgccgcaaggcgttcttacagccgcttgatcgcaagggggcgttcctcgattccgatggccaggtctggcgcatcgacggcatccatgccgacgacggcgactggatcactttctacgtggtgcccgaatga	MAGFVQLVADMDEIIADVLGDGEFGYLDRSGRQVGNAAVIVEEGVERMEAGALDRYRTIACRKAFLQPLDRKGAFLDSDGQVWRIDGIHADDGDWITFYVVPE
KB-PA_3-chr1	2028632	2029069	+	CDS	hypothetical protein	atgagcgacgtgatcgatgtacagaccgcagtcatcggccaactgctggacctgctggccgcggtgccggcgttcggcgacgccgtccgcgaggactgggtggccggggtgctcgacgccgaggacagcgacgagcccgaacggctgatcatcctgcaggaaggagacaccgtggaacgagaccggtcgccgggcagtgtcgtggaggagtggaccgtgaacatcgtcccgatggcgcgcggcagggacgccgcccaggcgttgcgcgaggcgcgcctggcgatcaagcgggtgctcaagggccacaaggccgggctgacggtgcccggcctggtgcgtgtcgattttccggcatccgctgtgcgcctgcccgagcccggccggcgctgggcctatcga…	MSDVIDVQTAVIGQLLDLLAAVPAFGDAVREDWVAGVLDAEDSDEPERLIILQEGDTVERDRSPGSVVEEWTVNIVPMARGRDAAQALREARLAIKRVLKGHKAGLTVPGLVRVDFPASAVRLPEPGRRWAYRAIPLQVSYSQQL
KB-PA_3-chr1	2029120	2029323	+	CDS	hypothetical protein	atgcccgagatcatcgttaccaggccgttcaactaccgcgaggggctcgacgcgacccactacccggcgtcgaagggcgccatcagcgttaccgccgccgtagctgcccatgccctgggcaagggctacgccaccgaggccaaggccaaggcgccgccgattccggcagcctccgccgaaccggccggtggcgaccacaagtaa	MPEIIVTRPFNYREGLDATHYPASKGAISVTAAVAAHALGKGYATEAKAKAPPIPAASAEPAGGDHK
KB-PA_3-chr1	2029351	2030103	+	CDS	hypothetical protein	atgctccagaccatcgaccgctcgttcatcggcgagggcatcatccatgcccgcctgtacgggtcgcaggaaccgttcctgccgctcggcaactgcgacaccttcaacatcagcttcgccaccgaccgcaagacgctgcccaactacatgggcggcggcggcaacagtaacgtccgcgagcgcgtcaccgacgtgacgtcctccatcggtatgttcgacctgactgccgagaatgtcgccctggtgacgcgctccaccatccaggtggcgcccaccgccgcaatcaccgacgaggcgcatacctctcagggggttgcgctggagttgatcccgttcaagtacctgccggacctgaccaagcccgtgacggtcaagaccgcaggggacgtcgaggtggcc…	MLQTIDRSFIGEGIIHARLYGSQEPFLPLGNCDTFNISFATDRKTLPNYMGGGGNSNVRERVTDVTSSIGMFDLTAENVALVTRSTIQVAPTAAITDEAHTSQGVALELIPFKYLPDLTKPVTVKTAGDVEVAPGTDYLLVPHGIQVLSGGKIDATGIKVSYTPRPSRAVHMLNGSQKELELFIAGLNDAQSGEPFALRPRRVKFGLLQELAVLGQEYAKLTGPAELLADSRVTATDISKFCQMDLAQAA
KB-PA_3-chr1	2030174	2033446	+	CDS	hypothetical protein	atggcgaacccaatgcagcgcctgatccagttcgttcttcgcggccgggacgaactgtcgcccgccgcccagcagtcgaccgaggcgctggaagggctgcgcaccacggcggcgaacctgaaccggcagttggacgatgcgaagggggcccgcggcctggtgaccgcgctcggaactaccgagcgcgccattgcgcagacccagacgtcggtgcagcgggtggaccgtaccattgcggacctgcgcgaggcgttggaccgcaaccccgggagccggggcctggccgtgtccctgcagatcgcggagcgggacgcagcgggtctgcgtcggacccttgaccaactgaccgctcggcacgctgagcagcaacgtgcggtgcgggcggcgggcgtggatacc…	MANPMQRLIQFVLRGRDELSPAAQQSTEALEGLRTTAANLNRQLDDAKGARGLVTALGTTERAIAQTQTSVQRVDRTIADLREALDRNPGSRGLAVSLQIAERDAAGLRRTLDQLTARHAEQQRAVRAAGVDTGQLANEERRLASVVDNTRESIAQNSREIRELERAQMRAAREAAGHTSRVTALREAMSSGVRQAAAYAAAFVGIQAALNLVRRGIGLVRDGIVSMLTTGDQFENLQNRLTSLMGSVAEGERATAWIKTFAKDTPLQLGDVTDAFALLKAYGLDPMDGSLKAIEDQSEKLGGGMERLEGITTAVGQAWAKQKLQTEEILQLVERGVPVWDMLAKVTGKNAAQLQDLASKGKLGRDVIKALVDEMGRSSEGAAAKAMSTLTGLVSNLGD…
KB-PA_3-chr1	2033443	2033853	+	CDS	hypothetical protein	atgaggctcgatgcggtggaactgggcgaccagttcgagtgggtggacgagttcacctgggatgcggtggcacaagagcaggaacgctccctgaccggcgcgctgttggtgcaggaaggcaccaagctgcatggacgcccgatcacactgcgttccgggggaggggtatggacgccgctgtgggtcgtgcggcagttggaggtgctgcgcgaccagcgcctgcgggtcatgccgctagtgctgccagacggccgcgaattctcggtgatcttcaaccgcgccgacggggcgccgctggaagccgaaccgctgttccgcgaggtcaaccccggtccggacgccgactacctggtgacgttgcgactgctcaccgtagcgccgccctcggcaccgcccacc…	MRLDAVELGDQFEWVDEFTWDAVAQEQERSLTGALLVQEGTKLHGRPITLRSGGGVWTPLWVVRQLEVLRDQRLRVMPLVLPDGREFSVIFNRADGAPLEAEPLFREVNPGPDADYLVTLRLLTVAPPSAPPTPDP
KB-PA_3-chr1	2033902	2037453	+	CDS	hypothetical protein	atgacgatcaccgtcgatgatgtaaagctgctgaaatcccagcgcctcaccgatgaggacgacggcggcggccgtgccaccgggcaggccgtggtggatcgcgagatcaacaacctgtttcccgatatctcgcgcctggaccggaccatcggccggatcaacctgcgcaaggccttcgccggcatcagctcgaacagcgccgagccgtacctgggcgctcatgccatcgtcacgcgggcgccggccgatccgcgtgtctcggtgctgctgttcaacaccggcagccagaccgatgagcgccgcgacgcgcgcaacgccatcgagtccttcgtggtgccggccgtgtctgcctcgttcgaactgctgggcaaccagttgcagggccagcgcgccatcgct…	MTITVDDVKLLKSQRLTDEDDGGGRATGQAVVDREINNLFPDISRLDRTIGRINLRKAFAGISSNSAEPYLGAHAIVTRAPADPRVSVLLFNTGSQTDERRDARNAIESFVVPAVSASFELLGNQLQGQRAIACVQREEQRLPEIGEVYQLVFESRSQYVRITDVEARLEQFAHDYGNGNFVNFTRRRLDLSISAPLGATFPGGQVTPGGTTSPKSQVLSTQVADAARYYGISPLAEAVSRGALSLRVKSVYSQLVPSTTRENALVDQLAGYQRRLFAAAGPARTVNLNVANIGSGRSRTFLGTGCAPGSLSLSAGGGVFADDRKGGLRYISGSNWIASGTVDYESGAIEMAASGSGWSGTASATYQPAAAATGEAVTGEIPIELGNRGFVYTLSLSEA…
KB-PA_3-chr1	2037453	2038460	+	CDS	hypothetical protein	atgaccgctcgacagtacagctatcgggacgccggcgcaccaccggcgctcttcccgtcggcggtgacgccgttccagaagctcaagagctacctgcgcgcggcgctggtcgatggctacggcaacaagccaccggcagggtggaccgtggtaagcgagttcgacactgccatcaccctggctccggcgtccaactgtgcacagatcacgttctgccagcacttgccaagtagtagcggtagcagctaccgggacttcgtcgggatctttgtacatgagggcatgctggatatcagcactccgcttccaaagggggtcaacacgcgatcacgtacgtggtcggcggataccaaccccaccagcaatgatgcccatatcctctatctgggctacatgtac…	MTARQYSYRDAGAPPALFPSAVTPFQKLKSYLRAALVDGYGNKPPAGWTVVSEFDTAITLAPASNCAQITFCQHLPSSSGSSYRDFVGIFVHEGMLDISTPLPKGVNTRSRTWSADTNPTSNDAHILYLGYMYWNYATYWQICADAETFVFCMLADRGYENTSEDYSLGLYVGQYESFSGASGVQGFIAVGGAQGYQSSASRSTNRSFGSGFSSLRDQRSGEIIQGGGAALGALMDQMQYQSMYYDRPEGENPPYWRMQQPYVANGANYVGLLKGVCFDPILGHYRHGHLLDRLGLPLAATSVAEAVQMDGKTYYVDMDRWGLWFLSVDPAWWPA
KB-PA_3-chr1	2038457	2039317	+	CDS	hypothetical protein	atgagcgggctgatgctgcaggtggtgccgccggtacaggtcaggcccggcacctggctgcagcgcttcggcattgggccgaagtcgctgcgcccgcctgtggaggtcgcctggtcgggggccaggcaggcgatctaccagaccctcgccgtgaaggtcacccgtgaaggggaggagacctcggcgcgcaagatcgccacgctgtatcgcggggcggttgtcaccgcgactgcaatgacggcgtctttccaggtctacgagggcgagacggtgcagcgcttcgaggcatcgggcctgcgcggacagttcgtgatccaggtcaccgacgaaggcgacccgcgcctggggatcattcgctggccggtcctcgatgccgatacgcgcctgctgtcctatgac…	MSGLMLQVVPPVQVRPGTWLQRFGIGPKSLRPPVEVAWSGARQAIYQTLAVKVTREGEETSARKIATLYRGAVVTATAMTASFQVYEGETVQRFEASGLRGQFVIQVTDEGDPRLGIIRWPVLDADTRLLSYDLTEGSGGRDPTDPAKVRAVVTVDGGAASRQVVVIERKLDGEWRVAGVGQTAESGRAEIALEVTAGGTTYAMGLDDWGAVFEPRLAVSLGQRVRPTIFSGWLYEVTEAGVLPAAEPEWWPIEGDNPSRQVGTARLQATRYYRPLSHGPFPVEAL
KB-PA_3-chr1	2039314	2041074	+	CDS	hypothetical protein	atgatcaatgcgagtttcggcgccccctggcagagggcggcgccgctttccgtgcgcgccgtcccgctgcgctggcagcgcctggtgtttgccgatgcgcgtagcggcgggctgtggggctctggccgaccactggcacggcgttgcgccagtggctggtccggtgtaccggtgcgtgatgcgggctgggggagtggctgggagcacgccgagcagcgcaacgcggcagcccgcagcgcttgggacagcacccgggtgctggacgtggagagagagctaggctgggatcggacgctgcgcccgcgtgatcggcgcctgtcgctgatctacaacccgcgcccgtcgcccaaggacgccggccgtccgcccggctggcggcgctcggccgagttcgaccgc…	MINASFGAPWQRAAPLSVRAVPLRWQRLVFADARSGGLWGSGRPLARRCASGWSGVPVRDAGWGSGWEHAEQRNAAARSAWDSTRVLDVERELGWDRTLRPRDRRLSLIYNPRPSPKDAGRPPGWRRSAEFDRFRDALSERRASLYIPTGLLDFNFGPTRYTPANTPDVFFDFRYVAPVRGIRPVDAGARSSYGSPTRFDALRRIPWAWGRPTDPVPTGIVYPDYPGPVVPIDPPTEPEILETYMIGNTVTLVVLPSRTPLDATSIRIGLDIDSFAWSFSADLFGRTSLDLAAPDANGPKTVELEINGWIWRFLVERYSGSGKHPSERYTISGASRTQLLDAPYAPKRSAVNTAPLNARQVVDDQLQYTGFSVSWDVENMGPPDWTLPAGAFSYQDQTP…
KB-PA_3-chr1	2040762	2041320	+	repeat	repeat region	taccgccggcgaggagtcggcgcccgacgtcatggaggactggatgaccggcaccgaggtggcgcgctcgcgcgggatctgcgagctgtcgaagggcggtaaccaggcgatcgagacgcgccgtatcccgctgttccagaaggatgatggggtaccgggcctggtgcagccgggaatgctggtcgaggtgagggacgaacaggcgacgtggcgcggtctctgcctggctaccgatatctcggccgagggggtaggggctagccgcgtttggcagaccctgcgcatcgagcgccactatccgggaggttcctgatggcgacggtcaacccctggcgtcggttcatcgggctcttaccgggcggcgcgcgcacggtgggggaggtgatcgatgtcgacgag…
KB-PA_3-chr1	2041074	2041310	+	CDS	hypothetical protein	atggcgacggtcaacccctggcgtcggttcatcgggctcttaccgggcggcgcgcgcacggtgggggaggtgatcgatgtcgacgagggcgccggcacctgccgcgtccgcctgcgaaacaacgtcgtgatcgcggctcggggcacggcggtgccggccgggcagatggcgttcatcagcgatggcatggtgaccggcccggcgccgcagctcccccagttcgatatcgaggtttga	MATVNPWRRFIGLLPGGARTVGEVIDVDEGAGTCRVRLRNNVVIAARGTAVPAGQMAFISDGMVTGPAPQLPQFDIEV
KB-PA_3-chr1	2041841	2041515	-	CDS	hypothetical protein	atgaaaaccaaaattgaattttatataatagatttcaaatacaaaatctctaccaatgaagctactttccatggagagaatcgaatcgccttcccctcagccgtaataccagaaaatttttctgaagacggattccagaaaagagtctcagaaatcctgaacagcaaagcactcgaactgctgcctcaaatttttattgagcacaacatcaagaccaacgacagtagtgcaatctcccttgaccttgaagtagttaaatcaacaaaaatcagcacctctgtttcaaccgccatctcacaacaactatccgaaacccctaaagaataa	MKTKIEFYIIDFKYKISTNEATFHGENRIAFPSAVIPENFSEDGFQKRVSEILNSKALELLPQIFIEHNIKTNDSSAISLDLEVVKSTKISTSVSTAISQQLSETPKE
KB-PA_3-chr1	2043132	2042260	-	CDS	hypothetical protein	atgaaatctagattaaacgtactagctctaggtttgatcttcgcggcaagctcagcacttgccggcaatattgtccctcgcggccttaacagcgttggtaaacttgccgagtcccctaatggagtctaccgcctagagcttaccaatacaggcgaccttgccatctttgataaaaacaacaagttcatctggcgagctgacgagtccacagggattgttgggaagatgacaggtgatggctgccgacatgacggatggagaatgcaggtccatgagggcatcagcatcgaagatcgcaaagggtgttttaaatacctaaacaagatagatagcaacctgcctgcgaatgctggtgattacaccaactatgttttgcaggatgacggcaacttcgtcgcg…	MKSRLNVLALGLIFAASSALAGNIVPRGLNSVGKLAESPNGVYRLELTNTGDLAIFDKNNKFIWRADESTGIVGKMTGDGCRHDGWRMQVHEGISIEDRKGCFKYLNKIDSNLPANAGDYTNYVLQDDGNFVAYLTNIRWKTGAYRAAAAGATQSVIIPPGTVMPRGTVYVNGNYSFRFQTDGNLVVYDGSTPIYNAELDGKGGVKAQMQYDGNFVVYDVNDNAIWHTHTDGNQNAYMAFQPDGHLLIVKQDVIWARFGHQSTYWAPAKPGSPFFIPLGWLIPDSVSNWL
KB-PA_3-chr1	2043466	2043690	+	CDS	Phage protein	atggacgagatgttgcggcgtaggctccgggcggagttactggaggtggggttcctcaaccagtgttgccttgacctgatggaaagcatggaggctgagttcagcctcactgatgaccagcgcgagtgcatcgagcagctcagccgatttctgcaggaagggatcggcaagctgacatctctgtccgagcgtgtggcggctggcgatattgtcgtgctttgttga	MDEMLRRRLRAELLEVGFLNQCCLDLMESMEAEFSLTDDQRECIEQLSRFLQEGIGKLTSLSERVAAGDIVVLC
Additonal Region 11
KB-PA_3-chr1	2136536	2137069	+	CDS	hypothetical protein	atgtccagcgcacctacgcgcctggatcacgccgccctgcgtgaaaccctgcggcagttgttcgacctgcccgccggcggcgtcgtcgacgccgaccaggcgctggcgccgccggctaccccctatgtgagcctgcgcctggaaacctcgaatctgcttggcaacgtgcgccgggagttttccgccgccagcgagcaggaatccctgctggccagttgcgaaagcatctttcgcctgacctggcatggccccgaggcgcaccagcgcctgcaggacgcccgctgcctgctgcagtcgagcgccaccatcgatgccctgcgtgagctgaaggccagtctgctgcgcctgacgccggtggagaacctctccgccgcgacgggcggccagacgctcggacag…	MSSAPTRLDHAALRETLRQLFDLPAGGVVDADQALAPPATPYVSLRLETSNLLGNVRREFSAASEQESLLASCESIFRLTWHGPEAHQRLQDARCLLQSSATIDALRELKASLLRLTPVENLSAATGGQTLGQARFDLVIGHEHVLVVDLKRIALATLQAHGSSGLSAAVTVQSSET
KB-PA_3-chr1	2137071	2138570	+	CDS	Phage protein	atgtcgctccccctttcccagatcgtcaacgttcagctgaacgtcaccccggtatcttcgccgcgccgtgacttcggcctgttcgccctgttcaccccggaagccggcaacgctttcgtcgatgcttccaccctgtacatcaattgcgccagccaggcggatgtcgaagcggcgttcggcagccagtcggaaaccgctgccgccagccgcccgttcttcgcccagtcgccgcgtccgcggcagatgatcgtggcgcgctggctgaagagcgcgcgcgcgctgccggcgctcaaggcggcgttggccggcgccccgctcagcgccggcctggcgcagttcaaggctatcgccgacggccagctgtcgctcagcgtcgacggtgtgcgcgtggatgtcgcc…	MSLPLSQIVNVQLNVTPVSSPRRDFGLFALFTPEAGNAFVDASTLYINCASQADVEAAFGSQSETAAASRPFFAQSPRPRQMIVARWLKSARALPALKAALAGAPLSAGLAQFKAIADGQLSLSVDGVRVDVAGLDFSEAADLPAVAATIKAKLGAQALDCRYDEVAGRFILEASAAGSGKSIGYAENRMLPGTYLGALLRLEDGMARKIAGRDTLDLPAQSLGEAFAALTDVNPGWYAASVAAALSDAQILEASAWVLAADKKIFAVTTQNAAHLEAVAGNPFQQLRDRQSYRTVAVYDKNDAYAANSWLARALAVNFAANNSTLTMKFKQLPGISADSLTLSEADKCRALGINFYTYFDDSAMVAEGTVVGGRFFDEVHILDWYVDAVQKEVFATLY…
KB-PA_3-chr1	2138641	2139072	+	CDS	Phage protein (ACLAME 264)	atggctatttacgaccacaaccaactgtccgtgctgctcaacggctacgagatcaaggactgggccgacggcgccgacacggtcaagttcgccttcgccaaggacgccggcgagatgctgatcggcgccgatggcggcggcgtgttcgtcgccagcaccgatcgctcgggcaagctgaccctgaaggtcaggcagcattccgaggacaacaagtacctaaaccgcctgcgcgccctgcaggacggcaacatcaaggccttcgtgccgctgaccctggagatccgcgacctgctcaacgaagacctggtcagcgcgaccaagggctacttcaccacacgtccggaatacacccgtggcgccggccacaacgccactacctggaccatcgtcttcgagcgc…	MAIYDHNQLSVLLNGYEIKDWADGADTVKFAFAKDAGEMLIGADGGGVFVASTDRSGKLTLKVRQHSEDNKYLNRLRALQDGNIKAFVPLTLEIRDLLNEDLVSATKGYFTTRPEYTRGAGHNATTWTIVFERASVNLEKGVA
KB-PA_3-chr1	2139075	2139473	+	CDS	hypothetical protein	atgaaccaggagcatcgcctcaccctcgaccaggtcacctacctgatgcgcccggccaacgcgctgccggcctggaacgccctgaagaaggccgcgcgcctgctgcaggggttggagctgggcgagggcagcgagtctgcggcgctcggcgcgatcctcggcaatctcggcgacccggtggtggccgaggtggagcagttggtcctgcagcacatcaacgtgcagccgcaggacggccaggcattccgcctggtggatcgcctggatacgcacttcaaccagcatcgcgcgcacctgctgccgctgctcatcgagggcgtgaagtaccagttcgcggattttttcggcgccgccatgccggcgctggcgaaggtcctgccggtccaggcgcaggcctga	MNQEHRLTLDQVTYLMRPANALPAWNALKKAARLLQGLELGEGSESAALGAILGNLGDPVVAEVEQLVLQHINVQPQDGQAFRLVDRLDTHFNQHRAHLLPLLIEGVKYQFADFFGAAMPALAKVLPVQAQA
KB-PA_3-chr1	2139500	2139637	+	CDS	hypothetical protein	atgcgccagctctgcacgctgcacgagctgcgcgcgctctacaccctggccgacctgtgcgacttccacgacgccctcagcgagtgggacgaagcccagcggcaggcctacgagagaccgcatcatggagtcgactaa	MRQLCTLHELRALYTLADLCDFHDALSEWDEAQRQAYERPHHGVD
KB-PA_3-chr1	2139624	2141498	+	CDS	hypothetical protein	atggagtcgactaatcaaccgaccgccggacaggccaaggccttgcaggaataccttcgggagttccgcgaggcgctgggccaggtccagtcggtcgccaggaccgtgcagggaacggtggctgctctgctcggggggctgaccggctacctcgacgactcgctgaaggggctggaggacctcgaggagggtgaagacgcgctggggccgatcggtcccgacgcgatccgttccgcgcaggactatcgccaggcggtgcaggacgtcgatgcgctggtcgaggcgctgaacctccgcgtcgccctagggctggcaccgaccatcggcaacctcgcggagcgcttcgagcgcttcgtgcaaggcaaccgcgaggcgctgctcgaaggggtgggaaaggcg…	MESTNQPTAGQAKALQEYLREFREALGQVQSVARTVQGTVAALLGGLTGYLDDSLKGLEDLEEGEDALGPIGPDAIRSAQDYRQAVQDVDALVEALNLRVALGLAPTIGNLAERFERFVQGNREALLEGVGKALEVIAQAIDALGNFVWALDEVVGATLGWRTTLTLLGGTLLWLGRTALLAFASNPFSLVIAALAVLILLVDDFVTYLRGGDSLFGGFWGGLRDAVAGVSAFIEENLQGVLAVATFVGTALLTAVPRSSWGAGLARLLLGANLAIGGLLGGIGRFGAALRGVVTVIGLLGNALRIAFLANPVGLLIAAVVTLAVLVALNFERIKAVAAAAWDFIVAKAVAVFVALQELFAPLLQWYGNLFGLVGDLLGGNFSAALERVRALWEQVLGF…
KB-PA_3-chr1	2141508	2142251	+	CDS	hypothetical protein	atggtcatgctgatcaatcgccatgtcggtaccgtgcgtctggacgcggtgatttccgaaaaccacgtgtctacgttgaagaccaccgccaacccggtggagtcgggagcgcaggtgatcgaccatgcggtgctcgaaccgaagacgatcactatcaccgggaccctggtggatcacgcgccacccggagaaccgctgccttccctgttggcggccggggctcgccgcgcgccggactttctcgaccaggtggcgccggccggtgctcccggttcgctcaccgaacaggcccggcgctatgccgcccgccagttgcaaagttggctggcgcccaccggccgtcgcgcggccgaggaactcgcggcctggctaccgagcctggcgccgccgtcgatcggc…	MVMLINRHVGTVRLDAVISENHVSTLKTTANPVESGAQVIDHAVLEPKTITITGTLVDHAPPGEPLPSLLAAGARRAPDFLDQVAPAGAPGSLTEQARRYAARQLQSWLAPTGRRAAEELAAWLPSLAPPSIGDLSLSCQRVQQIHSSLLDLQKSGEPLDIQTGFHLYRNMLLTSISAEQVVDGALKLTIAARELHLVETRTMRVPSAGRSGSGRAARQAAPRQARGATRPEPADKSLLKSIAGLFK
KB-PA_3-chr1	2142248	2142565	+	CDS	hypothetical protein	atgaacctgttgccgatcgacgacagtccattgcaggagcagcgtttcgagttcgccggccagcgcctgcgcctgaccctgcgctacaacagcgtcggcgaccactggggactggacctgttcgacgagcgctcccaggcctggatcgcccaggggttggcgctggtggtcggggtaccgatgctctggcgcagcagcgtgccgtactacttctggctcaccgacgagagcggtgccggtctcgaccccatcggcgggcaggacctcggtagccgttgccggttgtacatcggcgagaaatcggaggtggcgccatga	MNLLPIDDSPLQEQRFEFAGQRLRLTLRYNSVGDHWGLDLFDERSQAWIAQGLALVVGVPMLWRSSVPYYFWLTDESGAGLDPIGGQDLGSRCRLYIGEKSEVAP
KB-PA_3-chr1	2142562	2143404	+	CDS	hypothetical protein	atgagactttacggccggcgctaccggctggagctgagcaaggtcgacgaatacctggtggtggaaaagctgcggatcgccttcgaactgaccaagagtgccgacagcgcgccgaacgagatcaaggtgagtatctggaacctgtcgcgcgagcggatcgaccagttgctgcgcggcgatttccagtccgcgcggctgtgggccggctacgaggaactgcgcctgctgttccttgccgacatcatcaaggtcggcgtcaaacgcgagggcctggactggatcgtcgagctggagtgcggtgatggtgatcgcgattatcaccagtcctatgtcagccagaccttgtccgccggaacctcccgcgagcagatggtcggtgtggccctggcgagcatgccg…	MRLYGRRYRLELSKVDEYLVVEKLRIAFELTKSADSAPNEIKVSIWNLSRERIDQLLRGDFQSARLWAGYEELRLLFLADIIKVGVKREGLDWIVELECGDGDRDYHQSYVSQTLSAGTSREQMVGVALASMPDTSAGQLELPRPQRLPRARVLFGPTRDVLTDLAGWQDADWSIQDGQLQMLPRDRVLDDELILLSEETGMLGSPQLGDDGLTITCLLNPALRVGGQVRLVSRLDWLNGDYKIVRIHYKGDALEQDWKSTVTVVNQQIRGKPGKERGND
KB-PA_3-chr1	2143397	2144038	+	CDS	Phage protein	atgactgattacgattggcagatgccttccgccgaacggaccatggcacgagccctcgacagccggatcaagcgtctgcatacggcgttgccgggccgggtgctgagcttcgatccgcagtggcagaccgcgagcgtgcaaccgctgatcgaccaggtactggtggacggtacgcgagtggctttgccagtgctggctgacgtgccggtgcagtttccgcgtggcggcgggttcgtcctgacctttccggtgcggccgggcgacgaatgcctgttgctgttcaacgaacgctgcatcgacggctggtggcagtcgggcgagccgagcgagccgctggactatcgccagcacgacctgtccgacgcggtggcgatcatgggcatcagctcgcagccgcaa…	MTDYDWQMPSAERTMARALDSRIKRLHTALPGRVLSFDPQWQTASVQPLIDQVLVDGTRVALPVLADVPVQFPRGGGFVLTFPVRPGDECLLLFNERCIDGWWQSGEPSEPLDYRQHDLSDAVAIMGISSQPQAVPDFAGDATALRRLDGSAFVRIDDGGTVTIDGSRLQINCPVVFAAGMRGEGDVVSAGISLERHLHGQVMPGNGATGVPR
KB-PA_3-chr1	2144035	2144388	+	CDS	phage-related protein	atgagagtcagacgaatagacgaagagggcgactggctgttcggtcagggccgtaacaactacgccgataccggcgagtcggtgatgcagcgggtctgcacccgcctgcgctcgttcgagggcgactggtttctcgacctcgagcacggtctgccctggttcgagcgcatggcgcggcccgccgacctggccggcctggaggccgacctgaagcgttgcatcctgttgaccgatggggtcagcgagatcctcgacttccaactggccgtcgatccgcgggaccgtcggctgaaaatcgccatcagcctgcgcgatcgctacggcggcacgcaggcggcggaaatccttcgctag	MRVRRIDEEGDWLFGQGRNNYADTGESVMQRVCTRLRSFEGDWFLDLEHGLPWFERMARPADLAGLEADLKRCILLTDGVSEILDFQLAVDPRDRRLKIAISLRDRYGGTQAAEILR
KB-PA_3-chr1	2144486	2145631	+	CDS	hypothetical protein	atgggacaactgactgacaagggctatgtcgggcagcgcctggacagcatcctcgaggagctggaccggggtttccgcgctatctacggcaacgatatcgaccttgcgccggatagcccggacgggcagatgctcggactgatcgcgcagattcgcgccgatctcgaagagctgggcgaggcgatctaccgcgccctcgacccggaccacgccagcggtgcctggctcgaacagcgcgccgcgtatgccggactgctgcgccgccgggcgcgctacagctacctgcgcggggtgctcctgagcgggcgcccgggggcggtgctgccggctggcgcggtagtgcgtgatatcaaccagggccgttggcaactgatcggcgaaaccctgctgggcggcgat…	MGQLTDKGYVGQRLDSILEELDRGFRAIYGNDIDLAPDSPDGQMLGLIAQIRADLEELGEAIYRALDPDHASGAWLEQRAAYAGLLRRRARYSYLRGVLLSGRPGAVLPAGAVVRDINQGRWQLIGETLLGGDGSARGDFRSLELGAFPLPADSPLTLETLAPGWSAARNRQPAEVGVEEETDAELRARFFRSRARPAQNSLDGMVAEILQLADVREVVGLENTGNQADANGVPAHSLNLIVDGGDEQAIATVIFQRKTAGTGLHGDVEVTLADSQGIARRLRFDRPQVIACRALIEVQRDAEFSAVDGAAIKSALAASDFGIGQDVQLSRLYSPVNTVQGFWVSQLKIARVGQTPVAANIEIGVRQRARFDPADIEVVVL
KB-PA_3-chr1	2145628	2146281	+	CDS	Phage protein	atgagctacgagcgcctgctgatctggcaataccaggcgcggccgcgggccgctgccacggcgcagttgctcgacgcccacttcggcaggacccgcgagggcctggcgacgctgcccgcggcgctggacatcgacagtgccgaaggcgccaacctcgacctggtcggcaagcacgtcggccaatcacgggtgctgcgcggactggcgccgcgcagcctgttcggcttcgaggcgactccggccgccaagggcttcggccgcaaccgaatgggcggcggcaagtggtatcggctgggcgatccgttgcgcgattcggtggtgctcgacgatgacgactaccgtttcctgatccgctgccggatcgcccgcaactaccagctcggcaccctggcggacatc…	MSYERLLIWQYQARPRAAATAQLLDAHFGRTREGLATLPAALDIDSAEGANLDLVGKHVGQSRVLRGLAPRSLFGFEATPAAKGFGRNRMGGGKWYRLGDPLRDSVVLDDDDYRFLIRCRIARNYQLGTLADITAALDFIFDGQSVAYDQYDMTLSVVIRSDGITDFKRYAITTLDILPRPAGVGIRFYLAAPNRAFGFRGVPGALAFNQGKFARFL
KB-PA_3-chr1	2146278	2147258	+	CDS	Phage tail fibers	atgactcagtacaaacgccccgatgaagcggtgttcgcttccggcgccaaacccggcgaactggaggcgttccccgatatcgcccgtggctggggcgtggccttcgagcagaccgccgggattccgccgatggagtggttcaatgcgttgttcaagcgtaccgacgaggcgattcgctacctgatgcaacggggggtcgccgagtggtcggcgaccgaggactatcctatcggagccctggtcaagtcggccggcagcctgtggtccgctcgccaggcttccatcggacaactgccggggagcgattccgtttactggctggagtacggcagcaacaccatcggcacctacgcatccgtcccgacgttgttgcgtgagcgcgtcatctacgtaccgccc…	MTQYKRPDEAVFASGAKPGELEAFPDIARGWGVAFEQTAGIPPMEWFNALFKRTDEAIRYLMQRGVAEWSATEDYPIGALVKSAGSLWSARQASIGQLPGSDSVYWLEYGSNTIGTYASVPTLLRERVIYVPPYGLMEWQTSQSGYRSQRCGEILLQAAPVAKAGTVKANGGTLSKKNYPGLWGWAVDMGMVVSAAAWAPGNLAYADLGGDSFRVPDLRGEFLRAFDDGRGVDAGRRFGEAQQATDIPVMTVARKESDPSTGVLVTPLLSSLKPDGNGLMPTNADGFKSGGSGPYLAAPLSASGTTWASTFTTRPRNCALLAVIFV
Additonal Region 12
KB-PA_3-chr1	2283936	2283793	-	CDS	hypothetical protein	atgctgaccgtgttcgggtattcagtaaccgtgttgaccattacggttgagatgtatcgctttgaaatggcagaaaaagcgatgtggggagcttcatgcaacaaagccaactacatgaactgccaaccagattaccaacggtag	MLTVFGYSVTVLTITVEMYRFEMAEKAMWGASCNKANYMNCQPDYQR
KB-PA_3-chr1	2285552	2284023	-	CDS	hypothetical protein	atgagaaagtctcggtcgggcgtcgtgttttttggtgatgcggcccgcatcactctcccaggtcctgacctcggcaccggtggcgagctgggtggtgcgggccgcaccactctgccaaggaacgacctcggcgccggcggcgagctgggtggtgcgggccgcaccactctgccaggaccaagccacggcaccggcggcgagctgggtggtgcgggccgcaccactctgccaggaccaagccacggcaccggcggcgagctgggtggtgcgggccgcaccactctgccaaggaacgacctcggcgccggcggcgagctgggtggtgcaggccgcaccactctgccaggaccaagccacggcaccggcggcgagctgggtggtgcgggccgcaccactctg…	MRKSRSGVVFFGDAARITLPGPDLGTGGELGGAGRTTLPRNDLGAGGELGGAGRTTLPGPSHGTGGELGGAGRTTLPGPSHGTGGELGGAGRTTLPRNDLGAGGELGGAGRTTLPGPSHGTGGELGGAGRTTLPGPSHGTGGELGGAGRTTLPRNDLGAGGELGGAGRNTLPRIDLGAGGELGDSARITSPGPDLGAGGELGGAGRTTLPGPSHGAGGELGGAGRNTLPGPSHGTGGELGGAGRTTLPRIDLGAGDELGVSARNTLPRIDLGAGDELGVAARTTLLGPSHGTGGELGGAGRTTLLGPSHGTGGELGGAGRTTLPGPSHGTGGELGVSARNTLPRIDLGAGGELGVSARNTLPRIDLGAGDELGVAARNTLPGPSHGAGGELGVAARNTL…
KB-PA_3-chr1	2286880	2285549	-	CDS	FIG141751: hypothetical protein in PFGI-1-like cluster	atgaccatgaggctgtcgcgctttcccatttcgaccttgctggactcggcctcgggacatctcgaggaccacttgtttaagaagcggcttgctgccgaaagcggcgaaccgctggctcaacaatattccggcatcattttcagcggcaacccgcatgaaaccgttcctcggcgcctgctgctggataaacgcctcaccccgctggagcggaactgttggcaagtgttccgcttgctcatcaacgacgacgggctgaccgcgttcccgacatacgagcagttgcgcccctacctcggcatgcaaccgggcaagattgcctcgcgcgaaaccatcgccaaggcactcacggtccttcgtttgacacgctggctcagtcttggtcggcgactgcgcaacgat…	MTMRLSRFPISTLLDSASGHLEDHLFKKRLAAESGEPLAQQYSGIIFSGNPHETVPRRLLLDKRLTPLERNCWQVFRLLINDDGLTAFPTYEQLRPYLGMQPGKIASRETIAKALTVLRLTRWLSLGRRLRNDLNGQVQGNVYILHDEPVSPAEALELDSDYMQLLSQSTDHSNRAIREIGQITWREFRDDPDVGRRLPTHLEKLEGRLNHQQWAIDSQLEADPAAEFGIRTLPDLPHSTPSSEAELSEISNKQCALPLSSDAEPRQNPPSTPLVRMPNSYSTYTYKQDSVCKKPVQPRAREEAHPNWQDLLHALEAEQRIQAVSALRRVSEDLRLPIIEQWRHRCAGGTVGNPFGYLMTLIQRAVQGKFNASWAPEEPAERTILATERPIRAPAPSSP…
KB-PA_3-chr1	2287632	2286877	-	CDS	FIG004780: hypothetical protein in PFGI-1-like cluster	atgtcgaagtcgttgatcaatgaagcggtgctgacccaggtgctcaaccacctgcgcaacggccagctcaggcgttgtgccgagatggggctacggccggaaattctggctcagctccaacagcctgccgtcatgagcatcctgaccaataccccggtttcctgggtagacgtcagagtgaacatcgacgtcatggagaaaatcctggccaccgccgagcgcagcgcgcaggaagagctgcaaatcgagcgcgcactgaagctaggagccaccaccacgatgatccagagcttcttcggcctgtcgccggaggacaccgccaccaagcgcttgatcctggagatccacccgcgccgcggtcgctggcggcagctcgatgaacagatcgagcgccagatt…	MSKSLINEAVLTQVLNHLRNGQLRRCAEMGLRPEILAQLQQPAVMSILTNTPVSWVDVRVNIDVMEKILATAERSAQEELQIERALKLGATTTMIQSFFGLSPEDTATKRLILEIHPRRGRWRQLDEQIERQIWFRWEHLMHENQVRLEDSMELLDIAMILTEEINAGIEQDSPEFISLAIVWSLIQSWLKDNLYQPNRKGQAKPTTIYLASVSAHLPSPAAHPPQSPALKIESAQQQLLNLVQSDGDTTP
KB-PA_3-chr1	2289381	2287660	-	CDS	Protein with ParB-like nuclease domain in PFGI-1-like cluster	atggccaagatcaacccgcaagatctgaaagaccggctacttgcccctggttttaccgcgccgccggttctggagcagttgtcggacccgatcagcgacacgcccatgaggctgacactccacgacgtcctcccctggcacgataacccccggaccactcgcaaccccaaattcgacgagatcaaagagtcgatccggcaccgaggcctcgatacgccaccaccggtgacccggcgccccggggaagacaagtaccggatccgcaacggcggcaacacccgcctcgaggcgctcaacgagctctacaaggagaccggagacgagcgctatttccgcttcaactgcctgttcaggccctgggacaagcagcgcggcgaaatcatcgcgctgactggccac…	MAKINPQDLKDRLLAPGFTAPPVLEQLSDPISDTPMRLTLHDVLPWHDNPRTTRNPKFDEIKESIRHRGLDTPPPVTRRPGEDKYRIRNGGNTRLEALNELYKETGDERYFRFNCLFRPWDKQRGEIIALTGHLAENDLKGDLKFIERAVGIQKAKAWYEKEKGEPVGIRELSRKLTDDGYPVSHSHISRMLDAVEILLPAIPSMLYSGLGVDRVSRILSLRKASLGCWKRLYSGEGVDFEMLFQDTLAIFDSSPDEFIFERFQDELIGQMKRPLGLRYDQILLEITNGQQEQRRGTLVDLPTPAGPPEIPPVGQENPAASSTGQAQIQSPATGLQTSKTKSPPGTSTLPAPPPVQQQQLTDEERAAVLAGHIVSPVSTKIQQTRQRLAGLEGEHLPVF…
KB-PA_3-chr1	2288777	2292005	+	repeat	repeat region	atggctggaagcagtatctcaacggcatccagcatcctgctgatgtgagagtgcgagaccggatagccgtcatcggtgagcttccgagatagctcgcggatgccgaccggttctcctttctccttctcataccaggctttcgctttctgaatgccgacggctcgctcgatgaacttgaggtcgcccttcagatcgttctcagccaggtggccagtcagcgcgatgatttcgccgcgctgcttgtcccagggcctgaacaggcagttgaagcggaaatagcgctcgtctccggtctccttgtagagctcgttgagcgcctcgaggcgggtgttgccgccgttgcggatccggtacttgtcttccccggggcgccgggtcaccggtggtggcgtatcgagg…
KB-PA_3-chr1	2289653	2289384	-	CDS	FIG00960798: hypothetical protein	atgaagaacgttacttcgatcgaccgcaaacacgcagaagacaagtttgttgtacgcatgccgcaagggctccgcgatcaactcaagcaaaaagccgcggataaccaccgctcggccaacagcgagatcgtctaccggctggagcgcagcaacgagctcgaagaagaactcgctcgagcgaaccgaatggtcgacgagctcttcgccaagaaccagcgtctgcaggcagagctggctgcggcgaacacgcctcaggtggcggaggcatga	MKNVTSIDRKHAEDKFVVRMPQGLRDQLKQKAADNHRSANSEIVYRLERSNELEEELARANRMVDELFAKNQRLQAELAAANTPQVAEA
KB-PA_3-chr1	2290564	2289674	-	CDS	hypothetical protein	atgaaaggggttcgtcgcccaatcctgcgctaccacggaggcaagtggaaacttgctccctggatcatccagcacctgccgccacatcacacttacgtcgagcccttcggcggcgcagcctccgtcctgctccggaaagcccgcagctacgccgagatctataacgacctcgacggggacgtggtgaaccttttccgcgtcgcgcgcgatcacggagagaagctgcgccaagccctgactctcactccatttgctcgggacgagttcgaagccagctacgtcgaaacaaccgatccgctcgagcgcgctcggcgattggtgatccgaagcttgcaaggtttcggtaccgcagctgcgtccggcgaacgtacagggttccgctcaacctcgaccagatcc…	MKGVRRPILRYHGGKWKLAPWIIQHLPPHHTYVEPFGGAASVLLRKARSYAEIYNDLDGDVVNLFRVARDHGEKLRQALTLTPFARDEFEASYVETTDPLERARRLVIRSLQGFGTAAASGERTGFRSTSTRSGTGPALDWRNYPDTLTAITERLQGVVIENRDALALMEYHDRPNTLHYVDPPYVHSTRSTKVRHNATGKSYRYELDDNQHKELAALLKRLRGMVVLSGYPCPLYDELYSTWHRVDRHAYADGSRERIECLWLNSAALEGLAQLDFFQASNASPSPSFQTTAAHY
KB-PA_3-chr1	2291583	2290561	-	CDS	Nucleoid-associated protein NdpA	atgcctatcaaacacgccatcgtccacctgatcgagaagaagcccgacggcaccccggccgtgctccacgcgcgcgacgccgaactgggcggctcccaggccatcgagaacctgctggccgacctcaacgaaagctacaacgccaagaacaaggcctggggcttcttctacggcgagtccggcgcctacccgttcagcggctggctcggcgagtacctggagggcgaccgcgatttcgtcggcttcagccgcgaagcggtggagcacctgcagaagctgatggaagagtccaacctctccaccggcggccacgtcctgttcgcccactaccagcagggcatgaccgattacctggcgatcgccctgctgcaccacagcgaaggcgtggcggtgaacgag…	MPIKHAIVHLIEKKPDGTPAVLHARDAELGGSQAIENLLADLNESYNAKNKAWGFFYGESGAYPFSGWLGEYLEGDRDFVGFSREAVEHLQKLMEESNLSTGGHVLFAHYQQGMTDYLAIALLHHSEGVAVNESLEVTPSRHLDLGQLHLAARINISEWRNNKQSMQYISFIKGKGGRKLSDYFRDFIGCQEGVDSPGETRTLLKAFSDFVESEGMAEQQAREKTETLVDYATSQARIGEPMTLDALSELMDDQQPRAFYDYIRNKDYGLSPEIPADKRTLNQFRRFTGRAEGLSISFEAHLLGSRIEYDEERDTLQISSLPTQLRDQLKRRKAEQESTS
KB-PA_3-chr1	2291816	2291583	-	CDS	FIG034647: hypothetical protein in PFGI-1-like cluster	atgcgtagtttccttcgcggcgcccgggaaagcgttcgccggctggtggccttcgctcaagccgaaggctggagcgtcgaccgctccgccggcggccacttgaagctcagcaagatcggctgcgcctcgatcttcatctcttccacgccaagcgacgcacgcggcgagctcaatgcccgcgccctgctccgtcgagccgacaggcagcgttccctgaaccaggagtctttctga	MRSFLRGARESVRRLVAFAQAEGWSVDRSAGGHLKLSKIGCASIFISSTPSDARGELNARALLRRADRQRSLNQESF
KB-PA_3-chr1	2291982	2291809	-	CDS	FIG00954464: hypothetical protein	atgctgcgttccgcgcatgacgacctggcctgcagccggcagagcgatcgtcgcagccttcaggcgctggtgaaacgtctcctggatgccgccgccaccgatagccttccccgctcccttgcagagatggagacctggctgcagctcaacagcgaggagaccacgaatgcgtag	MLRSAHDDLACSRQSDRRSLQALVKRLLDAAATDSLPRSLAEMETWLQLNSEETTNA
KB-PA_3-chr1	2292281	2297123	+	repeat	repeat region	cggtaggcagtgacgtcagccatcgcacgctacctccttgggattgccacaggacagctcccagcggctctcgacgcgcttttcgtggtcgcctgcctgtgccggcatacgggtgatgtaggcgttgtcctcgccaaacagccgttcgtcaaggcgggaggctgccaccttgtcgctccaggtgcaggtcgcacgctgcttcttaatggtattggtccagaagccggcaccatcgaacttgacgatgcactgataggtctgggacgccttcatgattcggcctccttgctgagtgcatcaccgacctgaacggccaccagttcgggcaactccggctcatgcccgggatagttgttggccaactgatgcaggaactcacgcgcggcgtccttgctgcct…
KB-PA_3-chr1	2292553	2292296	-	CDS	FIG00963725: hypothetical protein	atgaaggcgtcccagacctatcagtgcatcgtcaagttcgatggtgccggcttctggaccaataccattaagaagcagcgtgcgacctgcacctggagcgacaaggtggcagcctcccgccttgacgaacggctgtttggcgaggacaacgcctacatcacccgtatgccggcacaggcaggcgaccacgaaaagcgcgtcgagagccgctgggagctgtcctgtggcaatcccaaggaggtagcgtgcgatggctga	MKASQTYQCIVKFDGAGFWTNTIKKQRATCTWSDKVAASRLDERLFGEDNAYITRMPAQAGDHEKRVESRWELSCGNPKEVACDG
KB-PA_3-chr1	2293077	2292550	-	CDS	FIG00957722: hypothetical protein	atgaacactgaagcccgctttccgagtatccacgcctcggccgcgttcaccgactcggcggtggttcatgccaatcaagttggggtcaatccgatcgaactggacgccctcagccaagtgatctcgcgcctttcgcgggacgagagcacggtcgcacccagttcgatggagcgagagcttcgtgagctggaggaactggggtacatcgagatctcaaccacccaggccgggaccctggtggtcactacgcgcgctccggggcaactgctttcggcctacttctggtcggtatggatcccgcgacacatgttcagctgctcgctgaaagtgagcctggtgccgcacctctgctgcggcactcaggactcacagcacctcaccgccgtgttccgcattgca…	MNTEARFPSIHASAAFTDSAVVHANQVGVNPIELDALSQVISRLSRDESTVAPSSMERELRELEELGYIEISTTQAGTLVVTTRAPGQLLSAYFWSVWIPRHMFSCSLKVSLVPHLCCGTQDSQHLTAVFRIAGSKDAAREFLHQLANNYPGHEPELPELVAVQVGDALSKEAES
KB-PA_3-chr1	2293252	2293067	-	CDS	hypothetical protein	atgaacacttcccagcccctggtcacccaccagtgcatgaattgtgaccagcaccacccacaccacttggtgcgccaggttcttcccgccgagaacaccccagaaggagaagccgaggtgttggtctgcccctgctgcgggagctacgacgtccatcagttggaggctgtctttgatgaacactga	MNTSQPLVTHQCMNCDQHHPHHLVRQVLPAENTPEGEAEVLVCPCCGSYDVHQLEAVFDEH
KB-PA_3-chr1	2294618	2293659	-	CDS	hypothetical protein	atgcgtgaccagcagaccacgaccaatcctcccgaggcttgcgcccagaatccagactggcgccaagacctgtcctatgcactaatcgagtccctcatggccgaacccgaagagcaggcaaaagccttcctgaaggctcatttggagcgactcccctactacgaacgcttcgggctctcacatgagaacctcgtcctcctgatggaggacctcttcaagcagttgcagtacaccttttccttcctgggtatcgatgcgacctggctcaggcagcgccagctcgagcgacaagtcgctcagacgaatgcttactctgtcttgaaggcactgcaaagcgccgtcacacagttgcggacccacgaagggccgagccccgtactctggttcacggggctcggc…	MRDQQTTTNPPEACAQNPDWRQDLSYALIESLMAEPEEQAKAFLKAHLERLPYYERFGLSHENLVLLMEDLFKQLQYTFSFLGIDATWLRQRQLERQVAQTNAYSVLKALQSAVTQLRTHEGPSPVLWFTGLGRTTRPFVRATALEHALRQALTDKGWSTPQIEDAWPSAGLQPYLQALGLCRQTLAFALDDPSQALDLPTQRAAVLAAHDELIIELRGRLLWESWNSPPADYEWGESAIVPMTSSSPTDATGQVLPATPRGRPPYYLWELVPAPASHRATPDAPLPGHEAAPAHRIWLAIFEQETAPAPAGASRSSAL
KB-PA_3-chr1	2295690	2295010	-	CDS	hypothetical protein	atgagccccttcattgaacttccgatctctcgccggcgggagccggcaaggagtctagtcatgcgtgaccagcagcccgctaacaatctcctttcgatagcgagcgccgaatggatacaagccttgcagaacttctgccaccacggacgagtgtatgacgggtccgccgccaatgcctggctattggatgcctgcctacttgttcccagcgctgccctcatccacggtgtcatcgagtacattcttaacagccgtgaggacataccatacggagggctacgcccaagctgggtggctcagcggctcgagcaggagggattgattagtcaccggtgcggggcagtcttgcactggcaggagcacggctatcgcttttccacggtggtcaggatcgacccc…	MSPFIELPISRRREPARSLVMRDQQPANNLLSIASAEWIQALQNFCHHGRVYDGSAANAWLLDACLLVPSAALIHGVIEYILNSREDIPYGGLRPSWVAQRLEQEGLISHRCGAVLHWQEHGYRFSTVVRIDPEQIWPDKRSRPEAFVTGPLDSQELGVIEILAHPNARRRSPSPVRLAALVRSSLAIPAEPLHPIANPPVLHAVLATYPELASPEWFPVARSSDA
KB-PA_3-chr1	2297030	2295687	-	CDS	Replicative DNA helicase (DnaB) (EC 3.6.4.12)	gtgagtgttctggaactcacgccgccgcactccgtcgaggcggagcaaggggtactcggcggcctgatgctggacaacgcggcatgggacattgtcggcgatcagttgcagaaggaggacttcttccggcatgagcatcggctgattttcaccgccatcagcgagttggccgcgaaggacgccccgtttgacgtcgtgacggtgtcggaagcgatcgaagaccttccagaagccggcgggctggcctacctcggccagctcgctgacaacacgccctccgtggccaatatcgaggcttacgcgcagatcgttcgcgatcgggcgcacctgcggcagttgatgtctctcgggcaccactgcaccagaaccgcctcgaaccaccaggcgaatccctgtgag…	MSVLELTPPHSVEAEQGVLGGLMLDNAAWDIVGDQLQKEDFFRHEHRLIFTAISELAAKDAPFDVVTVSEAIEDLPEAGGLAYLGQLADNTPSVANIEAYAQIVRDRAHLRQLMSLGHHCTRTASNHQANPCEVQEEIEQKLFALGQDQHKSDFVDINKGLAKIVDTIDYRFNNNVTVTGVPTGLKDLDELSGGLQKSDLIIVGARPSMGKTSFALNLIDAALQSDQQKSVQVYSMEMPAEQLLFRLAALLGHLDLGKLMKGQLQEEDWPRLTVAIQRINDYGSRLVINDQGNLTPTELRAKVRRAARKYGHPVLILVDYLQLMRCPGLENRATEISEISRSLKALAKEMDCPVVALSQLNRSLENRPNKRPNNADLRESGAIEQDADVIMFVYRDEVY…
KB-PA_3-chr1	2297152	2297027	-	CDS	FIG00953473: hypothetical protein	atgactcgctctgctctctcgaacatcgccatcgagtccgccaaggtggaggtgaaagcgctggagatcatcggcgccccgggcggaagcacgttcatgcagatcggccgggaggactcgaagtga	MTRSALSNIAIESAKVEVKALEIIGAPGGSTFMQIGREDSK
KB-PA_3-chr1	2297123	2297900	+	repeat	repeat region	ggcgatgttcgagagagcagagcgagtcatcgggaacctccctgctcgagcgcgccctgaactcgccggctgacgccgcggtgcaggcgagtgtttttgccgtgctcccagcctgcgtgcagcgaagcctggtcataggccaggggcttcgtcggcgccgccggctccaggtacttcaacgccggatggtgtagttcgaggtaggccttgatggctgcttgagtcgactcgtccggcctgccggcaaagtcacgtaccagcgaacgcactgcgagaagccagccttcgacgaagagcttgctgcgacggcgcttggtcgacagcttgcagcgcttctgttgggcgacatgagccgagcgcgccgccaccagttggtggtggagcgtagagtaggcgtga…
KB-PA_3-chr1	2297850	2297149	-	CDS	FIG004780: hypothetical protein in PFGI-1-like cluster	atggacaagcaaaaagtcctcgccaaggtcgagaagctgatggccctggcgaatgccaagggggccacaccgaacgaggcggaaaccgcattgcgccaggccgcgatcctgaagcgccagttcgacctcagcgatacggagatctcggcccacacggtggaaaccgcgtgcgttcccactcgaaccaggcgctctcctgccccatggctgcatgaactggccgggatctgcgccagttccttcggctgcgactacctggcggcatacgcgatgccagcgggctggacgttcaagttcatgggccgaggaatcggccctgagctggccgctcacgcctactctacgctccaccaccaactggtggcggcgcgctcggctcatgtcgcccaacagaagcgc…	MDKQKVLAKVEKLMALANAKGATPNEAETALRQAAILKRQFDLSDTEISAHTVETACVPTRTRRSPAPWLHELAGICASSFGCDYLAAYAMPAGWTFKFMGRGIGPELAAHAYSTLHHQLVAARSAHVAQQKRCKLSTKRRRSKLFVEGWLLAVRSLVRDFAGRPDESTQAAIKAYLELHHPALKYLEPAAPTKPLAYDQASLHAGWEHGKNTRLHRGVSRRVQGALEQGGSR
KB-PA_3-chr1	2298725	2297850	-	CDS	hypothetical protein	atgaagcctatgattcaagcccacctggtcgagcgcgaccagttcggcttctggacccatccgaactatccagacctggccgacaactgctcttccaacgaggcgcaggaaacgctgcgccggcttggccttgagttgcagaccgtcttcatggagtcggatgcgcctcgcctctacgactctgcacgatcggaccaacgatacagcgagtggatcccaacgcgacccgaaggctccggttggttcgtgctatcgatccacgataccgataacggcccggtgtgccagtacgtgcgaccgctcggagagcacctgagtccaatcgatctcgatgcggcagcagaacagcatgaacgcctgctcagcgaggcttgtgccaaggccttgaatcagcgcgac…	MKPMIQAHLVERDQFGFWTHPNYPDLADNCSSNEAQETLRRLGLELQTVFMESDAPRLYDSARSDQRYSEWIPTRPEGSGWFVLSIHDTDNGPVCQYVRPLGEHLSPIDLDAAAEQHERLLSEACAKALNQRDAALARVASLESKLEELEKLEPAAPSDPKLKPCPLCGSTNIRMLEPELLDTNAWNCAIECLDCQVYIGPSYCEPDTVTARYSAQVDWNRRPSAKNHADEREQFLMANLLAALEVALGDVAALAIVDRVRQVADRIYPTSNLSPDRSATEQGSTCCKGGA
KB-PA_3-chr1	2297900	2300851	+	repeat	repeat region	caggggagaggttcgaagttgggtagattcggtctgcgacctgtcttacccggtcgacaatagccagggctgctacgtcgcccagtgcgacctccagggcggcgagcaggttggccatcaagaactgctcacgctcgtccgcgtggttttttgcgcttgggcgcctgttccagtcgacctgtgctgaatacctcgctgttactgtgtctggctcgcagtaggacggcccgatgtaaacctggcagtccaggcattcaatggcacagttccaggcattggtgtcgagcagctcgggttccagcattcgaatgttcgtgctgccgcagagcgggcagggcttgagcttggggtcactcggggctgccggttccagcttctccagctcctccagcttggact…
KB-PA_3-chr1	2299219	2298722	-	CDS	hypothetical protein	atgaacctccagaaccgcaacaacctcatcctgagcctgatcgccgagacccagttcgacgcctacgtgcaaggctacatggccaaagcaggcgctgccgccggtgcttccgacaatctgctggtcgaggctgaaggtgctgcgatgctgcagggccttgtcgctccggttcgcgctcagcagcgtgcctgtggacagcccctgcagaacgccctgctccaaatcgcccacgacctactgttgcagacgaagtcgcaactggccatcgcggccaatgccagctcgatccacgtgatccagcgggacatgaacagggctatctggaatatcgcgactgccatcgatcacctggccgagttcgcccaaccctcccaggacaccgtgaaggtcatcgagcgg…	MNLQNRNNLILSLIAETQFDAYVQGYMAKAGAAAGASDNLLVEAEGAAMLQGLVAPVRAQQRACGQPLQNALLQIAHDLLLQTKSQLAIAANASSIHVIQRDMNRAIWNIATAIDHLAEFAQPSQDTVKVIERLMLFVGSSPSPEGQQLAAEASAVLGMSEGGLA
KB-PA_3-chr1	2299953	2299216	-	CDS	Orf50	atggcgaagcctcctatcacccaagcccgcgacgtcgacgcggaacttgtgctgcaactgaacaagttcggcagcgccgccgaccttcggagccaacaggccaagttgaccggcgctgcgcgagaaatacgcaagctgactggtggcggtaccgacctgttcgggaagctgggttgctacttgagcttcgagcaaaagcagctcctacaagacgctgcgcgcttgctcgactcggtgaaccagcaggtcgagcatgcgaaggaaaagcgtgatcgcgacgagaaacaggccaagaagcggcgtgagctgcgcgggcgcctggccaagcaactggtcgcctcgaactacccgcttccgggaaatacgctcgaagagcggctggaaatcctgcagatcgcg…	MAKPPITQARDVDAELVLQLNKFGSAADLRSQQAKLTGAAREIRKLTGGGTDLFGKLGCYLSFEQKQLLQDAARLLDSVNQQVEHAKEKRDRDEKQAKKRRELRGRLAKQLVASNYPLPGNTLEERLEILQIALIYNRAKVFDPLYSTHQLHSKLKRWLERPKQLIGWRSEAEYFASQVGSLRCDFISHLTHEIAYDDGREVEERLRVIKQKVADCTAQIALTSEEQETLQLWTDALQSAPEGLI
KB-PA_3-chr1	2300815	2299955	-	CDS	Chromosome (plasmid) partitioning protein ParA	atgatagcgacttcggtcatttccacgaagggtggtgcaggcaaaaccaccaccaccgccaacctcggtgcgatctgcgccgatgccggcctaaaaaccctcctgatcgacctggaccccgtccagccctccctatcctcgtactacgagcttccggaagttgcccagggcggcatctacgacctgctcgccgccaacataacggacccggcgaggatcatctccaggacgattatccccaacctggacgtcgtgatttccaacgaccagaacaatcagctcaacaacctactgctccaggcgcccgatggccggctacgcctggcgaacctgatgcccgctctgaaagaaggctacgacctggtgctgatcgacacccagggtgcgcgctctgctctc…	MIATSVISTKGGAGKTTTTANLGAICADAGLKTLLIDLDPVQPSLSSYYELPEVAQGGIYDLLAANITDPARIISRTIIPNLDVVISNDQNNQLNNLLLQAPDGRLRLANLMPALKEGYDLVLIDTQGARSALLEMVVLASDLVVSPLQPNMLTAREFNRGTMQMLDGLRPYERLGMRIPKVQIVINCLDQTNDARTIHHNVRAIFDEHRDISVLETTVPDAVVFRNAASLGLPAHRLEYRQPSNRTSPSALEIIRDLAIEIFPEWTDRFLALTPEAVAALVKGGR
KB-PA_3-chr1	2301820	2301254	-	CDS	hypothetical protein	atggcgacacccattcttcatgctcggcagtggctgctgtcgctcggcgtcctgtgcgccgcctccacggccttcgccgaagcctcgggcgactactggatcgtctacggcaagggcgaacgctaccagaacgaagtgttcgtcgccgacgccgccggcatcctgcaaaaacccaagggcgtgcaatccgcccagatcatgcagatcttcgaagaccgctcgatgccggtgctggcggcctatgagatccagtacaagtgcaccgagcgcaaggttcgcttcgacaaagcacatgccatgagccgcctcgactatgtcgtgaagaaggtggaaaccgttcagggctggatcaatccggaaaagtacgatgactggctgcagcgctcgttcaccttcatc…	MATPILHARQWLLSLGVLCAASTAFAEASGDYWIVYGKGERYQNEVFVADAAGILQKPKGVQSAQIMQIFEDRSMPVLAAYEIQYKCTERKVRFDKAHAMSRLDYVVKKVETVQGWINPEKYDDWLQRSFTFICAPANRSNNQMLSLGKMTSANMVRTVQAMFVELQGVQAKSQTMRDLDAMLGNKPK
KB-PA_3-chr1	2302052	2302456	+	CDS	hypothetical protein	atgcccaacccggttttcataaaaagaacggtactgtttggcgactgcgaccccgaggggatcgtctatacgccacggttttcctatttcgtcctggaggccatccaggaagcgctcggggtctggctgggaggtccggggctgaggaccctcctgggcttcaggatccttcctcctgcgcgggcgttctccctggagttcctgcatccgctcacctgggacgacgagctgacgatgcgggtgagtgtgtcgagcgtgggcacgcattccttctctttcgcggtcgaagggtgtctcgcgcctgatctcgtggtattcactgcgagcctgacgcaggtttgcgtttctccgcagacgcgcgaagtcatggaggttccggcgcaactccgcgcgcttctc…	MPNPVFIKRTVLFGDCDPEGIVYTPRFSYFVLEAIQEALGVWLGGPGLRTLLGFRILPPARAFSLEFLHPLTWDDELTMRVSVSSVGTHSFSFAVEGCLAPDLVVFTASLTQVCVSPQTREVMEVPAQLRALLE
KB-PA_3-chr1	2302763	2302500	-	CDS	Uncharacterized aldehyde oxidase, 2Fe-2S subunit	gtgacacccgccggcgccgccaggggcaagcgcgttaccaccatcgagagcattggcgctaccgcgatagggcaggcggtccagcgggcctgggtgaagctggacgtggtgcaatgcggctattgccagtccgggcagatcatgagcgccgccgcgttgctggcgcagcacgccaagccaagcgatgccgacaacgctgggcggatggccggacgagcgccgccagcgacacccgggcgacagcgtggccggttgggaagataa	MTPAGAARGKRVTTIESIGATAIGQAVQRAWVKLDVVQCGYCQSGQIMSAAALLAQHAKPSDADNAGRMAGRAPPATPGRQRGRLGR
KB-PA_3-chr1	2302936	2302760	-	CDS	Uncharacterized aldehyde oxidase, 2Fe-2S subunit	atgatagacctgaccgtgaatgaccgggcgttgagcttcgacggctatcccgaaatgccgctgctctggtatctgcgcgacgaagccggcctgaccggcagcaagttcggtgcggtatcgccctgtgtggcgcctgcaccgttcacctcgacggtgtcgcggtacgctcctgcgtga	MIDLTVNDRALSFDGYPEMPLLWYLRDEAGLTGSKFGAVSPCVAPAPFTSTVSRYAPA
KB-PA_3-chr1	2303159	2302914	-	CDS	Uncharacterized aldehyde oxidase, molybdopterin-binding subunit	gtggagcagtcgaactttcacgattaccgcccgctgcgaatcggtgagatgccggaaatcgaagtgttcatcgtgccgtccggcgagaagcccaccggcgtgggcgagcttggcgtgccagtgatcgccccggcggttgggaacgccctggtccagctcggccggccgcgcagcacgctcagtctgccgttccatcggcctggcgctcgaggagtagaagaaaatgatagacctgaccgtgaatga	MEQSNFHDYRPLRIGEMPEIEVFIVPSGEKPTGVGELGVPVIAPAVGNALVQLGRPRSTLSLPFHRPGARGVEENDRPDRE
KB-PA_3-chr1	2303170	2303424	+	CDS	hypothetical protein	ttgagcgtgacgtttccgtacagggccctgccagttcgccgcctcggcgactgcccggagaacgccggccgcgcgtggggcctcgcgcatctcggcgtgccgatggccggcctcgcctgctggggggtgacctaccagtgcagcatcagcttcgagggtcgcgccgggctggtcgtcgactacgtgacccgcggcggccaggaaatccttgatgcgcattcgcactgcagccgggtgttcggcacgttcgagtga	MSVTFPYRALPVRRLGDCPENAGRAWGLAHLGVPMAGLACWGVTYQCSISFEGRAGLVVDYVTRGGQEILDAHSHCSRVFGTFE
KB-PA_3-chr1	2306428	2303582	-	CDS	hypothetical protein	atgagggtaacggttcggcgcgcactcgccttccttgtcatgttccttgccagcactacggcaagccaggctcagcagccagccatcaacctgttcggacgaatagcctcgaccacccgtccctggctgaccgacatggaccggcaatggctagccaagcgaggcccactgaggttcggggtttccgcccccgactacccgccactggaactgctgagcgccaatcatctgcaaggcatcacggcggactatctggaactcctgttcgaccagtccgtccagatcgtccggcttccatcgagagaggctgccctacaggcgctacgccagggcgagatcgacctgctgggctccagcactcccgtggaggccgccgatagcaagatggtcctcagcgaa…	MRVTVRRALAFLVMFLASTTASQAQQPAINLFGRIASTTRPWLTDMDRQWLAKRGPLRFGVSAPDYPPLELLSANHLQGITADYLELLFDQSVQIVRLPSREAALQALRQGEIDLLGSSTPVEAADSKMVLSELYLPDQPVLVSTLEAPFTQRQAGIRLAIPPGYLKESQVTAAYPGSRLFLYESTKRALEALALDEVDAALGDVVSSNYLINTNYWVNLKIRSFAPIESRGFGFLLRPGDTWLRDYLARAVPAVSAQYGDSILRSWSGGRSIRLSDSRIALTPRENGWLAEHPSVRVVLNGSLGALGQFTQNGKAVGIGPDYLELISQRSGLRFEYLQARNYAELDEAMAKGSALLSPVMSPSSGLPRSIELLPPYLQSSVIVLSAKSASITDREEQV…
Additonal Region 13
KB-PA_3-chr1	2410023	2411159	+	CDS	Aminotransferase, DegT/DnrJ/EryC1/StrS family	atgaacaacaagacgatcccggtcaccagcccgcttctgccgcccctggaagagttcatcccctacctggaaaagatctgggagagccgtttcctgaccaacgggggcgacatgcaccatgcgttggaagaggccctgtgtgaatacctgggggtgaagcacatcgtgctcttcgccaacgccaccctggcgctcatcaccgcgctgcaggcattgcgggtgaccggcgaggtgatcaccacgccgtactccttcgtcgccaccagccacgcgttgctgtggaacgggctcaagccgatcttcgtggacatcgatcaggactccatgaatctcgatccgtcgcggatcgaggcggcgatcaccccgcagaccaccgcgatcctgccggtgcattgctac…	MNNKTIPVTSPLLPPLEEFIPYLEKIWESRFLTNGGDMHHALEEALCEYLGVKHIVLFANATLALITALQALRVTGEVITTPYSFVATSHALLWNGLKPIFVDIDQDSMNLDPSRIEAAITPQTTAILPVHCYGNPCDVEAIQRIADIHHLKVIYDAAHAFAVRDAGGSVLRHGDLSILSFHATKVFNTFEGGAIICSDENTRQRLNHLKNFGFVDEVTVVMPGINGKLNEVGAAFGLLQLKHVDQALEQRREIAERYRLLLSGVPGIQCLRPGTQTFANNAYFPILVEDDFPLSRDELYQRLRDRDVLVRRYFYPLISDFPMYHSLPSAAPANLPVARSISSRVLCLPIYPGLAAADVEFVAGLIASAAMPRRRASS
KB-PA_3-chr1	2411214	2411438	+	CDS	Acyl carrier protein	atgagccaagcaaaattcatcgaagacttcctttccgccaccgatttccagaatcccgtcgaggtcagcatggacacccagctcgaagacctgccggaatgggactcgctggccgcgctcggggtcatcgtcatgttcgacatggaatacggcaagaccatcaccggcgaagacctgatcaaggcccgcacggtgggcgacctctaccagatgctcggactctga	MSQAKFIEDFLSATDFQNPVEVSMDTQLEDLPEWDSLAALGVIVMFDMEYGKTITGEDLIKARTVGDLYQMLGL
KB-PA_3-chr1	2411441	2412481	+	CDS	putative ketoacyl-ACP synthase	atggccacctccacgctgaagaacgtccgtttcgccgggatggcgacctgcgtccccaagcgcgttatctccaacctgaccgactgcaagccgcagttgcgcgccgagcgcgaacgcctggtgcgcaacatcggcatcgagacgcggcgcatggcgcaggagtggcagtgcttctccgacctggccttcgacgccgccgagcgcctgctggaaagcctggaatggaagcgcgaggagatcgatgcgctgatcgtcgtgacccagtctcccgactacctggcgccggctaccgcgatcatcctccaggaccgcctggggctgccgcattccaccgtggccttcgacgtcaacctgggttgctcggcctatccgttcgccctcaacctgctgggttcgctg…	MATSTLKNVRFAGMATCVPKRVISNLTDCKPQLRAERERLVRNIGIETRRMAQEWQCFSDLAFDAAERLLESLEWKREEIDALIVVTQSPDYLAPATAIILQDRLGLPHSTVAFDVNLGCSAYPFALNLLGSLIAAGGVKKGLVLVGDRGASVNDPIFSDAGTATALEFCEGAPPMHFDLNSDGSGYKAIILPVGGHREPVGVQHLMPFREDENDHWHRAIDLQLDGTAVLSFSTQRVPPAVEKLLDYAGASKDEVDYFVFHQANRMINETIRKKLGLPVEKVPSTLRDFGNTSGASLPVTMTARLNRELEAGRNRVLLCGFGIGLSWGTCLVDIEGARFPDLIES
KB-PA_3-chr1	2412495	2413244	+	CDS	Oxidoreductase, short-chain dehydrogenase/reductase family	atggatacggttttgagcgctttcggtctgcaggggcggagcatcctcgtcaccggggcttcgtcgggcatcggtcggcagatcgccctgagctgcgctgctgccggcgccacgctgatcatcagcggacgtaacggcgagcgtttgcaggcggtgctcgacgaactgggcggcgagccacacaggatgctggcggcggacctgaacgacgaagcgcagatcgacgccttgagcggggcgctcggcaagatcgacggcctggtgcatagcgctggaatctcggcgctgtcgccgttgcggatggccagtcgcgagcatatcgagagccaactggcgaccaacgtgatcgcgcccatgttgttgacccgctacctgctggcgcggcagtgcatcagcaac…	MDTVLSAFGLQGRSILVTGASSGIGRQIALSCAAAGATLIISGRNGERLQAVLDELGGEPHRMLAADLNDEAQIDALSGALGKIDGLVHSAGISALSPLRMASREHIESQLATNVIAPMLLTRYLLARQCISNGASILFISSISAHIGVRGVSAYSASKAAVEGMARSLSVELASRSIRVNCVAPGLVQTPMLEAALATTGDLSATMARYPLGIGQPEDVANAAIFFLSSASRWITGRALVLDGGHTVE
KB-PA_3-chr1	2413248	2413886	+	CDS	N-acetylglutamate synthase (EC 2.3.1.1)	atgcgcaagaagctgataatcgtcggcgccggggggttgggccgggtggtgtacaacgttctggtcaacgacgcggaattcgccgagcggtatgtgctggccggctttctcgatacccgtccagacctgaagctaccggacgatatcccggttcccgtgctgggaagcccgctcgatcaccaggtccgctcggacgaggcgttcctccccgccgttggcgacccacaattgcgcgagcgcctgctggcgcctttgctcgaacagggggccgagctcgccacctacgccgagcgggctttcatcggtgcgcggacccgcatcggcgcggggtccttcatcaccccgggcgcggtcctttcggtggacagcgaaatcgggcgttgcgtctacatcgatacc…	MRKKLIIVGAGGLGRVVYNVLVNDAEFAERYVLAGFLDTRPDLKLPDDIPVPVLGSPLDHQVRSDEAFLPAVGDPQLRERLLAPLLEQGAELATYAERAFIGARTRIGAGSFITPGAVLSVDSEIGRCVYIDTYVVLGHDVSIGDHAMLGAMTFLAGGVRVGHGASIHPRATLAKDVIIGEGATVGIGSVVVNDVPAGVTVFGNPARIIFSK
KB-PA_3-chr1	2413896	2415071	+	CDS	hypothetical protein	gtgaaccgtgatcaggcactggcacgattcgaaacggatgtcatggctctgaacgccagctcgggcggcggacggcatccggaaatactcgggcgagcccggcgggtctatctgctcggacccacttcgttcctggggctcggcttcgcggcgagcatcgcgcagaagctgggcgcctcggggaccgaggtcgtctgcgtcgacgatggtctggccagtcgccggcaaccgttcggtgaatacagggtgctcgacaccaaggggttcgtcgaggacgcgcgtcgccatccgggagcgctttcggtgaaccttggcaattcggtatttgccgcctgctttttctcgcaggcttcgcagcgtgccggtgtgcaggagttggatatcataccggtgctggac…	MNRDQALARFETDVMALNASSGGGRHPEILGRARRVYLLGPTSFLGLGFAASIAQKLGASGTEVVCVDDGLASRRQPFGEYRVLDTKGFVEDARRHPGALSVNLGNSVFAACFFSQASQRAGVQELDIIPVLDFLELPVIYQTAACMRAATLERLDDYRALARRFQDPLSIRTLGALLELRLTLERRAVLPVLCSLENEYFAPYAAGEVDTFRLGEREVLVDVGAHVGTTIGKFLTATRWKYQSIHAFEPDRENYAALERGYFATLDDFHAYNMALSDTRSTLQFAQTGTMGSRIDQGGNVQVQALPLDEVLDHATFIKMDVEGHETSVLRGARKLIATHRPRLAVTGYHYADDLLDIVRLLDEIEPSYDLRLRHHSYYYYDSILYAEARS
KB-PA_3-chr1	2415068	2416267	+	CDS	hypothetical protein	atgatcaagccggtattgccgccggcctgctacaccgagcaggactggtacgagcgcgaacagcatgaaatcttcggccgtttatggctgctggcgggattgacccagcaactggcggccgaagacagcttcatcacccgcgacttcagcgggacgcctgtgctggtacagaacgtcaaggggcagttgagggcgtttcgcaatgcctgtgcacaccgcggcatgccgatccagacggcggaccatggggtgcgcaagatgatctgcccctatcacggttggggctatcgggaggatggcgccttgcagggaatcccgagtgcagggctctacaacatatgcaagacggagagggacaacgccagattgcagcgttatgcgttggaggtggttggaagc…	MIKPVLPPACYTEQDWYEREQHEIFGRLWLLAGLTQQLAAEDSFITRDFSGTPVLVQNVKGQLRAFRNACAHRGMPIQTADHGVRKMICPYHGWGYREDGALQGIPSAGLYNICKTERDNARLQRYALEVVGSFVFVSLSEQPLPIAEQFSSEILEFLTSSSAHFAPQVSYTRFINHYNWKLNFENILDWNHFRFVHPQTLAPLLQYSSDGVIKAPAGALSPSGVEVREPLEAGTAEEEAIDIEATVAAVPDEVCLKDLSLYERASMPYVPRWFSSLVEASNSRGAFFNCKLFPNMNFGSIHGEHFYLQQYVPLAPDRIEYHSWVFTSRLKPEVPPQPHLLWGIHHAEKRVIDEDSVLLTELQRALKSATTIGIMGDHEAPLAAMGKWYMQRLAGEDAS
KB-PA_3-chr1	2416264	2416890	+	CDS	Acetyltransferase (isoleucine patch superfamily)	atgaaatccctgctggttctcggtcccgacagttctctgcgcgggatccactcgctggcgcgacaggtatggccgcagcgacagatggaaatgctggagatcccctccaccgactactaccacttcgatctttccgcgctcggtcgtttcgacccgcaggagtggcaggtctgtgtggtagtcaacgagttctatgtcaacgatgtccggcgcgccttggcggaggccatcgcagctctcggctacgaaccggcctcggtggtttcgccgcgcgccgagatcgatccgacggcggtgctgggggacaacgtgatcgtccagagtggctgtgccatcggaccgaacgcgacgctgggcgaatactgcgtgctgcggcccaatgtggtcctgagcgaggac…	MKSLLVLGPDSSLRGIHSLARQVWPQRQMEMLEIPSTDYYHFDLSALGRFDPQEWQVCVVVNEFYVNDVRRALAEAIAALGYEPASVVSPRAEIDPTAVLGDNVIVQSGCAIGPNATLGEYCVLRPNVVLSEDVTLGRFVTLEANVSIREGASVGDFTTICANSSLARMTRVGAHCYLNLQRHYSGSIADMTFYSPMFEQPVRVLPGA
KB-PA_3-chr1	2417015	2420521	+	CDS	O-antigen biosynthesis protein	atgagttcagctaccctcgtcagcatcgtcatgccgacctacaagttcgaatacttcgaggaagccctcgacagcgtgcttggccagacctatccggagctggaactgatcatctgcgatgacagcgaagatgggcggatcgcggcgctggtcgaggagaaacgcgccagtgcggcattcccgatccgctaccatcgcaacgagacgcgcctgggggaactgggcagcacggccaggggcatccgcctggccgagggcgaatacgtcaagttcctgcacgatgacgatgtgttgcagcccgagtgcgtcgaggcgctggtgggggtgatggagcgcgaaccgaacgtggtcctggcctcgtcgcggcggttgcgcatcgacgaagaaggacagcggctg…	MSSATLVSIVMPTYKFEYFEEALDSVLGQTYPELELIICDDSEDGRIAALVEEKRASAAFPIRYHRNETRLGELGSTARGIRLAEGEYVKFLHDDDVLQPECVEALVGVMEREPNVVLASSRRLRIDEEGQRLPDILATCFPFAGDVLIDGRELVSFLADHTINFIGEPSCTMARRGALLPICDQLMILNGRHIHWVGDLAMCAQLLQRGDLAFLSRPLTRFRVSRQQFSQIGRDQPGIGEQGHADFRLAIRELGWYRQAGDNRFVRVAPITRLDARVFKPVNLLAALRRAAGFGSVTLSTWLEARRPDAVQKALIDRFLQEQGGGPRFAVLVLDAHGDTEAVERTLQSLEHVNSYPRVESHLFAPLGTSPRNGAMFFDPEAGPVPTINQALARLDTDW…
Additonal Region 14
KB-PA_3-chr1	2713424	2712498	-	CDS	hypothetical protein	ttggaaaaactcaccaaccttggaatatatgaagaactttttaaagcagaaaaaatgcctaccaagtgcctgctttgcaaaaaaggagaactagacgagctcggccacatcatccccaaatttgtaatgcgctggctaaagcgagcgagcaagcttaatagcttctacttcaacaatgatcgtgacaaaatggtggccgacacaccagcctttaagatgatgtgcaaaacttgcgaggataaactctcaactttcgaaaaatactttaccgacgagattttcaagaaatattatcgaggcaaaacgccaagcccaatcgatgacgaagtgtacaatttcgccatctcaatcgcatggcgattaatcgtgtctacagagcgcctaaaagacacacaacca…	MEKLTNLGIYEELFKAEKMPTKCLLCKKGELDELGHIIPKFVMRWLKRASKLNSFYFNNDRDKMVADTPAFKMMCKTCEDKLSTFEKYFTDEIFKKYYRGKTPSPIDDEVYNFAISIAWRLIVSTERLKDTQPKENTFEAIYSPSESMMRNYLNNEIEKCHHSVYALPIDKITRNISKNLIDDNALKYTIRQGLKAHLIADERRDIVLSFTHLPIIHFKIGCYYFFILQDNYFAGAEFEISSTKASKAKELYVLDYTPDLLGFMEWLMDGHFFEVNTKDIPLKSYTHRDAPTLWNLVFGSNKAQSDPV
KB-PA_3-chr1	2714220	2713510	-	CDS	hypothetical protein	atgacctgcattctggtcgcgcatttaggtgatgaggtcatcatcgcggctgacaaacgtgtcactcagctcaccgagcacggcgcaagaatcccttgcggtgacaacgaagagaagatcgtcagaacagaggttggcatcatcacgggcgccggctccctggcgatgcttgatcctgtcaaatcgcttgtcagagaccatggcttcggcagtcctgatgaggtattggagctgatcctgcaagtccgcgcctcatttgcacaggttcatgctgatagccctcgcctagcagccgatctcaccgagacgtcatggatgttcacgtaccccactctggtgaatgatcaacctgttactcgtttcgtctacttccaccagcaccacagcgccgaatcccta…	MTCILVAHLGDEVIIAADKRVTQLTEHGARIPCGDNEEKIVRTEVGIITGAGSLAMLDPVKSLVRDHGFGSPDEVLELILQVRASFAQVHADSPRLAADLTETSWMFTYPTLVNDQPVTRFVYFHQHHSAESLCRLTEGRVMCFPGGFSLAQAQALQARLQAVVTEALESLPANQVKQSVVSFMLTLMSETAAISGTVSSTCDVALVNGRDVDIASGVSAGDEILEFIPMPRLAAQ
KB-PA_3-chr1	2714397	2714735	+	CDS	hypothetical protein	atgattagagtattgctgtccctagatctgaacgatgcttctcgagagcagcgtgatgacctttatgaaattctgaaaggtaaaaactggaagaaggcaaagcatgtcgacactgtgtggacgttaacttatccagattatgatcatgactcggaagacgattttaaaaaaatcagagactatctggcgaaaactttccgcggttctgcggaaaagctgggtttaaaggaaatttattacgtggctcaattgggtaatgaaagcgtaatatcgcgggttgtgaaaaaagttgatgggaaacacaaagtcttacgcgctgatctttatgatgcgaaatga	MIRVLLSLDLNDASREQRDDLYEILKGKNWKKAKHVDTVWTLTYPDYDHDSEDDFKKIRDYLAKTFRGSAEKLGLKEIYYVAQLGNESVISRVVKKVDGKHKVLRADLYDAK
KB-PA_3-chr1	2718516	2715910	-	CDS	hypothetical protein	atgagtacgttcgcccaagacttgtctagacgactgaccggtcacgcgtccttttggacctatcttggacagcttcagggagctggagctgcccgcacactggccagaccgttggacgatgctccgaccttagatatcgataaggtactcaaactgctctactgcgcatcggtcttcgtgcagaccgatgcggacgaactaaagcggctcgctcaggcaatcgttctcaacacactgttgctacacgaggacggcgaactgcgcgaacggagcctccatgtcctcacagaactgggaaacttcccggggttgtcctatgccgaacgcgcctatggtgcgggcgaccagacgctgctcggcagaatgaaccgtcaggtatcgcaggcattgaatacggta…	MSTFAQDLSRRLTGHASFWTYLGQLQGAGAARTLARPLDDAPTLDIDKVLKLLYCASVFVQTDADELKRLAQAIVLNTLLLHEDGELRERSLHVLTELGNFPGLSYAERAYGAGDQTLLGRMNRQVSQALNTVAINGLPVALTDYQKQVWDRLPITRALAISAPTSAGKSYVVIEHLCQQAEKHQHFTAVYIAPTRALLSEVQQKIQLRLKGRDEIRISTVPSLDPLQRTCQVFVLTQERLQVLLSIYGAAFNVVVVDEAQNLSDHARGMILQDCLQTLMSRSSTTQLVMLAPGATGLPEIAKAIGVDALRPEFTGVSPVLQNRIVVSKVKGSPNEMRLQLLRGPEERVEIGNLVSSLGLDNKATRLAAIALELGGGEGSLVYETGPREAEKTALQLMN…
KB-PA_3-chr1	2719523	2718513	-	CDS	hypothetical protein	atgaacggcgtgcaggacaacgacaagacggatgccgagatcgtccaggacgcgctcgagaaactgctcgacaagtcaccactggggaaattcgtcaagctcacaatccggtccgaggatccgacaactccactgacgaccttgatgcatatagggttcaaggaaaatctcggtaacacgctggcgctagcagactttctttggacacaggcgctgaactacgcactgacgagaaggcggcgcgagcagattcgggccaggctggaggatgcaccgcctggagacatcagcgcgatcgcagcccctgtcaacgccgcgcgcgacgcctttatacaattccacaaagactaccccagccgcgccagtgaagtaggagaggtgctggcctactgcatcgcc…	MNGVQDNDKTDAEIVQDALEKLLDKSPLGKFVKLTIRSEDPTTPLTTLMHIGFKENLGNTLALADFLWTQALNYALTRRRREQIRARLEDAPPGDISAIAAPVNAARDAFIQFHKDYPSRASEVGEVLAYCIAVNDLGAAQVAAKMSLKTSGNMPVHGLDGIHAKVEAGALYVFFLESKLSQSANAGVKDYAESVAGFGSNLKQYLLEYSIVRDLGNLDSLTGAERDLALACFDVMDSPDTVERRERSVGVILYKENQFEKLSPVKQGQPVGFHEAEFVAAYASQLAHHQNAALKHLAAGNVDTNKCQVYFVAVPDVDELREQFYQRMGYIPKVKE
KB-PA_3-chr1	2719808	2720029	+	CDS	Insertion element IS407 (Burkholderia multivorans) transposase	gtgtgccggtgtgccggtgtgccggtgaaggaactgtgtcgccgacacggcttcagtgatgcctcgttctacacctggcgggccaagtttggcggtatgaccgtggcggacgccaaacggttgaaggatcttgaactggaaaacagccgattgaagaagctgctcgccgaggcccacctcgacatcgagtcgctgaaagtggtcgcccggggaaaagggtaa	MCRCAGVPVKELCRRHGFSDASFYTWRAKFGGMTVADAKRLKDLELENSRLKKLLAEAHLDIESLKVVARGKG
KB-PA_3-chr1	2720062	2720619	+	CDS	Mobile element protein	atgcaggcgcgaaccggcatctccgagcgtcgtgcctgtcagttgatcgggctgtcccactcggtgttgcgctaccagccgcgaaccagtgtgcaaaacaccgagctgcaagcccaactggtggaactggcccaagagcgccggcgctttggctatcgccgcctgcacatcctgctgcggcgtgctggcgtgcaggtcaaccacaagcggatctatcgcctgtaccgcgctgccggcttgatggtgaaacggcggcgccgccgccatggcgtcgcggtggagcgcgaacgtctgagtttgccgagcgcaccaaaccaggtctggtcgatggacttcgtcttcgatgcactgagcaccgggcggcggatcaaatgcctgacggtggtcgatgacttcacc…	MQARTGISERRACQLIGLSHSVLRYQPRTSVQNTELQAQLVELAQERRRFGYRRLHILLRRAGVQVNHKRIYRLYRAAGLMVKRRRRRHGVAVERERLSLPSAPNQVWSMDFVFDALSTGRRIKCLTVVDDFTKESVGILVEHGISGFRVTRALDEMARFRGYLKVIRTDQRPEFTGKALDQWAY
KB-PA_3-chr1	2721662	2721817	+	CDS	Phage integrase	atgagacgtacgaaggcatcactgatctatcgcaggacgaagaacctgcgggcggttcaactgctgctaggccatacgaagctggagagcaccgttcgatacctcgggatcgaggtcgatgatgccttggagatggcggaacagaccgaggtttaa	MRRTKASLIYRRTKNLRAVQLLLGHTKLESTVRYLGIEVDDALEMAEQTEV
KB-PA_3-chr1	2722003	2722518	+	CDS	RNA polymerase ECF-type sigma factor	ttgtcctctccgtctgcctccagcacccggcgcaccgagctccagaccctgtatctcgatcatcacgcctggttgcttggctggttgcgcaagcggctgcgtcatgcggataacgctgccgatctggcccacgatacattcgtgcatatcctcggcaagccactaccactgcaggagatacggcaacctcgcgcctggctgagtgtcatcgcaagaggactgctgattgaccgagtgcgccgccaacgcatcgagcaggcctatctggaggctatcgcatacttgcccgaggcggaggtaccttccccggaatcacagctgatcctgctggaaaccctcgcatgcatcgatgccctgctcgatggcttggcaccgaaggtacgcagcgcgttcctgctg…	MSSPSASSTRRTELQTLYLDHHAWLLGWLRKRLRHADNAADLAHDTFVHILGKPLPLQEIRQPRAWLSVIARGLLIDRVRRQRIEQAYLEAIAYLPEAEVPSPESQLILLETLACIDALLDGLAPKVRSAFLLSRLEGLGYKEIAERLGVSLSSVEKYMATAIRHCFLAQR
KB-PA_3-chr1	2722515	2723489	+	CDS	Iron siderophore sensor protein	atgagcagccaagagttgccggatgcggtgctcgaccaagccatcggctggctggtgcgtctgcaatcgggctatgcggacgaacaaacgctcgccgactgcctgctctggcggcaggcggaccctattcacgaaaccgcctggcaagccttgcagtccagcgaatcggccttcgggcgcatggccgaactacccggcggtgtcgcgctggatatcctgcagcgtctgcagggcaagcgccacggccgccgccaggcactcaagatgctgggtttcggcgtggcaatcagcggcctgggtggctgggggatgcgcgaacgcccgctggcaagctggggcgcagactacgtcaccggtgtcggcgaacatcagcagttctttctgggcgacggcactcgt…	MSSQELPDAVLDQAIGWLVRLQSGYADEQTLADCLLWRQADPIHETAWQALQSSESAFGRMAELPGGVALDILQRLQGKRHGRRQALKMLGFGVAISGLGGWGMRERPLASWGADYVTGVGEHQQFFLGDGTRLQLNTSSAVDVRFTAQRRTITLLRGEIFIDSGKDSDAPAGYRSLWVESRHARLQAIGTAFSVRDETNATRLRVEDGIVAIHRAEAQPIRVMAGEEYLILDSSTRQVEHSTLNASAWTRGQLVAKRMRMADLIEEIGRYRQGWLSCDPSIANLEVSGVFQLDDIDNVLDALSDSMPLRVQRFTPLWTRVVAR
KB-PA_3-chr1	2723586	2726090	+	CDS	TonB-dependent siderophore receptor	atgtcctctctttcctcgccgccgcgagcatttcgccgtgccaccctcgccctcacccttcgtagcattcttctgggtagcgccacggtcgggtcactggccagcttcgacgtgcaagccgagcaatcctccacccatcgctatgacctgcctgccagctctctggaagactcgctgaacggcttcgcccaggctgccggcatcacgctgccattcgatcccgcactgacccagggcaagcgcgcttctgccttgcgtggagaattcgaggttcaggagggcctgaactacttgctgaaaggcacggggctgattgccgaaaggaatgcgagcgggaactggagcatccgtcgagctcctgccaccgaagcggcgctggaattgagcgatcttaccgtg…	MSSLSSPPRAFRRATLALTLRSILLGSATVGSLASFDVQAEQSSTHRYDLPASSLEDSLNGFAQAAGITLPFDPALTQGKRASALRGEFEVQEGLNYLLKGTGLIAERNASGNWSIRRAPATEAALELSDLTVVGRGLGATSEGTGSYTTGSSNSATGLNLSLRETPQTVSVITRQRMDDQNLRSLGQVLQQTPGINVQSPGSERLYVFSRGLAVDNYQYDGMPTTSFAFTQALPQALSDMAIYDRVEVLRGATGLLSGSGDPSGTVNLVRKKPTSNFQGHIEAGIGSWDLYRGEVDVSGPLNASASVRGRAVAAYQQGNSFTDYLQQEKTIGYGVLEADLNEDTLLTVGLDYLRSDPRGFSTTSLPVVDSQGNQFKASRHANPASRDSTNLQESVNAF…
Additonal Region 15
KB-PA_3-chr1	2770209	2771138	+	CDS	Transcriptional regulator, LysR family	atggaccgtttgctgagcatcgaggcgttcgtgcgggtggcggaaaccgggaacttcgccaaggccgccgtgcaactcggagtgacccgttccgtcgtcacccaccgcatccagcaactggagcatttcatcaacgcgccgctgttccatcgcagcacccgccatgtgcgcctttccgaggtcggcgagacctactacaaggaatgcgcggacatggtggccggcttcaacagtctcaccgaacagatgcgcaacctgcgcgccaagccgaccggcaagctgcgcgtgcagatgctgcccggcttcgccatcgaccacttcggctcgctgctggccgagttcaccgcgctgtacccggatatcgaggtggacgtgatcgtcaacgaccgcctgaccgat…	MDRLLSIEAFVRVAETGNFAKAAVQLGVTRSVVTHRIQQLEHFINAPLFHRSTRHVRLSEVGETYYKECADMVAGFNSLTEQMRNLRAKPTGKLRVQMLPGFAIDHFGSLLAEFTALYPDIEVDVIVNDRLTDPIEEGFDIAFQMFPPQAETFIERKLFSVRRLFLASPEYLQRHPAPQRPSDLLEHRIGLYEGYPSRNRWQFQHGDETVELSLTGQVRSNSVHLLRDYALAGTALVCLPTLVAHADLASGRLLPLLVDYPLSSFNFSAVFPATQRRALKVRSLIDFLVERISDEPCWDRPLLEKGWVR
KB-PA_3-chr1	2771262	2771753	+	CDS	hypothetical protein	atgaatgccgctattcagactgtcttcggttccctgggcgattaccgcaagggctccatcgaactggtgaggggcgatgcccgccactacgccttttccaacgtcttcgaggtcgccagccgttcggcgccctacgagaaagtggtggtcggcctcaatctcggctacgtcatcgaggcgctgcgcgccgagggacgctcgccctggttcgcctgcagccacgacgaattcgccatctccctggacggcgaggtgcgcgtcgacttcctcgacctcgaacagccgccgagcgaaggcgagggcacccagttggccggcgaccagccgcgtggccggccgatgggctacgtgctgctcggtcgcggccaccaggtgctgctgccggccggccgcgcctac…	MNAAIQTVFGSLGDYRKGSIELVRGDARHYAFSNVFEVASRSAPYEKVVVGLNLGYVIEALRAEGRSPWFACSHDEFAISLDGEVRVDFLDLEQPPSEGEGTQLAGDQPRGRPMGYVLLGRGHQVLLPAGRAYRFEAARPCALLQQTILGPLSVEKWADICLK
KB-PA_3-chr1	2771786	2772805	+	CDS	hypothetical protein	atggccatgctcgatacccccgaacagacccgcaccttcgccagcgacgaggtcgaggccgggcgcccggacccgctcaccggctaccgcagcttccggctcggcgccttcacgctgtcgcgcgacgaatacttcgcccgcgtcgaatggccggccaagggccagtcgcgctcgcacctgatcccggtcgacgccttcctccgcgcgatgatgcgcgacgtggcctggggcttcttctacggctgggtgaacttcgaccacgtgatcggcacgcgcaaccactacggcaaggtcgacctctacgccgggaccttcaacggcgtgctgcgcgaggcgggggtcgactataccgagcagttcgacacgccgaagatcatggcgaccttcaaggcggtgctg…	MAMLDTPEQTRTFASDEVEAGRPDPLTGYRSFRLGAFTLSRDEYFARVEWPAKGQSRSHLIPVDAFLRAMMRDVAWGFFYGWVNFDHVIGTRNHYGKVDLYAGTFNGVLREAGVDYTEQFDTPKIMATFKAVLRDWTNASFDPFAAPEETGSAFGRKHGDNTEAIERFRIATRRMPGLPDDSPLRDDLPVNRQFLDVPQDEPELHPAEGYEGELHAFNLFKYLSRSDVTWNPSVSSVCKASLFCPTTEEFILPVFHGNDRVEWFLQLSDEIIWDVADKDDGTPRARVIMRAGDIAAMPADIRHQGYSTKRSMLLVWENATPNLPQRYESGELKPYPVDF
KB-PA_3-chr1	2772890	2774353	+	CDS	Aldehyde dehydrogenase (EC 1.2.1.3)	atgcagaacctactgttcatcgacggtcgcttcgtccccgccgtgggccgcggcgagatcgaggtgctgaaccccgccgacggttcgccgatcacccgcatcgccgccgccgaggcggccgacgtcgacctcgcggtcgccgccgcgcgccgcgccttcccggcctgggccgggttgccggcggcggagcgcggccgcctgttgctgaagctggccgacgccatcgaggccaacgccgagcaactggcccgcctggagtcgctggataccgggcatccgctgcgcgactcgcgcaacctcgacgtgccgcgtaccgccgcctgcttccgctacttcggcggcatcgccgacaagctcgaaggcaaggtgatcccggtggacgcggggttcctcaactac…	MQNLLFIDGRFVPAVGRGEIEVLNPADGSPITRIAAAEAADVDLAVAAARRAFPAWAGLPAAERGRLLLKLADAIEANAEQLARLESLDTGHPLRDSRNLDVPRTAACFRYFGGIADKLEGKVIPVDAGFLNYVQRKPIGVVGQIVPWNFPLMFTSWKLGPALAAGNTVVLKPSEITPLSTLRIAELIREVGFPDGVVNIVPGYGNTAGQRLAEHPEVGKIAFTGSTLTGQRIVEASRGNLKRVQLELGGKGANIVFDDADLDAAVNGAAWAIFHNQGQACIAGSRLILHEGIAERFLERFVALARSIRLGDPLDPETEMGPLTSALHRDRVLSFAAVAEEEGGRILTGGRAPQDPALAAGYYVEPTVVEARPGDRVAQEEVFGPFVTVLRFSTEEEAL…
KB-PA_3-chr1	2774362	2775429	+	CDS	Maleylacetate reductase (EC 1.3.1.32)	atgcggacattcgtctatcagggcctgccgagccgggtggtattcggtgacggtgcgttgcagcgccttggcgaggagatcgagaagctcggcgccgagcgcgcgctgctgctatccaccccggaccagcgcgagcttgccgagcggctggccgcgatcctcggtgcgcgtagcgccggggtctatcccgaggcggtgatgcatgtgccgctggaggtcgcccgggcggcccgcgccgaggcggcgaagcgccaggccgactgctgcatcgccgtcggcggcggttcgaccatcggcctgggcaaggccatcgcgctggagtccggcctgccgatcctggcggtgccgaccacctatgccggttcggaaatgacgccgatctggggcttgaccgaagat…	MRTFVYQGLPSRVVFGDGALQRLGEEIEKLGAERALLLSTPDQRELAERLAAILGARSAGVYPEAVMHVPLEVARAARAEAAKRQADCCIAVGGGSTIGLGKAIALESGLPILAVPTTYAGSEMTPIWGLTEDRLKKTGRDPRVLPKTVIYDPALTLSLPPAVSACSGMNAMAHAVEALYAEDANPIIGLMAEESIRSLAQALPRVVEDPADREARAQALYGAWLAGVCLGSVGMAIHHKLCHTLGGTFNLPHAQAHAVVLPHAAHYNREAAAPALARVARALGGNSAEQAGALLFALNRRLGVPVSLGELGLPPEGPAEVARIACASPYYNPRPFERQAIQALLERARDGLPPA
KB-PA_3-chr1	2775426	2776316	+	CDS	Intradiol ring-cleavage dioxygenase (EC 1.13.11.1)	atgacggcgagttcgggcggaggagaccatgcgagcgacggcgaacgccggatcactgcccaggtcctcgccagcttcgccgccgcgcccgatccccggctgcgccggctgctggaaaaactggtggagcacctgcacgccttcgcccgcgaggtggagctgagcgaggaagaatggttcgccgcaatagccttcctcaccgagaccgggcagacctgcgacggcctggtgcgccaggaattcatcctgctgtccgacgtgctcggcctgtcgatgctggtcgatgcgctcgaccatcgccgcagtggcggggcgaccgagagcaccgtgttcgggccgttctacatcgccggcatgccgcagcgcggatacggcgagaacatggccttcacggcgggc…	MTASSGGGDHASDGERRITAQVLASFAAAPDPRLRRLLEKLVEHLHAFAREVELSEEEWFAAIAFLTETGQTCDGLVRQEFILLSDVLGLSMLVDALDHRRSGGATESTVFGPFYIAGMPQRGYGENMAFTAGVPALVMGRVLDAQGRPVVDACLEVWQSARNGCYSGQDATQPHGNLRGRYRTDGEGRYAIRSIVPTSYPIPSDGPVGRLLQASGRHPWRPAHLHFMIEAAGHRRLVTHLFKHDDPYLASDAVFGVKDSLRVEYQGCPAEHPLAQAFGIDTAFCLVRYDFVLERA
KB-PA_3-chr1	2776313	2776624	+	CDS	YciL protein	atgagtcgttatttcgcggtcttcgccaccgaccggccgcagctcgagagcctgcgccggctgattcgcccggcccaccgcacgcacctgcgcgatccggcgccgcaccgggtggtggtacgcctgggcgggccgacgctggacccgggcgacgggcggatgaacggcaccctgctggtggtcgaggcggcctcgttggacgaggtggaggcctttctcgccgacgacccctacgttcgcgccggcctgttcgagcgtatcgagatccgtccctggagctggagcctgggggcgccggaggcgctgtcgtga	MSRYFAVFATDRPQLESLRRLIRPAHRTHLRDPAPHRVVVRLGGPTLDPGDGRMNGTLLVVEAASLDEVEAFLADDPYVRAGLFERIEIRPWSWSLGAPEALS
KB-PA_3-chr1	2776621	2776965	+	CDS	Ferredoxin subunits of nitrite reductase and ring-hydroxylating dioxygenases	gtgaaggtcgcgacggtgccgctctgcgctctcgaggagatccctgacggtggcgcccgaggcctgcaatgcagccgcgacggcgagcagctgtcgctggtcgccgtgcgccggggcgagcaggtctgggtctaccgcaaccgttgcccgcatttctccgtaccgctggacttccgccccggcgaattctgcacctatcggcgtcaggtgctgatgtgcgcccatcacagcgcgttgttccgcttcgaggatggcctgtgcatcgacgggccctgcgcgggcgcggcgctggagagcctgcgttgccggatcgaggacgggcggctggtgctgctgggcgactga	MKVATVPLCALEEIPDGGARGLQCSRDGEQLSLVAVRRGEQVWVYRNRCPHFSVPLDFRPGEFCTYRRQVLMCAHHSALFRFEDGLCIDGPCAGAALESLRCRIEDGRLVLLGD
KB-PA_3-chr1	2779250	2776980	-	CDS	TPR domain protein	atgcgcatgcccttcgtacccgtccgacgagacgtccgcccatcccttccccgccgtcgcgccagctactactgcacgggcctgctctggagcgtggcgctgccgtggcttccggcgctcgcggcgagcgccgccgacggcctggtcgacgaagacgcctgccaggcctgccatccccggcagagcgaacagtggcgcggatcgcaccaccagttggcgatgcagccggccagccccgagagcatcctcggcgacttctccggcgtgcgtttcaggcatgccggggaaaccacccgtttctaccgcaagggcgacgcgttctgggtgaacactgccggtgccgacggcaggaatgccgacttccaggtgcgctacgccttcggcgtggagccgctgcag…	MRMPFVPVRRDVRPSLPRRRASYYCTGLLWSVALPWLPALAASAADGLVDEDACQACHPRQSEQWRGSHHQLAMQPASPESILGDFSGVRFRHAGETTRFYRKGDAFWVNTAGADGRNADFQVRYAFGVEPLQQYLLDTGDGQLQALGVAWDSRRKTWFHLYPDDAVDARHPLHWSKPQQNANFMCMECHNTGFTRRYDASAERFDSRWHATGVGCQSCHGPAAGHLAWTRQPERAQAHAGFAGSLAATENRFQVESCARCHSRRSPLGDGFDATARLLDDYLPSPLSPVLYELDGKIKDEVFEYGSFVQSRMYAKGVACSDCHDPHGARLKADGNGVCLQCHNPAGRAVRRDIDASGLAAADYTSPAHLRHRADGPAGQCVACHMPGKYYMVNDLRHD…
KB-PA_3-chr1	2779509	2781197	+	CDS	Arylsulfatase (EC 3.1.6.1)	atgagcgcaatgtcccgaaaggccctgagcctgttgttccccttgctttgctgcgtggcccagagccaggcggcgccgtcgcggccgaacgtcctgctgatcgtcgccgatgatctcggcttttccgatacctcgcccttcggtggggaaatctccactcccagcctgcaggggctggccgacgagggtgtacgcctgaccaacttctacgccgggccgacctgctcggtgagccgttcgatgctgctcaccggggtcgacaaccaccaggccgggctcggtaccatggccgagtacctgcagccggagcagaagggcaagccgggctacgaggggcaactgaaccggcgcgtggcgaccctcgccgagctgctccgcgacgtcggctacaacaccttc…	MSAMSRKALSLLFPLLCCVAQSQAAPSRPNVLLIVADDLGFSDTSPFGGEISTPSLQGLADEGVRLTNFYAGPTCSVSRSMLLTGVDNHQAGLGTMAEYLQPEQKGKPGYEGQLNRRVATLAELLRDVGYNTFMTGKWHLGATPESNAAARGFERSYTLMPGGASHMDKTQMFPGNYKARYLEDGKDVSIPDDFYSSDFYTDRLLGYLERDRQPGKPFFAYLAFTAPHWPLQAPDEYLDRYRGNYADGYEALRRKRLARMIELGILPAGTRPNDPLADKLPTWEQLSEAQRQEQTRIMQIYAAMVDNMDHNIGRVLEHLRKSGELDNTFILFMSDNGPESASPESLGTTEDRNGIRDWVDATFDNSPRNMGRKGSYVTLGPGWAQVGATPFPYFKSFTA…
KB-PA_3-chr1	2781325	2782740	+	CDS	hypothetical protein	atgaccggacatccgatccccctttcgctgcgcggcctgttcggcggcgtcctggtcggcctgctggcgccgctggccgatgtcgccgcggccgacggcctggaacagcaacggccgttgcgcccaggcctgccacgctggctggaggactaccgcttcctcgacgagccgcgccagcgcaccgatccgttcgacgcgctgcgctaccagcgcctctccgagtcggcctggctgcagctcggcggcgagctgcgctaccgcgcggacgccgtcgagtcgccgtacttcggcctgcgcggcgacgccgacgactcctacctgatgcagcgcctgcaggcgcacgccgacctgcacctgctcgacggccggctgcgtctgttcacccaggtgcagaacacc…	MTGHPIPLSLRGLFGGVLVGLLAPLADVAAADGLEQQRPLRPGLPRWLEDYRFLDEPRQRTDPFDALRYQRLSESAWLQLGGELRYRADAVESPYFGLRGDADDSYLMQRLQAHADLHLLDGRLRLFTQVQNTRAWGKDTLAPPDESRTDIQQAFVDARFEVAGADLTTRVGRQEMAYGAQVLVTYRDVPNVRQAFDGVRLSVSWAEDTRLDAFAVRPVRLGRDAFDDGSDNQVKFYGLYGSLPLWRAWHVDLYAFGLDTRQRSLAGLSGSEKRYTLGSRLFGKQGALDWSWDLAGQFGRLAGASIRAWALSSDSGYTFATAWKPRLGLRLDAASGDRKAGDGRVQTFDPLFPRNGVYGEAALITLSNAIIVGPVLGFSPWPQLRIEPGLFKVWKQRAG…
Additonal Region 16
KB-PA_3-chr1	3442090	3443559	+	CDS	possible recombinase	atggccaaggcctactcttacatacgcttctcctcagcaaagcaggcgcagggatcatccctggagcgccagcaagagaacctgagcagattcctagcagaaaacccgcaatatgaactagccgaaacccggttcgaggatttagggatttcaggctggtcaggtgagcacctaggccacggcctgggaaagctccaggctgctgtgaatgctgggattattgaggcgggggatatcatcgtcatcgaggcgattgaccgcatatcgcgcctccctcttgaagacgctgtaagcctgactagcggcatcctgaacaaaggtgtggctatacacacggtggaggatcgcaccacctacgacaaaaccacataccggcaagggcatacggccctcgcactg…	MAKAYSYIRFSSAKQAQGSSLERQQENLSRFLAENPQYELAETRFEDLGISGWSGEHLGHGLGKLQAAVNAGIIEAGDIIVIEAIDRISRLPLEDAVSLTSGILNKGVAIHTVEDRTTYDKTTYRQGHTALALILKTFASWEYSERLSERVKASYSKRAEAVRKGETIRRKNACWHTSDGKVVEEVAVHIRWMFEEYIAGAGVRRLAGEMMGRHPAFARVNPSHIRRWLRDKSLIGTWAKRDGEEVPGAFEPVLTPDVFYQAQALMNPQKNYTHPAKNFLTGLVKCQECGGNFAVKSQGTGNPFMGCYARTYHRCTNGTSIPLLVLHRVVMEEALDYIEDGIRASRLGEHDKHRLVVQGKLEEVQRGINGLSEAIAAHGFMPELNAKLAELKVTRTSLE…
KB-PA_3-chr1	3444982	3444707	-	CDS	hypothetical protein	atgttcctctctcgacaacacacccacacagattccgagcttgagcaacagtttgcccaggcactccagcgcgatgaacttctggcaaaggtgaaggcccaggaagcgcgattggctcagcagcgagcgaaggaagcccaggagcaggccaaccttgcagctagtcggcgagtgctcaccaatcccaacgccggtcttctggacaagattgaggcagccgggcgagctgctcaggaggaagctttgatccggtggcgacaggcagggaaccagtaa	MFLSRQHTHTDSELEQQFAQALQRDELLAKVKAQEARLAQQRAKEAQEQANLAASRRVLTNPNAGLLDKIEAAGRAAQEEALIRWRQAGNQ
KB-PA_3-chr1	3445208	3445864	+	CDS	hypothetical protein	atggggcttagtgaagaagaggatagcctgctgtgtgccgttatagcgcatgaatcgatcttatgcgataaggcgtatagggagttcctgtatacggaattccgtttggctcatggaggtaacgatgtcaaggagatacttcttgcgcacggtgcttttcaagcttttgtacaccatctgtacgagctttgtattgcgctaactcagcgtgagctaaagaatattaagcaaataaaatacgaagtcgcagataggcacatcagcgtgatggtggagaaaatttggaacgttgagcggaggaagtcagactcttccctatctgggatgactgaagcggaatttcgcgacggttataatgacttttctaagcgctttagaagggcaagaaacaactcggct…	MGLSEEEDSLLCAVIAHESILCDKAYREFLYTEFRLAHGGNDVKEILLAHGAFQAFVHHLYELCIALTQRELKNIKQIKYEVADRHISVMVEKIWNVERRKSDSSLSGMTEAEFRDGYNDFSKRFRRARNNSAHALIGRARGGQSLDEFYSKYWVMLKLLFEYSTKWWRAIDVEGVNWHDIGKFNIRQIALQSVHEHLLSLGKQGLPVPSNKKESPAG
KB-PA_3-chr1	3446146	3445931	-	CDS	hypothetical protein	atgccctctcaaggctccgtgcgctgggaccgcgttaactcccactccgccatcgtcgacctcctcgatatggcttacaactccatccgtgacaatcgcctccagcacgccccaggtgctgacctggtggctctggagatgaagcagcaggggatgccctggagcgccgttacagcgcgtctccggtccatgtatggcatcagcccaatccgataa	MPSQGSVRWDRVNSHSAIVDLLDMAYNSIRDNRLQHAPGADLVALEMKQQGMPWSAVTARLRSMYGISPIR
KB-PA_3-chr1	3446975	3446760	-	CDS	hypothetical protein	atgatcgacgagatgtccaacacccagcaaaccccggctgtacggctcaagatggctgagaaggtgtttgccagctacctggcagcgctacgggctcaggcggcactgaaagccaaggccgataggctgagccaggaaacctcggagtcacaggagccttcggaggagtccactgtggtgttcaccacttctttccagccccatgccgccgcctga	MIDEMSNTQQTPAVRLKMAEKVFASYLAALRAQAALKAKADRLSQETSESQEPSEESTVVFTTSFQPHAAA
KB-PA_3-chr1	3448395	3447706	-	CDS	site-specific recombinase, resolvase family	atgcaagtcgttgcctactaccgtgtttccactggcaagcaggaagcctccggcctcggcctggaagctcagcgggaatatgtaatggctgctgctcgctcccagggctgggaagtggtgggagagttcacagaggccgtgtctggtgctatccgccccttggatcgccctgagtgctccaaggcgtttgccacaggcttccctgtggtagtggccaagctcgaccgcctgagtcgtgacgtggagcatgttgccggcctgatgaagagccatgatttcaaggtggctaccatgcccaccgctgacactttccagattcacctattcgcagccctggccgagcaggagcggacattcattcgggctcgcaccagggaggctctggcagcccttcaagcc…	MQVVAYYRVSTGKQEASGLGLEAQREYVMAAARSQGWEVVGEFTEAVSGAIRPLDRPECSKAFATGFPVVVAKLDRLSRDVEHVAGLMKSHDFKVATMPTADTFQIHLFAALAEQERTFIRARTREALAALQARADSGDAEAQAKVERRREAGKKAVVTGHAREATQARVSSFLSSIKDAVELALFKGASTLQGVADALNAKGVTTARGGRWSPTQVSRVMDRLNLSFS
KB-PA_3-chr1	3449014	3448532	-	CDS	hypothetical protein	atgaaagtcattccctctttcccgcgttacatgatttccccaaccggtgaggtgtgggacacgctccgggagcagttccagcccgttcaggatgtgcgtggttatgcctctgtgactctttcccgtcgcccggatcagcctcgccctatcctgaagtcagtggcctccctgctgctggagacttaccaaggaccttccaccgacccccgtcgccaggtggctaggttcaaggaccgtgatcgctctaacctgagcctggacaacctgtattggggcaccagtggcaagccagagttggaggtgtatgtaggtgatggggagtccgtccgagcggctgacatcctcgaagctgtactacctaccctggacgccaagacgcgggtgaacgtctccgcctcc…	MKVIPSFPRYMISPTGEVWDTLREQFQPVQDVRGYASVTLSRRPDQPRPILKSVASLLLETYQGPSTDPRRQVARFKDRDRSNLSLDNLYWGTSGKPELEVYVGDGESVRAADILEAVLPTLDAKTRVNVSASLAKGHSIGHALLHLLGVPSSGEVRAGA
KB-PA_3-chr1	3450506	3449739	-	CDS	hypothetical protein	atgtccctcgctctagtcgcccccaacggcgatatggtttatttcgacgctgtgttgaactggaatcgctccagccaatcccaggtgacgcagttcccaaccgaagccggctcagtgatcgctgaccacgttgtaaatcagaaccggaaatgcaccctaaacggtgtcatcagtgacgcagatttcaacctcacacgccccgcattcaccgcttcggaccttcagcaaaacggcatcacaccgaagcccttcgtgaacaactcccctgtaggtgacaccatccgaatcaccccaggaacagacagttcctggagccagttcctcccggagacactagcgcagtggactgactctgatcgcccccaggtagaagttcagagccgagtttatgcacgcctg…	MSLALVAPNGDMVYFDAVLNWNRSSQSQVTQFPTEAGSVIADHVVNQNRKCTLNGVISDADFNLTRPAFTASDLQQNGITPKPFVNNSPVGDTIRITPGTDSSWSQFLPETLAQWTDSDRPQVEVQSRVYARLAREIAEDIQALQRNREQVTILDFGTAGLIQHVHKGLIITSLEFPENAETGDGVYLNITFEQIQVTATVLEETPRNVAEAVKNQTAKRKELGSKNAKGERTVDPEGLDPNKETELAKIRNRDL
KB-PA_3-chr1	3451313	3450567	-	CDS	hypothetical protein	atgagcagcctatcagaaatcatcggcattctggccgataaccgtttgaacactgtaaacactgccatccccggttatatcgtcaaggttcaccgggataagatggctgtagacgtacaaccctccatcaacgaaatggatgaagatgggaccacccgtcgccggcctatcctgctggatgtgccttacatgttgcccatgacagaaaacagcgccgttctaatgcctgtacatgaaggagattttgtcttggtagtgttcggcatgcgtagcatggataacttcaagcacggcaccggcatggagaccaagcctacagatcgccggcaacacgccattgacgatggagtggccatcattggccttcgcccattctccaagagcattaaccgccccagc…	MSSLSEIIGILADNRLNTVNTAIPGYIVKVHRDKMAVDVQPSINEMDEDGTTRRRPILLDVPYMLPMTENSAVLMPVHEGDFVLVVFGMRSMDNFKHGTGMETKPTDRRQHAIDDGVAIIGLRPFSKSINRPSAWKHDHNQFDLVVVHNLGSATECEIRMSESGNVTVNTDQDFTVNARSITLNGQQGVSIKTPTLAVEAQATTWTGNITHSGNYVQTGVSTFNGIPFHTHIHGGVMPGSGTTAVPQA
KB-PA_3-chr1	3451789	3451310	-	CDS	hypothetical protein	atgtctggtaaggctctgactggagcccccaaggaagccttggacaacctgacacgggcttatgatttggaatggaccattgctgatggagccctccacatccagcccatcgacggctacagaggcgtatatggccaggctgttcgcatcgcccctgagagtggcttgattggctcccccttcccctggaacggcaccaccggcaggaagaagaagagtccgaacaacattaccggcttgcagtttaaaaccctcctcctgagccgtcttcgccccggggagttggtccaccttgtgagcagggaacatgactcctatctcaaggttcaaaacatccgctattacggagactaccgtggccagaattggaactgcgacattcaaggactccaggtagta…	MSGKALTGAPKEALDNLTRAYDLEWTIADGALHIQPIDGYRGVYGQAVRIAPESGLIGSPFPWNGTTGRKKKSPNNITGLQFKTLLLSRLRPGELVHLVSREHDSYLKVQNIRYYGDYRGQNWNCDIQGLQVVPTAQDASRADRQTFANSQQRPENSPQ
KB-PA_3-chr1	3452280	3451789	-	CDS	hypothetical protein	atgcccgccagtgtcctggcctcttaccctaacttcctccgggagtaccgtttcacctgcgttgatcctgccaagccaggccaatccctggtgattaactccggagataacggcttacaactacgcttcgacatcacccgaagcgctagcaataagtcgaagctgaacaccgctgtgtttgaaatctacaacctgaatcagcagtcccggaccctgatgtctgccccttacctcttcgttactctggaagttgggtataaaggccaggaactgattaccatcttctccggtaacatcaccagttacaccacccgatgggaaggcaccgataacgttacttctctgactgttggagagggtttcatcccgattaacgaaactcgactcatgggcaccata…	MPASVLASYPNFLREYRFTCVDPAKPGQSLVINSGDNGLQLRFDITRSASNKSKLNTAVFEIYNLNQQSRTLMSAPYLFVTLEVGYKGQELITIFSGNITSYTTRWEGTDNVTSLTVGEGFIPINETRLMGTIAPGSTVRDMLNRIVTQMPGIVPGVWSGIAR
KB-PA_3-chr1	3453310	3452291	-	CDS	hypothetical protein	atgaaagctaaacgctgcaagttctgtcgttgttccatcccattgactcgcactagcaaagctctgttctgctccccggagtgccaggtgaaagccaaaagcaccaagggtaagactgccactgcccaccgccgcactgagatgcagaaggcctacggaaacgccttcttctccatgatcgccagggagtgccagcgagccggaaccgttcaaatcatgcagggccatactctggagtctttgacctcgctctacagcgtctggaaacgcctccaccgcattaacgggaacagctccaacggcgttaagtacgaattggggcacatctgccctgtgaagggtgtgaccaaggcaggcgttctagccgccgacaacgtggttattcagcccgctgagcac…	MKAKRCKFCRCSIPLTRTSKALFCSPECQVKAKSTKGKTATAHRRTEMQKAYGNAFFSMIARECQRAGTVQIMQGHTLESLTSLYSVWKRLHRINGNSSNGVKYELGHICPVKGVTKAGVLAADNVVIQPAEHNRKHGASHFGLGRWIEHNALLPEWAVGETSKKEAVINKLAKLLGKATIESFVKLHKLKTTRKIQLLDKLSGMAGHEFSPSQLDKMSTQALEALKCSIDGTKERKAGTFKEDSFVWTPDLVLRDELARLSRYYPELAPVAQVVLDWTVSTAEQVEGTLATRYMLDTDFQRIIAQGFDMALGAKPCPRTLTKMLDAANDSYMAFVLAA
KB-PA_3-chr1	3454085	3453693	-	CDS	hypothetical protein	atgaatcatccaaacatcatcgctggccttctgtctcagattcgccgagcagttcccctcctcgccctggtgttcttcaccgcctgggctggggccgtggtaggcaatgccggcattcggtcggacttcgcctatgttcgggaggtttccaatctccaggggcacaacattcagcagctagccgaccgggtggaagatcagcgtaagttcttcaatgactccctggacgaaatggccaagaccaccgctagggtgttgaacacccgtctggatagcatggaagcccggctagaagcccatggtaatcagcttcgcctggtgctcgacagtttgtcccatgcacccaagccagcccaggtggaaggaaagtcggagaacgtagcccttcgatag	MNHPNIIAGLLSQIRRAVPLLALVFFTAWAGAVVGNAGIRSDFAYVREVSNLQGHNIQQLADRVEDQRKFFNDSLDEMAKTTARVLNTRLDSMEARLEAHGNQLRLVLDSLSHAPKPAQVEGKSENVALR
KB-PA_3-chr1	3456481	3454190	-	CDS	hypothetical protein	atggcacagaccgaagaaattaccaagctagttggccgcattgaatggcgagcggataacgcgcctctgctggccttccgtaagaaccttgaagctgtcacccgtcagcttcgcgaaatcaccaccctggctaacaaacgcatcaaactgaacttcggaatgggtaatctccaagttactggccgagcgcttcagaagatgtcgaagcagcagtttcaagatgctctgaagcatcagaaactccagttcaacggtgctcagcaagctatcaagctggatgccgaacgtaatagggccaatgttcaggcccttcggactcaaggccaggagcaagccaatcaacaccgtgctcagatgttcaaccttcgcagggaacaggctgagttcatgcggaactcc…	MAQTEEITKLVGRIEWRADNAPLLAFRKNLEAVTRQLREITTLANKRIKLNFGMGNLQVTGRALQKMSKQQFQDALKHQKLQFNGAQQAIKLDAERNRANVQALRTQGQEQANQHRAQMFNLRREQAEFMRNSRQRIQAARESQQLAAIQQRAHLATQRFQAGMGRLQASPLAQGIRSAGNAVGGGISALLGSAGIAAGGLLSVGAAASAAVLGLKSIADRAAEVSDQTLTRRAQLEVATNGNTEMAKALGDQVYDSINYLGESFETMGPEWVKTIATLSREGLSNRNSLQIMQGLGAYAKTMGVSGERQALVIRGIQQAIGKGQLYSEEWRGQIAESLPGANSMGAQAWARVTGSKATGEEAVQQFRKAMEDGKITGQKLQKFLMNVASTMESSAYAG…
KB-PA_3-chr1	3456903	3456577	-	CDS	hypothetical protein	atgggcaagagttactcgaatattcccccggagcagcaagccaagcgggaattgaagtttcttaaaaagctgtactccttggacagcccaaagccggggcattatcccatgcctccatatcactaccttacattgcgggaagttgagcatggcctacccgaggcgcttcgccgagtcctccgcctacccaatgtcccagcggttatggatcgcttatttcttcgcaagataaccattgaccagggccgtcaggcctattacgccgctcaggtgtctagactgctcaagtatcagacccctcggttaacacatcgcaaagcggcatga	MGKSYSNIPPEQQAKRELKFLKKLYSLDSPKPGHYPMPPYHYLTLREVEHGLPEALRRVLRLPNVPAVMDRLFLRKITIDQGRQAYYAAQVSRLLKYQTPRLTHRKAA
KB-PA_3-chr1	3457313	3456903	-	CDS	hypothetical protein	atgaccaatccgctacatgacgacgccctggtggcctactataagaaacagtacggcgtcgaggacaaacccgcccccaccaccgccgagcgcctcaaggcaatgattcaggccaagggtgaagaccctcagtatggtcgcctgaccaccgccaaagccgcagagttgaaacgcaacagcctgaagcgtctggactctgacctggtggtgaaaagcctgtctcctgtagctgcgaatatcaccaaggctttcttgagcactggcgaagagttgaccccaaccgccatgacggtgattagccagctaactctggaagtgagtaaggcagccgcagatgggattccttcgactgatgccgaagtgcaagccctggtcgccaaggctgttgccaatctgcga…	MTNPLHDDALVAYYKKQYGVEDKPAPTTAERLKAMIQAKGEDPQYGRLTTAKAAELKRNSLKRLDSDLVVKSLSPVAANITKAFLSTGEELTPTAMTVISQLTLEVSKAAADGIPSTDAEVQALVAKAVANLRGAK
KB-PA_3-chr1	3457486	3457310	-	CDS	hypothetical protein	atgattgctgacacctctttcatccaagcctgtgatgaatacctccaggcattggatgacatcagcatcgccctagcaaaccccgaactaaccgaatctcagaggcaggggattatcagtgccagccatgacctgactgactctttcctctccattttgaaggacctaacagcatga	MIADTSFIQACDEYLQALDDISIALANPELTESQRQGIISASHDLTDSFLSILKDLTA
KB-PA_3-chr1	3457773	3457486	-	CDS	hypothetical protein	atgaaagtgaccactctgaaagcccaggcattgtccgccctgaccatcttcaacaccgctgttagcgtcggctacatgaccgaccaccagaaagctgaagctcagcgacttctggacgccctcgccgctgagactgtggatagttacgccgcaggactggtgaaggaggcagagggacattttcattcgttcctgaccgcccccagctaccgccaccagggcgccaccctgggcaatgcagccggttgcttgtttgtctacgcccacctctaccagaaggccgcgtaa	MKVTTLKAQALSALTIFNTAVSVGYMTDHQKAEAQRLLDALAAETVDSYAAGLVKEAEGHFHSFLTAPSYRHQGATLGNAAGCLFVYAHLYQKAA
KB-PA_3-chr1	3458976	3457843	-	CDS	hypothetical protein	atgaacgcacaaactcaattcattgaattccacaagttcgatgctgatgaactggcctcccgaattgagcaagtaatgctcacctatcaggccgctactcttccgttcgctccgatgttctatgatgatcggatttcccggttccaagttcacgttggtgatgaagaagcctgggaccaggaacatggtcgtaatttcaagaaggaagtgcttgaaactcgggaagagttggtagagggctccagtgtctacgccagccttcgcgacattatggaagttccaaatgggaagttctccagcctgccgcacttctacgttgagaagaaagcatattccctggctgaactgttggatgttcacgccaaagccttggaagaaggccgtgacctgatccgcccc…	MNAQTQFIEFHKFDADELASRIEQVMLTYQAATLPFAPMFYDDRISRFQVHVGDEEAWDQEHGRNFKKEVLETREELVEGSSVYASLRDIMEVPNGKFSSLPHFYVEKKAYSLAELLDVHAKALEEGRDLIRPWIEKGGPTQQPVLNYALGSTKAEQAAAYEVFAELVEATYRAELVEKNKAETEARIQAAIAERRRIAAEEEAARLRREEEQARAAVLAEGDSILAQLAAEQAAQEARAAEEAAEQARAAERAQAAQAAAELAAELEGCAIGADKVEFLSSLFTRKLAEAQLDEDEIDTCLKVIRDALVGDCLTTPAWDSFSEVFNVDRLAAQAYSDVTNGAKQGAKQAQAFGQALDDGISSPVLVRFLEALAGKF
KB-PA_3-chr1	3459257	3458988	-	CDS	hypothetical protein	atgattcattaccttgtgagggaaaagggaggaagccgctacgtcactcacgaagcgtttgatgatcccagggcagcagatcgccgttacctgcccacccaaggagtgatcgagctaattccagggaaacctgaagtggtctatctcgaaatagatcgggctgatgaagccatggtttccaagttctaccaactcaagaaacagggccacacattcccgcctgtagcgctggtgaagaaggcccgccataaccacttaaagactgtctag	MIHYLVREKGGSRYVTHEAFDDPRAADRRYLPTQGVIELIPGKPEVVYLEIDRADEAMVSKFYQLKKQGHTFPPVALVKKARHNHLKTV
KB-PA_3-chr1	3459766	3459254	-	CDS	hypothetical protein	atgcccaagcaagttaaacccctgatgaaacctatccccggattcaacggcgactattcgataactctcgatggccaggtgttcagtaataggcgggaacaaccttataaaatgagtatccggcgcaagggaaaccagccgcctcgataccatctctctgttccagggaagggccaatgctcctacaccgtggcatctctgctgcttaaaaccttccagggcccttgccccaagggatatcaggtcggctaccacgatggggatgtcaccaacttctctcttcccaatcttcgctggattcgtcaagggactcgaagccctcgccgcctggtcgagttccaaggccggcgaatgggtgtcaaggaagccctcaccatcggttatccgggtttcagtgat…	MPKQVKPLMKPIPGFNGDYSITLDGQVFSNRREQPYKMSIRRKGNQPPRYHLSVPGKGQCSYTVASLLLKTFQGPCPKGYQVGYHDGDVTNFSLPNLRWIRQGTRSPRRLVEFQGRRMGVKEALTIGYPGFSDLSPQEQRVVYNRVRSRMRGCNFQEALARYVQAHGWLK
KB-PA_3-chr1	3461280	3460684	-	CDS	hypothetical protein	atgtttaagaaagctgtggccatgatggcccttcctgtcgcccttggaatcactttccacgctcaagcggccggcttatccgccaaggctgaccccgtggcactagaggtttgtacggcctccctcggcgttctgagcggtaaccgtgcccttgttcgctacatccgtgccaaaactccccattggctgatcatggaagcggttagcgcttcccgtggaaaggtacagtcctgggagtgcttgcacgacgctccagagaagaaggtcactttccgcaacccttattctcaggaaactgacccggttttcgcaacgtattcagacgctccaacgggccctgcttacatgatccgggatgcagtaggtaattggggtatttatgaaagccccggcatagtt…	MFKKAVAMMALPVALGITFHAQAAGLSAKADPVALEVCTASLGVLSGNRALVRYIRAKTPHWLIMEAVSASRGKVQSWECLHDAPEKKVTFRNPYSQETDPVFATYSDAPTGPAYMIRDAVGNWGIYESPGIVADLGPFSYTDPAQQRCQALAAKKFGVPAFTVEIGKRDEELSDSMATYRLKGRVLLRTCSGLLNGL
KB-PA_3-chr1	3461900	3461628	-	CDS	hypothetical protein	atgacccgtattctgaccgctctgctcggcattcccgcgtcctactggaccttcctgagggtgagtcctgctcgctggatcaccctggcccctgttgcgctgttggtggtttgcctggctactccgactggacgtgtcgtgctccagcacaaagcgccagagctagtaccgatcacgggtgcgtttggactcccaggtttggccgtcgatgtctccgcactcaccgtccaagtatggggtgtcctgcgacagcgcccaggaggtgagccgtga	MTRILTALLGIPASYWTFLRVSPARWITLAPVALLVVCLATPTGRVVLQHKAPELVPITGAFGLPGLAVDVSALTVQVWGVLRQRPGGEP
KB-PA_3-chr1	3462490	3461903	-	CDS	hypothetical protein	atgaaagacattctcaagcgtactgcaaccctggtgattcgctattccatccgtggcctgggcggtatcgccaaactcctggggaactgcctccgagcttacgggcgcttcctggctgtgtcccccacccgctgggtgactctgatccctgtggccttcgtgttcttcgccgccctggatcaaatgggatgggagtccccgaaacgctccaccagctactcccaggccgtggccgctcctgtggttcaagcctccccgctggaattgaagctgcgggaggtgggcatggctgacctctgcaagaaggcgatattcctggagtacgacaaggacgaattccttgcagagattcaggatggaagcatgtacgccgtcgcctggcagggcttgggcgaagct…	MKDILKRTATLVIRYSIRGLGGIAKLLGNCLRAYGRFLAVSPTRWVTLIPVAFVFFAALDQMGWESPKRSTSYSQAVAAPVVQASPLELKLREVGMADLCKKAIFLEYDKDEFLAEIQDGSMYAVAWQGLGEASCHFGPGESLDSVAVLKHQQRGVVPLLSSLPGYAEYRFTLAEDGDLDWERLWMPNRNSQGGK
KB-PA_3-chr1	3463283	3462543	-	CDS	hypothetical protein	atgaccaagacctccaaaatcactatcgaacgcagtatttccacgcttagggccaccgacgtaactgagggtcaggatgtagtcctcacctaccaggggtggggcttcgtcatcagccgcaccaacagcaccgactcctggcggggtgatttcactctcaccactccggatggtgttcagcgtcagggctgcctatcggacgtgaaagagtccatccgccttttctctggtgccatggctgaagaaggccacacccctgacagcttccgtagccaggtggaggcggaacaggctcaggcagtagccgaagctcagggtgatcccgtggactccctcgccctggcgaatgcccttgaagctggtccggttgaaagagacggatgccggctgactttggaa…	MTKTSKITIERSISTLRATDVTEGQDVVLTYQGWGFVISRTNSTDSWRGDFTLTTPDGVQRQGCLSDVKESIRLFSGAMAEEGHTPDSFRSQVEAEQAQAVAEAQGDPVDSLALANALEAGPVERDGCRLTLEGDSYVMTSRCGERNTLWTGATTPARLLAHWDGFVSNTRERAVCRLEEPEVVVRLVDPAKPEPITTHPAKASYIAGNLAGVVLLCDCQASVGLVPRIAGVGWENATCTNHRFKH
KB-PA_3-chr1	3463656	3463312	-	CDS	Putative ring-cleaving dioxygenase	atgtcccccaccctcacccacctggcgctgcacgtccccgacctcgacgcctgcatcgccttctacgaaaccttctgcggcatgcgggtgatccaccggcgccccggcaaaggctcgcagatcgtctggatggccgaacccggccaggaacaacgcttcatcttcgtcatcatgcccggcggccagccgcgcaacctggccagcgacgactacagtcatttcggcttcgccctctccagccgcgcagcggtggacgatctggcgcgccgcgccgaggccgccggctgcctggtctgggcgccgcgcgacgagccctatccggtcggctactactgcgggcaatga	MSPTLTHLALHVPDLDACIAFYETFCGMRVIHRRPGKGSQIVWMAEPGQEQRFIFVIMPGGQPRNLASDDYSHFGFALSSRAAVDDLARRAEAAGCLVWAPRDEPYPVGYYCGQ
KB-PA_3-chr1	3463801	3465156	+	CDS	Glutathione reductase (EC 1.8.1.7)	atgtctttcgatttcgatctgttcgtcatcggcgccggctccgggggcgttcgcgccgcccgcttcgccgccggcttcggtgcccgtgtcgcggtggcggagagccgctacctgggtggcacctgcgtcaacgtcggctgcgtgccgaagaagctgctggtctatggcgcgcatttcagcgaggacttcgagcaggcccgggcctatggctggagcgccggcgaggcgcagttcgactgggcgaccctgatcggcaacaagaaccgcgagatccagaggctcaacgggatctaccgcaacctgctggtgaacagcggggtgaccttgctcgaaggtcacgcccgtctgctcgatgcgcacagcgtcgaggtggacggccagcgcttcagcgccaagcac…	MSFDFDLFVIGAGSGGVRAARFAAGFGARVAVAESRYLGGTCVNVGCVPKKLLVYGAHFSEDFEQARAYGWSAGEAQFDWATLIGNKNREIQRLNGIYRNLLVNSGVTLLEGHARLLDAHSVEVDGQRFSAKHILVATGGWPQVPDIPGKEHAITSNEAFFLERLPRRVLVVGGGYIAVEFASIFNGLGAETTLLYRRDLFLRGFDRSVREHLRDELGKKGLDLQFNSDIARIDKQADGSLAATLKDGRVLEADCVFYATGRRPMLDDLGLENTAVKLTDKGFIAVDEHYQTSEPSIFALGDVIGRVQLTPVALAEGMAVARRLFKPEEYRPVDYKLIPTAVFSLPNIGTVGLTEEEALSAGHKVKIFESRFRPMKLTLTDDQERTLMKLVVDAHDDRV…
KB-PA_3-chr1	3466530	3465193	-	CDS	O-antigen chain length determinant protein WzzB	atgcatgctcctcagtcttcggattcaaatcacacggaaatcgaccttgcccaactgttcgagcaatgctgggcatccaggcggtcgatcgcactcatcaccgccctgggcaccggcgcggccctggcctatgccctgctggcgacaccgatctatcaggtggacgtcctgctacgccccgtccagaccagggcactggaagccttaaacatcaaaggtctctacagcatcacgcccaagcaggcgctcgatcgagtgagcaatgaactgacggcgtattcgggtaggcggacctatttcgaagcacacccggagcagttcgaacaactggaattcggcgagctttcccccgaacgtgccttctggcgcttcagcctggatgctttctccatcgagttc…	MHAPQSSDSNHTEIDLAQLFEQCWASRRSIALITALGTGAALAYALLATPIYQVDVLLRPVQTRALEALNIKGLYSITPKQALDRVSNELTAYSGRRTYFEAHPEQFEQLEFGELSPERAFWRFSLDAFSIEFADKKEKTPRTEALVRFSMQYPKGMDGVAILNGLLSATLEREHRQIQEDVQARIDNRLQVLERDIAAMQASYATAKRSRIATLMEADAIRRANLQDELKALRGRLRLVRDSRIQQLDEAIGIASQLGIRKPTTPGVLGEDGRDSSRSLFRTEVNNQQIPLYFMGVDALKAERGILLRRKTDDFTSPRIAVIQQELKQLEHNREIQYLQAREDEERFYENLAALRGEQARLLRLNIGETNIQLVRVDQEAATPLKPVRPKRALLVALG…
KB-PA_3-chr1	3467827	3466826	-	CDS	Sodium/bile acid symporter family	atgtcccgaccgcgtttccttccggataacttcaccctggcgctgatcgccaccgtccttctcgccactttcctgccctgcagcggccagaccgccgtggtcttcgaatgggtgaccaacgtcggcatcggcctgctgttcttcctccacggcgccaagctgtcgcgccaggcgatcatcgccggcatgacccactggcgcctgcacctgctggtgttcgcctgcaccttcgtgatgttcccgctgctcggcctggcgctgaaaccggcgctgtcgccgatggtcaccccggagctgtacctcggcatcctgttcctctgcgccctgccggccacggtgcaatcctccatcgccttcacctcgctggcgcgcggcaacgtgccggccgcggtatgcagc…	MSRPRFLPDNFTLALIATVLLATFLPCSGQTAVVFEWVTNVGIGLLFFLHGAKLSRQAIIAGMTHWRLHLLVFACTFVMFPLLGLALKPALSPMVTPELYLGILFLCALPATVQSSIAFTSLARGNVPAAVCSASVSSLLGVFLTPLLVKLLLGAEGETGNALDAIGKITLQLLVPFIAGQVLRRWIGAWVERNKPVLRYVDQGSILLVVYTAFSAAVIQGLWHEIPWLALLGLTVACCVILALALVLTTVLARRLGFSKEDEITIVFCGSKKSLATGVPMAKVLFATSAVGPMVLPLMLFHQIQLMVCAVLAQRYARRRDDAAAALAEASSR
KB-PA_3-chr1	3468371	3467979	-	CDS	hypothetical protein	atgtcaaccctcgccccccttttcctggccaaacaccctgacggcgaagaacgccaggtgatccgcccgaacgtctgggaaacctcctgtgcagatgccgagaccctgtcgatcttccatatcgagggcatggccgatccggacctgctgtgccgggtgctgaacctgttcgccgtgcaatccttcaccccggagcgggttcgcgccgaccgcgaggaccacaagatccgcctgctgctgaccttccccggcctcagccagcaccgcgccagcgtgatcgcggagaagctgcgctcgctggtcaccgtgctcgccgtccgcctggaattctctccccatgccggcaaggtccgtcccagcctcagcgagccgctgctggccagcgtcgtctga	MSTLAPLFLAKHPDGEERQVIRPNVWETSCADAETLSIFHIEGMADPDLLCRVLNLFAVQSFTPERVRADREDHKIRLLLTFPGLSQHRASVIAEKLRSLVTVLAVRLEFSPHAGKVRPSLSEPLLASVV
KB-PA_3-chr1	3468504	3468977	+	CDS	Transcriptional regulator, AsnC family	atgtccattccattggatatgtacgatcagcgtattcttgcgttgctgcaggaggaatcctcgctgtctaccgccgagatcgccgagcgcatcggactttcccagtcgccctgctggcggcgcatccagcgcctgaaggaggagggggtgatccgcaaacaggtgaccctgctcgaccgcaagaagatcggcctgaatacccaggtattcgcccagatcaagctcaacgcccatgggcgcaagaacctcaccgacttcgccgaggcgatgcaccagtttcccgaggtgctggagtgccacgtactgatgggcgcggtggacttcatgctgcgtatcgtcacccgcgatatcgaatcctacgaacgctttttcttcgagaagctgtcggcggtgccgggc…	MSIPLDMYDQRILALLQEESSLSTAEIAERIGLSQSPCWRRIQRLKEEGVIRKQVTLLDRKKIGLNTQVFAQIKLNAHGRKNLTDFAEAMHQFPEVLECHVLMGAVDFMLRIVTRDIESYERFFFEKLSAVPGIQEVNSIVALSEIKSTTTLPLLAP
KB-PA_3-chr1	3469001	3469306	+	CDS	hypothetical protein	atgaccatcagcaagaccaagtccagcttctatcgccgcctctatgtcgcccacctgatcgacagcggcgttgccagcgtgccggagatcatggccgccaccggcatgccccggcgcaccgcccaggacaccatcgccgcgctggaggaactggatatcgtctgcgagttcgagcagcaggaaggcgcgcgtaaccaccagggtagctatgtgatccgcgactggggcgcggttcggcgggaatgggtgacgcgacatcgcgcgaagctcgccgaggcgttggaatatccggcgttacccgcctga	MTISKTKSSFYRRLYVAHLIDSGVASVPEIMAATGMPRRTAQDTIAALEELDIVCEFEQQEGARNHQGSYVIRDWGAVRREWVTRHRAKLAEALEYPALPA
KB-PA_3-chr1	3470168	3469359	-	CDS	hypothetical protein	atgactatcgtcaaaggtatttcccggtttttcctcgctttcggcctcagccttgccagtggattctcccaggccggcccggtggtcacggtggaagcggtcagctccgtgaacgaacaggtctcctcgcggctactcaaatccgtgcgctaccacgtcgacatggcgggacgcgctgtcgccgaagagcaattgaacccgtccaacgcggcgaaaaaggaactggtctcgaaatggcgctccagtaccaccgcgcgcttcgaatacagctacgtccaggaaggcgtcgaacatctgcgcgtctataacgcgatgtccgggcaagacctgcgcgacctgctcaaggtgccgcaggaccatccgctctattcggggttcgacgaacgcttcgccgcaaga…	MTIVKGISRFFLAFGLSLASGFSQAGPVVTVEAVSSVNEQVSSRLLKSVRYHVDMAGRAVAEEQLNPSNAAKKELVSKWRSSTTARFEYSYVQEGVEHLRVYNAMSGQDLRDLLKVPQDHPLYSGFDERFAARGANAERYVKNIEVPDSRFSASLDIRQADAELKALRNLESDIRSGLVPSGGRLTGFISQAPCESCKPMLENVLPETGYVSEAHISYLPNAREAASDLERQIANKFYGVKKNLVSKDVLEKAAAANASAEGGALEACL
KB-PA_3-chr1	3470440	3470177	-	CDS	hypothetical protein	atgaccgacaaggcgctgttcgactggtacaaggaaaagtaccgcgaccagatgaagcctcgctcccccgaggagccccagagcagtttcctcgccaagctgctggaggtgatcgtaccgatcgccacgctgttcgatggcctggcattgttcgaatccttcgaagccgccgaggctagcgagctgggtgccgaaggcgcgttcagcgaagaagaggcggaaggcatttccgctgcatccctaagcaagatctgtcgtatctga	MTDKALFDWYKEKYRDQMKPRSPEEPQSSFLAKLLEVIVPIATLFDGLALFESFEAAEASELGAEGAFSEEEAEGISAASLSKICRI
KB-PA_3-chr1	3471289	3470564	-	CDS	hypothetical protein	atgaggcacttcagttcgctgtggctggcaacaaccctggcggccatctcaggctacgcccaggcagattacttttccgatacgctgaccaaggcactccactaccacgcagtcaagaccgacaactcgatcgacttcgacgaacaaacgttgaagaacaccttcctggtcgagcctgaatcgatctactccgacaccgtatccaacccgcccattctcaacagcatcggctgggcgagcgctgtcggcgatttcaatcgcgaccagggcacggcattcgatcccgaggagacgctcggcatcttccttcgcgagaccggactgaccaaggcgcgcccgcatagcgacatcgccgtcgaccgggtgccggagggctatgtcagcttcgaacgcgacgac…	MRHFSSLWLATTLAAISGYAQADYFSDTLTKALHYHAVKTDNSIDFDEQTLKNTFLVEPESIYSDTVSNPPILNSIGWASAVGDFNRDQGTAFDPEETLGIFLRETGLTKARPHSDIAVDRVPEGYVSFERDDPLILANVLKAGVDADLYYHAYELFGWRYGTIAAKFALAAQYLRDSMNAIPLAQHRANGIDTGVLTRFKAAQSYTQLSHGDQNYLMGILDYQLRSPDYRDGQGGFHLPP
KB-PA_3-chr1	3471792	3471550	-	CDS	hypothetical protein	atgatccgctgtcgcaactgcgctgaacacccggccaccgaagagcagatctgtatggtctgcaagcgtcgatccgacatcgatccatacaaggcactgatcgccatggccctgctggtgtattgcggcgtcagcctggcggcctatctgaaaccccgactgccgcccgctcccgccgcccagatcgaacgctaccaggagagcagcgcagggcggacggccatcggtcaggggggcggctga	MIRCRNCAEHPATEEQICMVCKRRSDIDPYKALIAMALLVYCGVSLAAYLKPRLPPAPAAQIERYQESSAGRTAIGQGGG
Additonal Region 17
KB-PA_3-chr1	3688791	3689261	+	CDS	hypothetical protein	atgacgccaccaaatcgtcctgatgtgacgttctattcggacgagtatcgtttttcggtcaggtgctccgtgtttctccggaatgcacagggtgaagtactcgtgcagaagaagaaaacagacaacgaaggcagttgggcacttcctggtggccggctgaaagtcggtgagtctctggtcggcggtgtcagccgggaaatcaccgaagagttcgcagtagcaacaagcaagcaccggttcctcggtgtcatcgagcaaaatattgtgatcggcgagcagagcatgcatgagcacaatttcatctacagtgccaattacgatggcgcaatcatgctctgtgacgactcactcgattggcaatggatgcctttcgaaaaactcgacacgatcaagcccgtc…	MTPPNRPDVTFYSDEYRFSVRCSVFLRNAQGEVLVQKKKTDNEGSWALPGGRLKVGESLVGGVSREITEEFAVATSKHRFLGVIEQNIVIGEQSMHEHNFIYSANYDGAIMLCDDSLDWQWMPFEKLDTIKPVGCGRLLDASSSLISNGFFTEAAK
KB-PA_3-chr1	3690447	3689599	-	CDS	hypothetical protein	atgcctgaacactggactcggacgctaccccgcgtacgcggcgacagtctggaaatccgtcccggccggcgcatcagcctggcccacagtcgtggtcacagccatccacgcatcgtggtgttcttcgcccatggcggcggcggcaacaaggatcaatggcgcgagcaatggcgcgcgctggaggaggaggggtacagcctggtggcctgggacctgctcggccacggcgccagcgacaagccccggcgcgcggcggactacgcctgggacgaactggtcgccgaccaggtggaggtgctgcgtcgtttcgccggcgagcgcaacgtcctggccgcgcattccttcggcaccggcctgagcctcagcagcctactgagactgcaggccgacggccagggt…	MPEHWTRTLPRVRGDSLEIRPGRRISLAHSRGHSHPRIVVFFAHGGGGNKDQWREQWRALEEEGYSLVAWDLLGHGASDKPRRAADYAWDELVADQVEVLRRFAGERNVLAAHSFGTGLSLSSLLRLQADGQGALVDAALLLGTQLQRPLPRGGLLSLPSWLLEWFRPVLSRGFRQRAWHTDADPALIDYEEALTRNNRLDVFKALVGQATWLPEDELDRLRLPVRILAGDSDGLTPAERGRALHERLVDSQFEVLERCGHQLMLERPEVVNRHLRELLGRI
KB-PA_3-chr1	3691648	3690440	-	CDS	Nitrilotriacetate monooxygenase component A (EC 1.14.13.-)	atgagcgcagcacggcaaatggcgctaggtgcgttcctgatggcgaccgggcatcacctggccggttggcgtcatccccacgcccatgctggcggcggcctcgatatcgagcattatcgggccctggcgcgcagcgccgagcgcggctgtttcgatgcgatcttcctttccgataccctggccatgctcccgggacatctcgacgctctcagccgaatggcccgcaccgagcatttcgagcccctcacgctgctcgcatacctggcggtcgctacctgccgcatcgggctggtggcgaccgtcacctcgtcctataacaacccggctgacgtggcgtcgaccttcgccagcctggaagcgctcagcggcggccgcagcggctggaacctggtgacatcg…	MSAARQMALGAFLMATGHHLAGWRHPHAHAGGGLDIEHYRALARSAERGCFDAIFLSDTLAMLPGHLDALSRMARTEHFEPLTLLAYLAVATCRIGLVATVTSSYNNPADVASTFASLEALSGGRSGWNLVTSSNAREAGNFGRERHYEHACRYRLAEGFLQRVRLDWRRRGVAPVQVLAGASESGKQLAARYAELLFTAQPERAGAQAFYRDIKSRLARLGRDPASLKIMPGVLPILGASRAQAEERRAQLCELVQPAVGLSLLSDVAGGFDLSPFPLDGPLPDLPPTESGVSRQHLLLDLARREGLSIRQLYQRIADARGHRVVSGTAVDIADQLQDWFESDAADGFNIMPPHLPGGLDDFVDQVVPELQRRGLFRHRYQGRTLRDHLGLAHSKEIA…
KB-PA_3-chr1	3693255	3691645	-	CDS	Oligopeptide transport system permease protein OppB (TC 3.A.1.5.1)	atgagcggcagtctgctggaagtacgcgacctgcgtatcgacctgccggagggaggcgaccgtccctgtgcgctgaacgggttgtcgatcgaactggacgccggcgaagtgctttgcgtggtcggtgaatccggctcgggcaagtcgatgctggccaacgccattctgcgcctgctgccgcagcatctgcggccggtcgccggcagcatccgctttcgcggcgaggatctggccgggcgcagcgaggaagggatgcgccagttgcgcggcagggacatcgccatggtcttccaggagcccatgagcgcgctcaatccgctgctgtgcatcggtcggcagatcgatgaaggcctgcgcgcccatggcgtcgcgccagcctccaggaggcgcgcgcgggtg…	MSGSLLEVRDLRIDLPEGGDRPCALNGLSIELDAGEVLCVVGESGSGKSMLANAILRLLPQHLRPVAGSIRFRGEDLAGRSEEGMRQLRGRDIAMVFQEPMSALNPLLCIGRQIDEGLRAHGVAPASRRRARVLELLGYVGLPEPEVLYHAYPFQLSGGQRQRVVIAIALALEPALLIADEPTSALDVSTQAQILDLLRRIRREKGMAVLLITHDFAVVEAIADRVLVMEQGSAVEQGGLRQVLDYPRHPYTRRLLAARQPRQRSAPGYARDTDPLLEVRDLYKHYDSRQGLWRRRRVTALAEAGFSLRPGECLGIVGESGSGKTTLGRALVRLLRPDSGQILLNGADLAPLSQRRLRPLRQQVQMVFQDPFASLNPRQRIGRQIMAGPLAHGVPPAEA…
KB-PA_3-chr1	3694088	3693252	-	CDS	ABC transporter, permease protein 2 (cluster 5, nickel/peptides/opines)	atgagcgcgatgcatgcgttctcccgccctggcgcgctgctggctggcgccttcctgaccctgctcggcgcggccgcgctgctggcgccatggctttgcgcggcctcgccctgggacatgctggcgcgcccgctgctgccgccgttcagtgacgccagccactggttgggcaccgacatgctcggtcgcgacgtggccaccggattgctctacggcgcgcgtacctcgctgagcgtgggcctgctggcgagcctggcgacgttgctgccggcgctgctggtcggtgctgtcgccggctacttcggcggctggatcgacgaactgctgatgcgtatcgccgagtgcttccagatcatcccgcaactggtgctggcggtggtcctcgtagccctgctggag…	MSAMHAFSRPGALLAGAFLTLLGAAALLAPWLCAASPWDMLARPLLPPFSDASHWLGTDMLGRDVATGLLYGARTSLSVGLLASLATLLPALLVGAVAGYFGGWIDELLMRIAECFQIIPQLVLAVVLVALLEPSVGSVVLALALVAWPPVARLVRSEVLSLRQREFVQAALVLGQSPARIVFAQILPNALSPLLVSLTFILAAAILTEAALAFLGLGDPEAMSWGYMINASRNLLRDAPSMSLLPGVAILLTVLSVQRVGEALRQALQAPGEQGGRR
KB-PA_3-chr1	3695077	3694085	-	CDS	ABC transporter, permease protein 1 (cluster 5, nickel/peptides/opines)	atgagcctgctgctgtatgccggagcgcgcctgggacgggcactggcgctgatcgtcgcggtgctggtcggcgccttcctgttgctgcgcctggcgcctggcgatccggcgctgctgatggccggcgaggcgggcagcgacgacggcgagtacatcgcccggttgcgcggcgagatgggcctggacctgccgttgacgctgcaattgtggcgttatctcgggcaggtcgcgcagctcgacctgggctattcctaccgtaaccaggagggcgtctggccgctgatcgccgagcgcctgccggccaccctggtgctcatggggtcggcgttcgccgtctcgctgagcctgggcgtaaccctcggcgtgctggcggcgcgcagccagcagggcagcgggcgg…	MSLLLYAGARLGRALALIVAVLVGAFLLLRLAPGDPALLMAGEAGSDDGEYIARLRGEMGLDLPLTLQLWRYLGQVAQLDLGYSYRNQEGVWPLIAERLPATLVLMGSAFAVSLSLGVTLGVLAARSQQGSGRLDRLIGRAVWVLFATPPFWLALLLVLLFSVRLGWLPAFGMQSVGAELSGWGWLADRLGHLALPCLSLSFLSLAMYVHLTRSAMLDILPLEHVRLARAKGLGESRVLLGHVLRNALVPVVTFAGLQLGQLASGALLVEVVYAWPGIGRLLYDALSQRDYALLLGVFLVISCLVVAFNFLTDLLCRLLDPRIGVAGEAR
KB-PA_3-chr1	3696678	3695074	-	CDS	ABC transporter, substrate-binding protein (cluster 5, nickel/peptides/opines)	atgaccagtcccactttccgcctcgcgccccggcgttcccgccatgcccggttgctcgccggcttgctggcggccggcctggccatggcgggtgccgcctcggcggaaccgacccgcggcggccagctcgacctggtggcccagccggagccgccgtcgctgtcccacgcggtggtcagccacgtcgccactcaatacgtcggcggcaagatcctcgaaggactgatcaccttcgacaccgagctgaagccgcagcccgtgctggcgcgcaactggagcgtcgcggcggatggcctgacctataccttcgaattgcagcccgacgtgaagtggcatgacggacagccgttcggcgccgacgatgtggtgttcagcttcagcgacttctacccgcaggtg…	MTSPTFRLAPRRSRHARLLAGLLAAGLAMAGAASAEPTRGGQLDLVAQPEPPSLSHAVVSHVATQYVGGKILEGLITFDTELKPQPVLARNWSVAADGLTYTFELQPDVKWHDGQPFGADDVVFSFSDFYPQVDKRMASIFAEYVDSVQARGDSQVVFRLKKPFSPLLSALGSGLRPIVPRHLYAGTDYRSNPYNLKPVGTGPFVFQEWKRGAYIRLARNPDYWHKGLPYLDGIVYHVIPDAAARAAAFERGEVQVLRSGDADYADLARLSRLPGVAQSEKGYELYPGLAFLQINTRKPGLDNPKVRQAILYSLNRQFIVDNIFFGTGRVASGPFLGAFHDPQLPQYGFDPAKAKALLAESGADVGKLRVRLLNGEKGGAWERLAEYTRQALRPLGIKV…
KB-PA_3-chr1	3696935	3698311	+	CDS	hypothetical protein	atgacccaggactatctcggcaaccccatcgacagctcctccgaggctacccgccaggccatcgatgacttcaccggcggcatgctcgcctaccagacccgcgcggaaggtatcctcgccggcgccgacagcgagcccggatcgatactggccaacgctttcgccggcctgctcatgatgttcgccgaatcgccccaggcccctgccctcgctgcccgctacctgcaacgcgcccacgctgccggccgcgggattccccgcgcggagcgctatcgggcgttgctggcggcctggagcgcggacgatctggcgcaagcgctgcgcctcagcgaactggctctggaagagaacccgcgcgacctattggcggccaagctcaaccagtacttcgagttcaac…	MTQDYLGNPIDSSSEATRQAIDDFTGGMLAYQTRAEGILAGADSEPGSILANAFAGLLMMFAESPQAPALAARYLQRAHAAGRGIPRAERYRALLAAWSADDLAQALRLSELALEENPRDLLAAKLNQYFEFNRGNSPAMLRIALKAVDGTPDVPQAYGMLAFAYEQCHLLDEAEAAAGHALQLLPDEPWAQHALAHVLLTRGRIEEGTRFLEEASGGWQGLNSFMYTHNWWHLALFHLARGNQERVLDIYDRHVWGIFPEYSQDQIGAVSLLARLELAGIDVGPRWQALLPYLRERRGDVVQPFLSLQYLYGLARAGQDEAGELLEALRRQARQAPAFSRAAWADVTLPAAEGLHAHAHGDYPLAARRLGQALPRLHEIGGSHAQRDLFALIELDAQL…
KB-PA_3-chr1	3699400	3698396	-	CDS	endo-type 6-aminohexanoate oligomer hydrolase	atgcccggacccggcccgcgcaacctgatcaccgatattcccggcttgctggttggccatgccaccgacgaacgcgtgcggaccggcgtcaccgtgctacgcccggagcgcgcctggagcgccagcgtggacatccgcggcggcggacccggcggccgcgagtccgcagcgctggaaccgcagaacatggtcggacagctgcatgcactggtgttctccggtggctccgtgttcggccttggcgcggccgacggggtcagtgcggaactctccgcgagcggtatcggcctgcacctgaaggccggcgcgccagccatacccatagtcccggcggcggtgctgcatgacctggccaacggtggcgacaagggctggggcctggagccgccgtatcgtcga…	MPGPGPRNLITDIPGLLVGHATDERVRTGVTVLRPERAWSASVDIRGGGPGGRESAALEPQNMVGQLHALVFSGGSVFGLGAADGVSAELSASGIGLHLKAGAPAIPIVPAAVLHDLANGGDKGWGLEPPYRRLGHEALGNLRAEFALGAVGAGRGAMAGVLPGGLGSASLDLGDGLLVGALVVANPIGSVYMPDGETFWAWPWEQAGEFGGRQPGQRMDCSEPMPELSRLDSMGRLQAGANTTLAVVACNARLSTAECKRLAIMAQDGIARAVRPAHLPFDGDSLFAMASGERELVDGQRRQVELSRIGSAAADCVARAIARGVYLAGVTRAL
KB-PA_3-chr1	3699582	3699770	+	CDS	hypothetical protein	gtgttgcaaacccagcagggaattttcgataccccgcacaaggcattgaaaaaaaaggcctttccagaatggcataacgcttgcctgagcagccggcatgagcttgagcctgccttccgactgatcgcgaccagtccctcccagcaacaagccgttcgccagcgcggcaccccgccgacgccacgataa	MLQTQQGIFDTPHKALKKKAFPEWHNACLSSRHELEPAFRLIATSPSQQQAVRQRGTPPTPR
KB-PA_3-chr1	3699828	3702266	+	CDS	TonB-dependent receptor	atgaaaccagtcatccgtgcccggagcgcctacgccgcccgcacgctgtacagccacagtctcctgttcctcgccatcgcccaggccgtgccggcgcttgccgccgaagccgccgccgggcccggcgccgataatcgcctgggcaccgtggtggtggtcggcaaccggggccaggcgcgtaccctcgccgacagcccgtcgccggtcgatgtgatttccagctcgcaactggaggccaccggccagggcgacctgacccgcgcgttgagccgcgtgctgccttcgttgaacctgccggcctcttccggcttcggctccacctcggtggtgcggccgatcagcctgcgcggtctcaatggcgaccaggtgctggtgctggtgaatggcaagcgccggcac…	MKPVIRARSAYAARTLYSHSLLFLAIAQAVPALAAEAAAGPGADNRLGTVVVVGNRGQARTLADSPSPVDVISSSQLEATGQGDLTRALSRVLPSLNLPASSGFGSTSVVRPISLRGLNGDQVLVLVNGKRRHNSALLNNGTYLNSGSQPVDLDMIPTALVDHVEVLRDGASAQYGSDAIGGVINVVLKQTDHGGRLSTTYGQNYENGDGETARQSGNIGFELPNQGFVNLALDYKHQNLSDRSDNAPYTDSAGNTSLQHTYYGTGLPKVENFSLGYNAELPVNDALTLYSFSTYTNRESSKPLAFHQPASFDGIPTPYPEGIEDNLRFIENDFQAAFGGKGQAAGWDYDLSTTYGQDHARATLTDTYNLSYGAASPTNVDTGVKTFSQWTTNLDLTRA…
KB-PA_3-chr1	3702319	3703653	+	CDS	Nitrilotriacetate monooxygenase [FMNH2]	atgacccgccgtaccgaccagctcaagctcggcgccttcctcgccaacagtggccaccacgtcgccgcctggcgccatcccagggcccaggcggatgccagcctggacttcgactacttcaagcgcgtcgcacagactgccgagcgtggccgcttcgacgccctcttcgtcgccgacgtggtcgccctctggggccatcacctcgacgccctgagccgcaccgcgcgcggcgagcacttcgagccgctgaccctgatggccgcgctggccgccgtcaccagccgcatcggcctgatcgccaccgccaccacaagctacaacgagccctaccacatcgcccgcaagttcgcctcgctggactacctgtccaaggggcgcgccgcctggaacctggtgacc…	MTRRTDQLKLGAFLANSGHHVAAWRHPRAQADASLDFDYFKRVAQTAERGRFDALFVADVVALWGHHLDALSRTARGEHFEPLTLMAALAAVTSRIGLIATATTSYNEPYHIARKFASLDYLSKGRAAWNLVTSVVSDEAWNFGREAHIDHAERYRRAEEFHDVVKGLWDSWEDDAFLRDKASGRYFDPAKLHVLDHKGEFFSVRGPLNVARPPQGHPVLVQAGASEAGKALAARVAEVIFAMAESIPSAQTFYADVKQRAAALGRDPDGIKILPGVTPFVGRTRDEAQALFDEFQELVDPVLGLRLLADTLGEDIDLSTYDLDGPLPETPVGQRGSRRDKVLELARNEGLTIRQLYLRLAGGNPVIGTAEDIAETFDAWFQARACDGFNVFFPYLPGG…
KB-PA_3-chr1	3703650	3704594	+	CDS	hypothetical protein	atgagatcgccgctgccgctcctggcgctgggctgcgcgctcgcccagccagccttcgccctgaacatcctgctcagcaacgacgacggctaccgccatccgaacatccgcgcgctgtacgccgcgctcaaggccgacggccacaacgtgcgcatcgccgcaccgtacagcgaccagagcgcccgcggcggagccttcttcttcggccgcgagacacgggtaggccgcgacgacgacccggcctacccggacagctactacctcaccactaccgaaaccggtatctgcgagagcgcggactgcgccgggcgcaaggtgggcatccggatcagcgcgacgccggtaatggcggttctgctcgggctggacaagatcctgccgaaccctgacctggtgata…	MRSPLPLLALGCALAQPAFALNILLSNDDGYRHPNIRALYAALKADGHNVRIAAPYSDQSARGGAFFFGRETRVGRDDDPAYPDSYYLTTTETGICESADCAGRKVGIRISATPVMAVLLGLDKILPNPDLVIVGPNPGNNLGALNSASGTFNAASVALLSGVPALAVSVDLEERDNQRVAAIVARLVAALARQRQAGGALLPRGVGLNLNLPPLEKLQGARLTRIGSYVPFHARYSDDLGPFDAKLAGKPGIGFAWSPPPGPGNAEDEAVWVARGYLTLSPFNALPGTPDASEGLAAMLTPLLGQHAAKETTP
KB-PA_3-chr1	3704591	3705610	+	CDS	hypothetical protein	atgagccgccggacctttcgcctgggcttcctgaatcgcgtctacgcgccgcaatacgaaccgcgtctgtaccagcagaccgtcgaactgttcgaggccgccgaggatctcggctacgacagcggttggctcgcccagcaccatttcgccagcgagaatggccgcctgccctcgccgttgctcctgctcggcgccgcagccgagcgcacccggcacatccagttgggtaccgggatcgtcgtgcttaatcaggagcagcccctgcgcctggccgaagatgccgccgtcctcgacctgctcagcgaaggccgcctgcaactcggcctgggcgccggtttcgaccccgacagcttcgccgccttcggccagcgcctgcacaaccgccacgcccaatacgac…	MSRRTFRLGFLNRVYAPQYEPRLYQQTVELFEAAEDLGYDSGWLAQHHFASENGRLPSPLLLLGAAAERTRHIQLGTGIVVLNQEQPLRLAEDAAVLDLLSEGRLQLGLGAGFDPDSFAAFGQRLHNRHAQYDQRLERLRQALAGAPLNAEGRVLRPAANGLAHRLWEATSRVEQVAARGNGLILAPDPRADAEPRGQVIERYRAAWNPAHPSAPRVALVRAVFPGSDASARDSSLRRDILAYVERQRRIGIGHADPAQGFEAVLDALGVLHGDPVKIAEQLHQDAPLGADDHLIVQVQTTSTGFTEALRHLETLARDIAPALGWQARQRRPLTQEIPA
KB-PA_3-chr1	3705607	3706641	+	CDS	Alkanal monooxygenase alpha chain (EC 1.14.14.3)	atgagcactccccccttcacgtctgcgcggaccttcaagctcggcttcctcagccacgccttcggcagcgacccgcggcaggtctatcgcgacctgcaggaacagttcgaagtcgccgaggccctcggcttcgacggcggctggatcgcccagcaccacctgagcggcggtttcggccagttgccttcgccattgctgttgttcgccgccatcgccgcgcgcacccgacgcatcgagctgggcactgcggtgataacactgccgctggaggacgccctgcgcctggccgaagacgccgcggtgctcgacgcgctgagcggcgggcgcctgcaactagggctgggcagcggcggcgccaacctggagatattcaatgccttcggccgcgaggccgggaac…	MSTPPFTSARTFKLGFLSHAFGSDPRQVYRDLQEQFEVAEALGFDGGWIAQHHLSGGFGQLPSPLLLFAAIAARTRRIELGTAVITLPLEDALRLAEDAAVLDALSGGRLQLGLGSGGANLEIFNAFGREAGNRQVDFQRAQRTLQDALLGAPLPGTARLRLHPPAAGLRERLWHSHGSTAGAIHAAGQGNGLLLGTATHDPLTVQKPLAEAYLGAWQDATRRPRIGVVRAVFPAEDKVRARAELAADIELHVPRLIREGLIDQAADLESHLRLLNVHHGDPAEVVASLRGDPSLLPYADYFIAVVQSESSTQTQVLRRLESLARDVAPALGWAPAGERLAVAG
KB-PA_3-chr1	3706638	3707675	+	CDS	hypothetical protein	atgagcctgcgcttcgcctggaagctctgcgcccgcggcatccgtcgcggcctcgactggcgggcgcagcccgccgagtgggtgcaactggcccaggccgcggagtacgccggcttcgacgaactctacctgcccggtggcaccgaccaaccggacagtctgatggtcgccgcggcgctctgcgcgcatacccgccggctcggcctgagcctgagcctggctgccgaagccatgctcccggcggcgctcgccgcgaccttgcaaagcctgcagtcgctatccgccggacgagttcgcctgcatctcccggacagcgatcgcggcagcctgcgccgggccttcggcgaagtgctcaaccgcgaccagcggcacgaacgaatcgacgagttcctcgatatc…	MSLRFAWKLCARGIRRGLDWRAQPAEWVQLAQAAEYAGFDELYLPGGTDQPDSLMVAAALCAHTRRLGLSLSLAAEAMLPAALAATLQSLQSLSAGRVRLHLPDSDRGSLRRAFGEVLNRDQRHERIDEFLDILQRLLQAPATPLDHQGRYFHLENAGLGLRDLPPTPLLLDETLGTQRLASRADLCFMDGGSVAQLAASIARLNEAARGLGRSLGHVASFGVIARDSEEQAWDDAARQARALAVATGDKRRRNPAVAELLAGRAGHPARRDEIHPNIWRPIPGEPAVLVGSYAQVAGRLRELHAAGVDQVILHAPGAVREVLRFGERVLPLLRASAGKDASLGH
KB-PA_3-chr1	3707665	3708804	+	CDS	FMNH2-dependent alkanesulfonate monooxygenase (EC 1.14.14.5)	ttggccattgaacgcaaacgccaatccatcgagatcgactggttcctgcccaccaacggcgacggccaccacctgaccagtagcggcctgccgaaggtcgggctgttccagcagggcgagcgcgcgccgaccctcgactacctgcgacaggtggtgcgggccgccgagcaggcggccttcgatggcatcatggtgcctaccgccagcggcttcgaagacccctggctgatcgttgcgctgatggtccaggaggtccgccgattgcaattcatcctgaccctgcgtcccggcgtcgaactgccggcctacagcgcgtacaaggccgcgaccctgcaacaactgagcgacaaccgcctggcgctgcacctggtcagcggctccagccgcttcgagcaacgc…	MAIERKRQSIEIDWFLPTNGDGHHLTSSGLPKVGLFQQGERAPTLDYLRQVVRAAEQAAFDGIMVPTASGFEDPWLIVALMVQEVRRLQFILTLRPGVELPAYSAYKAATLQQLSDNRLALHLVSGSSRFEQRALGDFLEHDERYARSAEFLDVFRATWAGREHHGRHYRTGSPAPIADEAMLPPICFGGASAVAERIAASHAQTYLMWGEPPAMIHERIQRMRELAAAAGRELRFGLRLHVFAAADSRQAWRHVGRLLEEIPRDAIERAQRQLAAYESVGQSRQISLTQGRAHGLRDLEVSPNLWAGVGLVRGGAGTALVGSYAEVAERIEEYRQLGVDTFILSGYPHLEEAIHLGEELLPLLRREAAGAGARKRRRD
KB-PA_3-chr1	3709881	3708805	-	CDS	hypothetical protein	atgagtcaatccccctggggcgcaacgcccgtcctgacgctgccgcagggcgagaagcagcctctttccatccgcgccaaggcactggtattcgccgatccgcgttcgcgccagttgctggagttcctcgaccgggtcggcccgagcgaagtgccggtgctggtcaacggcgaaaccggcaccggcaaggagctggtggcgcgatacatccatgccgccagcggtcgcaagggcgccttcgtcgcggtcaattgcggcgcgatcaacgagaatcttgccgagagcgaactgttcggccatgaggcaggcgccttctccggcgccaccggccgccgcgccggctggttcgaggaggccgacggcggcaccctgttcctcgacgagatcggcgacctgccg…	MSQSPWGATPVLTLPQGEKQPLSIRAKALVFADPRSRQLLEFLDRVGPSEVPVLVNGETGTGKELVARYIHAASGRKGAFVAVNCGAINENLAESELFGHEAGAFSGATGRRAGWFEEADGGTLFLDEIGDLPMPLQVKLLRALQEQEIVRVGSRKPIKVDIRLVTATNVDLEQAVDAGNFRLDLFYRINVAQARVLPLRERPLDIMPLVEHFRRIYAQRLKIAEPMFSEAAVGALLDYAWPGNIRELENVVHLALLVAGENVVRPGHLKFSAALSGPRGAAGGAAGLPQEIIREQLQRLFEVPGDSLLHDLEDLIVRESFAHCGFNQLRSAALLGISRNAMRTLLVNHGLLKGRAKA
Additonal Region 18
KB-PA_3-chr1	3920753	3907650	-	CDS	Polyketide synthase modules and related proteins	gtgcaagagctgcttaagtccgtaaggtcactctctcagaaagaacgcaaggccctcgcggccttgctcaagcgtcaaggagtgaacctgtatggaataacccctgtactcaagcgctctccggaggagccgttgcagctgtcctacgcccagcaacggcaatggttcctctggcaactggaaccgggcagcgcggcctaccacattccggcggtcctgcgtctgcatggtgaactcgacaccgaagccttgaaacgcagcttcgccgcactggtggagcgtcatgaggtattgcgcaccaccttccgccaggaaggcgacgagacactgcaggtcgtacatgacgacctgcctctggagctgcgcgaagagaccatgagtgggacggatgagtccgca…	MQELLKSVRSLSQKERKALAALLKRQGVNLYGITPVLKRSPEEPLQLSYAQQRQWFLWQLEPGSAAYHIPAVLRLHGELDTEALKRSFAALVERHEVLRTTFRQEGDETLQVVHDDLPLELREETMSGTDESALLLRIEDEVLLPFDLERGPLLRVLLLRLSAEEQVLVVTLHHIVSDGWSTPIMVEELMQFYAGYREGRAVELEPLPIQYADYALWQRSWMEAGERERQLAYWRQQLGGEQPVLELPTDRPRPSVQSPAGDSLQVELGEDLGRSLKQLAQQQGVTLFMLLLASFQTLLHRYSGQPEIRVGVPIANRTRVETERLIGFFVNTQVLKADFDLETRFDALLQQVKRTALEAQAHQDLPFEQLVEALQPQRSLSHSPLFQVMYNHQNAGQGK…
[truncated: 433 more rows]

## Sheet: Additional regions of KB-PA_F19
location	start	stop	strand	type	function	nucleotide_sequence	aa_sequence
Additonal Region 1
[truncated: 263 more rows]

## Sheet: Predicted Propgages
KB-PA_3-Chr1
Region	length	Completeness	Score	# Total Proteins	Position	Most Common Phage	GC%
1	45.8Kb	intact	129	38	649730-695622	PHAGE_Pseudo_phi3_NC_030940	0.6248
2	29.5Kb	intact	150	33	736047-765596	PHAGE_Pseudo_YMC11/02/R656_NC_028657	0.6412
3	34.3Kb	intact	141	46	1430598-1464938	PHAGE_Pseudo_phi3_NC_030940	0.6388
4	60.2Kb	intact	95	62	1717463-1777739	PHAGE_Pseudo_JBD25_NC_027992	0.6302
5	43Kb	intact	113	57	1854441-1897454	PHAGE_Pseudo_Dobby_NC_048109	0.633
6	44.7Kb	intact	100	46	1999208-2043910	PHAGE_Pseudo_F10_NC_007805	0.6204
7	14.4Kb	incomplete	40	21	2133387-2147855	PHAGE_Haemop_Aaphi23_NC_004827	0.6611
[truncated: 13 more rows]
